# Supplementary material
Source: publisher figshare collection journal article supplement (https://gsajournals.figshare.com/articles/dataset/_/14946033)
Supplement: Supplementary file 1 [file 1]

## Sheet: Table S1
Table S1: Quality-filtered NVPT phenotype data obtained from AHDB for UK winter wheat on eight traits from 2002 - 2017
Trait	Year	VarietyRename	Location	County	Previous Crop	Soil Type	Value	Units
Days to Ripening	2002	ACCESS	WORKSOP	NOTTINGHAMSHIRE	-	-	300	Days
Days to Ripening	2002	ACCESS	SLEAFORD	LINCOLNSHIRE	-	-	294	Days
Days to Ripening	2002	ACCESS	FAKENHAM	NORFOLK	-	-	290	Days
Days to Ripening	2002	ACCESS	KINGSLYNN	NORFOLK	-	-	298	Days
Days to Ripening	2002	ACCESS	KETTG	NORTHAMPTONSHIRE	-	-	307	Days
Days to Ripening	2002	ACCESS	OLDM	ABERDEENSHIRE	-	-	342	Days
Days to Ripening	2002	ACCESS	WYMONDHAM	NORFOLK	-	-	306	Days
Days to Ripening	2002	ACCESS	SPALDING	LINCOLNSHIRE	-	-	285	Days
Days to Ripening	2002	ACCESS	OTLEY	SUFFOLK	-	-	302	Days
Days to Ripening	2002	ACCESS	ASHFD	KENT	-	-	313	Days
Days to Ripening	2002	ACCESS	TELFORD	SHROPSHIRE	-	-	314	Days
Days to Ripening	2002	ACCESS	WARMR	WILTSHIRE	-	-	316	Days
Days to Ripening	2002	ACCESS	COUPAR	PERTH AND KINROSS	-	-	326	Days
Days to Ripening	2002	ACCESS	WINCHESTER	HAMPSHIRE	-	-	311	Days
Days to Ripening	2002	ACCESS	WIMBOURNESTGILES	DORSET	-	-	293	Days
Days to Ripening	2002	ACCESS	ANNAN	DUMFRIES AND GALLOWAY	-	-	315	Days
Days to Ripening	2002	ACCESS	LIMAVADY	CAUSEWAY COAST AND GLENS	-	-	315	Days
Days to Ripening	2002	ACCESS	EDINB	CITY OF EDINBURGH	-	-	329	Days
Days to Ripening	2002	ACCESS	COLDSM	SCOTTISH BORDERS	-	-	321	Days
Days to Ripening	2002	ACCESS	CROFT-ON-TEES	NORTH YORKSHIRE	-	-	320	Days
Days to Ripening	2002	ACCESS	TADCASTER	NORTH YORKSHIRE	-	-	305	Days
Days to Ripening	2003	ACCESS	ABERDEEN	ABERDEENSHIRE	GRASS	SANDY CLAY LOAM	329	Days
Days to Ripening	2003	ACCESS	WORKSOP	NOTTINGHAMSHIRE	VEGETABLES	LIGHT SAND	307	Days
Days to Ripening	2003	ACCESS	WATERBEACH	CAMBRIDGESHIRE	PEAS	PEATY SOIL	279.3	Days
Days to Ripening	2003	ACCESS	FAKENHAM	NORFOLK	BEET	LIGHT SAND	280.7	Days
Days to Ripening	2003	ACCESS	ELGIN	MORAY	BARLEY	SANDY CLAY	324	Days
Days to Ripening	2003	ACCESS	WYMONDHAM	NORFOLK	WHEAT	MEDIUM	290	Days
Days to Ripening	2003	ACCESS	SPALDING	LINCOLNSHIRE	PEAS	DEEP FERTILE SILTY	277.3	Days
Days to Ripening	2003	ACCESS	CANTERBURY	KENT	OILSEED RAPE	DEEP FERTILE SILTY	309.7	Days
Days to Ripening	2003	ACCESS	MEMOW	LEICESTERSHIRE	OILSEED RAPE	DEEP CLAY	279	Days
Days to Ripening	2003	ACCESS	WINCHESTER	HAMPSHIRE	POPPY	MEDIUM	304	Days
Days to Ripening	2003	ACCESS	KINGSTON	DEVON	OAT	CLAY LOAM	302	Days
Days to Ripening	2003	ACCESS	LOCKERBIE	DUMFRIES AND GALLOWAY	BARLEY	LIGHT SAND	317	Days
Days to Ripening	2003	ACCESS	LIMAVADY	CAUSEWAY COAST AND GLENS	WHEAT	DEEP CLAY	314	Days
Days to Ripening	2003	ACCESS	HADDINGTON	EAST LOTHIAN	WHEAT	MEDIUM	310.7	Days
Days to Ripening	2003	ACCESS	DUNS	SCOTTISH BORDERS	OILSEED RAPE	DEEP CLAY	321.7	Days
Days to Ripening	2003	ACCESS	CROFT-ON-TEES	NORTH YORKSHIRE	POTATO	DEEP CLAY	316.3	Days
Days to Ripening	2003	ACCESS	TADCASTER	NORTH YORKSHIRE	POTATO	SHALLOW	308.3	Days
Days to Ripening	2004	ACCESS	LAURENCEKIRK	ABERDEENSHIRE	OILSEED RAPE	MEDIUM	340.7	Days
Days to Ripening	2004	ACCESS	RAGNALL	NOTTINGHAMSHIRE	OILSEED RAPE	MEDIUM	327.7	Days
Days to Ripening	2004	ACCESS	WATERBEACH	CAMBRIDGESHIRE	BEANS	ORGANIC	287	Days
Days to Ripening	2004	ACCESS	WOLFERTON	NORFOLK	BEANS	DEEP CLAY	305.7	Days
Days to Ripening	2004	ACCESS	GIRTON	CAMBRIDGESHIRE	BEANS	DEEP CLAY	302	Days
Days to Ripening	2004	ACCESS	WYE	KENT	OILSEED RAPE	MEDIUM	323.7	Days
Days to Ripening	2004	ACCESS	FRISBYONTHEWREAKE	LEICESTERSHIRE	PEAS	DEEP CLAY	307.7	Days
Days to Ripening	2004	ACCESS	COATES	GLOUCESTERSHIRE	WHEAT	SHALLOW	301.7	Days
Days to Ripening	2004	ACCESS	WARWICK	WARWICKSHIRE	WHEAT	DEEP CLAY	305.3	Days
Days to Ripening	2004	ACCESS	UPSOMBORNE	HAMPSHIRE	PEAS	MEDIUM	315	Days
Days to Ripening	2004	ACCESS	LIMAVADY	CAUSEWAY COAST AND GLENS	WHEAT	DEEP CLAY	327	Days
Days to Ripening	2004	ACCESS	HUMBIE	EAST LOTHIAN	WHEAT	MEDIUM	329.3	Days
Days to Ripening	2004	ACCESS	BOWSDN	NORTHUMBERLAND	WHEAT	DEEP CLAY	328.8	Days
Days to Ripening	2004	ACCESS	BRAMHAM	LEEDS	OILSEED RAPE	MEDIUM	311	Days
Days to Ripening	2005	ACCESS	ELGIN	MORAY	POTATO	MEDIUM	317.3	Days
Days to Ripening	2005	ACCESS	RHYND	PERTH AND KINROSS	WHEAT	MEDIUM	333.7	Days
Days to Ripening	2005	ACCESS	LOCKERBIE	DUMFRIES AND GALLOWAY	BARLEY	LIGHT SAND	315.3	Days
Days to Ripening	2005	ACCESS	HUMBIE	EAST LOTHIAN	OILSEED RAPE	MEDIUM	336.7	Days
Days to Ripening	2005	ACCESS	WHITSOME	SCOTTISH BORDERS	WHEAT	DEEP CLAY	324.7	Days
Days to Ripening	2005	ACCESS	BOWSDN	NORTHUMBERLAND	WHEAT	DEEP CLAY	330.3	Days
Days to Ripening	2005	ALCHEMY	RAGNALL	NOTTINGHAMSHIRE	OILSEED RAPE	MEDIUM	316.7	Days
Days to Ripening	2005	ALCHEMY	CTHORPE	LINCOLNSHIRE	LINSEED	MEDIUM	271.7	Days
Days to Ripening	2005	ALCHEMY	WATERBEACH	CAMBRIDGESHIRE	BEANS	ORGANIC	291.7	Days
Days to Ripening	2005	ALCHEMY	WOLFERTON	NORFOLK	BEANS	DEEP CLAY	300.7	Days
Days to Ripening	2005	ALCHEMY	HISTON	CAMBRIDGESHIRE	BEANS	DEEP CLAY	284.7	Days
Days to Ripening	2005	ALCHEMY	ELGIN	MORAY	POTATO	MEDIUM	316.7	Days
Days to Ripening	2005	ALCHEMY	SPALDING	LINCOLNSHIRE	VEGETABLES	DEEP FERTILE SILTY	283.7	Days
Days to Ripening	2005	ALCHEMY	FRAMLINGHAM	SUFFOLK	PEAS	DEEP CLAY	283.7	Days
Days to Ripening	2005	ALCHEMY	NEWCHURCH	KENT	PEAS	DEEP CLAY	314.3	Days
Days to Ripening	2005	ALCHEMY	TELFORD	SHROPSHIRE	OILSEED RAPE	MEDIUM	302.3	Days
Days to Ripening	2005	ALCHEMY	FRISBYONTHEWREAKE	LEICESTERSHIRE	PEAS	DEEP CLAY	297.7	Days
Days to Ripening	2005	ALCHEMY	RHYND	PERTH AND KINROSS	WHEAT	MEDIUM	333.7	Days
Days to Ripening	2005	ALCHEMY	UPSOMBORNE	HAMPSHIRE	GRASS	MEDIUM	305.3	Days
Days to Ripening	2005	ALCHEMY	INCEBLUNDELL	SEFTON	OAT	LIGHT SAND	314.3	Days
Days to Ripening	2005	ALCHEMY	LOCKERBIE	DUMFRIES AND GALLOWAY	BARLEY	LIGHT SAND	315.3	Days
Days to Ripening	2005	ALCHEMY	HUMBIE	EAST LOTHIAN	OILSEED RAPE	MEDIUM	336	Days
Days to Ripening	2005	ALCHEMY	WHITSOME	SCOTTISH BORDERS	WHEAT	DEEP CLAY	325	Days
Days to Ripening	2005	ALCHEMY	BOWSDN	NORTHUMBERLAND	WHEAT	DEEP CLAY	332.3	Days
Days to Ripening	2005	ALCHEMY	BARTHORPE	NORTH YORKSHIRE	OILSEED RAPE	DEEP CLAY	323.7	Days
Days to Ripening	2005	ALCHEMY	HHALL	LEEDS	OILSEED RAPE	SHALLOW	298	Days
Days to Ripening	2006	ALCHEMY	WOLFERTON	NORFOLK	-	-	288.67	Days
Days to Ripening	2006	ALCHEMY	HUMBIE	EAST LOTHIAN	-	-	318.33	Days
Days to Ripening	2006	ALCHEMY	TELFORD	SHROPSHIRE	-	-	304.33	Days
Days to Ripening	2006	ALCHEMY	CRAMBE	NORTH YORKSHIRE	-	-	304	Days
Days to Ripening	2006	ALCHEMY	LIMAVADY	CAUSEWAY COAST AND GLENS	-	-	321.67	Days
Days to Ripening	2006	ALCHEMY	LAURENCEKIRK	ABERDEENSHIRE	-	-	329.33	Days
Days to Ripening	2006	ALCHEMY	ELGIN	MORAY	-	-	326	Days
Days to Ripening	2006	ALCHEMY	W-CHARLT	DEVON	-	-	303	Days
Days to Ripening	2006	ALCHEMY	RHYND	PERTH AND KINROSS	-	-	316	Days
Days to Ripening	2006	ALCHEMY	T-RAWSTN	DORSET	-	-	283.67	Days
Days to Ripening	2006	ALCHEMY	LOCKERBIE	DUMFRIES AND GALLOWAY	-	-	311.33	Days
Days to Ripening	2006	ALCHEMY	MORLEYSTBOTOLPH	NORFOLK	-	-	290	Days
Days to Ripening	2006	ALCHEMY	HYTHE	KENT	-	-	302.33	Days
Days to Ripening	2006	ALCHEMY	BOWSDN	NORTHUMBERLAND	-	-	316	Days
Days to Ripening	2006	ALCHEMY	RAGNALL	NOTTINGHAMSHIRE	-	-	302.33	Days
Days to Ripening	2006	ALCHEMY	HISTON	CAMBRIDGESHIRE	-	-	292	Days
Days to Ripening	2006	ALCHEMY	FRAMLINGHAM	SUFFOLK	-	-	303.67	Days
Days to Ripening	2006	ALCHEMY	FRISBYONTHEWREAKE	LEICESTERSHIRE	-	-	297.67	Days
Days to Ripening	2006	ALCHEMY	SPALDING	LINCOLNSHIRE	-	-	294.33	Days
Days to Ripening	2007	ALCHEMY	WOLFERTON	NORFOLK	-	-	303.33	Days
Days to Ripening	2007	ALCHEMY	C-CREEVY	BELFAST	-	-	315	Days
Days to Ripening	2007	ALCHEMY	LAURENCEKIRK	ABERDEENSHIRE	-	-	333.33	Days
Days to Ripening	2007	ALCHEMY	ULCEBY	NORTH LINCOLNSHIRE	-	-	296	Days
Days to Ripening	2007	ALCHEMY	POTTN	ABERDEENSHIRE	-	-	355	Days
Days to Ripening	2007	ALCHEMY	HYTHE	KENT	-	-	301.67	Days
Days to Ripening	2007	ALCHEMY	BOWSDN	NORTHUMBERLAND	-	-	324.33	Days
Days to Ripening	2007	ALCHEMY	HISTON	CAMBRIDGESHIRE	-	-	299.33	Days
Days to Ripening	2007	ALCHEMY	SPALDING	LINCOLNSHIRE	-	-	296	Days
Days to Ripening	2007	ALCHEMY	HUMBIE	EAST LOTHIAN	-	-	337.33	Days
Days to Ripening	2007	ALCHEMY	CRAMBE	NORTH YORKSHIRE	-	-	319	Days
Days to Ripening	2007	ALCHEMY	HULL	EAST RIDING OF YORKSHIRE	-	-	298.5	Days
Days to Ripening	2007	ALCHEMY	RUDSTON	EAST RIDING OF YORKSHIRE	-	-	316.33	Days
Days to Ripening	2007	ALCHEMY	UPSOMBORNE	HAMPSHIRE	-	-	310.67	Days
Days to Ripening	2008	ALCHEMY	WOLFERTON	NORFOLK	-	-	301.33	Days
Days to Ripening	2008	ALCHEMY	DYCE	ABERDEENSHIRE	-	-	339.67	Days
Days to Ripening	2008	ALCHEMY	HYTHE	KENT	-	-	308.67	Days
Days to Ripening	2008	ALCHEMY	BOWSDN	NORTHUMBERLAND	-	-	314	Days
Days to Ripening	2008	ALCHEMY	WELBOURN	LINCOLNSHIRE	-	-	322	Days
Days to Ripening	2008	ALCHEMY	CAMBRIDGE	CAMBRIDGESHIRE	-	-	311.78	Days
Days to Ripening	2008	ALCHEMY	HUMBIE	EAST LOTHIAN	-	-	338	Days
Days to Ripening	2008	ALCHEMY	BUGTHORPE	NORTH YORKSHIRE	-	-	313	Days
Days to Ripening	2008	ALCHEMY	BURY-STE	SUFFOLK	-	-	293.67	Days
Days to Ripening	2008	ALCHEMY	LAURENCEKIRK	ABERDEENSHIRE	-	-	334	Days
Days to Ripening	2008	ALCHEMY	BINBROOK	NORTH LINCOLNSHIRE	-	-	325	Days
Days to Ripening	2009	ALCHEMY	CROFT-ON-TEES	NORTH YORKSHIRE	BEANS	MEDIUM	322.33	Days
Days to Ripening	2009	ALCHEMY	ULCEBY	NORTH LINCOLNSHIRE	OILSEED RAPE	D-CLAY	300	Days
Days to Ripening	2009	ALCHEMY	DYCE	ABERDEENSHIRE	BARLEY	L-SAND	332.33	Days
Days to Ripening	2009	ALCHEMY	HYTHE	KENT	OILSEED RAPE	D-CLAY	303	Days
Days to Ripening	2009	ALCHEMY	WELBOURN	LINCOLNSHIRE	OILSEED RAPE	SHALLOW	323.33	Days
Days to Ripening	2009	ALCHEMY	BEAUSALE	WARWICKSHIRE	OILSEED RAPE	D-CLAY	304.67	Days
Days to Ripening	2009	ALCHEMY	GIRTON	CAMBRIDGESHIRE	OTHER	MEDIUM	301.33	Days
Days to Ripening	2009	ALCHEMY	HOLBEACH	LINCOLNSHIRE	OTHER	D-SILT	284	Days
Days to Ripening	2009	ALCHEMY	RUDSTON	EAST RIDING OF YORKSHIRE	OILSEED RAPE	SHALLOW	307	Days
Days to Ripening	2009	ALCHEMY	WINCHESTER	HAMPSHIRE	PEAS	MEDIUM	294.67	Days
Days to Ripening	2009	ALCHEMY	FRAMLINGHAM	SUFFOLK	OILSEED RAPE	D-CLAY	296	Days
Days to Ripening	2009	ALCHEMY	LAURENCEKIRK	ABERDEENSHIRE	OILSEED RAPE	MEDIUM	346.33	Days
Days to Ripening	2010	ALCHEMY	CROFT-ON-TEES	NORTH YORKSHIRE	BEANS	MEDIUM	330	Days
Days to Ripening	2010	ALCHEMY	C-CREEVY	BELFAST	BARLEY	MEDIUM	325	Days
Days to Ripening	2010	ALCHEMY	LAURENCEKIRK	ABERDEENSHIRE	OILSEED RAPE	MEDIUM	342	Days
Days to Ripening	2010	ALCHEMY	ELLON	ABERDEENSHIRE	BARLEY	L-SAND	344.33	Days
Days to Ripening	2010	ALCHEMY	ULCEBY	NORTH LINCOLNSHIRE	OILSEED RAPE	D-CLAY	327	Days
Days to Ripening	2010	ALCHEMY	NEWCHURCH	KENT	PEAS	D-CLAY	310.67	Days
Days to Ripening	2010	ALCHEMY	WELBOURN	LINCOLNSHIRE	OILSEED RAPE	SHALLOW	321.67	Days
Days to Ripening	2010	ALCHEMY	HASELY	WARWICKSHIRE	OILSEED RAPE	MEDIUM	305.67	Days
Days to Ripening	2010	ALCHEMY	LILLESDN	SOMERSET	WHEAT	MEDIUM	274.33	Days
Days to Ripening	2010	ALCHEMY	GIRTON	CAMBRIDGESHIRE	BEANS	MEDIUM	298.33	Days
Days to Ripening	2010	ALCHEMY	HUMBIE	EAST LOTHIAN	GRASS	MEDIUM	334.33	Days
Days to Ripening	2010	ALCHEMY	CRAWLY	HAMPSHIRE	OAT	MEDIUM	300.33	Days
Days to Ripening	2010	ALCHEMY	FRAMLINGHAM	SUFFOLK	OILSEED RAPE	D-CLAY	293	Days
Days to Ripening	2010	ALCHEMY	FRISBYONTHEWREAKE	LEICESTERSHIRE	OILSEED RAPE	D-CLAY	301.67	Days
Days to Ripening	2012	ALCHEMY	CROFT-ON-TEES	NORTH YORKSHIRE	-	-	334.33	Days
Days to Ripening	2012	ALCHEMY	WELBOURN	LINCOLNSHIRE	-	-	329.67	Days
Days to Ripening	2012	ALCHEMY	HUMBIE	EAST LOTHIAN	-	-	348.33	Days
Days to Ripening	2012	ALCHEMY	HINSTOCK	SHROPSHIRE	-	-	320.33	Days
Days to Ripening	2012	ALCHEMY	ATTLEBRO	NORFOLK	-	-	282	Days
Days to Ripening	2013	ALCHEMY	WELBOURN	LINCOLNSHIRE	BARLEY	SHALLOW	320	Days
Days to Ripening	2013	ALCHEMY	EDGMOND	SHROPSHIRE	OAT	L-SAND	302	Days
Days to Ripening	2013	ALCHEMY	ALKERTON	OXFORDSHIRE	BARLEY	L-SAND	323	Days
Days to Ripening	2014	ALCHEMY	CROFT-ON-TEES	NORTH YORKSHIRE	BEANS	MEDIUM	317.33	Days
Days to Ripening	2014	ALCHEMY	MORLEYSTBOTOLPH	NORFOLK	OILSEED RAPE	MEDIUM	294	Days
Days to Ripening	2014	ALCHEMY	AUCHNAGATT	ABERDEENSHIRE	WHEAT	L-SAND	340	Days
Days to Ripening	2014	ALCHEMY	ST-BOSW	SCOTTISH BORDERS	POTATO	L-SAND	325	Days
Days to Ripening	2014	ALCHEMY	BALGONIE	FIFE	OILSEED RAPE	L-SAND	333.33	Days
Days to Ripening	2014	ALCHEMY	ALKERTON	OXFORDSHIRE	BEANS	L-SAND	311	Days
Days to Ripening	2014	ALCHEMY	LUTHERMR	ABERDEENSHIRE	POTATO	MEDIUM	311.33	Days
Days to Ripening	2014	ALCHEMY	WELBOURN	LINCOLNSHIRE	BARLEY	SHALLOW	304.33	Days
Days to Ripening	2014	ALCHEMY	EDGMOND	SHROPSHIRE	GRASS	MEDIUM	306.33	Days
Days to Ripening	2014	ALCHEMY	SANCTON	EAST RIDING OF YORKSHIRE	OILSEED RAPE	MEDIUM	303	Days
Days to Ripening	2015	ALCHEMY	LIMAVADY	CAUSEWAY COAST AND GLENS	OILSEED RAPE	MEDIUM	332	Days
Days to Ripening	2015	ALCHEMY	ST-BOSW	SCOTTISH BORDERS	OILSEED RAPE	L-SAND	339.67	Days
Days to Ripening	2015	ALCHEMY	BALGONIE	FIFE	OILSEED RAPE	L-SAND	347	Days
Days to Ripening	2015	ALCHEMY	ALKERTON	OXFORDSHIRE	BEANS	L-SAND	310	Days
Days to Ripening	2015	ALCHEMY	LUTHERMR	ABERDEENSHIRE	POTATO	MEDIUM	339.67	Days
Days to Ripening	2015	ALCHEMY	CROFT-ON-TEES	NORTH YORKSHIRE	BEANS	MEDIUM	332.33	Days
Days to Ripening	2015	ALCHEMY	WELBOURN	LINCOLNSHIRE	BARLEY	SHALLOW	321.33	Days
Days to Ripening	2015	ALCHEMY	HUMBIE	EAST LOTHIAN	OILSEED RAPE	MEDIUM	351.33	Days
Days to Ripening	2015	ALCHEMY	MORLEYSTBOTOLPH	NORFOLK	OILSEED RAPE	MEDIUM	304	Days
Days to Ripening	2004	AMBROSIA	LAURENCEKIRK	ABERDEENSHIRE	OILSEED RAPE	MEDIUM	338	Days
Days to Ripening	2004	AMBROSIA	RAGNALL	NOTTINGHAMSHIRE	OILSEED RAPE	MEDIUM	326.3	Days
Days to Ripening	2004	AMBROSIA	WATERBEACH	CAMBRIDGESHIRE	BEANS	ORGANIC	287.7	Days
Days to Ripening	2004	AMBROSIA	WOLFERTON	NORFOLK	BEANS	DEEP CLAY	305	Days
Days to Ripening	2004	AMBROSIA	GIRTON	CAMBRIDGESHIRE	BEANS	DEEP CLAY	302	Days
Days to Ripening	2004	AMBROSIA	WYE	KENT	OILSEED RAPE	MEDIUM	321.3	Days
Days to Ripening	2004	AMBROSIA	FRISBYONTHEWREAKE	LEICESTERSHIRE	PEAS	DEEP CLAY	301	Days
Days to Ripening	2004	AMBROSIA	COATES	GLOUCESTERSHIRE	WHEAT	SHALLOW	301.7	Days
Days to Ripening	2004	AMBROSIA	WARWICK	WARWICKSHIRE	WHEAT	DEEP CLAY	304	Days
Days to Ripening	2004	AMBROSIA	UPSOMBORNE	HAMPSHIRE	PEAS	MEDIUM	311	Days
Days to Ripening	2004	AMBROSIA	LIMAVADY	CAUSEWAY COAST AND GLENS	WHEAT	DEEP CLAY	327	Days
Days to Ripening	2004	AMBROSIA	HUMBIE	EAST LOTHIAN	WHEAT	MEDIUM	330	Days
Days to Ripening	2004	AMBROSIA	BOWSDN	NORTHUMBERLAND	WHEAT	DEEP CLAY	327.2	Days
Days to Ripening	2004	AMBROSIA	BRAMHAM	LEEDS	OILSEED RAPE	MEDIUM	311	Days
Days to Ripening	2005	AMBROSIA	RAGNALL	NOTTINGHAMSHIRE	OILSEED RAPE	MEDIUM	310	Days
Days to Ripening	2005	AMBROSIA	CTHORPE	LINCOLNSHIRE	LINSEED	MEDIUM	269.7	Days
Days to Ripening	2005	AMBROSIA	WATERBEACH	CAMBRIDGESHIRE	BEANS	ORGANIC	290.3	Days
Days to Ripening	2005	AMBROSIA	WOLFERTON	NORFOLK	BEANS	DEEP CLAY	301.3	Days
Days to Ripening	2005	AMBROSIA	HISTON	CAMBRIDGESHIRE	BEANS	DEEP CLAY	288.3	Days
Days to Ripening	2005	AMBROSIA	ELGIN	MORAY	POTATO	MEDIUM	317	Days
Days to Ripening	2005	AMBROSIA	SPALDING	LINCOLNSHIRE	VEGETABLES	DEEP FERTILE SILTY	283	Days
Days to Ripening	2005	AMBROSIA	FRAMLINGHAM	SUFFOLK	PEAS	DEEP CLAY	281.7	Days
Days to Ripening	2005	AMBROSIA	NEWCHURCH	KENT	PEAS	DEEP CLAY	313	Days
Days to Ripening	2005	AMBROSIA	TELFORD	SHROPSHIRE	OILSEED RAPE	MEDIUM	301	Days
Days to Ripening	2005	AMBROSIA	FRISBYONTHEWREAKE	LEICESTERSHIRE	PEAS	DEEP CLAY	295.7	Days
Days to Ripening	2005	AMBROSIA	RHYND	PERTH AND KINROSS	WHEAT	MEDIUM	332.3	Days
Days to Ripening	2005	AMBROSIA	UPSOMBORNE	HAMPSHIRE	GRASS	MEDIUM	305.7	Days
Days to Ripening	2005	AMBROSIA	INCEBLUNDELL	SEFTON	OAT	LIGHT SAND	307.7	Days
Days to Ripening	2005	AMBROSIA	LOCKERBIE	DUMFRIES AND GALLOWAY	BARLEY	LIGHT SAND	313.7	Days
Days to Ripening	2005	AMBROSIA	HUMBIE	EAST LOTHIAN	OILSEED RAPE	MEDIUM	335	Days
Days to Ripening	2005	AMBROSIA	WHITSOME	SCOTTISH BORDERS	WHEAT	DEEP CLAY	323	Days
Days to Ripening	2005	AMBROSIA	BOWSDN	NORTHUMBERLAND	WHEAT	DEEP CLAY	330.3	Days
Days to Ripening	2005	AMBROSIA	BARTHORPE	NORTH YORKSHIRE	OILSEED RAPE	DEEP CLAY	319.3	Days
Days to Ripening	2005	AMBROSIA	HHALL	LEEDS	OILSEED RAPE	SHALLOW	295	Days
Days to Ripening	2006	AMBROSIA	WOLFERTON	NORFOLK	-	-	285.33	Days
Days to Ripening	2006	AMBROSIA	HUMBIE	EAST LOTHIAN	-	-	317	Days
Days to Ripening	2006	AMBROSIA	TELFORD	SHROPSHIRE	-	-	304	Days
Days to Ripening	2006	AMBROSIA	CRAMBE	NORTH YORKSHIRE	-	-	302	Days
Days to Ripening	2006	AMBROSIA	LIMAVADY	CAUSEWAY COAST AND GLENS	-	-	320.33	Days
Days to Ripening	2006	AMBROSIA	LAURENCEKIRK	ABERDEENSHIRE	-	-	324.67	Days
Days to Ripening	2006	AMBROSIA	ELGIN	MORAY	-	-	326	Days
Days to Ripening	2006	AMBROSIA	W-CHARLT	DEVON	-	-	303	Days
Days to Ripening	2006	AMBROSIA	RHYND	PERTH AND KINROSS	-	-	317.33	Days
Days to Ripening	2006	AMBROSIA	T-RAWSTN	DORSET	-	-	277	Days
Days to Ripening	2006	AMBROSIA	LOCKERBIE	DUMFRIES AND GALLOWAY	-	-	311	Days
Days to Ripening	2006	AMBROSIA	MORLEYSTBOTOLPH	NORFOLK	-	-	288	Days
Days to Ripening	2006	AMBROSIA	HYTHE	KENT	-	-	303.33	Days
Days to Ripening	2006	AMBROSIA	BOWSDN	NORTHUMBERLAND	-	-	315.67	Days
Days to Ripening	2006	AMBROSIA	RAGNALL	NOTTINGHAMSHIRE	-	-	301	Days
Days to Ripening	2006	AMBROSIA	HISTON	CAMBRIDGESHIRE	-	-	289	Days
Days to Ripening	2006	AMBROSIA	FRAMLINGHAM	SUFFOLK	-	-	301	Days
Days to Ripening	2006	AMBROSIA	FRISBYONTHEWREAKE	LEICESTERSHIRE	-	-	293	Days
Days to Ripening	2006	AMBROSIA	SPALDING	LINCOLNSHIRE	-	-	295	Days
Days to Ripening	2007	AMBROSIA	WOLFERTON	NORFOLK	-	-	302.33	Days
Days to Ripening	2007	AMBROSIA	C-CREEVY	BELFAST	-	-	315	Days
Days to Ripening	2007	AMBROSIA	LAURENCEKIRK	ABERDEENSHIRE	-	-	330	Days
Days to Ripening	2007	AMBROSIA	ULCEBY	NORTH LINCOLNSHIRE	-	-	285.67	Days
Days to Ripening	2007	AMBROSIA	POTTN	ABERDEENSHIRE	-	-	354.33	Days
Days to Ripening	2007	AMBROSIA	HYTHE	KENT	-	-	301	Days
Days to Ripening	2007	AMBROSIA	BOWSDN	NORTHUMBERLAND	-	-	321.67	Days
Days to Ripening	2007	AMBROSIA	HISTON	CAMBRIDGESHIRE	-	-	294.67	Days
Days to Ripening	2007	AMBROSIA	SPALDING	LINCOLNSHIRE	-	-	294	Days
Days to Ripening	2007	AMBROSIA	HUMBIE	EAST LOTHIAN	-	-	335.33	Days
Days to Ripening	2007	AMBROSIA	CRAMBE	NORTH YORKSHIRE	-	-	311	Days
Days to Ripening	2007	AMBROSIA	HULL	EAST RIDING OF YORKSHIRE	-	-	296.5	Days
Days to Ripening	2007	AMBROSIA	RUDSTON	EAST RIDING OF YORKSHIRE	-	-	313	Days
Days to Ripening	2007	AMBROSIA	UPSOMBORNE	HAMPSHIRE	-	-	311.33	Days
Days to Ripening	2002	ARRAN	WORKSOP	NOTTINGHAMSHIRE	-	-	301	Days
Days to Ripening	2002	ARRAN	SLEAFORD	LINCOLNSHIRE	-	-	296	Days
Days to Ripening	2002	ARRAN	FAKENHAM	NORFOLK	-	-	290	Days
Days to Ripening	2002	ARRAN	KINGSLYNN	NORFOLK	-	-	296	Days
Days to Ripening	2002	ARRAN	KETTG	NORTHAMPTONSHIRE	-	-	310	Days
Days to Ripening	2002	ARRAN	OLDM	ABERDEENSHIRE	-	-	348	Days
Days to Ripening	2002	ARRAN	WYMONDHAM	NORFOLK	-	-	310	Days
Days to Ripening	2002	ARRAN	SPALDING	LINCOLNSHIRE	-	-	287	Days
Days to Ripening	2002	ARRAN	OTLEY	SUFFOLK	-	-	301	Days
Days to Ripening	2002	ARRAN	ASHFD	KENT	-	-	310	Days
Days to Ripening	2002	ARRAN	TELFORD	SHROPSHIRE	-	-	314	Days
Days to Ripening	2002	ARRAN	WARMR	WILTSHIRE	-	-	310	Days
Days to Ripening	2002	ARRAN	COUPAR	PERTH AND KINROSS	-	-	327	Days
Days to Ripening	2002	ARRAN	WINCHESTER	HAMPSHIRE	-	-	309	Days
Days to Ripening	2002	ARRAN	WIMBOURNESTGILES	DORSET	-	-	292	Days
Days to Ripening	2002	ARRAN	ANNAN	DUMFRIES AND GALLOWAY	-	-	318	Days
Days to Ripening	2002	ARRAN	LIMAVADY	CAUSEWAY COAST AND GLENS	-	-	314	Days
Days to Ripening	2002	ARRAN	EDINB	CITY OF EDINBURGH	-	-	331	Days
Days to Ripening	2002	ARRAN	COLDSM	SCOTTISH BORDERS	-	-	321	Days
Days to Ripening	2002	ARRAN	CROFT-ON-TEES	NORTH YORKSHIRE	-	-	320	Days
Days to Ripening	2002	ARRAN	TADCASTER	NORTH YORKSHIRE	-	-	307	Days
Days to Ripening	2003	ARRAN	ABERDEEN	ABERDEENSHIRE	GRASS	SANDY CLAY LOAM	326	Days
Days to Ripening	2003	ARRAN	WORKSOP	NOTTINGHAMSHIRE	VEGETABLES	LIGHT SAND	310	Days
Days to Ripening	2003	ARRAN	WATERBEACH	CAMBRIDGESHIRE	PEAS	PEATY SOIL	281.3	Days
Days to Ripening	2003	ARRAN	FAKENHAM	NORFOLK	BEET	LIGHT SAND	284	Days
Days to Ripening	2003	ARRAN	ELGIN	MORAY	BARLEY	SANDY CLAY	320	Days
Days to Ripening	2003	ARRAN	WYMONDHAM	NORFOLK	WHEAT	MEDIUM	295	Days
Days to Ripening	2003	ARRAN	SPALDING	LINCOLNSHIRE	PEAS	DEEP FERTILE SILTY	280	Days
Days to Ripening	2003	ARRAN	CANTERBURY	KENT	OILSEED RAPE	DEEP FERTILE SILTY	310	Days
Days to Ripening	2003	ARRAN	MEMOW	LEICESTERSHIRE	OILSEED RAPE	DEEP CLAY	279.7	Days
Days to Ripening	2003	ARRAN	WINCHESTER	HAMPSHIRE	POPPY	MEDIUM	300	Days
Days to Ripening	2003	ARRAN	KINGSTON	DEVON	OAT	CLAY LOAM	305	Days
Days to Ripening	2003	ARRAN	LOCKERBIE	DUMFRIES AND GALLOWAY	BARLEY	LIGHT SAND	319	Days
Days to Ripening	2003	ARRAN	LIMAVADY	CAUSEWAY COAST AND GLENS	WHEAT	DEEP CLAY	314	Days
Days to Ripening	2003	ARRAN	HADDINGTON	EAST LOTHIAN	WHEAT	MEDIUM	310.3	Days
Days to Ripening	2003	ARRAN	DUNS	SCOTTISH BORDERS	OILSEED RAPE	DEEP CLAY	323.7	Days
Days to Ripening	2003	ARRAN	CROFT-ON-TEES	NORTH YORKSHIRE	POTATO	DEEP CLAY	316.3	Days
Days to Ripening	2003	ARRAN	TADCASTER	NORTH YORKSHIRE	POTATO	SHALLOW	307.7	Days
Days to Ripening	2006	BATTALION	WOLFERTON	NORFOLK	-	-	289	Days
Days to Ripening	2006	BATTALION	HUMBIE	EAST LOTHIAN	-	-	317	Days
Days to Ripening	2006	BATTALION	TELFORD	SHROPSHIRE	-	-	304	Days
Days to Ripening	2006	BATTALION	CRAMBE	NORTH YORKSHIRE	-	-	304	Days
Days to Ripening	2006	BATTALION	LIMAVADY	CAUSEWAY COAST AND GLENS	-	-	320.33	Days
Days to Ripening	2006	BATTALION	LAURENCEKIRK	ABERDEENSHIRE	-	-	324.67	Days
Days to Ripening	2006	BATTALION	ELGIN	MORAY	-	-	324	Days
Days to Ripening	2006	BATTALION	W-CHARLT	DEVON	-	-	303	Days
Days to Ripening	2006	BATTALION	RHYND	PERTH AND KINROSS	-	-	316.67	Days
Days to Ripening	2006	BATTALION	T-RAWSTN	DORSET	-	-	278.33	Days
Days to Ripening	2006	BATTALION	LOCKERBIE	DUMFRIES AND GALLOWAY	-	-	311.67	Days
Days to Ripening	2006	BATTALION	MORLEYSTBOTOLPH	NORFOLK	-	-	288	Days
Days to Ripening	2006	BATTALION	HYTHE	KENT	-	-	302.33	Days
Days to Ripening	2006	BATTALION	BOWSDN	NORTHUMBERLAND	-	-	315.67	Days
Days to Ripening	2006	BATTALION	RAGNALL	NOTTINGHAMSHIRE	-	-	301.67	Days
Days to Ripening	2006	BATTALION	HISTON	CAMBRIDGESHIRE	-	-	292	Days
Days to Ripening	2006	BATTALION	FRAMLINGHAM	SUFFOLK	-	-	300.33	Days
Days to Ripening	2006	BATTALION	FRISBYONTHEWREAKE	LEICESTERSHIRE	-	-	294.33	Days
Days to Ripening	2006	BATTALION	SPALDING	LINCOLNSHIRE	-	-	298	Days
Days to Ripening	2007	BATTALION	HISTON	CAMBRIDGESHIRE	-	-	294.67	Days
Days to Ripening	2007	BATTALION	HUMBIE	EAST LOTHIAN	-	-	335	Days
Days to Ripening	2007	BATTALION	RUDSTON	EAST RIDING OF YORKSHIRE	-	-	312	Days
Days to Ripening	2007	BATTALION	UPSOMBORNE	HAMPSHIRE	-	-	311.33	Days
Days to Ripening	2008	BATTALION	WOLFERTON	NORFOLK	-	-	299.33	Days
Days to Ripening	2008	BATTALION	DYCE	ABERDEENSHIRE	-	-	339	Days
Days to Ripening	2008	BATTALION	HYTHE	KENT	-	-	308.33	Days
Days to Ripening	2008	BATTALION	BOWSDN	NORTHUMBERLAND	-	-	315.33	Days
Days to Ripening	2008	BATTALION	WELBOURN	LINCOLNSHIRE	-	-	321.67	Days
Days to Ripening	2008	BATTALION	CAMBRIDGE	CAMBRIDGESHIRE	-	-	309.33	Days
Days to Ripening	2008	BATTALION	HUMBIE	EAST LOTHIAN	-	-	336	Days
Days to Ripening	2008	BATTALION	BUGTHORPE	NORTH YORKSHIRE	-	-	310.33	Days
Days to Ripening	2008	BATTALION	BURY-STE	SUFFOLK	-	-	293.33	Days
Days to Ripening	2008	BATTALION	LAURENCEKIRK	ABERDEENSHIRE	-	-	330.67	Days
Days to Ripening	2008	BATTALION	BINBROOK	NORTH LINCOLNSHIRE	-	-	323	Days
Days to Ripening	2009	BATTALION	CROFT-ON-TEES	NORTH YORKSHIRE	BEANS	MEDIUM	321.67	Days
Days to Ripening	2009	BATTALION	ULCEBY	NORTH LINCOLNSHIRE	OILSEED RAPE	D-CLAY	291	Days
Days to Ripening	2009	BATTALION	DYCE	ABERDEENSHIRE	BARLEY	L-SAND	329	Days
Days to Ripening	2009	BATTALION	HYTHE	KENT	OILSEED RAPE	D-CLAY	300.33	Days
Days to Ripening	2009	BATTALION	WELBOURN	LINCOLNSHIRE	OILSEED RAPE	SHALLOW	314	Days
Days to Ripening	2009	BATTALION	BEAUSALE	WARWICKSHIRE	OILSEED RAPE	D-CLAY	305	Days
Days to Ripening	2009	BATTALION	GIRTON	CAMBRIDGESHIRE	OTHER	MEDIUM	299.67	Days
Days to Ripening	2009	BATTALION	HOLBEACH	LINCOLNSHIRE	OTHER	D-SILT	282	Days
Days to Ripening	2009	BATTALION	RUDSTON	EAST RIDING OF YORKSHIRE	OILSEED RAPE	SHALLOW	302	Days
Days to Ripening	2009	BATTALION	WINCHESTER	HAMPSHIRE	PEAS	MEDIUM	292	Days
Days to Ripening	2009	BATTALION	FRAMLINGHAM	SUFFOLK	OILSEED RAPE	D-CLAY	294.33	Days
Days to Ripening	2009	BATTALION	LAURENCEKIRK	ABERDEENSHIRE	OILSEED RAPE	MEDIUM	345	Days
Days to Ripening	2010	BATTALION	CROFT-ON-TEES	NORTH YORKSHIRE	BEANS	MEDIUM	327.67	Days
Days to Ripening	2010	BATTALION	WELBOURN	LINCOLNSHIRE	OILSEED RAPE	SHALLOW	319.33	Days
Days to Ripening	2010	BATTALION	HASELY	WARWICKSHIRE	OILSEED RAPE	MEDIUM	305.67	Days
Days to Ripening	2010	BATTALION	GIRTON	CAMBRIDGESHIRE	BEANS	MEDIUM	295	Days
Days to Ripening	2010	BATTALION	HUMBIE	EAST LOTHIAN	GRASS	MEDIUM	332	Days
Days to Ripening	2010	BATTALION	CRAWLY	HAMPSHIRE	OAT	MEDIUM	296	Days
Days to Ripening	2015	BELGRADE	BARNSTON	ESSEX	WHEAT	D-CLAY	286.33	Days
Days to Ripening	2015	BELGRADE	LIMAVADY	CAUSEWAY COAST AND GLENS	OILSEED RAPE	MEDIUM	330	Days
Days to Ripening	2015	BELGRADE	ICKLETON	CAMBRIDGESHIRE	WHEAT	MEDIUM	296.33	Days
Days to Ripening	2015	BELGRADE	AUCHNAGATT	ABERDEENSHIRE	BARLEY	L-SAND	359.33	Days
Days to Ripening	2015	BELGRADE	ST-BOSW	SCOTTISH BORDERS	OILSEED RAPE	L-SAND	337.67	Days
Days to Ripening	2015	BELGRADE	BALGONIE	FIFE	OILSEED RAPE	L-SAND	344.33	Days
Days to Ripening	2015	BELGRADE	ALKERTON	OXFORDSHIRE	BEANS	L-SAND	311	Days
Days to Ripening	2015	BELGRADE	CAWOOD	NORTH YORKSHIRE	BEANS	MEDIUM	315	Days
Days to Ripening	2015	BELGRADE	ULCEBY	NORTH LINCOLNSHIRE	OILSEED RAPE	D-CLAY	321.33	Days
Days to Ripening	2015	BELGRADE	LUTHERMR	ABERDEENSHIRE	POTATO	MEDIUM	339.67	Days
Days to Ripening	2015	BELGRADE	WYE	KENT	BEANS	MEDIUM	275.67	Days
Days to Ripening	2015	BELGRADE	CROFT-ON-TEES	NORTH YORKSHIRE	BEANS	MEDIUM	333	Days
Days to Ripening	2015	BELGRADE	ELMSWELL	SUFFOLK	OILSEED RAPE	MEDIUM	334	Days
Days to Ripening	2015	BELGRADE	WELBOURN	LINCOLNSHIRE	BARLEY	SHALLOW	321.33	Days
Days to Ripening	2015	BELGRADE	HUMBIE	EAST LOTHIAN	OILSEED RAPE	MEDIUM	347.33	Days
Days to Ripening	2015	BELGRADE	HLEGH	CHESHIRE EAST	WHEAT	MEDIUM	319	Days
Days to Ripening	2015	BELGRADE	BEDFIELD	SUFFOLK	BEANS	D-CLAY	309.33	Days
Days to Ripening	2015	BELGRADE	FRISBYONTHEWREAKE	LEICESTERSHIRE	OILSEED RAPE	D-CLAY	304	Days
Days to Ripening	2015	BELGRADE	MORLEYSTBOTOLPH	NORFOLK	OILSEED RAPE	MEDIUM	302	Days
Days to Ripening	2016	BELGRADE	THAXTED	ESSEX	OILSEED RAPE	D-CLAY	289.67	Days
Days to Ripening	2016	BELGRADE	LIMAVADY	CAUSEWAY COAST AND GLENS	POTATO	D-SILT	313	Days
Days to Ripening	2016	BELGRADE	ICKLETON	CAMBRIDGESHIRE	WHEAT	MEDIUM	297.33	Days
Days to Ripening	2016	BELGRADE	AUCHNAGATT	ABERDEENSHIRE	BARLEY	L-SAND	350.67	Days
Days to Ripening	2016	BELGRADE	ST-BOSW	SCOTTISH BORDERS	POTATO	L-SAND	340.33	Days
Days to Ripening	2016	BELGRADE	BALGONIE	FIFE	OAT	L-SAND	334	Days
Days to Ripening	2016	BELGRADE	ALKERTON	OXFORDSHIRE	BEANS	MEDIUM	305	Days
Days to Ripening	2016	BELGRADE	CAWOOD	NORTH YORKSHIRE	BEANS	MEDIUM	310	Days
Days to Ripening	2016	BELGRADE	ULCEBY	NORTH LINCOLNSHIRE	OILSEED RAPE	D-CLAY	314.67	Days
Days to Ripening	2016	BELGRADE	BRECHIN	ANGUS	OILSEED RAPE	MEDIUM	342.33	Days
Days to Ripening	2016	BELGRADE	PETHAM	KENT	BEANS	MEDIUM	304.33	Days
Days to Ripening	2016	BELGRADE	ELMSWELL	SUFFOLK	OILSEED RAPE	MEDIUM	318.33	Days
Days to Ripening	2016	BELGRADE	WELBOURN	LINCOLNSHIRE	OILSEED RAPE	SHALLOW	320	Days
Days to Ripening	2016	BELGRADE	BAINTON	EAST RIDING OF YORKSHIRE	OILSEED RAPE	MEDIUM	312	Days
Days to Ripening	2016	BELGRADE	PINCHBECK	LINCOLNSHIRE	POTATO	D-SILT	294	Days
Days to Ripening	2016	BELGRADE	HUMBIE	EAST LOTHIAN	OILSEED RAPE	MEDIUM	343	Days
Days to Ripening	2016	BELGRADE	TIBTHORPE	EAST RIDING OF YORKSHIRE	OILSEED RAPE	MEDIUM	322.33	Days
Days to Ripening	2016	BELGRADE	HLEGH	CHESHIRE EAST	WHEAT	MEDIUM	303.67	Days
Days to Ripening	2016	BELGRADE	FRISBYONTHEWREAKE	LEICESTERSHIRE	OILSEED RAPE	D-CLAY	307.67	Days
Days to Ripening	2017	BELGRADE	THAXTED	ESSEX	OILSEED RAPE	D-CLAY	273.33	Days
Days to Ripening	2017	BELGRADE	CALLOW	HEREFORDSHIRE	COUNTY OF	OILSEED RAPE	311	Days
Days to Ripening	2017	BELGRADE	COWBRIDGE	VALE OF GLAMORGAN	OILSEED RAPE	MEDIUM	296.33	Days
Days to Ripening	2017	BELGRADE	FRIDAYTHORPE	NORTH YORKSHIRE	PEAS	SHALLOW	318	Days
Days to Ripening	2017	BELGRADE	EASTMLLNG	KENT	OAT	MEDIUM	269	Days
Days to Ripening	2017	BELGRADE	DEOPHAM	NORFOLK	PEAS	MEDIUM	307	Days
Days to Ripening	2017	BELGRADE	LIMAVADY	CAUSEWAY COAST AND GLENS	OILSEED RAPE	MEDIUM	292.33	Days
Days to Ripening	2017	BELGRADE	ICKLETON	CAMBRIDGESHIRE	WHEAT	MEDIUM	278	Days
Days to Ripening	2017	BELGRADE	ULCEBY	NORTH LINCOLNSHIRE	OILSEED RAPE	D-CLAY	285	Days
Days to Ripening	2017	BELGRADE	CROFT-ON-TEES	NORTH YORKSHIRE	OILSEED RAPE	MEDIUM	322.67	Days
Days to Ripening	2017	BELGRADE	HLEGH	CHESHIRE EAST	WHEAT	MEDIUM	299	Days
Days to Ripening	2017	BELGRADE	WELBOURN	LINCOLNSHIRE	OILSEED RAPE	SHALLOW	314	Days
Days to Ripening	2017	BELGRADE	SPALDING	LINCOLNSHIRE	PEAS	D-SILT	286	Days
Days to Ripening	2017	BELGRADE	FRSTHRP	LINCOLNSHIRE	OILSEED RAPE	D-CLAY	302	Days
Days to Ripening	2017	BELGRADE	NORTHDALTON	EAST RIDING OF YORKSHIRE	OILSEED RAPE	MEDIUM	318	Days
Days to Ripening	2017	BELGRADE	EDGMOND	SHROPSHIRE	OILSEED RAPE	MEDIUM	291	Days
Days to Ripening	2009	BELUGA	CROFT-ON-TEES	NORTH YORKSHIRE	BEANS	MEDIUM	322.33	Days
Days to Ripening	2009	BELUGA	DYCE	ABERDEENSHIRE	BARLEY	L-SAND	329.67	Days
Days to Ripening	2009	BELUGA	WELBOURN	LINCOLNSHIRE	OILSEED RAPE	SHALLOW	316	Days
Days to Ripening	2009	BELUGA	BEAUSALE	WARWICKSHIRE	OILSEED RAPE	D-CLAY	304.67	Days
Days to Ripening	2009	BELUGA	GIRTON	CAMBRIDGESHIRE	OTHER	MEDIUM	297.67	Days
Days to Ripening	2009	BELUGA	RUDSTON	EAST RIDING OF YORKSHIRE	OILSEED RAPE	SHALLOW	306.33	Days
Days to Ripening	2009	BELUGA	WINCHESTER	HAMPSHIRE	PEAS	MEDIUM	293.33	Days
Days to Ripening	2009	BELUGA	LAURENCEKIRK	ABERDEENSHIRE	OILSEED RAPE	MEDIUM	347	Days
Days to Ripening	2010	BELUGA	CROFT-ON-TEES	NORTH YORKSHIRE	BEANS	MEDIUM	330.33	Days
Days to Ripening	2010	BELUGA	C-CREEVY	BELFAST	BARLEY	MEDIUM	324.33	Days
Days to Ripening	2010	BELUGA	LAURENCEKIRK	ABERDEENSHIRE	OILSEED RAPE	MEDIUM	342	Days
Days to Ripening	2010	BELUGA	ELLON	ABERDEENSHIRE	BARLEY	L-SAND	343.67	Days
Days to Ripening	2010	BELUGA	WELBOURN	LINCOLNSHIRE	OILSEED RAPE	SHALLOW	319.33	Days
Days to Ripening	2010	BELUGA	HASELY	WARWICKSHIRE	OILSEED RAPE	MEDIUM	305	Days
Days to Ripening	2010	BELUGA	GIRTON	CAMBRIDGESHIRE	BEANS	MEDIUM	298.33	Days
Days to Ripening	2010	BELUGA	HUMBIE	EAST LOTHIAN	GRASS	MEDIUM	330.33	Days
Days to Ripening	2010	BELUGA	CRAWLY	HAMPSHIRE	OAT	MEDIUM	293.67	Days
Days to Ripening	2012	BELUGA	CROFT-ON-TEES	NORTH YORKSHIRE	-	-	329.67	Days
Days to Ripening	2012	BELUGA	ELLON	ABERDEENSHIRE	-	-	341	Days
Days to Ripening	2012	BELUGA	ST-BOSW	SCOTTISH BORDERS	-	-	343.67	Days
Days to Ripening	2012	BELUGA	BALGONIE	FIFE	-	-	345.67	Days
Days to Ripening	2012	BELUGA	STCHWRTH	CAMBRIDGESHIRE	-	-	299	Days
Days to Ripening	2012	BELUGA	ULCEBY	NORTH LINCOLNSHIRE	-	-	320	Days
Days to Ripening	2012	BELUGA	LUTHERMR	ABERDEENSHIRE	-	-	337	Days
Days to Ripening	2012	BELUGA	PETHAM	KENT	-	-	307	Days
Days to Ripening	2012	BELUGA	WELBOURN	LINCOLNSHIRE	-	-	324.33	Days
Days to Ripening	2012	BELUGA	HUMBIE	EAST LOTHIAN	-	-	347.33	Days
Days to Ripening	2012	BELUGA	HINSTOCK	SHROPSHIRE	-	-	319.67	Days
Days to Ripening	2012	BELUGA	LYMM	CHESHIRE EAST	-	-	312.67	Days
Days to Ripening	2012	BELUGA	BARTHORPE	NORTH YORKSHIRE	-	-	320.33	Days
Days to Ripening	2012	BELUGA	FRAMLINGHAM	SUFFOLK	-	-	318	Days
Days to Ripening	2012	BELUGA	ATTLEBRO	NORFOLK	-	-	282	Days
Days to Ripening	2012	BELUGA	ICKLETON	CAMBRIDGESHIRE	-	-	302	Days
Days to Ripening	2013	BELUGA	LUTHERMR	ABERDEENSHIRE	WHEAT	MEDIUM	288.33	Days
Days to Ripening	2013	BELUGA	WELBOURN	LINCOLNSHIRE	BARLEY	SHALLOW	316	Days
Days to Ripening	2013	BELUGA	EDGMOND	SHROPSHIRE	OAT	L-SAND	302	Days
Days to Ripening	2013	BELUGA	ELLON	ABERDEENSHIRE	BARLEY	L-SAND	327.33	Days
Days to Ripening	2013	BELUGA	ST-BOSW	SCOTTISH BORDERS	POTATO	L-SAND	320.67	Days
Days to Ripening	2013	BELUGA	BALGONIE	FIFE	OAT	L-SAND	317.67	Days
Days to Ripening	2013	BELUGA	ALKERTON	OXFORDSHIRE	BARLEY	L-SAND	323	Days
Days to Ripening	2014	BELUGA	CROFT-ON-TEES	NORTH YORKSHIRE	BEANS	MEDIUM	316.67	Days
Days to Ripening	2014	BELUGA	MORLEYSTBOTOLPH	NORFOLK	OILSEED RAPE	MEDIUM	296	Days
Days to Ripening	2014	BELUGA	AUCHNAGATT	ABERDEENSHIRE	WHEAT	L-SAND	339.33	Days
Days to Ripening	2014	BELUGA	ST-BOSW	SCOTTISH BORDERS	POTATO	L-SAND	320.33	Days
Days to Ripening	2014	BELUGA	BALGONIE	FIFE	OILSEED RAPE	L-SAND	330	Days
Days to Ripening	2014	BELUGA	ALKERTON	OXFORDSHIRE	BEANS	L-SAND	311	Days
Days to Ripening	2014	BELUGA	LUTHERMR	ABERDEENSHIRE	POTATO	MEDIUM	308.67	Days
Days to Ripening	2014	BELUGA	WELBOURN	LINCOLNSHIRE	BARLEY	SHALLOW	304	Days
Days to Ripening	2014	BELUGA	EDGMOND	SHROPSHIRE	GRASS	MEDIUM	307.67	Days
Days to Ripening	2014	BELUGA	SANCTON	EAST RIDING OF YORKSHIRE	OILSEED RAPE	MEDIUM	304.33	Days
Days to Ripening	2016	BENNINGTON	THAXTED	ESSEX	OILSEED RAPE	D-CLAY	296.67	Days
Days to Ripening	2016	BENNINGTON	LIMAVADY	CAUSEWAY COAST AND GLENS	POTATO	D-SILT	309.33	Days
Days to Ripening	2016	BENNINGTON	ICKLETON	CAMBRIDGESHIRE	WHEAT	MEDIUM	299	Days
Days to Ripening	2016	BENNINGTON	AUCHNAGATT	ABERDEENSHIRE	BARLEY	L-SAND	350.67	Days
Days to Ripening	2016	BENNINGTON	ST-BOSW	SCOTTISH BORDERS	POTATO	L-SAND	341	Days
Days to Ripening	2016	BENNINGTON	BALGONIE	FIFE	OAT	L-SAND	334.67	Days
Days to Ripening	2016	BENNINGTON	ALKERTON	OXFORDSHIRE	BEANS	MEDIUM	305	Days
Days to Ripening	2016	BENNINGTON	CAWOOD	NORTH YORKSHIRE	BEANS	MEDIUM	312	Days
Days to Ripening	2016	BENNINGTON	ULCEBY	NORTH LINCOLNSHIRE	OILSEED RAPE	D-CLAY	315.33	Days
Days to Ripening	2016	BENNINGTON	BRECHIN	ANGUS	OILSEED RAPE	MEDIUM	341	Days
Days to Ripening	2016	BENNINGTON	PETHAM	KENT	BEANS	MEDIUM	308.33	Days
Days to Ripening	2016	BENNINGTON	ELMSWELL	SUFFOLK	OILSEED RAPE	MEDIUM	320.67	Days
Days to Ripening	2016	BENNINGTON	WELBOURN	LINCOLNSHIRE	OILSEED RAPE	SHALLOW	317.33	Days
Days to Ripening	2016	BENNINGTON	BAINTON	EAST RIDING OF YORKSHIRE	OILSEED RAPE	MEDIUM	312	Days
Days to Ripening	2016	BENNINGTON	PINCHBECK	LINCOLNSHIRE	POTATO	D-SILT	296.67	Days
Days to Ripening	2016	BENNINGTON	HUMBIE	EAST LOTHIAN	OILSEED RAPE	MEDIUM	346	Days
Days to Ripening	2016	BENNINGTON	TIBTHORPE	EAST RIDING OF YORKSHIRE	OILSEED RAPE	MEDIUM	325	Days
Days to Ripening	2016	BENNINGTON	HLEGH	CHESHIRE EAST	WHEAT	MEDIUM	305.67	Days
Days to Ripening	2016	BENNINGTON	FRISBYONTHEWREAKE	LEICESTERSHIRE	OILSEED RAPE	D-CLAY	309.67	Days
Days to Ripening	2017	BENNINGTON	THAXTED	ESSEX	OILSEED RAPE	D-CLAY	274	Days
Days to Ripening	2017	BENNINGTON	CALLOW	HEREFORDSHIRE	COUNTY OF	OILSEED RAPE	315	Days
Days to Ripening	2017	BENNINGTON	COWBRIDGE	VALE OF GLAMORGAN	OILSEED RAPE	MEDIUM	302	Days
Days to Ripening	2017	BENNINGTON	FRIDAYTHORPE	NORTH YORKSHIRE	PEAS	SHALLOW	319	Days
Days to Ripening	2017	BENNINGTON	EASTMLLNG	KENT	OAT	MEDIUM	273	Days
Days to Ripening	2017	BENNINGTON	DEOPHAM	NORFOLK	PEAS	MEDIUM	306.33	Days
Days to Ripening	2017	BENNINGTON	LIMAVADY	CAUSEWAY COAST AND GLENS	OILSEED RAPE	MEDIUM	295.67	Days
Days to Ripening	2017	BENNINGTON	ICKLETON	CAMBRIDGESHIRE	WHEAT	MEDIUM	280.67	Days
Days to Ripening	2017	BENNINGTON	BALGONIE	FIFE	OAT	L-SAND	333.67	Days
Days to Ripening	2017	BENNINGTON	KELSO	SCOTTISH BORDERS	POTATO	L-SAND	323.67	Days
Days to Ripening	2017	BENNINGTON	ULCEBY	NORTH LINCOLNSHIRE	OILSEED RAPE	D-CLAY	286	Days
Days to Ripening	2017	BENNINGTON	CROFT-ON-TEES	NORTH YORKSHIRE	OILSEED RAPE	MEDIUM	325.33	Days
Days to Ripening	2017	BENNINGTON	BRECHIN	ANGUS	OILSEED RAPE	MEDIUM	340.67	Days
Days to Ripening	2017	BENNINGTON	ELGIN	MORAY	POTATO	L-SAND	313.33	Days
Days to Ripening	2017	BENNINGTON	HLEGH	CHESHIRE EAST	WHEAT	MEDIUM	299.67	Days
Days to Ripening	2017	BENNINGTON	WELBOURN	LINCOLNSHIRE	OILSEED RAPE	SHALLOW	314.67	Days
Days to Ripening	2017	BENNINGTON	BURDON	SUNDERLAND	OILSEED RAPE	MEDIUM	322.33	Days
Days to Ripening	2017	BENNINGTON	SPALDING	LINCOLNSHIRE	PEAS	D-SILT	294	Days
Days to Ripening	2017	BENNINGTON	SALTOUN	EAST LOTHIAN	OILSEED RAPE	MEDIUM	344	Days
Days to Ripening	2017	BENNINGTON	FRSTHRP	LINCOLNSHIRE	OILSEED RAPE	D-CLAY	300	Days
Days to Ripening	2017	BENNINGTON	NORTHDALTON	EAST RIDING OF YORKSHIRE	OILSEED RAPE	MEDIUM	319.33	Days
Days to Ripening	2017	BENNINGTON	EDGMOND	SHROPSHIRE	OILSEED RAPE	MEDIUM	291.67	Days
Days to Ripening	2003	BENTLEY	ABERDEEN	ABERDEENSHIRE	GRASS	SANDY CLAY LOAM	327	Days
Days to Ripening	2003	BENTLEY	WORKSOP	NOTTINGHAMSHIRE	VEGETABLES	LIGHT SAND	308.7	Days
Days to Ripening	2003	BENTLEY	WATERBEACH	CAMBRIDGESHIRE	PEAS	PEATY SOIL	278.7	Days
Days to Ripening	2003	BENTLEY	FAKENHAM	NORFOLK	BEET	LIGHT SAND	278	Days
Days to Ripening	2003	BENTLEY	ELGIN	MORAY	BARLEY	SANDY CLAY	316.7	Days
Days to Ripening	2003	BENTLEY	WYMONDHAM	NORFOLK	WHEAT	MEDIUM	296.3	Days
Days to Ripening	2003	BENTLEY	SPALDING	LINCOLNSHIRE	PEAS	DEEP FERTILE SILTY	280	Days
Days to Ripening	2003	BENTLEY	CANTERBURY	KENT	OILSEED RAPE	DEEP FERTILE SILTY	312	Days
Days to Ripening	2003	BENTLEY	MEMOW	LEICESTERSHIRE	OILSEED RAPE	DEEP CLAY	278.3	Days
Days to Ripening	2003	BENTLEY	WINCHESTER	HAMPSHIRE	POPPY	MEDIUM	304	Days
Days to Ripening	2003	BENTLEY	KINGSTON	DEVON	OAT	CLAY LOAM	305.7	Days
Days to Ripening	2003	BENTLEY	LOCKERBIE	DUMFRIES AND GALLOWAY	BARLEY	LIGHT SAND	319.3	Days
Days to Ripening	2003	BENTLEY	LIMAVADY	CAUSEWAY COAST AND GLENS	WHEAT	DEEP CLAY	314	Days
Days to Ripening	2003	BENTLEY	HADDINGTON	EAST LOTHIAN	WHEAT	MEDIUM	313	Days
Days to Ripening	2003	BENTLEY	DUNS	SCOTTISH BORDERS	OILSEED RAPE	DEEP CLAY	323	Days
Days to Ripening	2003	BENTLEY	CROFT-ON-TEES	NORTH YORKSHIRE	POTATO	DEEP CLAY	314.3	Days
Days to Ripening	2003	BENTLEY	TADCASTER	NORTH YORKSHIRE	POTATO	SHALLOW	304	Days
Days to Ripening	2004	BENTLEY	LAURENCEKIRK	ABERDEENSHIRE	OILSEED RAPE	MEDIUM	342	Days
Days to Ripening	2004	BENTLEY	RAGNALL	NOTTINGHAMSHIRE	OILSEED RAPE	MEDIUM	327.7	Days
Days to Ripening	2004	BENTLEY	WATERBEACH	CAMBRIDGESHIRE	BEANS	ORGANIC	287	Days
Days to Ripening	2004	BENTLEY	WOLFERTON	NORFOLK	BEANS	DEEP CLAY	305.3	Days
Days to Ripening	2004	BENTLEY	GIRTON	CAMBRIDGESHIRE	BEANS	DEEP CLAY	302.7	Days
Days to Ripening	2004	BENTLEY	WYE	KENT	OILSEED RAPE	MEDIUM	323.3	Days
Days to Ripening	2004	BENTLEY	FRISBYONTHEWREAKE	LEICESTERSHIRE	PEAS	DEEP CLAY	307.7	Days
Days to Ripening	2004	BENTLEY	COATES	GLOUCESTERSHIRE	WHEAT	SHALLOW	298.3	Days
Days to Ripening	2004	BENTLEY	WARWICK	WARWICKSHIRE	WHEAT	DEEP CLAY	305.3	Days
Days to Ripening	2004	BENTLEY	UPSOMBORNE	HAMPSHIRE	PEAS	MEDIUM	315	Days
Days to Ripening	2004	BENTLEY	LIMAVADY	CAUSEWAY COAST AND GLENS	WHEAT	DEEP CLAY	327	Days
Days to Ripening	2004	BENTLEY	HUMBIE	EAST LOTHIAN	WHEAT	MEDIUM	331	Days
Days to Ripening	2004	BENTLEY	BOWSDN	NORTHUMBERLAND	WHEAT	DEEP CLAY	329.5	Days
Days to Ripening	2004	BENTLEY	BRAMHAM	LEEDS	OILSEED RAPE	MEDIUM	311	Days
Days to Ripening	2002	BISCAY	WORKSOP	NOTTINGHAMSHIRE	-	-	300	Days
Days to Ripening	2002	BISCAY	SLEAFORD	LINCOLNSHIRE	-	-	292	Days
Days to Ripening	2002	BISCAY	FAKENHAM	NORFOLK	-	-	289	Days
Days to Ripening	2002	BISCAY	KINGSLYNN	NORFOLK	-	-	295	Days
Days to Ripening	2002	BISCAY	KETTG	NORTHAMPTONSHIRE	-	-	306	Days
Days to Ripening	2002	BISCAY	OLDM	ABERDEENSHIRE	-	-	341	Days
Days to Ripening	2002	BISCAY	WYMONDHAM	NORFOLK	-	-	306	Days
Days to Ripening	2002	BISCAY	SPALDING	LINCOLNSHIRE	-	-	286	Days
Days to Ripening	2002	BISCAY	OTLEY	SUFFOLK	-	-	301	Days
Days to Ripening	2002	BISCAY	ASHFD	KENT	-	-	311	Days
Days to Ripening	2002	BISCAY	TELFORD	SHROPSHIRE	-	-	314	Days
Days to Ripening	2002	BISCAY	WARMR	WILTSHIRE	-	-	316	Days
Days to Ripening	2002	BISCAY	COUPAR	PERTH AND KINROSS	-	-	326	Days
Days to Ripening	2002	BISCAY	WINCHESTER	HAMPSHIRE	-	-	310	Days
Days to Ripening	2002	BISCAY	WIMBOURNESTGILES	DORSET	-	-	294	Days
Days to Ripening	2002	BISCAY	ANNAN	DUMFRIES AND GALLOWAY	-	-	315	Days
Days to Ripening	2002	BISCAY	LIMAVADY	CAUSEWAY COAST AND GLENS	-	-	315	Days
Days to Ripening	2002	BISCAY	EDINB	CITY OF EDINBURGH	-	-	328	Days
Days to Ripening	2002	BISCAY	COLDSM	SCOTTISH BORDERS	-	-	320	Days
Days to Ripening	2002	BISCAY	CROFT-ON-TEES	NORTH YORKSHIRE	-	-	320	Days
Days to Ripening	2002	BISCAY	TADCASTER	NORTH YORKSHIRE	-	-	304	Days
Days to Ripening	2003	BISCAY	ABERDEEN	ABERDEENSHIRE	GRASS	SANDY CLAY LOAM	326.3	Days
Days to Ripening	2003	BISCAY	WORKSOP	NOTTINGHAMSHIRE	VEGETABLES	LIGHT SAND	306.7	Days
Days to Ripening	2003	BISCAY	WATERBEACH	CAMBRIDGESHIRE	PEAS	PEATY SOIL	275.3	Days
Days to Ripening	2003	BISCAY	FAKENHAM	NORFOLK	BEET	LIGHT SAND	283.3	Days
Days to Ripening	2003	BISCAY	ELGIN	MORAY	BARLEY	SANDY CLAY	317.3	Days
Days to Ripening	2003	BISCAY	WYMONDHAM	NORFOLK	WHEAT	MEDIUM	290	Days
Days to Ripening	2003	BISCAY	SPALDING	LINCOLNSHIRE	PEAS	DEEP FERTILE SILTY	277.3	Days
Days to Ripening	2003	BISCAY	CANTERBURY	KENT	OILSEED RAPE	DEEP FERTILE SILTY	310	Days
Days to Ripening	2003	BISCAY	MEMOW	LEICESTERSHIRE	OILSEED RAPE	DEEP CLAY	276.7	Days
Days to Ripening	2003	BISCAY	WINCHESTER	HAMPSHIRE	POPPY	MEDIUM	302	Days
Days to Ripening	2003	BISCAY	KINGSTON	DEVON	OAT	CLAY LOAM	301.7	Days
Days to Ripening	2003	BISCAY	LOCKERBIE	DUMFRIES AND GALLOWAY	BARLEY	LIGHT SAND	316.7	Days
Days to Ripening	2003	BISCAY	LIMAVADY	CAUSEWAY COAST AND GLENS	WHEAT	DEEP CLAY	314	Days
Days to Ripening	2003	BISCAY	HADDINGTON	EAST LOTHIAN	WHEAT	MEDIUM	310	Days
Days to Ripening	2003	BISCAY	DUNS	SCOTTISH BORDERS	OILSEED RAPE	DEEP CLAY	321.7	Days
Days to Ripening	2003	BISCAY	CROFT-ON-TEES	NORTH YORKSHIRE	POTATO	DEEP CLAY	317	Days
Days to Ripening	2003	BISCAY	TADCASTER	NORTH YORKSHIRE	POTATO	SHALLOW	306.3	Days
Days to Ripening	2014	BRITANNIA	CROFT-ON-TEES	NORTH YORKSHIRE	BEANS	MEDIUM	318	Days
Days to Ripening	2014	BRITANNIA	MORLEYSTBOTOLPH	NORFOLK	OILSEED RAPE	MEDIUM	296	Days
Days to Ripening	2014	BRITANNIA	ICKLETON	CAMBRIDGESHIRE	WHEAT	MEDIUM	292	Days
Days to Ripening	2014	BRITANNIA	AUCHNAGATT	ABERDEENSHIRE	WHEAT	L-SAND	340	Days
Days to Ripening	2014	BRITANNIA	ST-BOSW	SCOTTISH BORDERS	POTATO	L-SAND	323	Days
Days to Ripening	2014	BRITANNIA	BALGONIE	FIFE	OILSEED RAPE	L-SAND	332	Days
Days to Ripening	2014	BRITANNIA	ALKERTON	OXFORDSHIRE	BEANS	L-SAND	311.67	Days
Days to Ripening	2014	BRITANNIA	ULCEBY	NORTH LINCOLNSHIRE	OILSEED RAPE	D-CLAY	312.67	Days
Days to Ripening	2014	BRITANNIA	LUTHERMR	ABERDEENSHIRE	POTATO	MEDIUM	312.67	Days
Days to Ripening	2014	BRITANNIA	PETHAM	KENT	OAT	MEDIUM	287.67	Days
Days to Ripening	2014	BRITANNIA	WELBOURN	LINCOLNSHIRE	BARLEY	SHALLOW	304.33	Days
Days to Ripening	2014	BRITANNIA	MOULTON	LINCOLNSHIRE	VEGETABLES	D-SILT	300	Days
Days to Ripening	2014	BRITANNIA	HLEGH	CHESHIRE EAST	WHEAT	MEDIUM	309.33	Days
Days to Ripening	2014	BRITANNIA	EDGMOND	SHROPSHIRE	GRASS	MEDIUM	307.67	Days
Days to Ripening	2014	BRITANNIA	BARTHORPE	NORTH YORKSHIRE	OILSEED RAPE	D-CLAY	309	Days
Days to Ripening	2014	BRITANNIA	SANCTON	EAST RIDING OF YORKSHIRE	OILSEED RAPE	MEDIUM	305	Days
Days to Ripening	2014	BRITANNIA	BEDFIELD	SUFFOLK	OILSEED RAPE	D-CLAY	301	Days
Days to Ripening	2014	BRITANNIA	FRISBYONTHEWREAKE	LEICESTERSHIRE	OILSEED RAPE	D-CLAY	300.33	Days
Days to Ripening	2015	BRITANNIA	BARNSTON	ESSEX	WHEAT	D-CLAY	286.67	Days
Days to Ripening	2015	BRITANNIA	LIMAVADY	CAUSEWAY COAST AND GLENS	OILSEED RAPE	MEDIUM	332	Days
Days to Ripening	2015	BRITANNIA	ICKLETON	CAMBRIDGESHIRE	WHEAT	MEDIUM	298.33	Days
Days to Ripening	2015	BRITANNIA	ST-BOSW	SCOTTISH BORDERS	OILSEED RAPE	L-SAND	337	Days
Days to Ripening	2015	BRITANNIA	BALGONIE	FIFE	OILSEED RAPE	L-SAND	345	Days
Days to Ripening	2015	BRITANNIA	ALKERTON	OXFORDSHIRE	BEANS	L-SAND	313	Days
Days to Ripening	2015	BRITANNIA	CAWOOD	NORTH YORKSHIRE	BEANS	MEDIUM	318	Days
Days to Ripening	2015	BRITANNIA	ULCEBY	NORTH LINCOLNSHIRE	OILSEED RAPE	D-CLAY	324	Days
Days to Ripening	2015	BRITANNIA	LUTHERMR	ABERDEENSHIRE	POTATO	MEDIUM	341.67	Days
Days to Ripening	2015	BRITANNIA	WYE	KENT	BEANS	MEDIUM	281	Days
Days to Ripening	2015	BRITANNIA	CROFT-ON-TEES	NORTH YORKSHIRE	BEANS	MEDIUM	336.33	Days
Days to Ripening	2015	BRITANNIA	ELMSWELL	SUFFOLK	OILSEED RAPE	MEDIUM	333.33	Days
Days to Ripening	2015	BRITANNIA	WELBOURN	LINCOLNSHIRE	BARLEY	SHALLOW	321.33	Days
Days to Ripening	2015	BRITANNIA	HUMBIE	EAST LOTHIAN	OILSEED RAPE	MEDIUM	350.33	Days
Days to Ripening	2015	BRITANNIA	HLEGH	CHESHIRE EAST	WHEAT	MEDIUM	319.67	Days
Days to Ripening	2015	BRITANNIA	BEDFIELD	SUFFOLK	BEANS	D-CLAY	311.67	Days
Days to Ripening	2015	BRITANNIA	FRISBYONTHEWREAKE	LEICESTERSHIRE	OILSEED RAPE	D-CLAY	306	Days
Days to Ripening	2015	BRITANNIA	MORLEYSTBOTOLPH	NORFOLK	OILSEED RAPE	MEDIUM	304	Days
Days to Ripening	2016	BRITANNIA	THAXTED	ESSEX	OILSEED RAPE	D-CLAY	293.33	Days
Days to Ripening	2016	BRITANNIA	LIMAVADY	CAUSEWAY COAST AND GLENS	POTATO	D-SILT	314.33	Days
Days to Ripening	2016	BRITANNIA	ICKLETON	CAMBRIDGESHIRE	WHEAT	MEDIUM	299	Days
Days to Ripening	2016	BRITANNIA	AUCHNAGATT	ABERDEENSHIRE	BARLEY	L-SAND	349.33	Days
Days to Ripening	2016	BRITANNIA	ST-BOSW	SCOTTISH BORDERS	POTATO	L-SAND	340.33	Days
Days to Ripening	2016	BRITANNIA	BALGONIE	FIFE	OAT	L-SAND	336	Days
Days to Ripening	2016	BRITANNIA	ALKERTON	OXFORDSHIRE	BEANS	MEDIUM	305	Days
Days to Ripening	2016	BRITANNIA	CAWOOD	NORTH YORKSHIRE	BEANS	MEDIUM	310	Days
Days to Ripening	2016	BRITANNIA	ULCEBY	NORTH LINCOLNSHIRE	OILSEED RAPE	D-CLAY	315	Days
Days to Ripening	2016	BRITANNIA	BRECHIN	ANGUS	OILSEED RAPE	MEDIUM	342.33	Days
Days to Ripening	2016	BRITANNIA	PETHAM	KENT	BEANS	MEDIUM	305.67	Days
Days to Ripening	2016	BRITANNIA	ELMSWELL	SUFFOLK	OILSEED RAPE	MEDIUM	319.67	Days
Days to Ripening	2016	BRITANNIA	WELBOURN	LINCOLNSHIRE	OILSEED RAPE	SHALLOW	317.67	Days
Days to Ripening	2016	BRITANNIA	BAINTON	EAST RIDING OF YORKSHIRE	OILSEED RAPE	MEDIUM	317	Days
Days to Ripening	2016	BRITANNIA	PINCHBECK	LINCOLNSHIRE	POTATO	D-SILT	296	Days
Days to Ripening	2016	BRITANNIA	HUMBIE	EAST LOTHIAN	OILSEED RAPE	MEDIUM	343.67	Days
Days to Ripening	2016	BRITANNIA	TIBTHORPE	EAST RIDING OF YORKSHIRE	OILSEED RAPE	MEDIUM	324.33	Days
Days to Ripening	2016	BRITANNIA	HLEGH	CHESHIRE EAST	WHEAT	MEDIUM	303	Days
Days to Ripening	2016	BRITANNIA	FRISBYONTHEWREAKE	LEICESTERSHIRE	OILSEED RAPE	D-CLAY	310.67	Days
Days to Ripening	2004	BROMPTON	LAURENCEKIRK	ABERDEENSHIRE	OILSEED RAPE	MEDIUM	344	Days
Days to Ripening	2004	BROMPTON	RAGNALL	NOTTINGHAMSHIRE	OILSEED RAPE	MEDIUM	325	Days
Days to Ripening	2004	BROMPTON	WATERBEACH	CAMBRIDGESHIRE	BEANS	ORGANIC	285.7	Days
Days to Ripening	2004	BROMPTON	WOLFERTON	NORFOLK	BEANS	DEEP CLAY	305	Days
Days to Ripening	2004	BROMPTON	GIRTON	CAMBRIDGESHIRE	BEANS	DEEP CLAY	301.3	Days
Days to Ripening	2004	BROMPTON	WYE	KENT	OILSEED RAPE	MEDIUM	320.7	Days
Days to Ripening	2004	BROMPTON	FRISBYONTHEWREAKE	LEICESTERSHIRE	PEAS	DEEP CLAY	302.3	Days
Days to Ripening	2004	BROMPTON	COATES	GLOUCESTERSHIRE	WHEAT	SHALLOW	297	Days
Days to Ripening	2004	BROMPTON	WARWICK	WARWICKSHIRE	WHEAT	DEEP CLAY	306	Days
Days to Ripening	2004	BROMPTON	UPSOMBORNE	HAMPSHIRE	PEAS	MEDIUM	314	Days
Days to Ripening	2004	BROMPTON	LIMAVADY	CAUSEWAY COAST AND GLENS	WHEAT	DEEP CLAY	327	Days
Days to Ripening	2004	BROMPTON	HUMBIE	EAST LOTHIAN	WHEAT	MEDIUM	330.3	Days
Days to Ripening	2004	BROMPTON	BOWSDN	NORTHUMBERLAND	WHEAT	DEEP CLAY	327.8	Days
Days to Ripening	2004	BROMPTON	BRAMHAM	LEEDS	OILSEED RAPE	MEDIUM	311	Days
Days to Ripening	2005	BROMPTON	RAGNALL	NOTTINGHAMSHIRE	OILSEED RAPE	MEDIUM	312	Days
Days to Ripening	2005	BROMPTON	CTHORPE	LINCOLNSHIRE	LINSEED	MEDIUM	271.7	Days
Days to Ripening	2005	BROMPTON	WATERBEACH	CAMBRIDGESHIRE	BEANS	ORGANIC	289.7	Days
Days to Ripening	2005	BROMPTON	WOLFERTON	NORFOLK	BEANS	DEEP CLAY	302	Days
Days to Ripening	2005	BROMPTON	HISTON	CAMBRIDGESHIRE	BEANS	DEEP CLAY	288.7	Days
Days to Ripening	2005	BROMPTON	ELGIN	MORAY	POTATO	MEDIUM	316.3	Days
Days to Ripening	2005	BROMPTON	SPALDING	LINCOLNSHIRE	VEGETABLES	DEEP FERTILE SILTY	283.7	Days
Days to Ripening	2005	BROMPTON	FRAMLINGHAM	SUFFOLK	PEAS	DEEP CLAY	282.3	Days
Days to Ripening	2005	BROMPTON	NEWCHURCH	KENT	PEAS	DEEP CLAY	312.7	Days
Days to Ripening	2005	BROMPTON	TELFORD	SHROPSHIRE	OILSEED RAPE	MEDIUM	302	Days
Days to Ripening	2005	BROMPTON	FRISBYONTHEWREAKE	LEICESTERSHIRE	PEAS	DEEP CLAY	296.3	Days
Days to Ripening	2005	BROMPTON	RHYND	PERTH AND KINROSS	WHEAT	MEDIUM	333.7	Days
Days to Ripening	2005	BROMPTON	UPSOMBORNE	HAMPSHIRE	GRASS	MEDIUM	305	Days
Days to Ripening	2005	BROMPTON	INCEBLUNDELL	SEFTON	OAT	LIGHT SAND	309	Days
Days to Ripening	2005	BROMPTON	LOCKERBIE	DUMFRIES AND GALLOWAY	BARLEY	LIGHT SAND	313.7	Days
Days to Ripening	2005	BROMPTON	HUMBIE	EAST LOTHIAN	OILSEED RAPE	MEDIUM	335	Days
Days to Ripening	2005	BROMPTON	WHITSOME	SCOTTISH BORDERS	WHEAT	DEEP CLAY	324.3	Days
Days to Ripening	2005	BROMPTON	BOWSDN	NORTHUMBERLAND	WHEAT	DEEP CLAY	329.7	Days
Days to Ripening	2005	BROMPTON	BARTHORPE	NORTH YORKSHIRE	OILSEED RAPE	DEEP CLAY	323.3	Days
Days to Ripening	2005	BROMPTON	HHALL	LEEDS	OILSEED RAPE	SHALLOW	297	Days
Days to Ripening	2006	BROMPTON	WOLFERTON	NORFOLK	-	-	288.67	Days
Days to Ripening	2006	BROMPTON	HUMBIE	EAST LOTHIAN	-	-	317.33	Days
Days to Ripening	2006	BROMPTON	TELFORD	SHROPSHIRE	-	-	304.67	Days
Days to Ripening	2006	BROMPTON	CRAMBE	NORTH YORKSHIRE	-	-	302.33	Days
Days to Ripening	2006	BROMPTON	LIMAVADY	CAUSEWAY COAST AND GLENS	-	-	319.67	Days
Days to Ripening	2006	BROMPTON	LAURENCEKIRK	ABERDEENSHIRE	-	-	325.33	Days
Days to Ripening	2006	BROMPTON	ELGIN	MORAY	-	-	326	Days
Days to Ripening	2006	BROMPTON	W-CHARLT	DEVON	-	-	303	Days
Days to Ripening	2006	BROMPTON	RHYND	PERTH AND KINROSS	-	-	318.67	Days
Days to Ripening	2006	BROMPTON	T-RAWSTN	DORSET	-	-	278.33	Days
Days to Ripening	2006	BROMPTON	LOCKERBIE	DUMFRIES AND GALLOWAY	-	-	313.33	Days
Days to Ripening	2006	BROMPTON	MORLEYSTBOTOLPH	NORFOLK	-	-	288	Days
Days to Ripening	2006	BROMPTON	HYTHE	KENT	-	-	301.33	Days
Days to Ripening	2006	BROMPTON	BOWSDN	NORTHUMBERLAND	-	-	314.67	Days
Days to Ripening	2006	BROMPTON	RAGNALL	NOTTINGHAMSHIRE	-	-	301.67	Days
Days to Ripening	2006	BROMPTON	HISTON	CAMBRIDGESHIRE	-	-	289	Days
Days to Ripening	2006	BROMPTON	FRAMLINGHAM	SUFFOLK	-	-	298.33	Days
Days to Ripening	2006	BROMPTON	FRISBYONTHEWREAKE	LEICESTERSHIRE	-	-	293	Days
Days to Ripening	2006	BROMPTON	SPALDING	LINCOLNSHIRE	-	-	292.67	Days
Days to Ripening	2007	BROMPTON	WOLFERTON	NORFOLK	-	-	302.33	Days
Days to Ripening	2007	BROMPTON	C-CREEVY	BELFAST	-	-	315.67	Days
Days to Ripening	2007	BROMPTON	LAURENCEKIRK	ABERDEENSHIRE	-	-	330.67	Days
Days to Ripening	2007	BROMPTON	ULCEBY	NORTH LINCOLNSHIRE	-	-	288.33	Days
Days to Ripening	2007	BROMPTON	POTTN	ABERDEENSHIRE	-	-	355	Days
Days to Ripening	2007	BROMPTON	HYTHE	KENT	-	-	301.33	Days
Days to Ripening	2007	BROMPTON	BOWSDN	NORTHUMBERLAND	-	-	323.67	Days
Days to Ripening	2007	BROMPTON	HISTON	CAMBRIDGESHIRE	-	-	294	Days
Days to Ripening	2007	BROMPTON	SPALDING	LINCOLNSHIRE	-	-	293	Days
Days to Ripening	2007	BROMPTON	HUMBIE	EAST LOTHIAN	-	-	336	Days
Days to Ripening	2007	BROMPTON	CRAMBE	NORTH YORKSHIRE	-	-	317	Days
Days to Ripening	2007	BROMPTON	HULL	EAST RIDING OF YORKSHIRE	-	-	298	Days
Days to Ripening	2007	BROMPTON	RUDSTON	EAST RIDING OF YORKSHIRE	-	-	315	Days
Days to Ripening	2007	BROMPTON	UPSOMBORNE	HAMPSHIRE	-	-	311.33	Days
Days to Ripening	2008	CASSIUS	WOLFERTON	NORFOLK	-	-	300.33	Days
Days to Ripening	2008	CASSIUS	DYCE	ABERDEENSHIRE	-	-	339	Days
Days to Ripening	2008	CASSIUS	HYTHE	KENT	-	-	307.33	Days
Days to Ripening	2008	CASSIUS	BOWSDN	NORTHUMBERLAND	-	-	312.67	Days
Days to Ripening	2008	CASSIUS	WELBOURN	LINCOLNSHIRE	-	-	322	Days
Days to Ripening	2008	CASSIUS	CAMBRIDGE	CAMBRIDGESHIRE	-	-	311.56	Days
Days to Ripening	2008	CASSIUS	HUMBIE	EAST LOTHIAN	-	-	335.67	Days
Days to Ripening	2008	CASSIUS	BUGTHORPE	NORTH YORKSHIRE	-	-	313	Days
Days to Ripening	2008	CASSIUS	BURY-STE	SUFFOLK	-	-	293.67	Days
Days to Ripening	2008	CASSIUS	LAURENCEKIRK	ABERDEENSHIRE	-	-	332	Days
Days to Ripening	2008	CASSIUS	BINBROOK	NORTH LINCOLNSHIRE	-	-	323.67	Days
Days to Ripening	2009	CASSIUS	CROFT-ON-TEES	NORTH YORKSHIRE	BEANS	MEDIUM	321.67	Days
Days to Ripening	2009	CASSIUS	ULCEBY	NORTH LINCOLNSHIRE	OILSEED RAPE	D-CLAY	294	Days
Days to Ripening	2009	CASSIUS	DYCE	ABERDEENSHIRE	BARLEY	L-SAND	331	Days
Days to Ripening	2009	CASSIUS	HYTHE	KENT	OILSEED RAPE	D-CLAY	302.67	Days
Days to Ripening	2009	CASSIUS	WELBOURN	LINCOLNSHIRE	OILSEED RAPE	SHALLOW	316.67	Days
Days to Ripening	2009	CASSIUS	BEAUSALE	WARWICKSHIRE	OILSEED RAPE	D-CLAY	304.67	Days
Days to Ripening	2009	CASSIUS	GIRTON	CAMBRIDGESHIRE	OTHER	MEDIUM	298	Days
Days to Ripening	2009	CASSIUS	HOLBEACH	LINCOLNSHIRE	OTHER	D-SILT	284	Days
Days to Ripening	2009	CASSIUS	RUDSTON	EAST RIDING OF YORKSHIRE	OILSEED RAPE	SHALLOW	308	Days
Days to Ripening	2009	CASSIUS	WINCHESTER	HAMPSHIRE	PEAS	MEDIUM	294	Days
Days to Ripening	2009	CASSIUS	FRAMLINGHAM	SUFFOLK	OILSEED RAPE	D-CLAY	296.33	Days
Days to Ripening	2009	CASSIUS	LAURENCEKIRK	ABERDEENSHIRE	OILSEED RAPE	MEDIUM	347	Days
Days to Ripening	2010	CASSIUS	CROFT-ON-TEES	NORTH YORKSHIRE	BEANS	MEDIUM	329.33	Days
Days to Ripening	2010	CASSIUS	C-CREEVY	BELFAST	BARLEY	MEDIUM	325	Days
Days to Ripening	2010	CASSIUS	LAURENCEKIRK	ABERDEENSHIRE	OILSEED RAPE	MEDIUM	341.33	Days
Days to Ripening	2010	CASSIUS	ELLON	ABERDEENSHIRE	BARLEY	L-SAND	343	Days
Days to Ripening	2010	CASSIUS	ULCEBY	NORTH LINCOLNSHIRE	OILSEED RAPE	D-CLAY	325	Days
Days to Ripening	2010	CASSIUS	NEWCHURCH	KENT	PEAS	D-CLAY	310	Days
Days to Ripening	2010	CASSIUS	WELBOURN	LINCOLNSHIRE	OILSEED RAPE	SHALLOW	322.33	Days
Days to Ripening	2010	CASSIUS	HASELY	WARWICKSHIRE	OILSEED RAPE	MEDIUM	307	Days
Days to Ripening	2010	CASSIUS	LILLESDN	SOMERSET	WHEAT	MEDIUM	272.33	Days
Days to Ripening	2010	CASSIUS	GIRTON	CAMBRIDGESHIRE	BEANS	MEDIUM	295	Days
Days to Ripening	2010	CASSIUS	HUMBIE	EAST LOTHIAN	GRASS	MEDIUM	332.67	Days
Days to Ripening	2010	CASSIUS	CRAWLY	HAMPSHIRE	OAT	MEDIUM	298.33	Days
Days to Ripening	2010	CASSIUS	FRAMLINGHAM	SUFFOLK	OILSEED RAPE	D-CLAY	291.33	Days
Days to Ripening	2010	CASSIUS	FRISBYONTHEWREAKE	LEICESTERSHIRE	OILSEED RAPE	D-CLAY	300.33	Days
Days to Ripening	2012	CHILTON	CROFT-ON-TEES	NORTH YORKSHIRE	-	-	333.67	Days
Days to Ripening	2012	CHILTON	ELLON	ABERDEENSHIRE	-	-	345	Days
Days to Ripening	2012	CHILTON	ST-BOSW	SCOTTISH BORDERS	-	-	344.33	Days
Days to Ripening	2012	CHILTON	BALGONIE	FIFE	-	-	346.33	Days
Days to Ripening	2012	CHILTON	STCHWRTH	CAMBRIDGESHIRE	-	-	300.67	Days
Days to Ripening	2012	CHILTON	ULCEBY	NORTH LINCOLNSHIRE	-	-	321.33	Days
Days to Ripening	2012	CHILTON	LUTHERMR	ABERDEENSHIRE	-	-	336.33	Days
Days to Ripening	2012	CHILTON	PETHAM	KENT	-	-	308	Days
Days to Ripening	2012	CHILTON	WELBOURN	LINCOLNSHIRE	-	-	329	Days
Days to Ripening	2012	CHILTON	HUMBIE	EAST LOTHIAN	-	-	347.33	Days
Days to Ripening	2012	CHILTON	HINSTOCK	SHROPSHIRE	-	-	320.33	Days
Days to Ripening	2012	CHILTON	LYMM	CHESHIRE EAST	-	-	313.33	Days
Days to Ripening	2012	CHILTON	BARTHORPE	NORTH YORKSHIRE	-	-	321.67	Days
Days to Ripening	2012	CHILTON	FRAMLINGHAM	SUFFOLK	-	-	321	Days
Days to Ripening	2012	CHILTON	ATTLEBRO	NORFOLK	-	-	283.33	Days
Days to Ripening	2012	CHILTON	ICKLETON	CAMBRIDGESHIRE	-	-	304.33	Days
Days to Ripening	2013	CHILTON	STOWMARKET	SUFFOLK	WHEAT	D-CLAY	299.33	Days
Days to Ripening	2013	CHILTON	ULCEBY	NORTH LINCOLNSHIRE	OILSEED RAPE	D-CLAY	320	Days
Days to Ripening	2013	CHILTON	LUTHERMR	ABERDEENSHIRE	WHEAT	MEDIUM	290.33	Days
Days to Ripening	2013	CHILTON	WELBOURN	LINCOLNSHIRE	BARLEY	SHALLOW	318.67	Days
Days to Ripening	2013	CHILTON	MOULTON	LINCOLNSHIRE	PEAS	D-SILT	304	Days
Days to Ripening	2013	CHILTON	EDGMOND	SHROPSHIRE	OAT	L-SAND	302.67	Days
Days to Ripening	2013	CHILTON	ICKLETON	CAMBRIDGESHIRE	WHEAT	MEDIUM	273	Days
Days to Ripening	2013	CHILTON	ELLON	ABERDEENSHIRE	BARLEY	L-SAND	328.67	Days
Days to Ripening	2013	CHILTON	ST-BOSW	SCOTTISH BORDERS	POTATO	L-SAND	323.33	Days
Days to Ripening	2013	CHILTON	BALGONIE	FIFE	OAT	L-SAND	321.67	Days
Days to Ripening	2013	CHILTON	ALKERTON	OXFORDSHIRE	BARLEY	L-SAND	323	Days
Days to Ripening	2014	CHILTON	CROFT-ON-TEES	NORTH YORKSHIRE	BEANS	MEDIUM	316.67	Days
Days to Ripening	2014	CHILTON	MORLEYSTBOTOLPH	NORFOLK	OILSEED RAPE	MEDIUM	294.67	Days
Days to Ripening	2014	CHILTON	ICKLETON	CAMBRIDGESHIRE	WHEAT	MEDIUM	291	Days
Days to Ripening	2014	CHILTON	AUCHNAGATT	ABERDEENSHIRE	WHEAT	L-SAND	340	Days
Days to Ripening	2014	CHILTON	ST-BOSW	SCOTTISH BORDERS	POTATO	L-SAND	321.67	Days
Days to Ripening	2014	CHILTON	BALGONIE	FIFE	OILSEED RAPE	L-SAND	332	Days
Days to Ripening	2014	CHILTON	ALKERTON	OXFORDSHIRE	BEANS	L-SAND	311	Days
Days to Ripening	2014	CHILTON	ULCEBY	NORTH LINCOLNSHIRE	OILSEED RAPE	D-CLAY	312.67	Days
Days to Ripening	2014	CHILTON	LUTHERMR	ABERDEENSHIRE	POTATO	MEDIUM	309.33	Days
Days to Ripening	2014	CHILTON	PETHAM	KENT	OAT	MEDIUM	287	Days
Days to Ripening	2014	CHILTON	WELBOURN	LINCOLNSHIRE	BARLEY	SHALLOW	304.33	Days
Days to Ripening	2014	CHILTON	MOULTON	LINCOLNSHIRE	VEGETABLES	D-SILT	300.67	Days
Days to Ripening	2014	CHILTON	HLEGH	CHESHIRE EAST	WHEAT	MEDIUM	309.33	Days
Days to Ripening	2014	CHILTON	EDGMOND	SHROPSHIRE	GRASS	MEDIUM	305.67	Days
Days to Ripening	2014	CHILTON	BARTHORPE	NORTH YORKSHIRE	OILSEED RAPE	D-CLAY	308.33	Days
Days to Ripening	2014	CHILTON	SANCTON	EAST RIDING OF YORKSHIRE	OILSEED RAPE	MEDIUM	303.67	Days
Days to Ripening	2014	CHILTON	BEDFIELD	SUFFOLK	OILSEED RAPE	D-CLAY	300	Days
Days to Ripening	2014	CHILTON	FRISBYONTHEWREAKE	LEICESTERSHIRE	OILSEED RAPE	D-CLAY	297.33	Days
Days to Ripening	2002	CLAIRE	WORKSOP	NOTTINGHAMSHIRE	-	-	301	Days
Days to Ripening	2002	CLAIRE	SLEAFORD	LINCOLNSHIRE	-	-	290	Days
Days to Ripening	2002	CLAIRE	FAKENHAM	NORFOLK	-	-	288	Days
Days to Ripening	2002	CLAIRE	KINGSLYNN	NORFOLK	-	-	296	Days
Days to Ripening	2002	CLAIRE	KETTG	NORTHAMPTONSHIRE	-	-	305	Days
Days to Ripening	2002	CLAIRE	OLDM	ABERDEENSHIRE	-	-	339	Days
Days to Ripening	2002	CLAIRE	WYMONDHAM	NORFOLK	-	-	303	Days
Days to Ripening	2002	CLAIRE	SPALDING	LINCOLNSHIRE	-	-	285	Days
Days to Ripening	2002	CLAIRE	OTLEY	SUFFOLK	-	-	300	Days
Days to Ripening	2002	CLAIRE	ASHFD	KENT	-	-	310	Days
Days to Ripening	2002	CLAIRE	TELFORD	SHROPSHIRE	-	-	314	Days
Days to Ripening	2002	CLAIRE	WARMR	WILTSHIRE	-	-	312	Days
Days to Ripening	2002	CLAIRE	COUPAR	PERTH AND KINROSS	-	-	327	Days
Days to Ripening	2002	CLAIRE	WINCHESTER	HAMPSHIRE	-	-	309	Days
Days to Ripening	2002	CLAIRE	WIMBOURNESTGILES	DORSET	-	-	294	Days
Days to Ripening	2002	CLAIRE	ANNAN	DUMFRIES AND GALLOWAY	-	-	315	Days
Days to Ripening	2002	CLAIRE	LIMAVADY	CAUSEWAY COAST AND GLENS	-	-	315	Days
Days to Ripening	2002	CLAIRE	EDINB	CITY OF EDINBURGH	-	-	329	Days
Days to Ripening	2002	CLAIRE	COLDSM	SCOTTISH BORDERS	-	-	320	Days
Days to Ripening	2002	CLAIRE	CROFT-ON-TEES	NORTH YORKSHIRE	-	-	320	Days
Days to Ripening	2002	CLAIRE	TADCASTER	NORTH YORKSHIRE	-	-	301	Days
Days to Ripening	2003	CLAIRE	ABERDEEN	ABERDEENSHIRE	GRASS	SANDY CLAY LOAM	325	Days
Days to Ripening	2003	CLAIRE	WORKSOP	NOTTINGHAMSHIRE	VEGETABLES	LIGHT SAND	306	Days
Days to Ripening	2003	CLAIRE	WATERBEACH	CAMBRIDGESHIRE	PEAS	PEATY SOIL	275	Days
Days to Ripening	2003	CLAIRE	FAKENHAM	NORFOLK	BEET	LIGHT SAND	278	Days
Days to Ripening	2003	CLAIRE	ELGIN	MORAY	BARLEY	SANDY CLAY	320	Days
Days to Ripening	2003	CLAIRE	WYMONDHAM	NORFOLK	WHEAT	MEDIUM	295	Days
Days to Ripening	2003	CLAIRE	SPALDING	LINCOLNSHIRE	PEAS	DEEP FERTILE SILTY	277.7	Days
Days to Ripening	2003	CLAIRE	CANTERBURY	KENT	OILSEED RAPE	DEEP FERTILE SILTY	309	Days
Days to Ripening	2003	CLAIRE	MEMOW	LEICESTERSHIRE	OILSEED RAPE	DEEP CLAY	274.7	Days
Days to Ripening	2003	CLAIRE	WINCHESTER	HAMPSHIRE	POPPY	MEDIUM	300	Days
Days to Ripening	2003	CLAIRE	KINGSTON	DEVON	OAT	CLAY LOAM	302.7	Days
Days to Ripening	2003	CLAIRE	LOCKERBIE	DUMFRIES AND GALLOWAY	BARLEY	LIGHT SAND	317.3	Days
Days to Ripening	2003	CLAIRE	LIMAVADY	CAUSEWAY COAST AND GLENS	WHEAT	DEEP CLAY	314	Days
Days to Ripening	2003	CLAIRE	HADDINGTON	EAST LOTHIAN	WHEAT	MEDIUM	311.7	Days
Days to Ripening	2003	CLAIRE	DUNS	SCOTTISH BORDERS	OILSEED RAPE	DEEP CLAY	321	Days
Days to Ripening	2003	CLAIRE	CROFT-ON-TEES	NORTH YORKSHIRE	POTATO	DEEP CLAY	312.3	Days
Days to Ripening	2003	CLAIRE	TADCASTER	NORTH YORKSHIRE	POTATO	SHALLOW	302	Days
Days to Ripening	2004	CLAIRE	LAURENCEKIRK	ABERDEENSHIRE	OILSEED RAPE	MEDIUM	338	Days
Days to Ripening	2004	CLAIRE	RAGNALL	NOTTINGHAMSHIRE	OILSEED RAPE	MEDIUM	326.3	Days
Days to Ripening	2004	CLAIRE	WATERBEACH	CAMBRIDGESHIRE	BEANS	ORGANIC	285.7	Days
Days to Ripening	2004	CLAIRE	WOLFERTON	NORFOLK	BEANS	DEEP CLAY	306.7	Days
Days to Ripening	2004	CLAIRE	GIRTON	CAMBRIDGESHIRE	BEANS	DEEP CLAY	300.7	Days
Days to Ripening	2004	CLAIRE	WYE	KENT	OILSEED RAPE	MEDIUM	319.3	Days
Days to Ripening	2004	CLAIRE	FRISBYONTHEWREAKE	LEICESTERSHIRE	PEAS	DEEP CLAY	301.7	Days
Days to Ripening	2004	CLAIRE	COATES	GLOUCESTERSHIRE	WHEAT	SHALLOW	297.7	Days
Days to Ripening	2004	CLAIRE	WARWICK	WARWICKSHIRE	WHEAT	DEEP CLAY	302	Days
Days to Ripening	2004	CLAIRE	UPSOMBORNE	HAMPSHIRE	PEAS	MEDIUM	310	Days
Days to Ripening	2004	CLAIRE	LIMAVADY	CAUSEWAY COAST AND GLENS	WHEAT	DEEP CLAY	327	Days
Days to Ripening	2004	CLAIRE	HUMBIE	EAST LOTHIAN	WHEAT	MEDIUM	331	Days
Days to Ripening	2004	CLAIRE	BOWSDN	NORTHUMBERLAND	WHEAT	DEEP CLAY	326.8	Days
Days to Ripening	2004	CLAIRE	BRAMHAM	LEEDS	OILSEED RAPE	MEDIUM	311	Days
Days to Ripening	2005	CLAIRE	RAGNALL	NOTTINGHAMSHIRE	OILSEED RAPE	MEDIUM	315.3	Days
Days to Ripening	2005	CLAIRE	CTHORPE	LINCOLNSHIRE	LINSEED	MEDIUM	268.3	Days
Days to Ripening	2005	CLAIRE	WATERBEACH	CAMBRIDGESHIRE	BEANS	ORGANIC	289.7	Days
Days to Ripening	2005	CLAIRE	WOLFERTON	NORFOLK	BEANS	DEEP CLAY	300.3	Days
Days to Ripening	2005	CLAIRE	HISTON	CAMBRIDGESHIRE	BEANS	DEEP CLAY	287	Days
Days to Ripening	2005	CLAIRE	ELGIN	MORAY	POTATO	MEDIUM	311.7	Days
Days to Ripening	2005	CLAIRE	SPALDING	LINCOLNSHIRE	VEGETABLES	DEEP FERTILE SILTY	282.3	Days
Days to Ripening	2005	CLAIRE	FRAMLINGHAM	SUFFOLK	PEAS	DEEP CLAY	281.3	Days
Days to Ripening	2005	CLAIRE	NEWCHURCH	KENT	PEAS	DEEP CLAY	312.7	Days
Days to Ripening	2005	CLAIRE	TELFORD	SHROPSHIRE	OILSEED RAPE	MEDIUM	301.7	Days
Days to Ripening	2005	CLAIRE	FRISBYONTHEWREAKE	LEICESTERSHIRE	PEAS	DEEP CLAY	295	Days
Days to Ripening	2005	CLAIRE	RHYND	PERTH AND KINROSS	WHEAT	MEDIUM	333	Days
Days to Ripening	2005	CLAIRE	UPSOMBORNE	HAMPSHIRE	GRASS	MEDIUM	305	Days
Days to Ripening	2005	CLAIRE	INCEBLUNDELL	SEFTON	OAT	LIGHT SAND	311.7	Days
Days to Ripening	2005	CLAIRE	LOCKERBIE	DUMFRIES AND GALLOWAY	BARLEY	LIGHT SAND	314	Days
Days to Ripening	2005	CLAIRE	HUMBIE	EAST LOTHIAN	OILSEED RAPE	MEDIUM	335.7	Days
Days to Ripening	2005	CLAIRE	WHITSOME	SCOTTISH BORDERS	WHEAT	DEEP CLAY	323.3	Days
Days to Ripening	2005	CLAIRE	BOWSDN	NORTHUMBERLAND	WHEAT	DEEP CLAY	330.3	Days
Days to Ripening	2005	CLAIRE	BARTHORPE	NORTH YORKSHIRE	OILSEED RAPE	DEEP CLAY	320	Days
Days to Ripening	2005	CLAIRE	HHALL	LEEDS	OILSEED RAPE	SHALLOW	294.7	Days
Days to Ripening	2006	CLAIRE	WOLFERTON	NORFOLK	-	-	288.33	Days
Days to Ripening	2006	CLAIRE	HUMBIE	EAST LOTHIAN	-	-	316.67	Days
Days to Ripening	2006	CLAIRE	TELFORD	SHROPSHIRE	-	-	304.33	Days
Days to Ripening	2006	CLAIRE	CRAMBE	NORTH YORKSHIRE	-	-	301.33	Days
Days to Ripening	2006	CLAIRE	LIMAVADY	CAUSEWAY COAST AND GLENS	-	-	321	Days
Days to Ripening	2006	CLAIRE	LAURENCEKIRK	ABERDEENSHIRE	-	-	328.67	Days
Days to Ripening	2006	CLAIRE	ELGIN	MORAY	-	-	327.67	Days
Days to Ripening	2006	CLAIRE	W-CHARLT	DEVON	-	-	303	Days
Days to Ripening	2006	CLAIRE	T-RAWSTN	DORSET	-	-	279	Days
Days to Ripening	2006	CLAIRE	LOCKERBIE	DUMFRIES AND GALLOWAY	-	-	313	Days
Days to Ripening	2006	CLAIRE	MORLEYSTBOTOLPH	NORFOLK	-	-	290	Days
Days to Ripening	2006	CLAIRE	HYTHE	KENT	-	-	302	Days
Days to Ripening	2006	CLAIRE	BOWSDN	NORTHUMBERLAND	-	-	317	Days
Days to Ripening	2006	CLAIRE	RAGNALL	NOTTINGHAMSHIRE	-	-	300.33	Days
Days to Ripening	2006	CLAIRE	HISTON	CAMBRIDGESHIRE	-	-	289	Days
Days to Ripening	2006	CLAIRE	FRAMLINGHAM	SUFFOLK	-	-	299	Days
Days to Ripening	2006	CLAIRE	FRISBYONTHEWREAKE	LEICESTERSHIRE	-	-	293.67	Days
Days to Ripening	2006	CLAIRE	SPALDING	LINCOLNSHIRE	-	-	293	Days
Days to Ripening	2007	CLAIRE	WOLFERTON	NORFOLK	-	-	302.33	Days
Days to Ripening	2007	CLAIRE	C-CREEVY	BELFAST	-	-	315	Days
Days to Ripening	2007	CLAIRE	LAURENCEKIRK	ABERDEENSHIRE	-	-	327.33	Days
Days to Ripening	2007	CLAIRE	ULCEBY	NORTH LINCOLNSHIRE	-	-	291	Days
Days to Ripening	2007	CLAIRE	POTTN	ABERDEENSHIRE	-	-	356.33	Days
Days to Ripening	2007	CLAIRE	HYTHE	KENT	-	-	299.67	Days
Days to Ripening	2007	CLAIRE	BOWSDN	NORTHUMBERLAND	-	-	321	Days
Days to Ripening	2007	CLAIRE	HISTON	CAMBRIDGESHIRE	-	-	298.67	Days
Days to Ripening	2007	CLAIRE	SPALDING	LINCOLNSHIRE	-	-	293	Days
Days to Ripening	2007	CLAIRE	HUMBIE	EAST LOTHIAN	-	-	334	Days
Days to Ripening	2007	CLAIRE	CRAMBE	NORTH YORKSHIRE	-	-	316.67	Days
Days to Ripening	2007	CLAIRE	HULL	EAST RIDING OF YORKSHIRE	-	-	296	Days
Days to Ripening	2007	CLAIRE	RUDSTON	EAST RIDING OF YORKSHIRE	-	-	316.33	Days
Days to Ripening	2007	CLAIRE	UPSOMBORNE	HAMPSHIRE	-	-	311	Days
Days to Ripening	2008	CLAIRE	WOLFERTON	NORFOLK	-	-	299.67	Days
Days to Ripening	2008	CLAIRE	DYCE	ABERDEENSHIRE	-	-	339	Days
Days to Ripening	2008	CLAIRE	HYTHE	KENT	-	-	306.67	Days
Days to Ripening	2008	CLAIRE	BOWSDN	NORTHUMBERLAND	-	-	311.67	Days
Days to Ripening	2008	CLAIRE	WELBOURN	LINCOLNSHIRE	-	-	322.33	Days
Days to Ripening	2008	CLAIRE	CAMBRIDGE	CAMBRIDGESHIRE	-	-	309.78	Days
Days to Ripening	2008	CLAIRE	HUMBIE	EAST LOTHIAN	-	-	335	Days
Days to Ripening	2008	CLAIRE	BUGTHORPE	NORTH YORKSHIRE	-	-	307.33	Days
Days to Ripening	2008	CLAIRE	BURY-STE	SUFFOLK	-	-	292	Days
Days to Ripening	2008	CLAIRE	LAURENCEKIRK	ABERDEENSHIRE	-	-	331.33	Days
Days to Ripening	2008	CLAIRE	BINBROOK	NORTH LINCOLNSHIRE	-	-	323	Days
Days to Ripening	2009	CLAIRE	CROFT-ON-TEES	NORTH YORKSHIRE	BEANS	MEDIUM	322.33	Days
Days to Ripening	2009	CLAIRE	WELBOURN	LINCOLNSHIRE	OILSEED RAPE	SHALLOW	314.67	Days
Days to Ripening	2009	CLAIRE	BEAUSALE	WARWICKSHIRE	OILSEED RAPE	D-CLAY	303.67	Days
Days to Ripening	2009	CLAIRE	GIRTON	CAMBRIDGESHIRE	OTHER	MEDIUM	301.67	Days
Days to Ripening	2009	CLAIRE	RUDSTON	EAST RIDING OF YORKSHIRE	OILSEED RAPE	SHALLOW	301.67	Days
Days to Ripening	2009	CLAIRE	WINCHESTER	HAMPSHIRE	PEAS	MEDIUM	292.67	Days
Days to Ripening	2010	CLAIRE	CROFT-ON-TEES	NORTH YORKSHIRE	BEANS	MEDIUM	328.67	Days
Days to Ripening	2010	CLAIRE	C-CREEVY	BELFAST	BARLEY	MEDIUM	325.67	Days
Days to Ripening	2010	CLAIRE	WELBOURN	LINCOLNSHIRE	OILSEED RAPE	SHALLOW	318	Days
Days to Ripening	2010	CLAIRE	HASELY	WARWICKSHIRE	OILSEED RAPE	MEDIUM	307	Days
Days to Ripening	2010	CLAIRE	GIRTON	CAMBRIDGESHIRE	BEANS	MEDIUM	301.67	Days
Days to Ripening	2010	CLAIRE	HUMBIE	EAST LOTHIAN	GRASS	MEDIUM	329	Days
Days to Ripening	2010	CLAIRE	CRAWLY	HAMPSHIRE	OAT	MEDIUM	295	Days
Days to Ripening	2012	CLAIRE	CROFT-ON-TEES	NORTH YORKSHIRE	-	-	334.33	Days
Days to Ripening	2012	CLAIRE	WELBOURN	LINCOLNSHIRE	-	-	330	Days
Days to Ripening	2012	CLAIRE	HUMBIE	EAST LOTHIAN	-	-	346.67	Days
Days to Ripening	2012	CLAIRE	HINSTOCK	SHROPSHIRE	-	-	321	Days
Days to Ripening	2012	CLAIRE	ATTLEBRO	NORFOLK	-	-	280.67	Days
Days to Ripening	2013	CLAIRE	WELBOURN	LINCOLNSHIRE	BARLEY	SHALLOW	318	Days
Days to Ripening	2013	CLAIRE	EDGMOND	SHROPSHIRE	OAT	L-SAND	302.5	Days
Days to Ripening	2013	CLAIRE	ALKERTON	OXFORDSHIRE	BARLEY	L-SAND	323	Days
Days to Ripening	2014	CLAIRE	CROFT-ON-TEES	NORTH YORKSHIRE	BEANS	MEDIUM	316	Days
Days to Ripening	2014	CLAIRE	MORLEYSTBOTOLPH	NORFOLK	OILSEED RAPE	MEDIUM	296	Days
Days to Ripening	2014	CLAIRE	ALKERTON	OXFORDSHIRE	BEANS	L-SAND	311	Days
Days to Ripening	2014	CLAIRE	WELBOURN	LINCOLNSHIRE	BARLEY	SHALLOW	303.33	Days
Days to Ripening	2014	CLAIRE	EDGMOND	SHROPSHIRE	GRASS	MEDIUM	306.33	Days
Days to Ripening	2014	CLAIRE	SANCTON	EAST RIDING OF YORKSHIRE	OILSEED RAPE	MEDIUM	304.33	Days
Days to Ripening	2015	CLAIRE	ALKERTON	OXFORDSHIRE	BEANS	L-SAND	310	Days
Days to Ripening	2015	CLAIRE	CROFT-ON-TEES	NORTH YORKSHIRE	BEANS	MEDIUM	331.67	Days
Days to Ripening	2015	CLAIRE	WELBOURN	LINCOLNSHIRE	BARLEY	SHALLOW	322	Days
Days to Ripening	2015	CLAIRE	HUMBIE	EAST LOTHIAN	OILSEED RAPE	MEDIUM	348.33	Days
Days to Ripening	2015	CLAIRE	MORLEYSTBOTOLPH	NORFOLK	OILSEED RAPE	MEDIUM	301.33	Days
Days to Ripening	2016	CLAIRE	LIMAVADY	CAUSEWAY COAST AND GLENS	POTATO	D-SILT	309.33	Days
Days to Ripening	2016	CLAIRE	ALKERTON	OXFORDSHIRE	BEANS	MEDIUM	301	Days
Days to Ripening	2016	CLAIRE	WELBOURN	LINCOLNSHIRE	OILSEED RAPE	SHALLOW	320	Days
Days to Ripening	2016	CLAIRE	BAINTON	EAST RIDING OF YORKSHIRE	OILSEED RAPE	MEDIUM	315	Days
Days to Ripening	2016	CLAIRE	HUMBIE	EAST LOTHIAN	OILSEED RAPE	MEDIUM	343.67	Days
Days to Ripening	2010	COCOON	CROFT-ON-TEES	NORTH YORKSHIRE	BEANS	MEDIUM	329	Days
Days to Ripening	2010	COCOON	C-CREEVY	BELFAST	BARLEY	MEDIUM	324.33	Days
Days to Ripening	2010	COCOON	LAURENCEKIRK	ABERDEENSHIRE	OILSEED RAPE	MEDIUM	342.67	Days
Days to Ripening	2010	COCOON	ELLON	ABERDEENSHIRE	BARLEY	L-SAND	345.67	Days
Days to Ripening	2010	COCOON	ULCEBY	NORTH LINCOLNSHIRE	OILSEED RAPE	D-CLAY	329.67	Days
Days to Ripening	2010	COCOON	NEWCHURCH	KENT	PEAS	D-CLAY	316	Days
Days to Ripening	2010	COCOON	WELBOURN	LINCOLNSHIRE	OILSEED RAPE	SHALLOW	323	Days
Days to Ripening	2010	COCOON	HASELY	WARWICKSHIRE	OILSEED RAPE	MEDIUM	315	Days
Days to Ripening	2010	COCOON	LILLESDN	SOMERSET	WHEAT	MEDIUM	268.67	Days
Days to Ripening	2010	COCOON	GIRTON	CAMBRIDGESHIRE	BEANS	MEDIUM	293.67	Days
Days to Ripening	2010	COCOON	HUMBIE	EAST LOTHIAN	GRASS	MEDIUM	344	Days
Days to Ripening	2010	COCOON	CRAWLY	HAMPSHIRE	OAT	MEDIUM	294	Days
Days to Ripening	2010	COCOON	FRAMLINGHAM	SUFFOLK	OILSEED RAPE	D-CLAY	294.67	Days
Days to Ripening	2010	COCOON	FRISBYONTHEWREAKE	LEICESTERSHIRE	OILSEED RAPE	D-CLAY	307	Days
Days to Ripening	2012	COCOON	CROFT-ON-TEES	NORTH YORKSHIRE	-	-	335	Days
Days to Ripening	2012	COCOON	ELLON	ABERDEENSHIRE	-	-	348.33	Days
Days to Ripening	2012	COCOON	ST-BOSW	SCOTTISH BORDERS	-	-	345.67	Days
Days to Ripening	2012	COCOON	BALGONIE	FIFE	-	-	347	Days
Days to Ripening	2012	COCOON	STCHWRTH	CAMBRIDGESHIRE	-	-	299.33	Days
Days to Ripening	2012	COCOON	ULCEBY	NORTH LINCOLNSHIRE	-	-	320.67	Days
Days to Ripening	2012	COCOON	LUTHERMR	ABERDEENSHIRE	-	-	338.33	Days
Days to Ripening	2012	COCOON	PETHAM	KENT	-	-	312.33	Days
Days to Ripening	2012	COCOON	WELBOURN	LINCOLNSHIRE	-	-	330.67	Days
Days to Ripening	2012	COCOON	HUMBIE	EAST LOTHIAN	-	-	353.67	Days
Days to Ripening	2012	COCOON	HINSTOCK	SHROPSHIRE	-	-	325	Days
Days to Ripening	2012	COCOON	LYMM	CHESHIRE EAST	-	-	317	Days
Days to Ripening	2012	COCOON	BARTHORPE	NORTH YORKSHIRE	-	-	326.67	Days
Days to Ripening	2012	COCOON	FRAMLINGHAM	SUFFOLK	-	-	324	Days
Days to Ripening	2012	COCOON	ATTLEBRO	NORFOLK	-	-	281.33	Days
Days to Ripening	2012	COCOON	ICKLETON	CAMBRIDGESHIRE	-	-	309.33	Days
Days to Ripening	2013	COCOON	STOWMARKET	SUFFOLK	WHEAT	D-CLAY	304	Days
Days to Ripening	2013	COCOON	ULCEBY	NORTH LINCOLNSHIRE	OILSEED RAPE	D-CLAY	323	Days
Days to Ripening	2013	COCOON	WELBOURN	LINCOLNSHIRE	BARLEY	SHALLOW	324	Days
Days to Ripening	2013	COCOON	MOULTON	LINCOLNSHIRE	PEAS	D-SILT	305.33	Days
Days to Ripening	2013	COCOON	EDGMOND	SHROPSHIRE	OAT	L-SAND	305.33	Days
Days to Ripening	2013	COCOON	ICKLETON	CAMBRIDGESHIRE	WHEAT	MEDIUM	279	Days
Days to Ripening	2013	COCOON	ALKERTON	OXFORDSHIRE	BARLEY	L-SAND	323	Days
Days to Ripening	2008	CONQUEROR	WOLFERTON	NORFOLK	-	-	299	Days
Days to Ripening	2008	CONQUEROR	DYCE	ABERDEENSHIRE	-	-	340.33	Days
Days to Ripening	2008	CONQUEROR	HYTHE	KENT	-	-	307	Days
Days to Ripening	2008	CONQUEROR	BOWSDN	NORTHUMBERLAND	-	-	312	Days
Days to Ripening	2008	CONQUEROR	WELBOURN	LINCOLNSHIRE	-	-	322	Days
Days to Ripening	2008	CONQUEROR	CAMBRIDGE	CAMBRIDGESHIRE	-	-	312.22	Days
Days to Ripening	2008	CONQUEROR	HUMBIE	EAST LOTHIAN	-	-	338	Days
Days to Ripening	2008	CONQUEROR	BUGTHORPE	NORTH YORKSHIRE	-	-	313.67	Days
Days to Ripening	2008	CONQUEROR	BURY-STE	SUFFOLK	-	-	292.33	Days
Days to Ripening	2008	CONQUEROR	LAURENCEKIRK	ABERDEENSHIRE	-	-	333.33	Days
Days to Ripening	2008	CONQUEROR	BINBROOK	NORTH LINCOLNSHIRE	-	-	325	Days
Days to Ripening	2009	CONQUEROR	CROFT-ON-TEES	NORTH YORKSHIRE	BEANS	MEDIUM	324.33	Days
Days to Ripening	2009	CONQUEROR	ULCEBY	NORTH LINCOLNSHIRE	OILSEED RAPE	D-CLAY	297	Days
Days to Ripening	2009	CONQUEROR	DYCE	ABERDEENSHIRE	BARLEY	L-SAND	333	Days
Days to Ripening	2009	CONQUEROR	HYTHE	KENT	OILSEED RAPE	D-CLAY	304.33	Days
Days to Ripening	2009	CONQUEROR	WELBOURN	LINCOLNSHIRE	OILSEED RAPE	SHALLOW	322.67	Days
Days to Ripening	2009	CONQUEROR	BEAUSALE	WARWICKSHIRE	OILSEED RAPE	D-CLAY	304.67	Days
Days to Ripening	2009	CONQUEROR	GIRTON	CAMBRIDGESHIRE	OTHER	MEDIUM	301.33	Days
Days to Ripening	2009	CONQUEROR	HOLBEACH	LINCOLNSHIRE	OTHER	D-SILT	284	Days
Days to Ripening	2009	CONQUEROR	RUDSTON	EAST RIDING OF YORKSHIRE	OILSEED RAPE	SHALLOW	307.67	Days
Days to Ripening	2009	CONQUEROR	WINCHESTER	HAMPSHIRE	PEAS	MEDIUM	296	Days
Days to Ripening	2009	CONQUEROR	FRAMLINGHAM	SUFFOLK	OILSEED RAPE	D-CLAY	296.67	Days
Days to Ripening	2009	CONQUEROR	LAURENCEKIRK	ABERDEENSHIRE	OILSEED RAPE	MEDIUM	347.67	Days
Days to Ripening	2010	CONQUEROR	CROFT-ON-TEES	NORTH YORKSHIRE	BEANS	MEDIUM	327.67	Days
Days to Ripening	2010	CONQUEROR	C-CREEVY	BELFAST	BARLEY	MEDIUM	325	Days
Days to Ripening	2010	CONQUEROR	LAURENCEKIRK	ABERDEENSHIRE	OILSEED RAPE	MEDIUM	340	Days
Days to Ripening	2010	CONQUEROR	ELLON	ABERDEENSHIRE	BARLEY	L-SAND	342.33	Days
Days to Ripening	2010	CONQUEROR	ULCEBY	NORTH LINCOLNSHIRE	OILSEED RAPE	D-CLAY	326.67	Days
Days to Ripening	2010	CONQUEROR	NEWCHURCH	KENT	PEAS	D-CLAY	311.33	Days
Days to Ripening	2010	CONQUEROR	WELBOURN	LINCOLNSHIRE	OILSEED RAPE	SHALLOW	321	Days
Days to Ripening	2010	CONQUEROR	HASELY	WARWICKSHIRE	OILSEED RAPE	MEDIUM	303.67	Days
Days to Ripening	2010	CONQUEROR	LILLESDN	SOMERSET	WHEAT	MEDIUM	273	Days
Days to Ripening	2010	CONQUEROR	GIRTON	CAMBRIDGESHIRE	BEANS	MEDIUM	305	Days
Days to Ripening	2010	CONQUEROR	HUMBIE	EAST LOTHIAN	GRASS	MEDIUM	334.67	Days
Days to Ripening	2010	CONQUEROR	CRAWLY	HAMPSHIRE	OAT	MEDIUM	298.33	Days
Days to Ripening	2010	CONQUEROR	FRAMLINGHAM	SUFFOLK	OILSEED RAPE	D-CLAY	290.67	Days
Days to Ripening	2010	CONQUEROR	FRISBYONTHEWREAKE	LEICESTERSHIRE	OILSEED RAPE	D-CLAY	300.33	Days
Days to Ripening	2012	CONQUEROR	CROFT-ON-TEES	NORTH YORKSHIRE	-	-	333	Days
Days to Ripening	2012	CONQUEROR	WELBOURN	LINCOLNSHIRE	-	-	328.67	Days
Days to Ripening	2012	CONQUEROR	HUMBIE	EAST LOTHIAN	-	-	349.33	Days
Days to Ripening	2012	CONQUEROR	HINSTOCK	SHROPSHIRE	-	-	319	Days
Days to Ripening	2012	CONQUEROR	ATTLEBRO	NORFOLK	-	-	280.67	Days
Days to Ripening	2013	CONQUEROR	WELBOURN	LINCOLNSHIRE	BARLEY	SHALLOW	321.33	Days
Days to Ripening	2013	CONQUEROR	EDGMOND	SHROPSHIRE	OAT	L-SAND	303.33	Days
Days to Ripening	2013	CONQUEROR	ALKERTON	OXFORDSHIRE	BARLEY	L-SAND	323	Days
Days to Ripening	2014	CONQUEROR	CROFT-ON-TEES	NORTH YORKSHIRE	BEANS	MEDIUM	316	Days
Days to Ripening	2014	CONQUEROR	MORLEYSTBOTOLPH	NORFOLK	OILSEED RAPE	MEDIUM	296	Days
Days to Ripening	2014	CONQUEROR	ALKERTON	OXFORDSHIRE	BEANS	L-SAND	313	Days
Days to Ripening	2014	CONQUEROR	WELBOURN	LINCOLNSHIRE	BARLEY	SHALLOW	304.33	Days
Days to Ripening	2014	CONQUEROR	EDGMOND	SHROPSHIRE	GRASS	MEDIUM	308.33	Days
Days to Ripening	2014	CONQUEROR	SANCTON	EAST RIDING OF YORKSHIRE	OILSEED RAPE	MEDIUM	305.67	Days
Days to Ripening	2002	CONSORT	WORKSOP	NOTTINGHAMSHIRE	-	-	301	Days
Days to Ripening	2002	CONSORT	SLEAFORD	LINCOLNSHIRE	-	-	296	Days
Days to Ripening	2002	CONSORT	FAKENHAM	NORFOLK	-	-	292	Days
Days to Ripening	2002	CONSORT	KINGSLYNN	NORFOLK	-	-	298	Days
Days to Ripening	2002	CONSORT	KETTG	NORTHAMPTONSHIRE	-	-	310	Days
Days to Ripening	2002	CONSORT	OLDM	ABERDEENSHIRE	-	-	346	Days
Days to Ripening	2002	CONSORT	WYMONDHAM	NORFOLK	-	-	308	Days
Days to Ripening	2002	CONSORT	SPALDING	LINCOLNSHIRE	-	-	287	Days
Days to Ripening	2002	CONSORT	OTLEY	SUFFOLK	-	-	302	Days
Days to Ripening	2002	CONSORT	ASHFD	KENT	-	-	312	Days
Days to Ripening	2002	CONSORT	TELFORD	SHROPSHIRE	-	-	314	Days
Days to Ripening	2002	CONSORT	WARMR	WILTSHIRE	-	-	314	Days
Days to Ripening	2002	CONSORT	COUPAR	PERTH AND KINROSS	-	-	327	Days
Days to Ripening	2002	CONSORT	WINCHESTER	HAMPSHIRE	-	-	312	Days
Days to Ripening	2002	CONSORT	WIMBOURNESTGILES	DORSET	-	-	292	Days
Days to Ripening	2002	CONSORT	ANNAN	DUMFRIES AND GALLOWAY	-	-	316	Days
Days to Ripening	2002	CONSORT	LIMAVADY	CAUSEWAY COAST AND GLENS	-	-	315	Days
Days to Ripening	2002	CONSORT	EDINB	CITY OF EDINBURGH	-	-	330	Days
Days to Ripening	2002	CONSORT	COLDSM	SCOTTISH BORDERS	-	-	322	Days
Days to Ripening	2002	CONSORT	CROFT-ON-TEES	NORTH YORKSHIRE	-	-	322	Days
Days to Ripening	2002	CONSORT	TADCASTER	NORTH YORKSHIRE	-	-	308	Days
Days to Ripening	2003	CONSORT	ABERDEEN	ABERDEENSHIRE	GRASS	SANDY CLAY LOAM	326.3	Days
Days to Ripening	2003	CONSORT	WORKSOP	NOTTINGHAMSHIRE	VEGETABLES	LIGHT SAND	308.3	Days
Days to Ripening	2003	CONSORT	WATERBEACH	CAMBRIDGESHIRE	PEAS	PEATY SOIL	280	Days
Days to Ripening	2003	CONSORT	FAKENHAM	NORFOLK	BEET	LIGHT SAND	282.7	Days
Days to Ripening	2003	CONSORT	ELGIN	MORAY	BARLEY	SANDY CLAY	320	Days
Days to Ripening	2003	CONSORT	WYMONDHAM	NORFOLK	WHEAT	MEDIUM	297.7	Days
Days to Ripening	2003	CONSORT	SPALDING	LINCOLNSHIRE	PEAS	DEEP FERTILE SILTY	279.7	Days
Days to Ripening	2003	CONSORT	CANTERBURY	KENT	OILSEED RAPE	DEEP FERTILE SILTY	311.7	Days
Days to Ripening	2003	CONSORT	MEMOW	LEICESTERSHIRE	OILSEED RAPE	DEEP CLAY	281	Days
Days to Ripening	2003	CONSORT	WINCHESTER	HAMPSHIRE	POPPY	MEDIUM	304	Days
Days to Ripening	2003	CONSORT	KINGSTON	DEVON	OAT	CLAY LOAM	304	Days
Days to Ripening	2003	CONSORT	LOCKERBIE	DUMFRIES AND GALLOWAY	BARLEY	LIGHT SAND	319	Days
Days to Ripening	2003	CONSORT	LIMAVADY	CAUSEWAY COAST AND GLENS	WHEAT	DEEP CLAY	314	Days
Days to Ripening	2003	CONSORT	HADDINGTON	EAST LOTHIAN	WHEAT	MEDIUM	311.7	Days
Days to Ripening	2003	CONSORT	DUNS	SCOTTISH BORDERS	OILSEED RAPE	DEEP CLAY	322.7	Days
Days to Ripening	2003	CONSORT	CROFT-ON-TEES	NORTH YORKSHIRE	POTATO	DEEP CLAY	316.3	Days
Days to Ripening	2003	CONSORT	TADCASTER	NORTH YORKSHIRE	POTATO	SHALLOW	307.3	Days
Days to Ripening	2004	CONSORT	LAURENCEKIRK	ABERDEENSHIRE	OILSEED RAPE	MEDIUM	344	Days
Days to Ripening	2004	CONSORT	RAGNALL	NOTTINGHAMSHIRE	OILSEED RAPE	MEDIUM	327	Days
Days to Ripening	2004	CONSORT	WATERBEACH	CAMBRIDGESHIRE	BEANS	ORGANIC	287.7	Days
Days to Ripening	2004	CONSORT	WOLFERTON	NORFOLK	BEANS	DEEP CLAY	309.7	Days
Days to Ripening	2004	CONSORT	GIRTON	CAMBRIDGESHIRE	BEANS	DEEP CLAY	302.7	Days
Days to Ripening	2004	CONSORT	WYE	KENT	OILSEED RAPE	MEDIUM	324	Days
Days to Ripening	2004	CONSORT	FRISBYONTHEWREAKE	LEICESTERSHIRE	PEAS	DEEP CLAY	303.7	Days
Days to Ripening	2004	CONSORT	COATES	GLOUCESTERSHIRE	WHEAT	SHALLOW	303.7	Days
Days to Ripening	2004	CONSORT	WARWICK	WARWICKSHIRE	WHEAT	DEEP CLAY	304	Days
Days to Ripening	2004	CONSORT	UPSOMBORNE	HAMPSHIRE	PEAS	MEDIUM	313	Days
Days to Ripening	2004	CONSORT	LIMAVADY	CAUSEWAY COAST AND GLENS	WHEAT	DEEP CLAY	327	Days
Days to Ripening	2004	CONSORT	HUMBIE	EAST LOTHIAN	WHEAT	MEDIUM	332	Days
Days to Ripening	2004	CONSORT	BOWSDN	NORTHUMBERLAND	WHEAT	DEEP CLAY	330.5	Days
Days to Ripening	2004	CONSORT	BRAMHAM	LEEDS	OILSEED RAPE	MEDIUM	311	Days
Days to Ripening	2005	CONSORT	RAGNALL	NOTTINGHAMSHIRE	OILSEED RAPE	MEDIUM	320	Days
Days to Ripening	2005	CONSORT	CTHORPE	LINCOLNSHIRE	LINSEED	MEDIUM	273	Days
Days to Ripening	2005	CONSORT	WATERBEACH	CAMBRIDGESHIRE	BEANS	ORGANIC	292.3	Days
Days to Ripening	2005	CONSORT	WOLFERTON	NORFOLK	BEANS	DEEP CLAY	303	Days
Days to Ripening	2005	CONSORT	HISTON	CAMBRIDGESHIRE	BEANS	DEEP CLAY	286.7	Days
Days to Ripening	2005	CONSORT	ELGIN	MORAY	POTATO	MEDIUM	317.7	Days
Days to Ripening	2005	CONSORT	SPALDING	LINCOLNSHIRE	VEGETABLES	DEEP FERTILE SILTY	284.3	Days
Days to Ripening	2005	CONSORT	FRAMLINGHAM	SUFFOLK	PEAS	DEEP CLAY	284.3	Days
Days to Ripening	2005	CONSORT	NEWCHURCH	KENT	PEAS	DEEP CLAY	315	Days
Days to Ripening	2005	CONSORT	TELFORD	SHROPSHIRE	OILSEED RAPE	MEDIUM	302.7	Days
Days to Ripening	2005	CONSORT	FRISBYONTHEWREAKE	LEICESTERSHIRE	PEAS	DEEP CLAY	298.3	Days
Days to Ripening	2005	CONSORT	RHYND	PERTH AND KINROSS	WHEAT	MEDIUM	331.7	Days
Days to Ripening	2005	CONSORT	UPSOMBORNE	HAMPSHIRE	GRASS	MEDIUM	306.7	Days
Days to Ripening	2005	CONSORT	INCEBLUNDELL	SEFTON	OAT	LIGHT SAND	313	Days
Days to Ripening	2005	CONSORT	LOCKERBIE	DUMFRIES AND GALLOWAY	BARLEY	LIGHT SAND	314	Days
Days to Ripening	2005	CONSORT	HUMBIE	EAST LOTHIAN	OILSEED RAPE	MEDIUM	336.3	Days
Days to Ripening	2005	CONSORT	WHITSOME	SCOTTISH BORDERS	WHEAT	DEEP CLAY	326	Days
Days to Ripening	2005	CONSORT	BOWSDN	NORTHUMBERLAND	WHEAT	DEEP CLAY	331	Days
Days to Ripening	2005	CONSORT	BARTHORPE	NORTH YORKSHIRE	OILSEED RAPE	DEEP CLAY	324	Days
Days to Ripening	2005	CONSORT	HHALL	LEEDS	OILSEED RAPE	SHALLOW	300	Days
Days to Ripening	2006	CONSORT	WOLFERTON	NORFOLK	-	-	290.67	Days
Days to Ripening	2006	CONSORT	HUMBIE	EAST LOTHIAN	-	-	318	Days
Days to Ripening	2006	CONSORT	TELFORD	SHROPSHIRE	-	-	304.33	Days
Days to Ripening	2006	CONSORT	CRAMBE	NORTH YORKSHIRE	-	-	304.67	Days
Days to Ripening	2006	CONSORT	LIMAVADY	CAUSEWAY COAST AND GLENS	-	-	321	Days
Days to Ripening	2006	CONSORT	LAURENCEKIRK	ABERDEENSHIRE	-	-	332.67	Days
Days to Ripening	2006	CONSORT	ELGIN	MORAY	-	-	330	Days
Days to Ripening	2006	CONSORT	W-CHARLT	DEVON	-	-	303	Days
Days to Ripening	2006	CONSORT	RHYND	PERTH AND KINROSS	-	-	318.67	Days
Days to Ripening	2006	CONSORT	T-RAWSTN	DORSET	-	-	279.67	Days
Days to Ripening	2006	CONSORT	LOCKERBIE	DUMFRIES AND GALLOWAY	-	-	313.67	Days
Days to Ripening	2006	CONSORT	MORLEYSTBOTOLPH	NORFOLK	-	-	290	Days
Days to Ripening	2006	CONSORT	HYTHE	KENT	-	-	302	Days
Days to Ripening	2006	CONSORT	BOWSDN	NORTHUMBERLAND	-	-	316	Days
Days to Ripening	2006	CONSORT	RAGNALL	NOTTINGHAMSHIRE	-	-	304.33	Days
Days to Ripening	2006	CONSORT	HISTON	CAMBRIDGESHIRE	-	-	292	Days
Days to Ripening	2006	CONSORT	FRAMLINGHAM	SUFFOLK	-	-	301	Days
Days to Ripening	2006	CONSORT	FRISBYONTHEWREAKE	LEICESTERSHIRE	-	-	296.33	Days
Days to Ripening	2006	CONSORT	SPALDING	LINCOLNSHIRE	-	-	293	Days
Days to Ripening	2007	CONSORT	LAURENCEKIRK	ABERDEENSHIRE	-	-	333.33	Days
Days to Ripening	2007	CONSORT	POTTN	ABERDEENSHIRE	-	-	357	Days
Days to Ripening	2007	CONSORT	BOWSDN	NORTHUMBERLAND	-	-	323	Days
Days to Ripening	2007	CONSORT	HUMBIE	EAST LOTHIAN	-	-	336.33	Days
Days to Ripening	2003	CORDIALE	ABERDEEN	ABERDEENSHIRE	GRASS	SANDY CLAY LOAM	326.3	Days
Days to Ripening	2003	CORDIALE	WORKSOP	NOTTINGHAMSHIRE	VEGETABLES	LIGHT SAND	303	Days
Days to Ripening	2003	CORDIALE	WATERBEACH	CAMBRIDGESHIRE	PEAS	PEATY SOIL	275.3	Days
Days to Ripening	2003	CORDIALE	FAKENHAM	NORFOLK	BEET	LIGHT SAND	278	Days
Days to Ripening	2003	CORDIALE	ELGIN	MORAY	BARLEY	SANDY CLAY	322.7	Days
Days to Ripening	2003	CORDIALE	WYMONDHAM	NORFOLK	WHEAT	MEDIUM	290	Days
Days to Ripening	2003	CORDIALE	SPALDING	LINCOLNSHIRE	PEAS	DEEP FERTILE SILTY	276.3	Days
Days to Ripening	2003	CORDIALE	CANTERBURY	KENT	OILSEED RAPE	DEEP FERTILE SILTY	307.7	Days
Days to Ripening	2003	CORDIALE	MEMOW	LEICESTERSHIRE	OILSEED RAPE	DEEP CLAY	274.3	Days
Days to Ripening	2003	CORDIALE	WINCHESTER	HAMPSHIRE	POPPY	MEDIUM	298	Days
Days to Ripening	2003	CORDIALE	KINGSTON	DEVON	OAT	CLAY LOAM	300	Days
Days to Ripening	2003	CORDIALE	LOCKERBIE	DUMFRIES AND GALLOWAY	BARLEY	LIGHT SAND	316.3	Days
Days to Ripening	2003	CORDIALE	LIMAVADY	CAUSEWAY COAST AND GLENS	WHEAT	DEEP CLAY	314	Days
Days to Ripening	2003	CORDIALE	HADDINGTON	EAST LOTHIAN	WHEAT	MEDIUM	309.7	Days
Days to Ripening	2003	CORDIALE	DUNS	SCOTTISH BORDERS	OILSEED RAPE	DEEP CLAY	320	Days
Days to Ripening	2003	CORDIALE	CROFT-ON-TEES	NORTH YORKSHIRE	POTATO	DEEP CLAY	310.3	Days
Days to Ripening	2003	CORDIALE	TADCASTER	NORTH YORKSHIRE	POTATO	SHALLOW	304	Days
Days to Ripening	2004	CORDIALE	LAURENCEKIRK	ABERDEENSHIRE	OILSEED RAPE	MEDIUM	335.3	Days
Days to Ripening	2004	CORDIALE	RAGNALL	NOTTINGHAMSHIRE	OILSEED RAPE	MEDIUM	325	Days
Days to Ripening	2004	CORDIALE	WATERBEACH	CAMBRIDGESHIRE	BEANS	ORGANIC	285	Days
Days to Ripening	2004	CORDIALE	WOLFERTON	NORFOLK	BEANS	DEEP CLAY	305	Days
Days to Ripening	2004	CORDIALE	GIRTON	CAMBRIDGESHIRE	BEANS	DEEP CLAY	299.7	Days
Days to Ripening	2004	CORDIALE	WYE	KENT	OILSEED RAPE	MEDIUM	317	Days
Days to Ripening	2004	CORDIALE	FRISBYONTHEWREAKE	LEICESTERSHIRE	PEAS	DEEP CLAY	297	Days
Days to Ripening	2004	CORDIALE	COATES	GLOUCESTERSHIRE	WHEAT	SHALLOW	297.7	Days
Days to Ripening	2004	CORDIALE	WARWICK	WARWICKSHIRE	WHEAT	DEEP CLAY	300	Days
Days to Ripening	2004	CORDIALE	UPSOMBORNE	HAMPSHIRE	PEAS	MEDIUM	309	Days
Days to Ripening	2004	CORDIALE	LIMAVADY	CAUSEWAY COAST AND GLENS	WHEAT	DEEP CLAY	327	Days
Days to Ripening	2004	CORDIALE	HUMBIE	EAST LOTHIAN	WHEAT	MEDIUM	329.7	Days
Days to Ripening	2004	CORDIALE	BOWSDN	NORTHUMBERLAND	WHEAT	DEEP CLAY	325.5	Days
Days to Ripening	2004	CORDIALE	BRAMHAM	LEEDS	OILSEED RAPE	MEDIUM	311	Days
Days to Ripening	2005	CORDIALE	RAGNALL	NOTTINGHAMSHIRE	OILSEED RAPE	MEDIUM	312.7	Days
Days to Ripening	2005	CORDIALE	CTHORPE	LINCOLNSHIRE	LINSEED	MEDIUM	268.3	Days
Days to Ripening	2005	CORDIALE	WATERBEACH	CAMBRIDGESHIRE	BEANS	ORGANIC	291	Days
Days to Ripening	2005	CORDIALE	WOLFERTON	NORFOLK	BEANS	DEEP CLAY	296.7	Days
Days to Ripening	2005	CORDIALE	HISTON	CAMBRIDGESHIRE	BEANS	DEEP CLAY	286	Days
Days to Ripening	2005	CORDIALE	ELGIN	MORAY	POTATO	MEDIUM	310.7	Days
Days to Ripening	2005	CORDIALE	SPALDING	LINCOLNSHIRE	VEGETABLES	DEEP FERTILE SILTY	282.7	Days
Days to Ripening	2005	CORDIALE	FRAMLINGHAM	SUFFOLK	PEAS	DEEP CLAY	277	Days
Days to Ripening	2005	CORDIALE	NEWCHURCH	KENT	PEAS	DEEP CLAY	311	Days
Days to Ripening	2005	CORDIALE	TELFORD	SHROPSHIRE	OILSEED RAPE	MEDIUM	297	Days
Days to Ripening	2005	CORDIALE	FRISBYONTHEWREAKE	LEICESTERSHIRE	PEAS	DEEP CLAY	293	Days
Days to Ripening	2005	CORDIALE	RHYND	PERTH AND KINROSS	WHEAT	MEDIUM	331.7	Days
Days to Ripening	2005	CORDIALE	UPSOMBORNE	HAMPSHIRE	GRASS	MEDIUM	300	Days
Days to Ripening	2005	CORDIALE	INCEBLUNDELL	SEFTON	OAT	LIGHT SAND	311.7	Days
Days to Ripening	2005	CORDIALE	LOCKERBIE	DUMFRIES AND GALLOWAY	BARLEY	LIGHT SAND	312.3	Days
Days to Ripening	2005	CORDIALE	HUMBIE	EAST LOTHIAN	OILSEED RAPE	MEDIUM	336	Days
Days to Ripening	2005	CORDIALE	WHITSOME	SCOTTISH BORDERS	WHEAT	DEEP CLAY	323.3	Days
Days to Ripening	2005	CORDIALE	BOWSDN	NORTHUMBERLAND	WHEAT	DEEP CLAY	331	Days
Days to Ripening	2005	CORDIALE	BARTHORPE	NORTH YORKSHIRE	OILSEED RAPE	DEEP CLAY	319	Days
Days to Ripening	2005	CORDIALE	HHALL	LEEDS	OILSEED RAPE	SHALLOW	293.7	Days
Days to Ripening	2006	CORDIALE	WOLFERTON	NORFOLK	-	-	284.33	Days
Days to Ripening	2006	CORDIALE	HUMBIE	EAST LOTHIAN	-	-	314.67	Days
Days to Ripening	2006	CORDIALE	TELFORD	SHROPSHIRE	-	-	304	Days
Days to Ripening	2006	CORDIALE	CRAMBE	NORTH YORKSHIRE	-	-	299	Days
Days to Ripening	2006	CORDIALE	LIMAVADY	CAUSEWAY COAST AND GLENS	-	-	319	Days
Days to Ripening	2006	CORDIALE	LAURENCEKIRK	ABERDEENSHIRE	-	-	324.67	Days
Days to Ripening	2006	CORDIALE	ELGIN	MORAY	-	-	326	Days
Days to Ripening	2006	CORDIALE	W-CHARLT	DEVON	-	-	303	Days
Days to Ripening	2006	CORDIALE	RHYND	PERTH AND KINROSS	-	-	315.33	Days
Days to Ripening	2006	CORDIALE	T-RAWSTN	DORSET	-	-	281	Days
Days to Ripening	2006	CORDIALE	LOCKERBIE	DUMFRIES AND GALLOWAY	-	-	310.67	Days
Days to Ripening	2006	CORDIALE	MORLEYSTBOTOLPH	NORFOLK	-	-	288	Days
Days to Ripening	2006	CORDIALE	HYTHE	KENT	-	-	302.67	Days
Days to Ripening	2006	CORDIALE	BOWSDN	NORTHUMBERLAND	-	-	318.67	Days
Days to Ripening	2006	CORDIALE	RAGNALL	NOTTINGHAMSHIRE	-	-	299	Days
Days to Ripening	2006	CORDIALE	HISTON	CAMBRIDGESHIRE	-	-	288	Days
Days to Ripening	2006	CORDIALE	FRAMLINGHAM	SUFFOLK	-	-	296	Days
Days to Ripening	2006	CORDIALE	FRISBYONTHEWREAKE	LEICESTERSHIRE	-	-	293	Days
Days to Ripening	2006	CORDIALE	SPALDING	LINCOLNSHIRE	-	-	293	Days
Days to Ripening	2007	CORDIALE	WOLFERTON	NORFOLK	-	-	297.33	Days
Days to Ripening	2007	CORDIALE	C-CREEVY	BELFAST	-	-	315	Days
Days to Ripening	2007	CORDIALE	LAURENCEKIRK	ABERDEENSHIRE	-	-	325.33	Days
Days to Ripening	2007	CORDIALE	ULCEBY	NORTH LINCOLNSHIRE	-	-	286.33	Days
Days to Ripening	2007	CORDIALE	POTTN	ABERDEENSHIRE	-	-	351.67	Days
Days to Ripening	2007	CORDIALE	HYTHE	KENT	-	-	299.67	Days
Days to Ripening	2007	CORDIALE	BOWSDN	NORTHUMBERLAND	-	-	318.33	Days
Days to Ripening	2007	CORDIALE	HISTON	CAMBRIDGESHIRE	-	-	296	Days
Days to Ripening	2007	CORDIALE	SPALDING	LINCOLNSHIRE	-	-	293.67	Days
Days to Ripening	2007	CORDIALE	HUMBIE	EAST LOTHIAN	-	-	334.33	Days
Days to Ripening	2007	CORDIALE	CRAMBE	NORTH YORKSHIRE	-	-	311.33	Days
Days to Ripening	2007	CORDIALE	HULL	EAST RIDING OF YORKSHIRE	-	-	293	Days
Days to Ripening	2007	CORDIALE	RUDSTON	EAST RIDING OF YORKSHIRE	-	-	312.33	Days
Days to Ripening	2007	CORDIALE	UPSOMBORNE	HAMPSHIRE	-	-	310.33	Days
Days to Ripening	2008	CORDIALE	WOLFERTON	NORFOLK	-	-	294.67	Days
Days to Ripening	2008	CORDIALE	DYCE	ABERDEENSHIRE	-	-	337.67	Days
Days to Ripening	2008	CORDIALE	HYTHE	KENT	-	-	303.67	Days
Days to Ripening	2008	CORDIALE	BOWSDN	NORTHUMBERLAND	-	-	311.67	Days
Days to Ripening	2008	CORDIALE	WELBOURN	LINCOLNSHIRE	-	-	321	Days
Days to Ripening	2008	CORDIALE	CAMBRIDGE	CAMBRIDGESHIRE	-	-	312	Days
Days to Ripening	2008	CORDIALE	HUMBIE	EAST LOTHIAN	-	-	333	Days
Days to Ripening	2008	CORDIALE	BUGTHORPE	NORTH YORKSHIRE	-	-	302	Days
Days to Ripening	2008	CORDIALE	BURY-STE	SUFFOLK	-	-	289.67	Days
Days to Ripening	2008	CORDIALE	LAURENCEKIRK	ABERDEENSHIRE	-	-	332	Days
Days to Ripening	2008	CORDIALE	BINBROOK	NORTH LINCOLNSHIRE	-	-	321	Days
Days to Ripening	2009	CORDIALE	CROFT-ON-TEES	NORTH YORKSHIRE	BEANS	MEDIUM	322.33	Days
Days to Ripening	2009	CORDIALE	ULCEBY	NORTH LINCOLNSHIRE	OILSEED RAPE	D-CLAY	286	Days
Days to Ripening	2009	CORDIALE	DYCE	ABERDEENSHIRE	BARLEY	L-SAND	329	Days
Days to Ripening	2009	CORDIALE	HYTHE	KENT	OILSEED RAPE	D-CLAY	296.33	Days
Days to Ripening	2009	CORDIALE	WELBOURN	LINCOLNSHIRE	OILSEED RAPE	SHALLOW	314	Days
Days to Ripening	2009	CORDIALE	BEAUSALE	WARWICKSHIRE	OILSEED RAPE	D-CLAY	303	Days
Days to Ripening	2009	CORDIALE	GIRTON	CAMBRIDGESHIRE	OTHER	MEDIUM	296.33	Days
Days to Ripening	2009	CORDIALE	HOLBEACH	LINCOLNSHIRE	OTHER	D-SILT	280.67	Days
Days to Ripening	2009	CORDIALE	RUDSTON	EAST RIDING OF YORKSHIRE	OILSEED RAPE	SHALLOW	299.67	Days
Days to Ripening	2009	CORDIALE	WINCHESTER	HAMPSHIRE	PEAS	MEDIUM	289.33	Days
Days to Ripening	2009	CORDIALE	FRAMLINGHAM	SUFFOLK	OILSEED RAPE	D-CLAY	292.67	Days
Days to Ripening	2009	CORDIALE	LAURENCEKIRK	ABERDEENSHIRE	OILSEED RAPE	MEDIUM	344.33	Days
Days to Ripening	2010	CORDIALE	CROFT-ON-TEES	NORTH YORKSHIRE	BEANS	MEDIUM	326.33	Days
Days to Ripening	2010	CORDIALE	WELBOURN	LINCOLNSHIRE	OILSEED RAPE	SHALLOW	315	Days
Days to Ripening	2010	CORDIALE	HASELY	WARWICKSHIRE	OILSEED RAPE	MEDIUM	304.33	Days
Days to Ripening	2010	CORDIALE	GIRTON	CAMBRIDGESHIRE	BEANS	MEDIUM	295	Days
Days to Ripening	2010	CORDIALE	HUMBIE	EAST LOTHIAN	GRASS	MEDIUM	328.33	Days
Days to Ripening	2010	CORDIALE	CRAWLY	HAMPSHIRE	OAT	MEDIUM	293.67	Days
Days to Ripening	2012	CORDIALE	CROFT-ON-TEES	NORTH YORKSHIRE	-	-	330.33	Days
Days to Ripening	2012	CORDIALE	ELLON	ABERDEENSHIRE	-	-	340.33	Days
Days to Ripening	2012	CORDIALE	ST-BOSW	SCOTTISH BORDERS	-	-	341	Days
Days to Ripening	2012	CORDIALE	BALGONIE	FIFE	-	-	345	Days
Days to Ripening	2012	CORDIALE	STCHWRTH	CAMBRIDGESHIRE	-	-	297	Days
Days to Ripening	2012	CORDIALE	ULCEBY	NORTH LINCOLNSHIRE	-	-	318	Days
Days to Ripening	2012	CORDIALE	LUTHERMR	ABERDEENSHIRE	-	-	337.33	Days
Days to Ripening	2012	CORDIALE	PETHAM	KENT	-	-	306.33	Days
Days to Ripening	2012	CORDIALE	WELBOURN	LINCOLNSHIRE	-	-	324.67	Days
Days to Ripening	2012	CORDIALE	HUMBIE	EAST LOTHIAN	-	-	347	Days
Days to Ripening	2012	CORDIALE	HINSTOCK	SHROPSHIRE	-	-	319.67	Days
Days to Ripening	2012	CORDIALE	LYMM	CHESHIRE EAST	-	-	314	Days
Days to Ripening	2012	CORDIALE	BARTHORPE	NORTH YORKSHIRE	-	-	319.33	Days
Days to Ripening	2012	CORDIALE	FRAMLINGHAM	SUFFOLK	-	-	315	Days
Days to Ripening	2012	CORDIALE	ATTLEBRO	NORFOLK	-	-	284	Days
Days to Ripening	2012	CORDIALE	ICKLETON	CAMBRIDGESHIRE	-	-	297	Days
Days to Ripening	2013	CORDIALE	STOWMARKET	SUFFOLK	WHEAT	D-CLAY	296.33	Days
Days to Ripening	2013	CORDIALE	ULCEBY	NORTH LINCOLNSHIRE	OILSEED RAPE	D-CLAY	316	Days
Days to Ripening	2013	CORDIALE	LUTHERMR	ABERDEENSHIRE	WHEAT	MEDIUM	287	Days
Days to Ripening	2013	CORDIALE	WELBOURN	LINCOLNSHIRE	BARLEY	SHALLOW	314.67	Days
Days to Ripening	2013	CORDIALE	MOULTON	LINCOLNSHIRE	PEAS	D-SILT	300	Days
Days to Ripening	2013	CORDIALE	EDGMOND	SHROPSHIRE	OAT	L-SAND	302	Days
Days to Ripening	2013	CORDIALE	ICKLETON	CAMBRIDGESHIRE	WHEAT	MEDIUM	269.33	Days
Days to Ripening	2013	CORDIALE	ELLON	ABERDEENSHIRE	BARLEY	L-SAND	326.67	Days
Days to Ripening	2013	CORDIALE	ST-BOSW	SCOTTISH BORDERS	POTATO	L-SAND	318	Days
Days to Ripening	2013	CORDIALE	BALGONIE	FIFE	OAT	L-SAND	315	Days
Days to Ripening	2013	CORDIALE	ALKERTON	OXFORDSHIRE	BARLEY	L-SAND	323	Days
Days to Ripening	2014	CORDIALE	CROFT-ON-TEES	NORTH YORKSHIRE	BEANS	MEDIUM	316	Days
Days to Ripening	2014	CORDIALE	MORLEYSTBOTOLPH	NORFOLK	OILSEED RAPE	MEDIUM	296	Days
Days to Ripening	2014	CORDIALE	ICKLETON	CAMBRIDGESHIRE	WHEAT	MEDIUM	291	Days
Days to Ripening	2014	CORDIALE	AUCHNAGATT	ABERDEENSHIRE	WHEAT	L-SAND	336.67	Days
Days to Ripening	2014	CORDIALE	ST-BOSW	SCOTTISH BORDERS	POTATO	L-SAND	319	Days
Days to Ripening	2014	CORDIALE	BALGONIE	FIFE	OILSEED RAPE	L-SAND	326.67	Days
Days to Ripening	2014	CORDIALE	ALKERTON	OXFORDSHIRE	BEANS	L-SAND	311.67	Days
Days to Ripening	2014	CORDIALE	ULCEBY	NORTH LINCOLNSHIRE	OILSEED RAPE	D-CLAY	310.33	Days
Days to Ripening	2014	CORDIALE	LUTHERMR	ABERDEENSHIRE	POTATO	MEDIUM	306.67	Days
Days to Ripening	2014	CORDIALE	PETHAM	KENT	OAT	MEDIUM	285.67	Days
Days to Ripening	2014	CORDIALE	WELBOURN	LINCOLNSHIRE	BARLEY	SHALLOW	304.33	Days
Days to Ripening	2014	CORDIALE	MOULTON	LINCOLNSHIRE	VEGETABLES	D-SILT	296.67	Days
Days to Ripening	2014	CORDIALE	HLEGH	CHESHIRE EAST	WHEAT	MEDIUM	308.67	Days
Days to Ripening	2014	CORDIALE	EDGMOND	SHROPSHIRE	GRASS	MEDIUM	307.67	Days
Days to Ripening	2014	CORDIALE	BARTHORPE	NORTH YORKSHIRE	OILSEED RAPE	D-CLAY	303	Days
Days to Ripening	2014	CORDIALE	SANCTON	EAST RIDING OF YORKSHIRE	OILSEED RAPE	MEDIUM	301.67	Days
Days to Ripening	2014	CORDIALE	BEDFIELD	SUFFOLK	OILSEED RAPE	D-CLAY	297	Days
Days to Ripening	2014	CORDIALE	FRISBYONTHEWREAKE	LEICESTERSHIRE	OILSEED RAPE	D-CLAY	290	Days
Days to Ripening	2015	CORDIALE	BARNSTON	ESSEX	WHEAT	D-CLAY	282.67	Days
Days to Ripening	2015	CORDIALE	LIMAVADY	CAUSEWAY COAST AND GLENS	OILSEED RAPE	MEDIUM	332	Days
Days to Ripening	2015	CORDIALE	ICKLETON	CAMBRIDGESHIRE	WHEAT	MEDIUM	293	Days
Days to Ripening	2015	CORDIALE	AUCHNAGATT	ABERDEENSHIRE	BARLEY	L-SAND	358.67	Days
Days to Ripening	2015	CORDIALE	ST-BOSW	SCOTTISH BORDERS	OILSEED RAPE	L-SAND	337.67	Days
Days to Ripening	2015	CORDIALE	BALGONIE	FIFE	OILSEED RAPE	L-SAND	342.33	Days
Days to Ripening	2015	CORDIALE	ALKERTON	OXFORDSHIRE	BEANS	L-SAND	310	Days
Days to Ripening	2015	CORDIALE	CAWOOD	NORTH YORKSHIRE	BEANS	MEDIUM	314	Days
Days to Ripening	2015	CORDIALE	ULCEBY	NORTH LINCOLNSHIRE	OILSEED RAPE	D-CLAY	322	Days
Days to Ripening	2015	CORDIALE	LUTHERMR	ABERDEENSHIRE	POTATO	MEDIUM	337	Days
Days to Ripening	2015	CORDIALE	WYE	KENT	BEANS	MEDIUM	273	Days
Days to Ripening	2015	CORDIALE	CROFT-ON-TEES	NORTH YORKSHIRE	BEANS	MEDIUM	331	Days
Days to Ripening	2015	CORDIALE	ELMSWELL	SUFFOLK	OILSEED RAPE	MEDIUM	333.33	Days
Days to Ripening	2015	CORDIALE	WELBOURN	LINCOLNSHIRE	BARLEY	SHALLOW	322	Days
Days to Ripening	2015	CORDIALE	HUMBIE	EAST LOTHIAN	OILSEED RAPE	MEDIUM	347.33	Days
Days to Ripening	2015	CORDIALE	HLEGH	CHESHIRE EAST	WHEAT	MEDIUM	317	Days
Days to Ripening	2015	CORDIALE	BEDFIELD	SUFFOLK	BEANS	D-CLAY	308.67	Days
Days to Ripening	2015	CORDIALE	FRISBYONTHEWREAKE	LEICESTERSHIRE	OILSEED RAPE	D-CLAY	304	Days
Days to Ripening	2015	CORDIALE	MORLEYSTBOTOLPH	NORFOLK	OILSEED RAPE	MEDIUM	300	Days
Days to Ripening	2016	CORDIALE	THAXTED	ESSEX	OILSEED RAPE	D-CLAY	289.5	Days
Days to Ripening	2016	CORDIALE	LIMAVADY	CAUSEWAY COAST AND GLENS	POTATO	D-SILT	314.33	Days
Days to Ripening	2016	CORDIALE	ICKLETON	CAMBRIDGESHIRE	WHEAT	MEDIUM	296	Days
Days to Ripening	2016	CORDIALE	AUCHNAGATT	ABERDEENSHIRE	BARLEY	L-SAND	347.33	Days
Days to Ripening	2016	CORDIALE	ST-BOSW	SCOTTISH BORDERS	POTATO	L-SAND	339	Days
Days to Ripening	2016	CORDIALE	BALGONIE	FIFE	OAT	L-SAND	334	Days
Days to Ripening	2016	CORDIALE	CAWOOD	NORTH YORKSHIRE	BEANS	MEDIUM	307	Days
Days to Ripening	2016	CORDIALE	ULCEBY	NORTH LINCOLNSHIRE	OILSEED RAPE	D-CLAY	313.67	Days
Days to Ripening	2016	CORDIALE	BRECHIN	ANGUS	OILSEED RAPE	MEDIUM	337	Days
Days to Ripening	2016	CORDIALE	PETHAM	KENT	BEANS	MEDIUM	301.67	Days
Days to Ripening	2016	CORDIALE	ELMSWELL	SUFFOLK	OILSEED RAPE	MEDIUM	317	Days
Days to Ripening	2016	CORDIALE	WELBOURN	LINCOLNSHIRE	OILSEED RAPE	SHALLOW	318.33	Days
Days to Ripening	2016	CORDIALE	BAINTON	EAST RIDING OF YORKSHIRE	OILSEED RAPE	MEDIUM	312	Days
Days to Ripening	2016	CORDIALE	PINCHBECK	LINCOLNSHIRE	POTATO	D-SILT	290	Days
Days to Ripening	2016	CORDIALE	HUMBIE	EAST LOTHIAN	OILSEED RAPE	MEDIUM	342.67	Days
Days to Ripening	2016	CORDIALE	TIBTHORPE	EAST RIDING OF YORKSHIRE	OILSEED RAPE	MEDIUM	319	Days
Days to Ripening	2016	CORDIALE	HLEGH	CHESHIRE EAST	WHEAT	MEDIUM	301.67	Days
Days to Ripening	2016	CORDIALE	FRISBYONTHEWREAKE	LEICESTERSHIRE	OILSEED RAPE	D-CLAY	308.33	Days
Days to Ripening	2017	CORDIALE	THAXTED	ESSEX	OILSEED RAPE	D-CLAY	270.67	Days
Days to Ripening	2017	CORDIALE	CALLOW	HEREFORDSHIRE	COUNTY OF	OILSEED RAPE	312.33	Days
Days to Ripening	2017	CORDIALE	COWBRIDGE	VALE OF GLAMORGAN	OILSEED RAPE	MEDIUM	293	Days
Days to Ripening	2017	CORDIALE	FRIDAYTHORPE	NORTH YORKSHIRE	PEAS	SHALLOW	317.67	Days
Days to Ripening	2017	CORDIALE	EASTMLLNG	KENT	OAT	MEDIUM	269	Days
Days to Ripening	2017	CORDIALE	DEOPHAM	NORFOLK	PEAS	MEDIUM	303.67	Days
Days to Ripening	2017	CORDIALE	LIMAVADY	CAUSEWAY COAST AND GLENS	OILSEED RAPE	MEDIUM	293	Days
Days to Ripening	2017	CORDIALE	ICKLETON	CAMBRIDGESHIRE	WHEAT	MEDIUM	277.33	Days
Days to Ripening	2017	CORDIALE	BALGONIE	FIFE	OAT	L-SAND	331	Days
Days to Ripening	2017	CORDIALE	KELSO	SCOTTISH BORDERS	POTATO	L-SAND	322.33	Days
Days to Ripening	2017	CORDIALE	ULCEBY	NORTH LINCOLNSHIRE	OILSEED RAPE	D-CLAY	283	Days
Days to Ripening	2017	CORDIALE	CROFT-ON-TEES	NORTH YORKSHIRE	OILSEED RAPE	MEDIUM	326	Days
Days to Ripening	2017	CORDIALE	BRECHIN	ANGUS	OILSEED RAPE	MEDIUM	338	Days
Days to Ripening	2017	CORDIALE	ELGIN	MORAY	POTATO	L-SAND	310.67	Days
Days to Ripening	2017	CORDIALE	HLEGH	CHESHIRE EAST	WHEAT	MEDIUM	296.33	Days
Days to Ripening	2017	CORDIALE	WELBOURN	LINCOLNSHIRE	OILSEED RAPE	SHALLOW	313.33	Days
Days to Ripening	2017	CORDIALE	BURDON	SUNDERLAND	OILSEED RAPE	MEDIUM	321	Days
Days to Ripening	2017	CORDIALE	SPALDING	LINCOLNSHIRE	PEAS	D-SILT	286	Days
Days to Ripening	2017	CORDIALE	SALTOUN	EAST LOTHIAN	OILSEED RAPE	MEDIUM	344.33	Days
Days to Ripening	2017	CORDIALE	FRSTHRP	LINCOLNSHIRE	OILSEED RAPE	D-CLAY	294	Days
Days to Ripening	2017	CORDIALE	NORTHDALTON	EAST RIDING OF YORKSHIRE	OILSEED RAPE	MEDIUM	316	Days
Days to Ripening	2017	CORDIALE	EDGMOND	SHROPSHIRE	OILSEED RAPE	MEDIUM	290.33	Days
Days to Ripening	2015	COSTELLO	BARNSTON	ESSEX	WHEAT	D-CLAY	289	Days
Days to Ripening	2015	COSTELLO	LIMAVADY	CAUSEWAY COAST AND GLENS	OILSEED RAPE	MEDIUM	332	Days
Days to Ripening	2015	COSTELLO	ICKLETON	CAMBRIDGESHIRE	WHEAT	MEDIUM	297.67	Days
Days to Ripening	2015	COSTELLO	ST-BOSW	SCOTTISH BORDERS	OILSEED RAPE	L-SAND	339.67	Days
Days to Ripening	2015	COSTELLO	BALGONIE	FIFE	OILSEED RAPE	L-SAND	345.67	Days
Days to Ripening	2015	COSTELLO	ALKERTON	OXFORDSHIRE	BEANS	L-SAND	310	Days
Days to Ripening	2015	COSTELLO	CAWOOD	NORTH YORKSHIRE	BEANS	MEDIUM	320	Days
Days to Ripening	2015	COSTELLO	ULCEBY	NORTH LINCOLNSHIRE	OILSEED RAPE	D-CLAY	324.67	Days
Days to Ripening	2015	COSTELLO	LUTHERMR	ABERDEENSHIRE	POTATO	MEDIUM	339	Days
Days to Ripening	2015	COSTELLO	WYE	KENT	BEANS	MEDIUM	279.67	Days
Days to Ripening	2015	COSTELLO	CROFT-ON-TEES	NORTH YORKSHIRE	BEANS	MEDIUM	335.67	Days
Days to Ripening	2015	COSTELLO	ELMSWELL	SUFFOLK	OILSEED RAPE	MEDIUM	331.33	Days
Days to Ripening	2015	COSTELLO	WELBOURN	LINCOLNSHIRE	BARLEY	SHALLOW	322	Days
Days to Ripening	2015	COSTELLO	HUMBIE	EAST LOTHIAN	OILSEED RAPE	MEDIUM	352.33	Days
Days to Ripening	2015	COSTELLO	HLEGH	CHESHIRE EAST	WHEAT	MEDIUM	319	Days
Days to Ripening	2015	COSTELLO	BEDFIELD	SUFFOLK	BEANS	D-CLAY	311.67	Days
Days to Ripening	2015	COSTELLO	FRISBYONTHEWREAKE	LEICESTERSHIRE	OILSEED RAPE	D-CLAY	310.33	Days
Days to Ripening	2015	COSTELLO	MORLEYSTBOTOLPH	NORFOLK	OILSEED RAPE	MEDIUM	304.67	Days
Days to Ripening	2016	COSTELLO	THAXTED	ESSEX	OILSEED RAPE	D-CLAY	294.33	Days
Days to Ripening	2016	COSTELLO	LIMAVADY	CAUSEWAY COAST AND GLENS	POTATO	D-SILT	309.33	Days
Days to Ripening	2016	COSTELLO	ICKLETON	CAMBRIDGESHIRE	WHEAT	MEDIUM	300.33	Days
Days to Ripening	2016	COSTELLO	AUCHNAGATT	ABERDEENSHIRE	BARLEY	L-SAND	351.33	Days
Days to Ripening	2016	COSTELLO	ST-BOSW	SCOTTISH BORDERS	POTATO	L-SAND	339.67	Days
Days to Ripening	2016	COSTELLO	BALGONIE	FIFE	OAT	L-SAND	336	Days
Days to Ripening	2016	COSTELLO	ALKERTON	OXFORDSHIRE	BEANS	MEDIUM	301	Days
Days to Ripening	2016	COSTELLO	CAWOOD	NORTH YORKSHIRE	BEANS	MEDIUM	312	Days
Days to Ripening	2016	COSTELLO	ULCEBY	NORTH LINCOLNSHIRE	OILSEED RAPE	D-CLAY	316.33	Days
Days to Ripening	2016	COSTELLO	BRECHIN	ANGUS	OILSEED RAPE	MEDIUM	341	Days
Days to Ripening	2016	COSTELLO	PETHAM	KENT	BEANS	MEDIUM	304.33	Days
Days to Ripening	2016	COSTELLO	ELMSWELL	SUFFOLK	OILSEED RAPE	MEDIUM	321	Days
Days to Ripening	2016	COSTELLO	WELBOURN	LINCOLNSHIRE	OILSEED RAPE	SHALLOW	320	Days
Days to Ripening	2016	COSTELLO	BAINTON	EAST RIDING OF YORKSHIRE	OILSEED RAPE	MEDIUM	315	Days
Days to Ripening	2016	COSTELLO	PINCHBECK	LINCOLNSHIRE	POTATO	D-SILT	296	Days
Days to Ripening	2016	COSTELLO	HUMBIE	EAST LOTHIAN	OILSEED RAPE	MEDIUM	345.33	Days
Days to Ripening	2016	COSTELLO	TIBTHORPE	EAST RIDING OF YORKSHIRE	OILSEED RAPE	MEDIUM	323.67	Days
Days to Ripening	2016	COSTELLO	HLEGH	CHESHIRE EAST	WHEAT	MEDIUM	304.33	Days
Days to Ripening	2016	COSTELLO	FRISBYONTHEWREAKE	LEICESTERSHIRE	OILSEED RAPE	D-CLAY	311.33	Days
Days to Ripening	2017	COSTELLO	THAXTED	ESSEX	OILSEED RAPE	D-CLAY	276	Days
Days to Ripening	2017	COSTELLO	CALLOW	HEREFORDSHIRE	COUNTY OF	OILSEED RAPE	315	Days
Days to Ripening	2017	COSTELLO	COWBRIDGE	VALE OF GLAMORGAN	OILSEED RAPE	MEDIUM	302.67	Days
Days to Ripening	2017	COSTELLO	FRIDAYTHORPE	NORTH YORKSHIRE	PEAS	SHALLOW	319	Days
Days to Ripening	2017	COSTELLO	EASTMLLNG	KENT	OAT	MEDIUM	271	Days
Days to Ripening	2017	COSTELLO	DEOPHAM	NORFOLK	PEAS	MEDIUM	305.67	Days
Days to Ripening	2017	COSTELLO	LIMAVADY	CAUSEWAY COAST AND GLENS	OILSEED RAPE	MEDIUM	303	Days
Days to Ripening	2017	COSTELLO	ICKLETON	CAMBRIDGESHIRE	WHEAT	MEDIUM	281	Days
Days to Ripening	2017	COSTELLO	BALGONIE	FIFE	OAT	L-SAND	333.67	Days
Days to Ripening	2017	COSTELLO	KELSO	SCOTTISH BORDERS	POTATO	L-SAND	322.33	Days
Days to Ripening	2017	COSTELLO	ULCEBY	NORTH LINCOLNSHIRE	OILSEED RAPE	D-CLAY	286.33	Days
Days to Ripening	2017	COSTELLO	CROFT-ON-TEES	NORTH YORKSHIRE	OILSEED RAPE	MEDIUM	325.33	Days
Days to Ripening	2017	COSTELLO	BRECHIN	ANGUS	OILSEED RAPE	MEDIUM	340	Days
Days to Ripening	2017	COSTELLO	ELGIN	MORAY	POTATO	L-SAND	312.67	Days
Days to Ripening	2017	COSTELLO	HLEGH	CHESHIRE EAST	WHEAT	MEDIUM	299	Days
Days to Ripening	2017	COSTELLO	WELBOURN	LINCOLNSHIRE	OILSEED RAPE	SHALLOW	316	Days
Days to Ripening	2017	COSTELLO	BURDON	SUNDERLAND	OILSEED RAPE	MEDIUM	325	Days
Days to Ripening	2017	COSTELLO	SPALDING	LINCOLNSHIRE	PEAS	D-SILT	294.67	Days
Days to Ripening	2017	COSTELLO	SALTOUN	EAST LOTHIAN	OILSEED RAPE	MEDIUM	343.33	Days
Days to Ripening	2017	COSTELLO	FRSTHRP	LINCOLNSHIRE	OILSEED RAPE	D-CLAY	298	Days
Days to Ripening	2017	COSTELLO	NORTHDALTON	EAST RIDING OF YORKSHIRE	OILSEED RAPE	MEDIUM	325.33	Days
Days to Ripening	2017	COSTELLO	EDGMOND	SHROPSHIRE	OILSEED RAPE	MEDIUM	295	Days
Days to Ripening	2012	COUGAR	CROFT-ON-TEES	NORTH YORKSHIRE	-	-	335	Days
Days to Ripening	2012	COUGAR	ELLON	ABERDEENSHIRE	-	-	345	Days
Days to Ripening	2012	COUGAR	ST-BOSW	SCOTTISH BORDERS	-	-	342.33	Days
Days to Ripening	2012	COUGAR	BALGONIE	FIFE	-	-	346.33	Days
Days to Ripening	2012	COUGAR	STCHWRTH	CAMBRIDGESHIRE	-	-	298.67	Days
Days to Ripening	2012	COUGAR	ULCEBY	NORTH LINCOLNSHIRE	-	-	320.33	Days
Days to Ripening	2012	COUGAR	LUTHERMR	ABERDEENSHIRE	-	-	337.33	Days
Days to Ripening	2012	COUGAR	PETHAM	KENT	-	-	310.33	Days
Days to Ripening	2012	COUGAR	WELBOURN	LINCOLNSHIRE	-	-	331	Days
Days to Ripening	2012	COUGAR	HUMBIE	EAST LOTHIAN	-	-	348.67	Days
Days to Ripening	2012	COUGAR	HINSTOCK	SHROPSHIRE	-	-	321	Days
Days to Ripening	2012	COUGAR	LYMM	CHESHIRE EAST	-	-	316.33	Days
Days to Ripening	2012	COUGAR	BARTHORPE	NORTH YORKSHIRE	-	-	329	Days
Days to Ripening	2012	COUGAR	FRAMLINGHAM	SUFFOLK	-	-	322	Days
Days to Ripening	2012	COUGAR	ATTLEBRO	NORFOLK	-	-	281.33	Days
Days to Ripening	2012	COUGAR	ICKLETON	CAMBRIDGESHIRE	-	-	303	Days
Days to Ripening	2013	COUGAR	STOWMARKET	SUFFOLK	WHEAT	D-CLAY	302	Days
Days to Ripening	2013	COUGAR	ULCEBY	NORTH LINCOLNSHIRE	OILSEED RAPE	D-CLAY	321	Days
Days to Ripening	2013	COUGAR	LUTHERMR	ABERDEENSHIRE	WHEAT	MEDIUM	292.33	Days
Days to Ripening	2013	COUGAR	WELBOURN	LINCOLNSHIRE	BARLEY	SHALLOW	322.67	Days
Days to Ripening	2013	COUGAR	MOULTON	LINCOLNSHIRE	PEAS	D-SILT	302	Days
Days to Ripening	2013	COUGAR	EDGMOND	SHROPSHIRE	OAT	L-SAND	303.5	Days
Days to Ripening	2013	COUGAR	ICKLETON	CAMBRIDGESHIRE	WHEAT	MEDIUM	276	Days
Days to Ripening	2013	COUGAR	ELLON	ABERDEENSHIRE	BARLEY	L-SAND	328	Days
Days to Ripening	2013	COUGAR	ST-BOSW	SCOTTISH BORDERS	POTATO	L-SAND	322	Days
Days to Ripening	2013	COUGAR	BALGONIE	FIFE	OAT	L-SAND	322	Days
Days to Ripening	2013	COUGAR	ALKERTON	OXFORDSHIRE	BARLEY	L-SAND	323	Days
Days to Ripening	2014	COUGAR	CROFT-ON-TEES	NORTH YORKSHIRE	BEANS	MEDIUM	316.67	Days
Days to Ripening	2014	COUGAR	MORLEYSTBOTOLPH	NORFOLK	OILSEED RAPE	MEDIUM	296	Days
Days to Ripening	2014	COUGAR	ICKLETON	CAMBRIDGESHIRE	WHEAT	MEDIUM	292	Days
Days to Ripening	2014	COUGAR	AUCHNAGATT	ABERDEENSHIRE	WHEAT	L-SAND	340.67	Days
Days to Ripening	2014	COUGAR	ST-BOSW	SCOTTISH BORDERS	POTATO	L-SAND	324.33	Days
Days to Ripening	2014	COUGAR	BALGONIE	FIFE	OILSEED RAPE	L-SAND	333.33	Days
Days to Ripening	2014	COUGAR	ALKERTON	OXFORDSHIRE	BEANS	L-SAND	311.67	Days
Days to Ripening	2014	COUGAR	ULCEBY	NORTH LINCOLNSHIRE	OILSEED RAPE	D-CLAY	314	Days
Days to Ripening	2014	COUGAR	LUTHERMR	ABERDEENSHIRE	POTATO	MEDIUM	313.33	Days
Days to Ripening	2014	COUGAR	PETHAM	KENT	OAT	MEDIUM	287	Days
Days to Ripening	2014	COUGAR	WELBOURN	LINCOLNSHIRE	BARLEY	SHALLOW	302.67	Days
Days to Ripening	2014	COUGAR	MOULTON	LINCOLNSHIRE	VEGETABLES	D-SILT	303	Days
Days to Ripening	2014	COUGAR	HLEGH	CHESHIRE EAST	WHEAT	MEDIUM	310	Days
Days to Ripening	2014	COUGAR	EDGMOND	SHROPSHIRE	GRASS	MEDIUM	307.67	Days
Days to Ripening	2014	COUGAR	BARTHORPE	NORTH YORKSHIRE	OILSEED RAPE	D-CLAY	311.67	Days
Days to Ripening	2014	COUGAR	SANCTON	EAST RIDING OF YORKSHIRE	OILSEED RAPE	MEDIUM	305.67	Days
Days to Ripening	2014	COUGAR	BEDFIELD	SUFFOLK	OILSEED RAPE	D-CLAY	300	Days
Days to Ripening	2014	COUGAR	FRISBYONTHEWREAKE	LEICESTERSHIRE	OILSEED RAPE	D-CLAY	299.67	Days
Days to Ripening	2015	COUGAR	BARNSTON	ESSEX	WHEAT	D-CLAY	290	Days
Days to Ripening	2015	COUGAR	LIMAVADY	CAUSEWAY COAST AND GLENS	OILSEED RAPE	MEDIUM	332	Days
Days to Ripening	2015	COUGAR	ICKLETON	CAMBRIDGESHIRE	WHEAT	MEDIUM	301	Days
Days to Ripening	2015	COUGAR	ST-BOSW	SCOTTISH BORDERS	OILSEED RAPE	L-SAND	341	Days
Days to Ripening	2015	COUGAR	BALGONIE	FIFE	OILSEED RAPE	L-SAND	346.33	Days
Days to Ripening	2015	COUGAR	ALKERTON	OXFORDSHIRE	BEANS	L-SAND	311	Days
Days to Ripening	2015	COUGAR	CAWOOD	NORTH YORKSHIRE	BEANS	MEDIUM	318	Days
Days to Ripening	2015	COUGAR	ULCEBY	NORTH LINCOLNSHIRE	OILSEED RAPE	D-CLAY	324.67	Days
Days to Ripening	2015	COUGAR	LUTHERMR	ABERDEENSHIRE	POTATO	MEDIUM	342.33	Days
Days to Ripening	2015	COUGAR	WYE	KENT	BEANS	MEDIUM	283	Days
Days to Ripening	2015	COUGAR	CROFT-ON-TEES	NORTH YORKSHIRE	BEANS	MEDIUM	335.67	Days
Days to Ripening	2015	COUGAR	ELMSWELL	SUFFOLK	OILSEED RAPE	MEDIUM	334	Days
Days to Ripening	2015	COUGAR	WELBOURN	LINCOLNSHIRE	BARLEY	SHALLOW	322	Days
Days to Ripening	2015	COUGAR	HUMBIE	EAST LOTHIAN	OILSEED RAPE	MEDIUM	350.67	Days
Days to Ripening	2015	COUGAR	HLEGH	CHESHIRE EAST	WHEAT	MEDIUM	319	Days
Days to Ripening	2015	COUGAR	BEDFIELD	SUFFOLK	BEANS	D-CLAY	310.33	Days
Days to Ripening	2015	COUGAR	FRISBYONTHEWREAKE	LEICESTERSHIRE	OILSEED RAPE	D-CLAY	307	Days
Days to Ripening	2015	COUGAR	MORLEYSTBOTOLPH	NORFOLK	OILSEED RAPE	MEDIUM	306.67	Days
Days to Ripening	2012	CRUSOE	CROFT-ON-TEES	NORTH YORKSHIRE	-	-	332.33	Days
Days to Ripening	2012	CRUSOE	ELLON	ABERDEENSHIRE	-	-	343	Days
Days to Ripening	2012	CRUSOE	ST-BOSW	SCOTTISH BORDERS	-	-	343	Days
Days to Ripening	2012	CRUSOE	BALGONIE	FIFE	-	-	345.67	Days
Days to Ripening	2012	CRUSOE	STCHWRTH	CAMBRIDGESHIRE	-	-	298	Days
Days to Ripening	2012	CRUSOE	ULCEBY	NORTH LINCOLNSHIRE	-	-	323	Days
Days to Ripening	2012	CRUSOE	LUTHERMR	ABERDEENSHIRE	-	-	338.67	Days
Days to Ripening	2012	CRUSOE	PETHAM	KENT	-	-	309.67	Days
Days to Ripening	2012	CRUSOE	WELBOURN	LINCOLNSHIRE	-	-	329.67	Days
Days to Ripening	2012	CRUSOE	HUMBIE	EAST LOTHIAN	-	-	348.67	Days
Days to Ripening	2012	CRUSOE	HINSTOCK	SHROPSHIRE	-	-	323	Days
Days to Ripening	2012	CRUSOE	LYMM	CHESHIRE EAST	-	-	311.33	Days
Days to Ripening	2012	CRUSOE	BARTHORPE	NORTH YORKSHIRE	-	-	326.67	Days
Days to Ripening	2012	CRUSOE	FRAMLINGHAM	SUFFOLK	-	-	318.67	Days
Days to Ripening	2012	CRUSOE	ATTLEBRO	NORFOLK	-	-	282.67	Days
Days to Ripening	2012	CRUSOE	ICKLETON	CAMBRIDGESHIRE	-	-	305	Days
Days to Ripening	2013	CRUSOE	STOWMARKET	SUFFOLK	WHEAT	D-CLAY	297.67	Days
Days to Ripening	2013	CRUSOE	ULCEBY	NORTH LINCOLNSHIRE	OILSEED RAPE	D-CLAY	319	Days
Days to Ripening	2013	CRUSOE	LUTHERMR	ABERDEENSHIRE	WHEAT	MEDIUM	288.33	Days
Days to Ripening	2013	CRUSOE	WELBOURN	LINCOLNSHIRE	BARLEY	SHALLOW	320	Days
Days to Ripening	2013	CRUSOE	MOULTON	LINCOLNSHIRE	PEAS	D-SILT	302.67	Days
Days to Ripening	2013	CRUSOE	EDGMOND	SHROPSHIRE	OAT	L-SAND	301.33	Days
Days to Ripening	2013	CRUSOE	ICKLETON	CAMBRIDGESHIRE	WHEAT	MEDIUM	273	Days
Days to Ripening	2013	CRUSOE	ELLON	ABERDEENSHIRE	BARLEY	L-SAND	328	Days
Days to Ripening	2013	CRUSOE	ST-BOSW	SCOTTISH BORDERS	POTATO	L-SAND	319.33	Days
Days to Ripening	2013	CRUSOE	BALGONIE	FIFE	OAT	L-SAND	318.33	Days
Days to Ripening	2013	CRUSOE	ALKERTON	OXFORDSHIRE	BARLEY	L-SAND	323	Days
Days to Ripening	2014	CRUSOE	CROFT-ON-TEES	NORTH YORKSHIRE	BEANS	MEDIUM	317.33	Days
Days to Ripening	2014	CRUSOE	MORLEYSTBOTOLPH	NORFOLK	OILSEED RAPE	MEDIUM	295.33	Days
Days to Ripening	2014	CRUSOE	ICKLETON	CAMBRIDGESHIRE	WHEAT	MEDIUM	291	Days
Days to Ripening	2014	CRUSOE	AUCHNAGATT	ABERDEENSHIRE	WHEAT	L-SAND	338	Days
Days to Ripening	2014	CRUSOE	ST-BOSW	SCOTTISH BORDERS	POTATO	L-SAND	321	Days
Days to Ripening	2014	CRUSOE	BALGONIE	FIFE	OILSEED RAPE	L-SAND	329.33	Days
Days to Ripening	2014	CRUSOE	ALKERTON	OXFORDSHIRE	BEANS	L-SAND	312.33	Days
Days to Ripening	2014	CRUSOE	ULCEBY	NORTH LINCOLNSHIRE	OILSEED RAPE	D-CLAY	314.67	Days
Days to Ripening	2014	CRUSOE	LUTHERMR	ABERDEENSHIRE	POTATO	MEDIUM	308.67	Days
Days to Ripening	2014	CRUSOE	PETHAM	KENT	OAT	MEDIUM	286.33	Days
Days to Ripening	2014	CRUSOE	WELBOURN	LINCOLNSHIRE	BARLEY	SHALLOW	304.33	Days
Days to Ripening	2014	CRUSOE	MOULTON	LINCOLNSHIRE	VEGETABLES	D-SILT	302	Days
Days to Ripening	2014	CRUSOE	HLEGH	CHESHIRE EAST	WHEAT	MEDIUM	308	Days
Days to Ripening	2014	CRUSOE	EDGMOND	SHROPSHIRE	GRASS	MEDIUM	305	Days
Days to Ripening	2014	CRUSOE	BARTHORPE	NORTH YORKSHIRE	OILSEED RAPE	D-CLAY	307	Days
Days to Ripening	2014	CRUSOE	SANCTON	EAST RIDING OF YORKSHIRE	OILSEED RAPE	MEDIUM	303.67	Days
Days to Ripening	2014	CRUSOE	BEDFIELD	SUFFOLK	OILSEED RAPE	D-CLAY	300.67	Days
Days to Ripening	2014	CRUSOE	FRISBYONTHEWREAKE	LEICESTERSHIRE	OILSEED RAPE	D-CLAY	293.33	Days
Days to Ripening	2015	CRUSOE	BARNSTON	ESSEX	WHEAT	D-CLAY	286	Days
Days to Ripening	2015	CRUSOE	LIMAVADY	CAUSEWAY COAST AND GLENS	OILSEED RAPE	MEDIUM	332	Days
Days to Ripening	2015	CRUSOE	ICKLETON	CAMBRIDGESHIRE	WHEAT	MEDIUM	296.33	Days
Days to Ripening	2015	CRUSOE	AUCHNAGATT	ABERDEENSHIRE	BARLEY	L-SAND	360	Days
Days to Ripening	2015	CRUSOE	ST-BOSW	SCOTTISH BORDERS	OILSEED RAPE	L-SAND	340.33	Days
Days to Ripening	2015	CRUSOE	BALGONIE	FIFE	OILSEED RAPE	L-SAND	345	Days
Days to Ripening	2015	CRUSOE	ALKERTON	OXFORDSHIRE	BEANS	L-SAND	311	Days
Days to Ripening	2015	CRUSOE	CAWOOD	NORTH YORKSHIRE	BEANS	MEDIUM	316	Days
Days to Ripening	2015	CRUSOE	ULCEBY	NORTH LINCOLNSHIRE	OILSEED RAPE	D-CLAY	324.67	Days
Days to Ripening	2015	CRUSOE	LUTHERMR	ABERDEENSHIRE	POTATO	MEDIUM	339.67	Days
Days to Ripening	2015	CRUSOE	WYE	KENT	BEANS	MEDIUM	279.67	Days
Days to Ripening	2015	CRUSOE	CROFT-ON-TEES	NORTH YORKSHIRE	BEANS	MEDIUM	332.33	Days
Days to Ripening	2015	CRUSOE	ELMSWELL	SUFFOLK	OILSEED RAPE	MEDIUM	332.67	Days
Days to Ripening	2015	CRUSOE	WELBOURN	LINCOLNSHIRE	BARLEY	SHALLOW	321.33	Days
Days to Ripening	2015	CRUSOE	HUMBIE	EAST LOTHIAN	OILSEED RAPE	MEDIUM	350.33	Days
Days to Ripening	2015	CRUSOE	HLEGH	CHESHIRE EAST	WHEAT	MEDIUM	318.33	Days
Days to Ripening	2015	CRUSOE	BEDFIELD	SUFFOLK	BEANS	D-CLAY	311.33	Days
Days to Ripening	2015	CRUSOE	FRISBYONTHEWREAKE	LEICESTERSHIRE	OILSEED RAPE	D-CLAY	305	Days
Days to Ripening	2015	CRUSOE	MORLEYSTBOTOLPH	NORFOLK	OILSEED RAPE	MEDIUM	304	Days
Days to Ripening	2016	CRUSOE	THAXTED	ESSEX	OILSEED RAPE	D-CLAY	291	Days
Days to Ripening	2016	CRUSOE	LIMAVADY	CAUSEWAY COAST AND GLENS	POTATO	D-SILT	309	Days
Days to Ripening	2016	CRUSOE	ICKLETON	CAMBRIDGESHIRE	WHEAT	MEDIUM	298	Days
Days to Ripening	2016	CRUSOE	AUCHNAGATT	ABERDEENSHIRE	BARLEY	L-SAND	349.33	Days
Days to Ripening	2016	CRUSOE	ST-BOSW	SCOTTISH BORDERS	POTATO	L-SAND	341	Days
Days to Ripening	2016	CRUSOE	BALGONIE	FIFE	OAT	L-SAND	334	Days
Days to Ripening	2016	CRUSOE	ALKERTON	OXFORDSHIRE	BEANS	MEDIUM	301	Days
Days to Ripening	2016	CRUSOE	CAWOOD	NORTH YORKSHIRE	BEANS	MEDIUM	310	Days
Days to Ripening	2016	CRUSOE	ULCEBY	NORTH LINCOLNSHIRE	OILSEED RAPE	D-CLAY	316.67	Days
Days to Ripening	2016	CRUSOE	BRECHIN	ANGUS	OILSEED RAPE	MEDIUM	344.33	Days
Days to Ripening	2016	CRUSOE	PETHAM	KENT	BEANS	MEDIUM	302.33	Days
Days to Ripening	2016	CRUSOE	ELMSWELL	SUFFOLK	OILSEED RAPE	MEDIUM	319.67	Days
Days to Ripening	2016	CRUSOE	WELBOURN	LINCOLNSHIRE	OILSEED RAPE	SHALLOW	320	Days
Days to Ripening	2016	CRUSOE	BAINTON	EAST RIDING OF YORKSHIRE	OILSEED RAPE	MEDIUM	312	Days
Days to Ripening	2016	CRUSOE	PINCHBECK	LINCOLNSHIRE	POTATO	D-SILT	296	Days
Days to Ripening	2016	CRUSOE	HUMBIE	EAST LOTHIAN	OILSEED RAPE	MEDIUM	343.67	Days
Days to Ripening	2016	CRUSOE	TIBTHORPE	EAST RIDING OF YORKSHIRE	OILSEED RAPE	MEDIUM	321.67	Days
Days to Ripening	2016	CRUSOE	HLEGH	CHESHIRE EAST	WHEAT	MEDIUM	303.67	Days
Days to Ripening	2016	CRUSOE	FRISBYONTHEWREAKE	LEICESTERSHIRE	OILSEED RAPE	D-CLAY	310.33	Days
Days to Ripening	2017	CRUSOE	THAXTED	ESSEX	OILSEED RAPE	D-CLAY	272.67	Days
Days to Ripening	2017	CRUSOE	CALLOW	HEREFORDSHIRE	COUNTY OF	OILSEED RAPE	315	Days
Days to Ripening	2017	CRUSOE	COWBRIDGE	VALE OF GLAMORGAN	OILSEED RAPE	MEDIUM	300.67	Days
Days to Ripening	2017	CRUSOE	FRIDAYTHORPE	NORTH YORKSHIRE	PEAS	SHALLOW	318.67	Days
Days to Ripening	2017	CRUSOE	EASTMLLNG	KENT	OAT	MEDIUM	269.67	Days
Days to Ripening	2017	CRUSOE	DEOPHAM	NORFOLK	PEAS	MEDIUM	305	Days
Days to Ripening	2017	CRUSOE	LIMAVADY	CAUSEWAY COAST AND GLENS	OILSEED RAPE	MEDIUM	299	Days
Days to Ripening	2017	CRUSOE	ICKLETON	CAMBRIDGESHIRE	WHEAT	MEDIUM	280	Days
Days to Ripening	2017	CRUSOE	BALGONIE	FIFE	OAT	L-SAND	333.67	Days
Days to Ripening	2017	CRUSOE	KELSO	SCOTTISH BORDERS	POTATO	L-SAND	323	Days
Days to Ripening	2017	CRUSOE	ULCEBY	NORTH LINCOLNSHIRE	OILSEED RAPE	D-CLAY	285.67	Days
Days to Ripening	2017	CRUSOE	CROFT-ON-TEES	NORTH YORKSHIRE	OILSEED RAPE	MEDIUM	325.67	Days
Days to Ripening	2017	CRUSOE	BRECHIN	ANGUS	OILSEED RAPE	MEDIUM	338.67	Days
Days to Ripening	2017	CRUSOE	ELGIN	MORAY	POTATO	L-SAND	312.67	Days
Days to Ripening	2017	CRUSOE	HLEGH	CHESHIRE EAST	WHEAT	MEDIUM	299	Days
Days to Ripening	2017	CRUSOE	WELBOURN	LINCOLNSHIRE	OILSEED RAPE	SHALLOW	314	Days
Days to Ripening	2017	CRUSOE	BURDON	SUNDERLAND	OILSEED RAPE	MEDIUM	323	Days
Days to Ripening	2017	CRUSOE	SPALDING	LINCOLNSHIRE	PEAS	D-SILT	292	Days
Days to Ripening	2017	CRUSOE	SALTOUN	EAST LOTHIAN	OILSEED RAPE	MEDIUM	345	Days
Days to Ripening	2017	CRUSOE	FRSTHRP	LINCOLNSHIRE	OILSEED RAPE	D-CLAY	298	Days
Days to Ripening	2017	CRUSOE	NORTHDALTON	EAST RIDING OF YORKSHIRE	OILSEED RAPE	MEDIUM	319.33	Days
Days to Ripening	2017	CRUSOE	EDGMOND	SHROPSHIRE	OILSEED RAPE	MEDIUM	294.33	Days
Days to Ripening	2013	CUBANITA	STOWMARKET	SUFFOLK	WHEAT	D-CLAY	299	Days
Days to Ripening	2013	CUBANITA	ULCEBY	NORTH LINCOLNSHIRE	OILSEED RAPE	D-CLAY	316	Days
Days to Ripening	2013	CUBANITA	LUTHERMR	ABERDEENSHIRE	WHEAT	MEDIUM	289.67	Days
Days to Ripening	2013	CUBANITA	WELBOURN	LINCOLNSHIRE	BARLEY	SHALLOW	316.67	Days
Days to Ripening	2013	CUBANITA	MOULTON	LINCOLNSHIRE	PEAS	D-SILT	301.33	Days
Days to Ripening	2013	CUBANITA	EDGMOND	SHROPSHIRE	OAT	L-SAND	302.33	Days
Days to Ripening	2013	CUBANITA	ICKLETON	CAMBRIDGESHIRE	WHEAT	MEDIUM	273	Days
Days to Ripening	2013	CUBANITA	ELLON	ABERDEENSHIRE	BARLEY	L-SAND	327.33	Days
Days to Ripening	2013	CUBANITA	ST-BOSW	SCOTTISH BORDERS	POTATO	L-SAND	318.67	Days
Days to Ripening	2013	CUBANITA	BALGONIE	FIFE	OAT	L-SAND	317.67	Days
Days to Ripening	2013	CUBANITA	ALKERTON	OXFORDSHIRE	BARLEY	L-SAND	323	Days
Days to Ripening	2014	CUBANITA	CROFT-ON-TEES	NORTH YORKSHIRE	BEANS	MEDIUM	318	Days
Days to Ripening	2014	CUBANITA	MORLEYSTBOTOLPH	NORFOLK	OILSEED RAPE	MEDIUM	296	Days
Days to Ripening	2014	CUBANITA	ICKLETON	CAMBRIDGESHIRE	WHEAT	MEDIUM	291	Days
Days to Ripening	2014	CUBANITA	AUCHNAGATT	ABERDEENSHIRE	WHEAT	L-SAND	338	Days
Days to Ripening	2014	CUBANITA	ST-BOSW	SCOTTISH BORDERS	POTATO	L-SAND	320.33	Days
Days to Ripening	2014	CUBANITA	BALGONIE	FIFE	OILSEED RAPE	L-SAND	328.67	Days
Days to Ripening	2014	CUBANITA	ALKERTON	OXFORDSHIRE	BEANS	L-SAND	311	Days
Days to Ripening	2014	CUBANITA	ULCEBY	NORTH LINCOLNSHIRE	OILSEED RAPE	D-CLAY	311.33	Days
Days to Ripening	2014	CUBANITA	LUTHERMR	ABERDEENSHIRE	POTATO	MEDIUM	308.67	Days
Days to Ripening	2014	CUBANITA	PETHAM	KENT	OAT	MEDIUM	286.33	Days
Days to Ripening	2014	CUBANITA	WELBOURN	LINCOLNSHIRE	BARLEY	SHALLOW	304	Days
Days to Ripening	2014	CUBANITA	MOULTON	LINCOLNSHIRE	VEGETABLES	D-SILT	300	Days
Days to Ripening	2014	CUBANITA	HLEGH	CHESHIRE EAST	WHEAT	MEDIUM	308	Days
Days to Ripening	2014	CUBANITA	EDGMOND	SHROPSHIRE	GRASS	MEDIUM	306.33	Days
Days to Ripening	2014	CUBANITA	BARTHORPE	NORTH YORKSHIRE	OILSEED RAPE	D-CLAY	307	Days
Days to Ripening	2014	CUBANITA	SANCTON	EAST RIDING OF YORKSHIRE	OILSEED RAPE	MEDIUM	303.67	Days
Days to Ripening	2014	CUBANITA	BEDFIELD	SUFFOLK	OILSEED RAPE	D-CLAY	298	Days
Days to Ripening	2014	CUBANITA	FRISBYONTHEWREAKE	LEICESTERSHIRE	OILSEED RAPE	D-CLAY	295.33	Days
Days to Ripening	2015	CUBANITA	BARNSTON	ESSEX	WHEAT	D-CLAY	287.67	Days
Days to Ripening	2015	CUBANITA	LIMAVADY	CAUSEWAY COAST AND GLENS	OILSEED RAPE	MEDIUM	330	Days
Days to Ripening	2015	CUBANITA	ICKLETON	CAMBRIDGESHIRE	WHEAT	MEDIUM	299	Days
Days to Ripening	2015	CUBANITA	AUCHNAGATT	ABERDEENSHIRE	BARLEY	L-SAND	360	Days
Days to Ripening	2015	CUBANITA	ST-BOSW	SCOTTISH BORDERS	OILSEED RAPE	L-SAND	339	Days
Days to Ripening	2015	CUBANITA	BALGONIE	FIFE	OILSEED RAPE	L-SAND	344.33	Days
Days to Ripening	2015	CUBANITA	ALKERTON	OXFORDSHIRE	BEANS	L-SAND	310	Days
Days to Ripening	2015	CUBANITA	CAWOOD	NORTH YORKSHIRE	BEANS	MEDIUM	320	Days
Days to Ripening	2015	CUBANITA	ULCEBY	NORTH LINCOLNSHIRE	OILSEED RAPE	D-CLAY	325.33	Days
Days to Ripening	2015	CUBANITA	LUTHERMR	ABERDEENSHIRE	POTATO	MEDIUM	337.67	Days
Days to Ripening	2015	CUBANITA	WYE	KENT	BEANS	MEDIUM	280.33	Days
Days to Ripening	2015	CUBANITA	CROFT-ON-TEES	NORTH YORKSHIRE	BEANS	MEDIUM	331	Days
Days to Ripening	2015	CUBANITA	ELMSWELL	SUFFOLK	OILSEED RAPE	MEDIUM	333.33	Days
Days to Ripening	2015	CUBANITA	WELBOURN	LINCOLNSHIRE	BARLEY	SHALLOW	321.33	Days
Days to Ripening	2015	CUBANITA	HUMBIE	EAST LOTHIAN	OILSEED RAPE	MEDIUM	350	Days
Days to Ripening	2015	CUBANITA	HLEGH	CHESHIRE EAST	WHEAT	MEDIUM	319	Days
Days to Ripening	2015	CUBANITA	BEDFIELD	SUFFOLK	BEANS	D-CLAY	309.67	Days
Days to Ripening	2015	CUBANITA	FRISBYONTHEWREAKE	LEICESTERSHIRE	OILSEED RAPE	D-CLAY	307.33	Days
Days to Ripening	2015	CUBANITA	MORLEYSTBOTOLPH	NORFOLK	OILSEED RAPE	MEDIUM	304	Days
Days to Ripening	2003	DART	ABERDEEN	ABERDEENSHIRE	GRASS	SANDY CLAY LOAM	327.7	Days
Days to Ripening	2003	DART	WORKSOP	NOTTINGHAMSHIRE	VEGETABLES	LIGHT SAND	309	Days
Days to Ripening	2003	DART	WATERBEACH	CAMBRIDGESHIRE	PEAS	PEATY SOIL	280.7	Days
Days to Ripening	2003	DART	FAKENHAM	NORFOLK	BEET	LIGHT SAND	283.3	Days
Days to Ripening	2003	DART	ELGIN	MORAY	BARLEY	SANDY CLAY	324	Days
Days to Ripening	2003	DART	WYMONDHAM	NORFOLK	WHEAT	MEDIUM	301	Days
Days to Ripening	2003	DART	SPALDING	LINCOLNSHIRE	PEAS	DEEP FERTILE SILTY	280	Days
Days to Ripening	2003	DART	CANTERBURY	KENT	OILSEED RAPE	DEEP FERTILE SILTY	311.3	Days
Days to Ripening	2003	DART	MEMOW	LEICESTERSHIRE	OILSEED RAPE	DEEP CLAY	279.3	Days
Days to Ripening	2003	DART	WINCHESTER	HAMPSHIRE	POPPY	MEDIUM	302	Days
Days to Ripening	2003	DART	KINGSTON	DEVON	OAT	CLAY LOAM	303.3	Days
Days to Ripening	2003	DART	LOCKERBIE	DUMFRIES AND GALLOWAY	BARLEY	LIGHT SAND	319	Days
Days to Ripening	2003	DART	LIMAVADY	CAUSEWAY COAST AND GLENS	WHEAT	DEEP CLAY	316	Days
Days to Ripening	2003	DART	HADDINGTON	EAST LOTHIAN	WHEAT	MEDIUM	313.7	Days
Days to Ripening	2003	DART	DUNS	SCOTTISH BORDERS	OILSEED RAPE	DEEP CLAY	324	Days
Days to Ripening	2003	DART	CROFT-ON-TEES	NORTH YORKSHIRE	POTATO	DEEP CLAY	317.7	Days
Days to Ripening	2003	DART	TADCASTER	NORTH YORKSHIRE	POTATO	SHALLOW	306	Days
Days to Ripening	2004	DART	LAURENCEKIRK	ABERDEENSHIRE	OILSEED RAPE	MEDIUM	346.3	Days
Days to Ripening	2004	DART	GIRTON	CAMBRIDGESHIRE	BEANS	DEEP CLAY	303.3	Days
Days to Ripening	2004	DART	COATES	GLOUCESTERSHIRE	WHEAT	SHALLOW	303.7	Days
Days to Ripening	2004	DART	WARWICK	WARWICKSHIRE	WHEAT	DEEP CLAY	306	Days
Days to Ripening	2004	DART	UPSOMBORNE	HAMPSHIRE	PEAS	MEDIUM	315	Days
Days to Ripening	2004	DART	LIMAVADY	CAUSEWAY COAST AND GLENS	WHEAT	DEEP CLAY	327	Days
Days to Ripening	2004	DART	HUMBIE	EAST LOTHIAN	WHEAT	MEDIUM	332.3	Days
Days to Ripening	2002	DEBEN	WORKSOP	NOTTINGHAMSHIRE	-	-	300	Days
Days to Ripening	2002	DEBEN	SLEAFORD	LINCOLNSHIRE	-	-	293	Days
Days to Ripening	2002	DEBEN	FAKENHAM	NORFOLK	-	-	290	Days
Days to Ripening	2002	DEBEN	KINGSLYNN	NORFOLK	-	-	297	Days
Days to Ripening	2002	DEBEN	KETTG	NORTHAMPTONSHIRE	-	-	307	Days
Days to Ripening	2002	DEBEN	OLDM	ABERDEENSHIRE	-	-	348	Days
Days to Ripening	2002	DEBEN	WYMONDHAM	NORFOLK	-	-	309	Days
Days to Ripening	2002	DEBEN	SPALDING	LINCOLNSHIRE	-	-	286	Days
Days to Ripening	2002	DEBEN	OTLEY	SUFFOLK	-	-	302	Days
Days to Ripening	2002	DEBEN	ASHFD	KENT	-	-	312	Days
Days to Ripening	2002	DEBEN	TELFORD	SHROPSHIRE	-	-	314	Days
Days to Ripening	2002	DEBEN	WARMR	WILTSHIRE	-	-	316	Days
Days to Ripening	2002	DEBEN	COUPAR	PERTH AND KINROSS	-	-	326	Days
Days to Ripening	2002	DEBEN	WINCHESTER	HAMPSHIRE	-	-	311	Days
Days to Ripening	2002	DEBEN	WIMBOURNESTGILES	DORSET	-	-	293	Days
Days to Ripening	2002	DEBEN	ANNAN	DUMFRIES AND GALLOWAY	-	-	317	Days
Days to Ripening	2002	DEBEN	LIMAVADY	CAUSEWAY COAST AND GLENS	-	-	314	Days
Days to Ripening	2002	DEBEN	EDINB	CITY OF EDINBURGH	-	-	329	Days
Days to Ripening	2002	DEBEN	COLDSM	SCOTTISH BORDERS	-	-	321	Days
Days to Ripening	2002	DEBEN	CROFT-ON-TEES	NORTH YORKSHIRE	-	-	319	Days
Days to Ripening	2002	DEBEN	TADCASTER	NORTH YORKSHIRE	-	-	301	Days
Days to Ripening	2003	DEBEN	ABERDEEN	ABERDEENSHIRE	GRASS	SANDY CLAY LOAM	325	Days
Days to Ripening	2003	DEBEN	WORKSOP	NOTTINGHAMSHIRE	VEGETABLES	LIGHT SAND	311.7	Days
Days to Ripening	2003	DEBEN	WATERBEACH	CAMBRIDGESHIRE	PEAS	PEATY SOIL	280.3	Days
Days to Ripening	2003	DEBEN	FAKENHAM	NORFOLK	BEET	LIGHT SAND	284	Days
Days to Ripening	2003	DEBEN	ELGIN	MORAY	BARLEY	SANDY CLAY	320	Days
Days to Ripening	2003	DEBEN	WYMONDHAM	NORFOLK	WHEAT	MEDIUM	290	Days
Days to Ripening	2003	DEBEN	SPALDING	LINCOLNSHIRE	PEAS	DEEP FERTILE SILTY	279	Days
Days to Ripening	2003	DEBEN	CANTERBURY	KENT	OILSEED RAPE	DEEP FERTILE SILTY	313	Days
Days to Ripening	2003	DEBEN	MEMOW	LEICESTERSHIRE	OILSEED RAPE	DEEP CLAY	279.3	Days
Days to Ripening	2003	DEBEN	WINCHESTER	HAMPSHIRE	POPPY	MEDIUM	302	Days
Days to Ripening	2003	DEBEN	KINGSTON	DEVON	OAT	CLAY LOAM	303.3	Days
Days to Ripening	2003	DEBEN	LOCKERBIE	DUMFRIES AND GALLOWAY	BARLEY	LIGHT SAND	319	Days
Days to Ripening	2003	DEBEN	LIMAVADY	CAUSEWAY COAST AND GLENS	WHEAT	DEEP CLAY	314	Days
Days to Ripening	2003	DEBEN	HADDINGTON	EAST LOTHIAN	WHEAT	MEDIUM	312.3	Days
Days to Ripening	2003	DEBEN	DUNS	SCOTTISH BORDERS	OILSEED RAPE	DEEP CLAY	323.3	Days
Days to Ripening	2003	DEBEN	CROFT-ON-TEES	NORTH YORKSHIRE	POTATO	DEEP CLAY	315.7	Days
Days to Ripening	2003	DEBEN	TADCASTER	NORTH YORKSHIRE	POTATO	SHALLOW	304	Days
Days to Ripening	2004	DEBEN	LAURENCEKIRK	ABERDEENSHIRE	OILSEED RAPE	MEDIUM	340	Days
Days to Ripening	2004	DEBEN	RAGNALL	NOTTINGHAMSHIRE	OILSEED RAPE	MEDIUM	326.3	Days
Days to Ripening	2004	DEBEN	WATERBEACH	CAMBRIDGESHIRE	BEANS	ORGANIC	287.7	Days
Days to Ripening	2004	DEBEN	WOLFERTON	NORFOLK	BEANS	DEEP CLAY	307	Days
Days to Ripening	2004	DEBEN	GIRTON	CAMBRIDGESHIRE	BEANS	DEEP CLAY	302.3	Days
Days to Ripening	2004	DEBEN	WYE	KENT	OILSEED RAPE	MEDIUM	322.7	Days
Days to Ripening	2004	DEBEN	FRISBYONTHEWREAKE	LEICESTERSHIRE	PEAS	DEEP CLAY	307	Days
Days to Ripening	2004	DEBEN	COATES	GLOUCESTERSHIRE	WHEAT	SHALLOW	300.3	Days
Days to Ripening	2004	DEBEN	WARWICK	WARWICKSHIRE	WHEAT	DEEP CLAY	304.7	Days
Days to Ripening	2004	DEBEN	UPSOMBORNE	HAMPSHIRE	PEAS	MEDIUM	313	Days
Days to Ripening	2004	DEBEN	LIMAVADY	CAUSEWAY COAST AND GLENS	WHEAT	DEEP CLAY	327	Days
Days to Ripening	2004	DEBEN	HUMBIE	EAST LOTHIAN	WHEAT	MEDIUM	330.3	Days
Days to Ripening	2004	DEBEN	BOWSDN	NORTHUMBERLAND	WHEAT	DEEP CLAY	328.5	Days
Days to Ripening	2004	DEBEN	BRAMHAM	LEEDS	OILSEED RAPE	MEDIUM	311	Days
Days to Ripening	2005	DEBEN	RAGNALL	NOTTINGHAMSHIRE	OILSEED RAPE	MEDIUM	314	Days
Days to Ripening	2005	DEBEN	CTHORPE	LINCOLNSHIRE	LINSEED	MEDIUM	271	Days
Days to Ripening	2005	DEBEN	WATERBEACH	CAMBRIDGESHIRE	BEANS	ORGANIC	292.3	Days
Days to Ripening	2005	DEBEN	WOLFERTON	NORFOLK	BEANS	DEEP CLAY	302	Days
Days to Ripening	2005	DEBEN	HISTON	CAMBRIDGESHIRE	BEANS	DEEP CLAY	287.7	Days
Days to Ripening	2005	DEBEN	ELGIN	MORAY	POTATO	MEDIUM	319.3	Days
Days to Ripening	2005	DEBEN	SPALDING	LINCOLNSHIRE	VEGETABLES	DEEP FERTILE SILTY	284	Days
Days to Ripening	2005	DEBEN	FRAMLINGHAM	SUFFOLK	PEAS	DEEP CLAY	282	Days
Days to Ripening	2005	DEBEN	NEWCHURCH	KENT	PEAS	DEEP CLAY	313.7	Days
Days to Ripening	2005	DEBEN	TELFORD	SHROPSHIRE	OILSEED RAPE	MEDIUM	303	Days
Days to Ripening	2005	DEBEN	FRISBYONTHEWREAKE	LEICESTERSHIRE	PEAS	DEEP CLAY	296.7	Days
Days to Ripening	2005	DEBEN	RHYND	PERTH AND KINROSS	WHEAT	MEDIUM	330.3	Days
Days to Ripening	2005	DEBEN	UPSOMBORNE	HAMPSHIRE	GRASS	MEDIUM	305	Days
Days to Ripening	2005	DEBEN	INCEBLUNDELL	SEFTON	OAT	LIGHT SAND	309	Days
Days to Ripening	2005	DEBEN	LOCKERBIE	DUMFRIES AND GALLOWAY	BARLEY	LIGHT SAND	315.7	Days
Days to Ripening	2005	DEBEN	HUMBIE	EAST LOTHIAN	OILSEED RAPE	MEDIUM	335.7	Days
Days to Ripening	2005	DEBEN	WHITSOME	SCOTTISH BORDERS	WHEAT	DEEP CLAY	324.7	Days
Days to Ripening	2005	DEBEN	BOWSDN	NORTHUMBERLAND	WHEAT	DEEP CLAY	330.3	Days
Days to Ripening	2005	DEBEN	BARTHORPE	NORTH YORKSHIRE	OILSEED RAPE	DEEP CLAY	323.7	Days
Days to Ripening	2005	DEBEN	HHALL	LEEDS	OILSEED RAPE	SHALLOW	299.7	Days
Days to Ripening	2006	DEBEN	WOLFERTON	NORFOLK	-	-	290	Days
Days to Ripening	2006	DEBEN	HUMBIE	EAST LOTHIAN	-	-	317.33	Days
Days to Ripening	2006	DEBEN	TELFORD	SHROPSHIRE	-	-	305	Days
Days to Ripening	2006	DEBEN	CRAMBE	NORTH YORKSHIRE	-	-	304	Days
Days to Ripening	2006	DEBEN	LIMAVADY	CAUSEWAY COAST AND GLENS	-	-	320.33	Days
Days to Ripening	2006	DEBEN	LAURENCEKIRK	ABERDEENSHIRE	-	-	332.67	Days
Days to Ripening	2006	DEBEN	ELGIN	MORAY	-	-	324	Days
Days to Ripening	2006	DEBEN	W-CHARLT	DEVON	-	-	303	Days
Days to Ripening	2006	DEBEN	RHYND	PERTH AND KINROSS	-	-	316	Days
Days to Ripening	2006	DEBEN	T-RAWSTN	DORSET	-	-	281	Days
Days to Ripening	2006	DEBEN	LOCKERBIE	DUMFRIES AND GALLOWAY	-	-	313	Days
Days to Ripening	2006	DEBEN	MORLEYSTBOTOLPH	NORFOLK	-	-	288	Days
Days to Ripening	2006	DEBEN	HYTHE	KENT	-	-	302.67	Days
Days to Ripening	2006	DEBEN	BOWSDN	NORTHUMBERLAND	-	-	315.33	Days
Days to Ripening	2006	DEBEN	RAGNALL	NOTTINGHAMSHIRE	-	-	303.67	Days
Days to Ripening	2006	DEBEN	HISTON	CAMBRIDGESHIRE	-	-	295.33	Days
Days to Ripening	2006	DEBEN	FRAMLINGHAM	SUFFOLK	-	-	302.33	Days
Days to Ripening	2006	DEBEN	FRISBYONTHEWREAKE	LEICESTERSHIRE	-	-	296.33	Days
Days to Ripening	2006	DEBEN	SPALDING	LINCOLNSHIRE	-	-	299	Days
Days to Ripening	2007	DEBEN	WOLFERTON	NORFOLK	-	-	300.33	Days
Days to Ripening	2007	DEBEN	C-CREEVY	BELFAST	-	-	315	Days
Days to Ripening	2007	DEBEN	LAURENCEKIRK	ABERDEENSHIRE	-	-	330.67	Days
Days to Ripening	2007	DEBEN	ULCEBY	NORTH LINCOLNSHIRE	-	-	290	Days
Days to Ripening	2007	DEBEN	POTTN	ABERDEENSHIRE	-	-	354.33	Days
Days to Ripening	2007	DEBEN	HYTHE	KENT	-	-	301.67	Days
Days to Ripening	2007	DEBEN	BOWSDN	NORTHUMBERLAND	-	-	320.33	Days
Days to Ripening	2007	DEBEN	HISTON	CAMBRIDGESHIRE	-	-	296.67	Days
Days to Ripening	2007	DEBEN	SPALDING	LINCOLNSHIRE	-	-	292	Days
Days to Ripening	2007	DEBEN	HUMBIE	EAST LOTHIAN	-	-	336.67	Days
Days to Ripening	2007	DEBEN	CRAMBE	NORTH YORKSHIRE	-	-	319	Days
Days to Ripening	2007	DEBEN	HULL	EAST RIDING OF YORKSHIRE	-	-	296.5	Days
Days to Ripening	2007	DEBEN	RUDSTON	EAST RIDING OF YORKSHIRE	-	-	317	Days
Days to Ripening	2007	DEBEN	UPSOMBORNE	HAMPSHIRE	-	-	312.33	Days
Days to Ripening	2004	DEFENDER	LAURENCEKIRK	ABERDEENSHIRE	OILSEED RAPE	MEDIUM	338	Days
Days to Ripening	2004	DEFENDER	RAGNALL	NOTTINGHAMSHIRE	OILSEED RAPE	MEDIUM	327.7	Days
Days to Ripening	2004	DEFENDER	WATERBEACH	CAMBRIDGESHIRE	BEANS	ORGANIC	286.3	Days
Days to Ripening	2004	DEFENDER	WOLFERTON	NORFOLK	BEANS	DEEP CLAY	306	Days
Days to Ripening	2004	DEFENDER	GIRTON	CAMBRIDGESHIRE	BEANS	DEEP CLAY	302	Days
Days to Ripening	2004	DEFENDER	WYE	KENT	OILSEED RAPE	MEDIUM	321.3	Days
Days to Ripening	2004	DEFENDER	FRISBYONTHEWREAKE	LEICESTERSHIRE	PEAS	DEEP CLAY	303.7	Days
Days to Ripening	2004	DEFENDER	COATES	GLOUCESTERSHIRE	WHEAT	SHALLOW	297	Days
Days to Ripening	2004	DEFENDER	WARWICK	WARWICKSHIRE	WHEAT	DEEP CLAY	303.3	Days
Days to Ripening	2004	DEFENDER	UPSOMBORNE	HAMPSHIRE	PEAS	MEDIUM	314	Days
Days to Ripening	2004	DEFENDER	LIMAVADY	CAUSEWAY COAST AND GLENS	WHEAT	DEEP CLAY	327	Days
Days to Ripening	2004	DEFENDER	HUMBIE	EAST LOTHIAN	WHEAT	MEDIUM	331.3	Days
Days to Ripening	2004	DEFENDER	BOWSDN	NORTHUMBERLAND	WHEAT	DEEP CLAY	329.5	Days
Days to Ripening	2004	DEFENDER	BRAMHAM	LEEDS	OILSEED RAPE	MEDIUM	311	Days
Days to Ripening	2005	DEFENDER	RAGNALL	NOTTINGHAMSHIRE	OILSEED RAPE	MEDIUM	316	Days
Days to Ripening	2005	DEFENDER	CTHORPE	LINCOLNSHIRE	LINSEED	MEDIUM	269.7	Days
Days to Ripening	2005	DEFENDER	WATERBEACH	CAMBRIDGESHIRE	BEANS	ORGANIC	292.3	Days
Days to Ripening	2005	DEFENDER	WOLFERTON	NORFOLK	BEANS	DEEP CLAY	301.7	Days
Days to Ripening	2005	DEFENDER	HISTON	CAMBRIDGESHIRE	BEANS	DEEP CLAY	289	Days
Days to Ripening	2005	DEFENDER	ELGIN	MORAY	POTATO	MEDIUM	309	Days
Days to Ripening	2005	DEFENDER	SPALDING	LINCOLNSHIRE	VEGETABLES	DEEP FERTILE SILTY	283.7	Days
Days to Ripening	2005	DEFENDER	FRAMLINGHAM	SUFFOLK	PEAS	DEEP CLAY	282	Days
Days to Ripening	2005	DEFENDER	NEWCHURCH	KENT	PEAS	DEEP CLAY	313.7	Days
Days to Ripening	2005	DEFENDER	TELFORD	SHROPSHIRE	OILSEED RAPE	MEDIUM	301.7	Days
Days to Ripening	2005	DEFENDER	FRISBYONTHEWREAKE	LEICESTERSHIRE	PEAS	DEEP CLAY	295.7	Days
Days to Ripening	2005	DEFENDER	RHYND	PERTH AND KINROSS	WHEAT	MEDIUM	335	Days
Days to Ripening	2005	DEFENDER	UPSOMBORNE	HAMPSHIRE	GRASS	MEDIUM	308	Days
Days to Ripening	2005	DEFENDER	INCEBLUNDELL	SEFTON	OAT	LIGHT SAND	306.3	Days
Days to Ripening	2005	DEFENDER	LOCKERBIE	DUMFRIES AND GALLOWAY	BARLEY	LIGHT SAND	314	Days
Days to Ripening	2005	DEFENDER	HUMBIE	EAST LOTHIAN	OILSEED RAPE	MEDIUM	336.7	Days
Days to Ripening	2005	DEFENDER	WHITSOME	SCOTTISH BORDERS	WHEAT	DEEP CLAY	324.3	Days
Days to Ripening	2005	DEFENDER	BOWSDN	NORTHUMBERLAND	WHEAT	DEEP CLAY	330.3	Days
Days to Ripening	2005	DEFENDER	BARTHORPE	NORTH YORKSHIRE	OILSEED RAPE	DEEP CLAY	324	Days
Days to Ripening	2005	DEFENDER	HHALL	LEEDS	OILSEED RAPE	SHALLOW	300	Days
Days to Ripening	2012	DELPHI	CROFT-ON-TEES	NORTH YORKSHIRE	-	-	333.67	Days
Days to Ripening	2012	DELPHI	ELLON	ABERDEENSHIRE	-	-	345	Days
Days to Ripening	2012	DELPHI	ST-BOSW	SCOTTISH BORDERS	-	-	343.67	Days
Days to Ripening	2012	DELPHI	BALGONIE	FIFE	-	-	345.67	Days
Days to Ripening	2012	DELPHI	STCHWRTH	CAMBRIDGESHIRE	-	-	299	Days
Days to Ripening	2012	DELPHI	ULCEBY	NORTH LINCOLNSHIRE	-	-	320.67	Days
Days to Ripening	2012	DELPHI	LUTHERMR	ABERDEENSHIRE	-	-	338.33	Days
Days to Ripening	2012	DELPHI	PETHAM	KENT	-	-	308	Days
Days to Ripening	2012	DELPHI	WELBOURN	LINCOLNSHIRE	-	-	329.33	Days
Days to Ripening	2012	DELPHI	HUMBIE	EAST LOTHIAN	-	-	349	Days
Days to Ripening	2012	DELPHI	HINSTOCK	SHROPSHIRE	-	-	322.33	Days
Days to Ripening	2012	DELPHI	LYMM	CHESHIRE EAST	-	-	312.67	Days
Days to Ripening	2012	DELPHI	BARTHORPE	NORTH YORKSHIRE	-	-	322	Days
Days to Ripening	2012	DELPHI	FRAMLINGHAM	SUFFOLK	-	-	319.67	Days
Days to Ripening	2012	DELPHI	ATTLEBRO	NORFOLK	-	-	282	Days
Days to Ripening	2012	DELPHI	ICKLETON	CAMBRIDGESHIRE	-	-	302.33	Days
Days to Ripening	2013	DELPHI	STOWMARKET	SUFFOLK	WHEAT	D-CLAY	300	Days
Days to Ripening	2013	DELPHI	ULCEBY	NORTH LINCOLNSHIRE	OILSEED RAPE	D-CLAY	319	Days
Days to Ripening	2013	DELPHI	LUTHERMR	ABERDEENSHIRE	WHEAT	MEDIUM	290.33	Days
Days to Ripening	2013	DELPHI	WELBOURN	LINCOLNSHIRE	BARLEY	SHALLOW	321.33	Days
Days to Ripening	2013	DELPHI	MOULTON	LINCOLNSHIRE	PEAS	D-SILT	300.67	Days
Days to Ripening	2013	DELPHI	EDGMOND	SHROPSHIRE	OAT	L-SAND	302.67	Days
Days to Ripening	2013	DELPHI	ICKLETON	CAMBRIDGESHIRE	WHEAT	MEDIUM	275	Days
Days to Ripening	2013	DELPHI	ELLON	ABERDEENSHIRE	BARLEY	L-SAND	328	Days
Days to Ripening	2013	DELPHI	ST-BOSW	SCOTTISH BORDERS	POTATO	L-SAND	322	Days
Days to Ripening	2013	DELPHI	BALGONIE	FIFE	OAT	L-SAND	319.67	Days
Days to Ripening	2013	DELPHI	ALKERTON	OXFORDSHIRE	BARLEY	L-SAND	323.67	Days
Days to Ripening	2014	DELPHI	CROFT-ON-TEES	NORTH YORKSHIRE	BEANS	MEDIUM	316.67	Days
Days to Ripening	2014	DELPHI	MORLEYSTBOTOLPH	NORFOLK	OILSEED RAPE	MEDIUM	296	Days
Days to Ripening	2014	DELPHI	ICKLETON	CAMBRIDGESHIRE	WHEAT	MEDIUM	291	Days
Days to Ripening	2014	DELPHI	AUCHNAGATT	ABERDEENSHIRE	WHEAT	L-SAND	340	Days
Days to Ripening	2014	DELPHI	ST-BOSW	SCOTTISH BORDERS	POTATO	L-SAND	322.33	Days
Days to Ripening	2014	DELPHI	BALGONIE	FIFE	OILSEED RAPE	L-SAND	332	Days
Days to Ripening	2014	DELPHI	ALKERTON	OXFORDSHIRE	BEANS	L-SAND	311.67	Days
Days to Ripening	2014	DELPHI	ULCEBY	NORTH LINCOLNSHIRE	OILSEED RAPE	D-CLAY	313.33	Days
Days to Ripening	2014	DELPHI	LUTHERMR	ABERDEENSHIRE	POTATO	MEDIUM	309.33	Days
Days to Ripening	2014	DELPHI	PETHAM	KENT	OAT	MEDIUM	288.33	Days
Days to Ripening	2014	DELPHI	WELBOURN	LINCOLNSHIRE	BARLEY	SHALLOW	304	Days
Days to Ripening	2014	DELPHI	MOULTON	LINCOLNSHIRE	VEGETABLES	D-SILT	298	Days
Days to Ripening	2014	DELPHI	HLEGH	CHESHIRE EAST	WHEAT	MEDIUM	308	Days
Days to Ripening	2014	DELPHI	EDGMOND	SHROPSHIRE	GRASS	MEDIUM	305.67	Days
Days to Ripening	2014	DELPHI	BARTHORPE	NORTH YORKSHIRE	OILSEED RAPE	D-CLAY	311.67	Days
Days to Ripening	2014	DELPHI	SANCTON	EAST RIDING OF YORKSHIRE	OILSEED RAPE	MEDIUM	305	Days
Days to Ripening	2014	DELPHI	BEDFIELD	SUFFOLK	OILSEED RAPE	D-CLAY	300.33	Days
Days to Ripening	2014	DELPHI	FRISBYONTHEWREAKE	LEICESTERSHIRE	OILSEED RAPE	D-CLAY	296.67	Days
Days to Ripening	2015	DELPHI	BARNSTON	ESSEX	WHEAT	D-CLAY	288.33	Days
Days to Ripening	2015	DELPHI	ICKLETON	CAMBRIDGESHIRE	WHEAT	MEDIUM	297	Days
Days to Ripening	2015	DELPHI	ALKERTON	OXFORDSHIRE	BEANS	L-SAND	310	Days
Days to Ripening	2015	DELPHI	CAWOOD	NORTH YORKSHIRE	BEANS	MEDIUM	320	Days
Days to Ripening	2015	DELPHI	ULCEBY	NORTH LINCOLNSHIRE	OILSEED RAPE	D-CLAY	326	Days
Days to Ripening	2015	DELPHI	WYE	KENT	BEANS	MEDIUM	281	Days
Days to Ripening	2015	DELPHI	CROFT-ON-TEES	NORTH YORKSHIRE	BEANS	MEDIUM	333	Days
Days to Ripening	2015	DELPHI	ELMSWELL	SUFFOLK	OILSEED RAPE	MEDIUM	330.67	Days
Days to Ripening	2015	DELPHI	WELBOURN	LINCOLNSHIRE	BARLEY	SHALLOW	321.33	Days
Days to Ripening	2015	DELPHI	HUMBIE	EAST LOTHIAN	OILSEED RAPE	MEDIUM	353	Days
Days to Ripening	2015	DELPHI	BEDFIELD	SUFFOLK	BEANS	D-CLAY	310.33	Days
Days to Ripening	2015	DELPHI	FRISBYONTHEWREAKE	LEICESTERSHIRE	OILSEED RAPE	D-CLAY	306.33	Days
Days to Ripening	2015	DELPHI	MORLEYSTBOTOLPH	NORFOLK	OILSEED RAPE	MEDIUM	304	Days
Days to Ripening	2010	DENMAN	CROFT-ON-TEES	NORTH YORKSHIRE	BEANS	MEDIUM	328	Days
Days to Ripening	2010	DENMAN	C-CREEVY	BELFAST	BARLEY	MEDIUM	325	Days
Days to Ripening	2010	DENMAN	LAURENCEKIRK	ABERDEENSHIRE	OILSEED RAPE	MEDIUM	340.67	Days
Days to Ripening	2010	DENMAN	ELLON	ABERDEENSHIRE	BARLEY	L-SAND	343.67	Days
Days to Ripening	2010	DENMAN	ULCEBY	NORTH LINCOLNSHIRE	OILSEED RAPE	D-CLAY	324	Days
Days to Ripening	2010	DENMAN	NEWCHURCH	KENT	PEAS	D-CLAY	309.33	Days
Days to Ripening	2010	DENMAN	WELBOURN	LINCOLNSHIRE	OILSEED RAPE	SHALLOW	318.33	Days
Days to Ripening	2010	DENMAN	HASELY	WARWICKSHIRE	OILSEED RAPE	MEDIUM	306.33	Days
Days to Ripening	2010	DENMAN	LILLESDN	SOMERSET	WHEAT	MEDIUM	271	Days
Days to Ripening	2010	DENMAN	GIRTON	CAMBRIDGESHIRE	BEANS	MEDIUM	298.33	Days
Days to Ripening	2010	DENMAN	HUMBIE	EAST LOTHIAN	GRASS	MEDIUM	328.33	Days
Days to Ripening	2010	DENMAN	CRAWLY	HAMPSHIRE	OAT	MEDIUM	293	Days
Days to Ripening	2010	DENMAN	FRAMLINGHAM	SUFFOLK	OILSEED RAPE	D-CLAY	290	Days
Days to Ripening	2010	DENMAN	FRISBYONTHEWREAKE	LEICESTERSHIRE	OILSEED RAPE	D-CLAY	300.33	Days
Days to Ripening	2012	DENMAN	CROFT-ON-TEES	NORTH YORKSHIRE	-	-	335	Days
Days to Ripening	2012	DENMAN	ELLON	ABERDEENSHIRE	-	-	342.33	Days
Days to Ripening	2012	DENMAN	ST-BOSW	SCOTTISH BORDERS	-	-	343.67	Days
Days to Ripening	2012	DENMAN	BALGONIE	FIFE	-	-	345.67	Days
Days to Ripening	2012	DENMAN	STCHWRTH	CAMBRIDGESHIRE	-	-	299.33	Days
Days to Ripening	2012	DENMAN	ULCEBY	NORTH LINCOLNSHIRE	-	-	320.33	Days
Days to Ripening	2012	DENMAN	LUTHERMR	ABERDEENSHIRE	-	-	337.33	Days
Days to Ripening	2012	DENMAN	PETHAM	KENT	-	-	308	Days
Days to Ripening	2012	DENMAN	WELBOURN	LINCOLNSHIRE	-	-	328.33	Days
Days to Ripening	2012	DENMAN	HUMBIE	EAST LOTHIAN	-	-	347	Days
Days to Ripening	2012	DENMAN	HINSTOCK	SHROPSHIRE	-	-	318.33	Days
Days to Ripening	2012	DENMAN	LYMM	CHESHIRE EAST	-	-	315.33	Days
Days to Ripening	2012	DENMAN	BARTHORPE	NORTH YORKSHIRE	-	-	321.67	Days
Days to Ripening	2012	DENMAN	FRAMLINGHAM	SUFFOLK	-	-	320.67	Days
Days to Ripening	2012	DENMAN	ATTLEBRO	NORFOLK	-	-	282.67	Days
Days to Ripening	2012	DENMAN	ICKLETON	CAMBRIDGESHIRE	-	-	301.67	Days
Days to Ripening	2013	DENMAN	STOWMARKET	SUFFOLK	WHEAT	D-CLAY	297	Days
Days to Ripening	2013	DENMAN	ULCEBY	NORTH LINCOLNSHIRE	OILSEED RAPE	D-CLAY	320	Days
Days to Ripening	2013	DENMAN	LUTHERMR	ABERDEENSHIRE	WHEAT	MEDIUM	289	Days
Days to Ripening	2013	DENMAN	WELBOURN	LINCOLNSHIRE	BARLEY	SHALLOW	316	Days
Days to Ripening	2013	DENMAN	MOULTON	LINCOLNSHIRE	PEAS	D-SILT	302.67	Days
Days to Ripening	2013	DENMAN	EDGMOND	SHROPSHIRE	OAT	L-SAND	301.67	Days
Days to Ripening	2013	DENMAN	ICKLETON	CAMBRIDGESHIRE	WHEAT	MEDIUM	273	Days
Days to Ripening	2013	DENMAN	ELLON	ABERDEENSHIRE	BARLEY	L-SAND	327.33	Days
Days to Ripening	2013	DENMAN	ST-BOSW	SCOTTISH BORDERS	POTATO	L-SAND	320	Days
Days to Ripening	2013	DENMAN	BALGONIE	FIFE	OAT	L-SAND	319	Days
Days to Ripening	2013	DENMAN	ALKERTON	OXFORDSHIRE	BARLEY	L-SAND	323	Days
Days to Ripening	2012	DICKENS	CROFT-ON-TEES	NORTH YORKSHIRE	-	-	331	Days
Days to Ripening	2012	DICKENS	ELLON	ABERDEENSHIRE	-	-	343	Days
Days to Ripening	2012	DICKENS	ST-BOSW	SCOTTISH BORDERS	-	-	343.67	Days
Days to Ripening	2012	DICKENS	BALGONIE	FIFE	-	-	345	Days
Days to Ripening	2012	DICKENS	STCHWRTH	CAMBRIDGESHIRE	-	-	298	Days
Days to Ripening	2012	DICKENS	ULCEBY	NORTH LINCOLNSHIRE	-	-	320.67	Days
Days to Ripening	2012	DICKENS	LUTHERMR	ABERDEENSHIRE	-	-	337	Days
Days to Ripening	2012	DICKENS	PETHAM	KENT	-	-	307.33	Days
Days to Ripening	2012	DICKENS	WELBOURN	LINCOLNSHIRE	-	-	329.67	Days
Days to Ripening	2012	DICKENS	HUMBIE	EAST LOTHIAN	-	-	347	Days
Days to Ripening	2012	DICKENS	HINSTOCK	SHROPSHIRE	-	-	321	Days
Days to Ripening	2012	DICKENS	LYMM	CHESHIRE EAST	-	-	312.67	Days
Days to Ripening	2012	DICKENS	BARTHORPE	NORTH YORKSHIRE	-	-	321	Days
Days to Ripening	2012	DICKENS	FRAMLINGHAM	SUFFOLK	-	-	318.67	Days
Days to Ripening	2012	DICKENS	ATTLEBRO	NORFOLK	-	-	281.33	Days
Days to Ripening	2012	DICKENS	ICKLETON	CAMBRIDGESHIRE	-	-	304.33	Days
Days to Ripening	2013	DICKENS	STOWMARKET	SUFFOLK	WHEAT	D-CLAY	298	Days
Days to Ripening	2013	DICKENS	ULCEBY	NORTH LINCOLNSHIRE	OILSEED RAPE	D-CLAY	319.33	Days
Days to Ripening	2013	DICKENS	LUTHERMR	ABERDEENSHIRE	WHEAT	MEDIUM	290.33	Days
Days to Ripening	2013	DICKENS	WELBOURN	LINCOLNSHIRE	BARLEY	SHALLOW	318	Days
Days to Ripening	2013	DICKENS	MOULTON	LINCOLNSHIRE	PEAS	D-SILT	300	Days
Days to Ripening	2013	DICKENS	EDGMOND	SHROPSHIRE	OAT	L-SAND	302.67	Days
Days to Ripening	2013	DICKENS	ICKLETON	CAMBRIDGESHIRE	WHEAT	MEDIUM	276	Days
Days to Ripening	2013	DICKENS	ELLON	ABERDEENSHIRE	BARLEY	L-SAND	327.33	Days
Days to Ripening	2013	DICKENS	ST-BOSW	SCOTTISH BORDERS	POTATO	L-SAND	320	Days
Days to Ripening	2013	DICKENS	BALGONIE	FIFE	OAT	L-SAND	318.33	Days
Days to Ripening	2013	DICKENS	ALKERTON	OXFORDSHIRE	BARLEY	L-SAND	323	Days
Days to Ripening	2014	DICKENS	CROFT-ON-TEES	NORTH YORKSHIRE	BEANS	MEDIUM	316.67	Days
Days to Ripening	2014	DICKENS	MORLEYSTBOTOLPH	NORFOLK	OILSEED RAPE	MEDIUM	295.33	Days
Days to Ripening	2014	DICKENS	ICKLETON	CAMBRIDGESHIRE	WHEAT	MEDIUM	291	Days
Days to Ripening	2014	DICKENS	AUCHNAGATT	ABERDEENSHIRE	WHEAT	L-SAND	339.33	Days
Days to Ripening	2014	DICKENS	ST-BOSW	SCOTTISH BORDERS	POTATO	L-SAND	321.67	Days
Days to Ripening	2014	DICKENS	BALGONIE	FIFE	OILSEED RAPE	L-SAND	330	Days
Days to Ripening	2014	DICKENS	ALKERTON	OXFORDSHIRE	BEANS	L-SAND	312.33	Days
Days to Ripening	2014	DICKENS	ULCEBY	NORTH LINCOLNSHIRE	OILSEED RAPE	D-CLAY	312	Days
Days to Ripening	2014	DICKENS	LUTHERMR	ABERDEENSHIRE	POTATO	MEDIUM	308.67	Days
Days to Ripening	2014	DICKENS	PETHAM	KENT	OAT	MEDIUM	285.67	Days
Days to Ripening	2014	DICKENS	WELBOURN	LINCOLNSHIRE	BARLEY	SHALLOW	303.33	Days
Days to Ripening	2014	DICKENS	MOULTON	LINCOLNSHIRE	VEGETABLES	D-SILT	302	Days
Days to Ripening	2014	DICKENS	HLEGH	CHESHIRE EAST	WHEAT	MEDIUM	308	Days
Days to Ripening	2014	DICKENS	EDGMOND	SHROPSHIRE	GRASS	MEDIUM	308.33	Days
Days to Ripening	2014	DICKENS	BARTHORPE	NORTH YORKSHIRE	OILSEED RAPE	D-CLAY	308.33	Days
Days to Ripening	2014	DICKENS	SANCTON	EAST RIDING OF YORKSHIRE	OILSEED RAPE	MEDIUM	303	Days
Days to Ripening	2014	DICKENS	BEDFIELD	SUFFOLK	OILSEED RAPE	D-CLAY	298.33	Days
Days to Ripening	2014	DICKENS	FRISBYONTHEWREAKE	LEICESTERSHIRE	OILSEED RAPE	D-CLAY	292.67	Days
Days to Ripening	2015	DICKENS	BARNSTON	ESSEX	WHEAT	D-CLAY	286.33	Days
Days to Ripening	2015	DICKENS	LIMAVADY	CAUSEWAY COAST AND GLENS	OILSEED RAPE	MEDIUM	332	Days
Days to Ripening	2015	DICKENS	ICKLETON	CAMBRIDGESHIRE	WHEAT	MEDIUM	297.67	Days
Days to Ripening	2015	DICKENS	AUCHNAGATT	ABERDEENSHIRE	BARLEY	L-SAND	360	Days
Days to Ripening	2015	DICKENS	ST-BOSW	SCOTTISH BORDERS	OILSEED RAPE	L-SAND	339	Days
Days to Ripening	2015	DICKENS	BALGONIE	FIFE	OILSEED RAPE	L-SAND	345.67	Days
Days to Ripening	2015	DICKENS	ALKERTON	OXFORDSHIRE	BEANS	L-SAND	313	Days
Days to Ripening	2015	DICKENS	CAWOOD	NORTH YORKSHIRE	BEANS	MEDIUM	315	Days
Days to Ripening	2015	DICKENS	ULCEBY	NORTH LINCOLNSHIRE	OILSEED RAPE	D-CLAY	324.67	Days
Days to Ripening	2015	DICKENS	LUTHERMR	ABERDEENSHIRE	POTATO	MEDIUM	339.67	Days
Days to Ripening	2015	DICKENS	WYE	KENT	BEANS	MEDIUM	279.67	Days
Days to Ripening	2015	DICKENS	CROFT-ON-TEES	NORTH YORKSHIRE	BEANS	MEDIUM	332.33	Days
Days to Ripening	2015	DICKENS	ELMSWELL	SUFFOLK	OILSEED RAPE	MEDIUM	332	Days
Days to Ripening	2015	DICKENS	WELBOURN	LINCOLNSHIRE	BARLEY	SHALLOW	321.33	Days
Days to Ripening	2015	DICKENS	HUMBIE	EAST LOTHIAN	OILSEED RAPE	MEDIUM	350	Days
Days to Ripening	2015	DICKENS	HLEGH	CHESHIRE EAST	WHEAT	MEDIUM	319	Days
Days to Ripening	2015	DICKENS	BEDFIELD	SUFFOLK	BEANS	D-CLAY	309.33	Days
Days to Ripening	2015	DICKENS	FRISBYONTHEWREAKE	LEICESTERSHIRE	OILSEED RAPE	D-CLAY	305.67	Days
Days to Ripening	2015	DICKENS	MORLEYSTBOTOLPH	NORFOLK	OILSEED RAPE	MEDIUM	304	Days
Days to Ripening	2016	DICKENS	THAXTED	ESSEX	OILSEED RAPE	D-CLAY	290.67	Days
Days to Ripening	2016	DICKENS	LIMAVADY	CAUSEWAY COAST AND GLENS	POTATO	D-SILT	309	Days
Days to Ripening	2016	DICKENS	ICKLETON	CAMBRIDGESHIRE	WHEAT	MEDIUM	299	Days
Days to Ripening	2016	DICKENS	AUCHNAGATT	ABERDEENSHIRE	BARLEY	L-SAND	350	Days
Days to Ripening	2016	DICKENS	ST-BOSW	SCOTTISH BORDERS	POTATO	L-SAND	340.33	Days
Days to Ripening	2016	DICKENS	BALGONIE	FIFE	OAT	L-SAND	335.33	Days
Days to Ripening	2016	DICKENS	ALKERTON	OXFORDSHIRE	BEANS	MEDIUM	305	Days
Days to Ripening	2016	DICKENS	CAWOOD	NORTH YORKSHIRE	BEANS	MEDIUM	307	Days
Days to Ripening	2016	DICKENS	ULCEBY	NORTH LINCOLNSHIRE	OILSEED RAPE	D-CLAY	315.33	Days
Days to Ripening	2016	DICKENS	BRECHIN	ANGUS	OILSEED RAPE	MEDIUM	343	Days
Days to Ripening	2016	DICKENS	PETHAM	KENT	BEANS	MEDIUM	302.33	Days
Days to Ripening	2016	DICKENS	ELMSWELL	SUFFOLK	OILSEED RAPE	MEDIUM	317	Days
Days to Ripening	2016	DICKENS	WELBOURN	LINCOLNSHIRE	OILSEED RAPE	SHALLOW	319.33	Days
Days to Ripening	2016	DICKENS	BAINTON	EAST RIDING OF YORKSHIRE	OILSEED RAPE	MEDIUM	312	Days
Days to Ripening	2016	DICKENS	PINCHBECK	LINCOLNSHIRE	POTATO	D-SILT	294	Days
Days to Ripening	2016	DICKENS	HUMBIE	EAST LOTHIAN	OILSEED RAPE	MEDIUM	343.67	Days
Days to Ripening	2016	DICKENS	TIBTHORPE	EAST RIDING OF YORKSHIRE	OILSEED RAPE	MEDIUM	323	Days
Days to Ripening	2016	DICKENS	HLEGH	CHESHIRE EAST	WHEAT	MEDIUM	303	Days
Days to Ripening	2016	DICKENS	FRISBYONTHEWREAKE	LEICESTERSHIRE	OILSEED RAPE	D-CLAY	308.33	Days
Days to Ripening	2017	DICKENS	THAXTED	ESSEX	OILSEED RAPE	D-CLAY	275	Days
Days to Ripening	2017	DICKENS	CALLOW	HEREFORDSHIRE	COUNTY OF	OILSEED RAPE	313.67	Days
Days to Ripening	2017	DICKENS	COWBRIDGE	VALE OF GLAMORGAN	OILSEED RAPE	MEDIUM	297.33	Days
Days to Ripening	2017	DICKENS	FRIDAYTHORPE	NORTH YORKSHIRE	PEAS	SHALLOW	318.67	Days
Days to Ripening	2017	DICKENS	EASTMLLNG	KENT	OAT	MEDIUM	271	Days
Days to Ripening	2017	DICKENS	DEOPHAM	NORFOLK	PEAS	MEDIUM	304.33	Days
Days to Ripening	2017	DICKENS	LIMAVADY	CAUSEWAY COAST AND GLENS	OILSEED RAPE	MEDIUM	293	Days
Days to Ripening	2017	DICKENS	ICKLETON	CAMBRIDGESHIRE	WHEAT	MEDIUM	280	Days
Days to Ripening	2017	DICKENS	BALGONIE	FIFE	OAT	L-SAND	333	Days
Days to Ripening	2017	DICKENS	KELSO	SCOTTISH BORDERS	POTATO	L-SAND	322.33	Days
Days to Ripening	2017	DICKENS	ULCEBY	NORTH LINCOLNSHIRE	OILSEED RAPE	D-CLAY	285.67	Days
Days to Ripening	2017	DICKENS	CROFT-ON-TEES	NORTH YORKSHIRE	OILSEED RAPE	MEDIUM	325	Days
Days to Ripening	2017	DICKENS	BRECHIN	ANGUS	OILSEED RAPE	MEDIUM	339.33	Days
Days to Ripening	2017	DICKENS	ELGIN	MORAY	POTATO	L-SAND	312.67	Days
Days to Ripening	2017	DICKENS	HLEGH	CHESHIRE EAST	WHEAT	MEDIUM	299	Days
Days to Ripening	2017	DICKENS	WELBOURN	LINCOLNSHIRE	OILSEED RAPE	SHALLOW	314	Days
Days to Ripening	2017	DICKENS	BURDON	SUNDERLAND	OILSEED RAPE	MEDIUM	321	Days
Days to Ripening	2017	DICKENS	SPALDING	LINCOLNSHIRE	PEAS	D-SILT	286.67	Days
Days to Ripening	2017	DICKENS	SALTOUN	EAST LOTHIAN	OILSEED RAPE	MEDIUM	344.33	Days
Days to Ripening	2017	DICKENS	FRSTHRP	LINCOLNSHIRE	OILSEED RAPE	D-CLAY	298	Days
Days to Ripening	2017	DICKENS	NORTHDALTON	EAST RIDING OF YORKSHIRE	OILSEED RAPE	MEDIUM	318.67	Days
Days to Ripening	2017	DICKENS	EDGMOND	SHROPSHIRE	OILSEED RAPE	MEDIUM	291	Days
Days to Ripening	2003	DICKSON	ABERDEEN	ABERDEENSHIRE	GRASS	SANDY CLAY LOAM	323.7	Days
Days to Ripening	2003	DICKSON	WORKSOP	NOTTINGHAMSHIRE	VEGETABLES	LIGHT SAND	309	Days
Days to Ripening	2003	DICKSON	WATERBEACH	CAMBRIDGESHIRE	PEAS	PEATY SOIL	279	Days
Days to Ripening	2003	DICKSON	FAKENHAM	NORFOLK	BEET	LIGHT SAND	284	Days
Days to Ripening	2003	DICKSON	ELGIN	MORAY	BARLEY	SANDY CLAY	320	Days
Days to Ripening	2003	DICKSON	WYMONDHAM	NORFOLK	WHEAT	MEDIUM	295	Days
Days to Ripening	2003	DICKSON	SPALDING	LINCOLNSHIRE	PEAS	DEEP FERTILE SILTY	278	Days
Days to Ripening	2003	DICKSON	CANTERBURY	KENT	OILSEED RAPE	DEEP FERTILE SILTY	312	Days
Days to Ripening	2003	DICKSON	MEMOW	LEICESTERSHIRE	OILSEED RAPE	DEEP CLAY	277.7	Days
Days to Ripening	2003	DICKSON	WINCHESTER	HAMPSHIRE	POPPY	MEDIUM	299	Days
Days to Ripening	2003	DICKSON	KINGSTON	DEVON	OAT	CLAY LOAM	304.3	Days
Days to Ripening	2003	DICKSON	LOCKERBIE	DUMFRIES AND GALLOWAY	BARLEY	LIGHT SAND	318	Days
Days to Ripening	2003	DICKSON	LIMAVADY	CAUSEWAY COAST AND GLENS	WHEAT	DEEP CLAY	314	Days
Days to Ripening	2003	DICKSON	HADDINGTON	EAST LOTHIAN	WHEAT	MEDIUM	312.3	Days
Days to Ripening	2003	DICKSON	DUNS	SCOTTISH BORDERS	OILSEED RAPE	DEEP CLAY	322.7	Days
Days to Ripening	2003	DICKSON	CROFT-ON-TEES	NORTH YORKSHIRE	POTATO	DEEP CLAY	319	Days
Days to Ripening	2003	DICKSON	TADCASTER	NORTH YORKSHIRE	POTATO	SHALLOW	306	Days
Days to Ripening	2004	DICKSON	LAURENCEKIRK	ABERDEENSHIRE	OILSEED RAPE	MEDIUM	342	Days
Days to Ripening	2004	DICKSON	RAGNALL	NOTTINGHAMSHIRE	OILSEED RAPE	MEDIUM	328.3	Days
Days to Ripening	2004	DICKSON	WATERBEACH	CAMBRIDGESHIRE	BEANS	ORGANIC	288.3	Days
Days to Ripening	2004	DICKSON	WOLFERTON	NORFOLK	BEANS	DEEP CLAY	307.3	Days
Days to Ripening	2004	DICKSON	GIRTON	CAMBRIDGESHIRE	BEANS	DEEP CLAY	302	Days
Days to Ripening	2004	DICKSON	WYE	KENT	OILSEED RAPE	MEDIUM	322	Days
Days to Ripening	2004	DICKSON	FRISBYONTHEWREAKE	LEICESTERSHIRE	PEAS	DEEP CLAY	303.7	Days
Days to Ripening	2004	DICKSON	COATES	GLOUCESTERSHIRE	WHEAT	SHALLOW	299	Days
Days to Ripening	2004	DICKSON	WARWICK	WARWICKSHIRE	WHEAT	DEEP CLAY	303.3	Days
Days to Ripening	2004	DICKSON	UPSOMBORNE	HAMPSHIRE	PEAS	MEDIUM	311	Days
Days to Ripening	2004	DICKSON	LIMAVADY	CAUSEWAY COAST AND GLENS	WHEAT	DEEP CLAY	327	Days
Days to Ripening	2004	DICKSON	HUMBIE	EAST LOTHIAN	WHEAT	MEDIUM	330.7	Days
Days to Ripening	2004	DICKSON	BOWSDN	NORTHUMBERLAND	WHEAT	DEEP CLAY	330.8	Days
Days to Ripening	2004	DICKSON	BRAMHAM	LEEDS	OILSEED RAPE	MEDIUM	311	Days
Days to Ripening	2005	DICKSON	RAGNALL	NOTTINGHAMSHIRE	OILSEED RAPE	MEDIUM	314	Days
Days to Ripening	2005	DICKSON	CTHORPE	LINCOLNSHIRE	LINSEED	MEDIUM	269	Days
Days to Ripening	2005	DICKSON	WATERBEACH	CAMBRIDGESHIRE	BEANS	ORGANIC	295	Days
Days to Ripening	2005	DICKSON	WOLFERTON	NORFOLK	BEANS	DEEP CLAY	302.7	Days
Days to Ripening	2005	DICKSON	HISTON	CAMBRIDGESHIRE	BEANS	DEEP CLAY	285.7	Days
Days to Ripening	2005	DICKSON	ELGIN	MORAY	POTATO	MEDIUM	314.7	Days
Days to Ripening	2005	DICKSON	SPALDING	LINCOLNSHIRE	VEGETABLES	DEEP FERTILE SILTY	283.3	Days
Days to Ripening	2005	DICKSON	FRAMLINGHAM	SUFFOLK	PEAS	DEEP CLAY	284	Days
Days to Ripening	2005	DICKSON	NEWCHURCH	KENT	PEAS	DEEP CLAY	313.7	Days
Days to Ripening	2005	DICKSON	TELFORD	SHROPSHIRE	OILSEED RAPE	MEDIUM	302	Days
Days to Ripening	2005	DICKSON	FRISBYONTHEWREAKE	LEICESTERSHIRE	PEAS	DEEP CLAY	297	Days
Days to Ripening	2005	DICKSON	RHYND	PERTH AND KINROSS	WHEAT	MEDIUM	335	Days
Days to Ripening	2005	DICKSON	UPSOMBORNE	HAMPSHIRE	GRASS	MEDIUM	305	Days
Days to Ripening	2005	DICKSON	INCEBLUNDELL	SEFTON	OAT	LIGHT SAND	310.3	Days
Days to Ripening	2005	DICKSON	LOCKERBIE	DUMFRIES AND GALLOWAY	BARLEY	LIGHT SAND	314.7	Days
Days to Ripening	2005	DICKSON	HUMBIE	EAST LOTHIAN	OILSEED RAPE	MEDIUM	336	Days
Days to Ripening	2005	DICKSON	WHITSOME	SCOTTISH BORDERS	WHEAT	DEEP CLAY	324.3	Days
Days to Ripening	2005	DICKSON	BOWSDN	NORTHUMBERLAND	WHEAT	DEEP CLAY	330.3	Days
Days to Ripening	2005	DICKSON	BARTHORPE	NORTH YORKSHIRE	OILSEED RAPE	DEEP CLAY	323.3	Days
Days to Ripening	2005	DICKSON	HHALL	LEEDS	OILSEED RAPE	SHALLOW	299	Days
Days to Ripening	2005	DOVER	RAGNALL	NOTTINGHAMSHIRE	OILSEED RAPE	MEDIUM	313.3	Days
Days to Ripening	2005	DOVER	CTHORPE	LINCOLNSHIRE	LINSEED	MEDIUM	269.7	Days
Days to Ripening	2005	DOVER	WATERBEACH	CAMBRIDGESHIRE	BEANS	ORGANIC	289.7	Days
[truncated: 50,155 more rows]

## Sheet: Table S2
Table S1: Summary of BLUE for each trait derived from NVPT
Variety*	Year of first NVPT	End Use Group	Treated Yield (tonnes/ha)	Untreated Yield (tonnes/ha)	Protein Content (%)	Days to Ripening	HFN (seconds)	Specific Weigth (kg/hl)	Treated Height (cm)	Untreated Height (cm)
ACCESS	2002	UFG4	10.2337	7.28443	10.9698	312.078	190.534	75.5769	NA	NA
ALCHEMY	2005	UFG4	10.3658	8.4007	11.3198	312.588	240.494	77.3434	83.8989	86.4265
AMBROSIA	2004	UFG4	10.4035	7.75371	11.5409	310.669	189.715	76.8374	78.3636	80.7012
ARRAN	2002	-	9.82885	6.80003	NA	312.481	NA	NA	NA	NA
BATTALION	2006	UFG2	10.2039	8.30631	12.226	310.722	225.424	75.9035	78.1259	79.9012
BELGRADE	2015	-	11.0245	10.0709	11.1663	310.808	169.722	75.1303	84.0319	84.738
BELUGA	2009	UFG4	10.7546	8.15002	11.0249	310.967	164.143	75.2609	75.861	77.3403
BENNINGTON	2016	UFG4	11.061	10.104	11.2374	312.456	206.982	76.9921	84.9428	86.3966
BENTLEY	2003	-	10.0971	7.50081	11.4122	312.317	244.815	78.9488	NA	NA
BISCAY	2002	-	10.4802	7.80213	NA	311.094	NA	77.1467	NA	NA
BRITANNIA	2014	UFG3	10.9754	8.77344	11.593	312.475	218.933	76.389	83.2749	84.7636
BROMPTON	2004	UFG4	10.5108	7.84971	11.3866	311.218	216.139	73.8172	75.1914	78.099
CASSIUS	2008	UFG4	10.4917	8.0378	11.1827	311.801	166.136	74.7417	79.4395	79.9165
CHILTON	2012	UFG2	10.3182	7.76615	11.8013	312.133	270.819	78.6413	81.0049	82.8994
CLAIRE	2002	UFG3	10.054	7.68377	11.5266	310.785	240.368	76.5048	82.5522	84.2134
COCOON	2010	UFG3	10.5299	8.32514	11.2685	314.644	245.841	76.5335	90.0274	89.5788
CONQUEROR	2008	UFG4	10.925	7.91987	10.9873	312.563	198.288	75.2506	76.9641	81.0321
CONSORT	2002	UFG3	9.78727	6.45078	11.4357	312.88	225.087	76.8105	78.4878	79.5495
CORDIALE	2003	UFG2	10.2678	7.59528	12.1317	309.314	308.181	79.273	74.1212	76.3087
COSTELLO	2015	-	10.8727	9.71688	11.5685	312.751	319.495	80.4382	76.0498	78.6513
COUGAR	2012	UFG4	10.5058	9.87396	10.8743	313.193	192.667	74.0749	79.8144	82.9917
CRUSOE	2012	UFG1	10.4112	8.84134	12.4784	311.707	248.048	77.6509	76.3109	78.5323
CUBANITA	2013	UFG2	10.4358	8.02812	11.5984	311.301	286.441	79.4064	79.926	81.3267
DART	2003	-	9.94968	6.92291	11.6102	313.808	259.936	78.4291	NA	NA
DEBEN	2002	UFG3	10.2801	7.76171	11.0289	312.089	202.256	75.8048	83.2501	86.2107
DEFENDER	2004	-	10.1819	8.07716	11.9237	311.559	242.301	78.241	NA	NA
DELPHI	2012	-	10.6698	8.82097	11.4837	312.189	263.37	75.9817	81.1124	83.8403
DENMAN	2010	UFG4	10.6506	8.29904	10.9801	311.171	224.799	75.395	76.5708	78.2038
DICKENS	2012	UFG4	10.9515	9.08802	11.1277	311.291	234.57	76.0965	82.1846	84.5158
DICKSON	2003	UFG3	10.2305	7.3912	11.3074	312.061	251.852	77.461	NA	NA
DOVER	2005	-	9.87416	7.63798	12.3486	309.601	310.405	76.3137	NA	NA
DUNSTON	2016	UFG4	10.7492	10.3497	11.1686	312.195	192.294	76.364	87.6581	86.4366
DUXFORD	2007	UFG4	10.4929	7.71053	11.0394	312.054	261.823	76.4601	82.0939	86.3107
EDMUNDS	2009	-	10.5413	8.31785	11.193	310.927	252.525	76.4902	75.5096	79.8845
EINSTEIN	2002	UFG2	10.3072	8.02789	11.8972	310.758	267.624	77.3168	79.4512	81.8477
EVOLUTION	2013	UFG4	10.975	9.47017	10.8368	312.968	178.958	74.8188	79.9859	82.6703
FREISTON	2016	UFG4	10.926	10.3126	10.8349	311.455	135.263	76.7234	87.5804	88.6199
GALLANT	2008	UFG1	10.2136	7.31199	11.9458	309.207	298.145	77.2594	78.1929	80.1229
GATSBY	2005	UFG4	10.1452	8.32866	11.3721	313.049	231.987	76.7815	81.6781	84.4862
GLADIATOR	2003	UFG4	10.3718	7.90938	11.679	310.39	261.525	77.2146	76.4162	78.3674
GLASGOW	2004	UFG4	10.6042	7.83121	11.0846	310.762	181.08	76.7555	76.2007	78.2893
GOODWOOD	2002	-	9.88574	7.52055	11.4433	311.394	251.597	74.9618	NA	NA
GRAFTON	2008	UFG4	10.5503	8.63069	11.629	309.651	282.504	78.3586	71.5491	74.4166
GRAHAM	2015	-	11.094	10.4046	11.0538	310.81	264.352	76.3774	80.9384	85.3546
GRAVITAS	2010	UFG4	10.4266	8.20955	11.1254	312.473	215.379	76.6154	83.8635	84.7463
GULLIVER	2006	-	10.1192	8.1949	12.4458	311.383	252.154	76.6118	80.6727	82.1268
HEREFORD	2007	-	10.8687	7.85312	NA	311.064	NA	NA	81.7464	86.156
HEREWARD	2002	UFG1	9.21193	7.1576	12.8701	311.069	235.397	79.1388	80.4609	82.4936
HORATIO	2012	UFG4	10.6308	8.3243	11.2797	311.824	230.167	75.812	82.214	85.2412
HUMBER	2006	UFG4	10.365	7.73723	11.6521	311.109	294.012	76.9072	74.8231	76.4294
HYPERION	2005	UFG4	10.2276	8.02866	12.1642	310.867	205.711	77.886	77.074	78.5246
ICON	2013	UFG3	10.526	8.9805	11.1086	312.136	222.922	76.4515	80.7345	82.691
INVICTA	2009	UFG3	10.4125	8.39242	11.3586	313.423	237.789	75.1603	85.7845	87.2131
ISTABRAQ	2003	UFG4	10.5278	7.89527	10.8887	312.813	203.64	78.1919	86.839	89.7227
JB_DIEGO	2007	UFG4	10.797	8.64437	11.2025	310.964	298.752	77.595	83.4298	85.2452
KETCHUM	2008	UFG2	10.4863	8.30845	11.5395	311.357	257.045	77.5285	83.3665	86.347
KINGDOM	2009	UFG2	10.1779	7.97227	12.2679	309.504	280.869	78.2499	80.8283	83.9545
KIPLING	2005	-	10.3367	7.54033	11.4477	311.409	232.501	75.538	NA	NA
KWS_BARREL	2015	UFG3	11.1183	8.73691	10.922	312.005	194.148	76.9462	79.0288	81.3646
KWS_BASSET	2016	UFG3	10.5258	8.63689	11.2899	312.739	209.107	77.0296	79.2928	83.3232
KWS_CASHEL	2013	UFG2	10.0196	6.85955	11.6923	311.094	255.078	76.9564	80.806	80.7717
KWS_CRISPIN	2015	UFG4	10.9409	10.0822	11.323	312.31	263.699	76.6335	79.1898	83.588
KWS_CROFT	2012	UFG3	10.4443	8.63009	11.3513	311.824	216.5	76.2202	81.0496	83.4376
KWS_CURLEW	2009	-	10.2792	NA	11.5579	309.721	259.456	77.7832	76.1159	80.2631
KWS_GATOR	2012	UFG4	10.7457	8.34911	11.086	311.834	208.057	75.7748	80.2851	81.0487
KWS_HORIZON	2009	-	10.0656	8.03729	11.9708	310.644	270.663	80.1732	78.1541	79.9303
KWS_KERRIN	2016	UFG4	11.1789	9.6026	10.4746	312.325	113.763	75.8328	81.2534	83.4732
KWS_KIELDER	2012	UFG4	10.8663	7.38447	10.7995	313.428	186.217	74.2136	78.2034	79.6216
KWS_LILI	2014	UFG2	10.947	8.54837	11.1579	313.562	282.519	77.0303	76.2544	80.2784
KWS_PODIUM	2010	UFG2	10.4334	8.01318	12.0255	310.579	284.726	79.1618	76.9279	77.9338
KWS_QUARTZ	2009	-	10.1126	8.23604	12.0289	309.491	312.49	76.7502	71.3101	71.5364
KWS_ROWAN	2012	-	10.7268	8.08018	10.9316	312.396	179.545	77.8016	81.8295	84.8039
KWS_SANTIAGO	2010	UFG4	11.0328	8.08752	11.142	312.505	150.269	75.2503	82.7398	84.0367
KWS_SILVERSTONE	2015	UFG4	11.1258	9.55782	11.003	311.729	279.699	78.0444	83.6045	85.3313
KWS_SISKIN	2015	UFG2	11.0302	10.0659	11.4871	311.721	272.576	76.986	77.3583	82.2996
KWS_STERLING	2009	UFG2	10.2611	8.00397	11.6304	311.153	270.981	75.3907	75.5652	77.4856
KWS_TARGET	2010	UFG3	10.2843	7.94007	11.4173	311.664	215.732	76.3015	78.8587	82.3726
KWS_TRINITY	2014	UFG1	10.6366	9.16507	11.5678	312.168	322.288	77.3022	79.0451	81.7854
KWS_ZYATT	2016	UFG1	10.9241	10.2283	11.8114	311.26	247.888	77.8421	76.4598	79.6166
LEEDS	2012	UFG4	10.8905	8.32461	11.0067	313.07	190.646	77.8608	81.3979	82.5643
LG_MOTOWN	2016	UFG4	10.8745	10.3083	11.0608	310.828	196.294	75.5921	77.4828	78.3966
LG_SUNDANCE	2016	UFG4	10.9958	10.3476	10.9333	312.731	141.388	74.2164	82.4992	84.3599
LIMERICK	2007	-	9.91785	7.8059	11.5812	311.511	202.153	75.2479	79.2784	81.6209
MALACCA	2002	UFG1	9.51576	7.02197	12.0938	309.58	308.278	75.5126	78.5805	79.9442
MARKSMAN	2007	UFG2	9.94611	8.24997	12.4876	309.081	250.419	77.0775	78.4845	80.9496
MASCOT	2005	UFG2	9.81394	7.47463	12.2862	310.04	271.922	77.4819	81.7961	85.4433
MONTEREY	2012	-	10.5158	8.47083	11.3806	312.112	224.817	78.638	83.4245	85.1539
MONTY	2007	-	10.3442	7.4584	11.0454	310.828	173.833	74.9463	78.5587	79.1035
MOULTON	2016	UFG4	10.8846	10.2562	11.4352	311.162	240.607	77.3203	82.2469	82.3599
MYRIAD	2012	UFG4	10.6733	7.96909	11.1296	312.76	222.004	76.5841	84.905	85.3179
NAPIER	2002	UFG4	10.3075	7.45725	11.2635	311.743	174.795	75.836	NA	NA
NIJINSKY	2003	UFG3	9.95632	7.46892	11.6273	310.788	217.261	74.9468	NA	NA
OAKLEY	2006	UFG4	10.9171	7.47037	10.6979	311.587	158.18	75.6116	78.6952	80.154
OPTION	2002	UFG2	9.99504	7.52839	11.8262	311.354	268.884	78.874	NA	NA
PANACEA	2013	UFG4	10.8631	7.56423	10.8076	312.633	130.59	76.6762	87.9178	87.0372
PANORAMA	2008	UFG2	10.484	8.46379	11.6663	312.305	243.254	77.4842	82.1211	84.3848
QPLUS	2008	UFG2	9.85079	7.90715	12.37	312.939	224.265	77.4058	82.5048	84.8643
REFLECTION	2014	UFG4	10.955	8.35924	10.9372	310.708	220.427	77.8168	73.7858	77.8224
RELAY	2012	UFG4	10.4933	9.23206	11.4224	311.761	270.867	76.5323	76.2024	80.777
REVELATION	2012	UFG4	10.5473	9.45553	11.2575	314.057	232.135	76.053	81.541	83.8863
RGT_CONVERSION	2014	UFG3	10.3925	8.69649	11.2977	311.936	227.933	76.3206	76.5302	81.0413
RGT_ILLUSTRIOUS	2015	UFG1	10.4025	9.77981	11.7934	312.396	254.005	76.7397	81.3734	85.1163
RIBAND	2002	UFG4	9.84591	6.25131	11.4383	312.541	201.236	74.4369	NA	NA
RICHMOND	2002	UFG4	10.2348	7.65923	11.6998	311.086	258.342	78.5759	NA	NA
ROBIGUS	2002	UFG3	10.4147	7.5124	11.3442	312.176	198.765	76.6435	82.2874	83.2167
SAHARA	2006	-	10.5292	8.18656	10.6892	313.327	196.476	78.9315	87.8775	88.7846
SAVANNAH	2002	UFG4	10.0564	7.12232	10.992	312.704	245.884	76.7632	NA	NA
SAVELLO	2016	UFG4	10.8152	8.81903	11.0046	311.073	189.232	74.4015	82.3716	84.3599
SCORPION_25	2002	-	10.2109	7.49197	11.7239	310.805	307.034	77.6051	NA	NA
SCOUT	2008	UFG3	10.1527	8.47115	11.7947	312.685	222.985	78.1272	81.1856	83.0119
SENATOR	2003	-	10.4456	7.56765	11.5674	310.507	314.565	76.0842	NA	NA
SHABRAS	2016	UFG4	11.1694	9.6976	10.8836	311.232	177.794	75.5609	79.1545	80.4732
SKYFALL	2013	UFG1	10.7488	9.58245	11.8876	311.095	271.814	78.1784	77.9653	77.9412
SMUGGLER	2003	UFG4	10.3559	8.23824	11.4719	311.196	239.374	75.0859	NA	NA
SOISSONS	2002	UFG2	8.91151	6.9501	12.6884	307.606	246.374	79.3788	81.538	NA
SOLSTICE	2002	UFG2	10.0699	7.38562	11.9742	311.055	261.422	78.0596	84.1227	87.2437
SPYDER	2015	-	10.7194	9.64267	11.8074	311.581	264.211	76.2156	84.7808	86.458
STEADFAST	2003	-	10.1445	7.48765	11.6363	312.455	178.923	76.398	NA	NA
STIGG	2010	UFG4	10.2717	8.79395	11.5829	313.159	289.522	74.3393	74.6308	77.0344
TANKER	2002	UFG4	10.1452	7.04728	11.5042	312.819	272.092	75.4076	NA	NA
TELLUS	2002	-	9.67656	7.25581	NA	310.015	NA	NA	NA	NA
TIMBER	2006	UFG4	10.1697	8.67206	12.2004	309.916	253.067	77.5576	77.7315	80.1429
TUXEDO	2010	UFG3	10.2378	8.46727	11.2193	311.887	279.526	74.5351	76.2957	79.6001
TWISTER	2013	UFG4	10.8337	7.84142	11.2941	312.124	167.69	76.8108	81.8754	85.6325
VISCOUNT	2008	UFG4	10.6707	8.47006	10.9737	311.925	168.811	75.7871	76.4827	78.808
WARLOCK_24	2002	-	10.2082	7.4595	NA	310.426	NA	NA	NA	NA
WARRIOR	2009	UFG3	10.3523	8.66253	11.6141	311.481	198.685	74.9066	78.1713	79.6281
WEAVER	2012	-	10.7276	NA	10.9553	311.619	284.175	76.8575	85.531	89.0839
WELFORD	2003	UFG4	10.2476	7.49626	11.451	311.47	259.622	74.5315	NA	NA
WIZARD	2002	UFG3	10.048	7.07982	11.6101	312.067	227.325	76.7345	NA	NA
XI19	2002	UFG1	10.2926	7.60879	11.4521	310.531	276.5	76.1006	85.5449	89.3873
ZEBEDEE	2005	UFG3	10.4591	7.45235	11.2621	310.441	264.842	74.7183	79.3293	80.5463
ZULU	2013	UFG3	10.6568	8.74063	11.2756	311.79	210.722	76.0031	83.1732	85.3476
*Only varieties trialed in more than one year are included

## Sheet: Table S3
Table S3: Finlay wilkinson Slope for yield and end-quality traits in UK wheat varieties
Variety	Treated Yield	Protein Content	Specific Weigth	HFN
ACCESS	0.928833	0.46023	1.09324	0.462979
ALCHEMY	1.11658	1.44988	1.15908	3.15748
AMBROSIA	1.3051	0.738454	0.970825	3.72179
BATTALION	1.20475	0.806845	1.20162	5.17633
BELGRADE	1.01658	1.12651	0.781873	1.84928
BELUGA	1.12125	1.04066	1.03618	2.3827
BRITANNIA	1.11559	1.04965	0.934836	2.95
BROMPTON	1.11838	0.975674	1.10168	3.79549
CASSIUS	1.07555	1.11967	0.934627	2.68675
CHILTON	0.914383	0.932665	1.42084	3.59885
CLAIRE	1.10316	1.22045	1.14749	3.6775
COCOON	1.03166	1.01371	0.748899	0.874281
CONQUEROR	1.25472	1.74392	0.909037	2.64348
CONSORT	0.349408	1.40941	1.13594	3.98737
CORDIALE	0.852513	0.861366	0.993837	3.0589
COSTELLO	1.07775	1.10177	1.01878	2.50922
COUGAR	1.09103	0.870827	0.751209	2.70918
CRUSOE	1.00829	0.999176	1.18047	3.93022
CUBANITA	0.839783	0.724124	1.14525	3.78113
DEBEN	1.179	0.97853	1.30825	3.81492
DELPHI	0.968885	0.78749	0.840509	2.32498
DENMAN	0.922277	0.852065	0.935437	1.23975
DICKENS	0.893651	0.944694	1.06208	3.3835
DICKSON	1.01139	0.941839	0.98712	2.47765
DUXFORD	1.17133	1.3208	1.34964	2.35133
EINSTEIN	0.90225	0.785995	1.22793	3.16647
EVOLUTION	0.974994	0.960352	0.741134	2.59145
GALLANT	0.849234	0.62801	1.21408	5.14475
GATSBY	0.839877	1.17695	1.03204	3.4118
GLADIATOR	1.02058	0.819454	1.02175	3.00226
GLASGOW	1.15947	0.869376	1.01332	3.42239
GRAFTON	1.2115	1.21453	1.43083	5.00639
GRAHAM	0.992853	0.849891	0.876835	2.47538
GRAVITAS	1.08696	0.957726	0.973774	3.23634
HEREWARD	1.12717	1.76581	1.27915	4.84631
HORATIO	0.981103	0.954346	1.08132	2.91066
HUMBER	1.00321	0.75358	1.087	2.39184
HYPERION	1.06709	0.899564	1.11155	6.03789
ICON	1.03984	1.19455	1.22856	1.46445
INVICTA	1.07809	0.894861	1.09851	2.22503
ISTABRAQ	0.759314	1.09319	1.00449	3.9265
JB_DIEGO	0.985054	0.817564	1.19204	2.94988
KETCHUM	1.05824	0.951277	0.984921	1.67842
KWS_BARREL	1.1059	0.913198	0.943522	-0.275095
KWS_CASHEL	0.836689	0.79935	1.17985	2.41115
KWS_CRISPIN	1.04107	1.01522	1.1502	3.53867
KWS_CROFT	1.00428	0.943194	1.23325	3.36999
KWS_GATOR	1.15822	1.16374	1.24477	1.30258
KWS_KIELDER	1.03483	1.08977	1.07363	2.85743
KWS_LILI	1.05365	0.864133	1.1055	3.24294
KWS_PODIUM	0.938548	0.907275	1.1434	3.45651
KWS_SANTIAGO	0.966197	0.910505	1.00739	2.70966
KWS_SILVERSTONE	1.06691	1.02893	1.02293	4.25939
KWS_SISKIN	1.10587	1.11975	1.12904	5.13962
KWS_STERLING	1.30606	1.34808	1.18177	5.34272
KWS_TARGET	1.14187	1.07607	1.33968	4.13475
KWS_TRINITY	1.05249	1.02757	0.987404	2.62567
LEEDS	0.930328	0.610527	0.87091	2.797
MALACCA	0.86358	1.15541	0.91446	3.78641
MARKSMAN	1.12374	1.28914	1.31634	1.22762
MASCOT	0.901437	0.974401	1.07125	3.65567
MONTEREY	0.85649	0.805042	1.12518	2.35965
MYRIAD	1.07616	0.672634	1.04423	2.69157
NAPIER	1.03247	0.912024	1.09155	1.02297
NIJINSKY	1.02289	0.995595	1.01434	4.51504
OAKLEY	1.0259	1.16557	1.04611	3.79243
OPTION	0.998481	1.07362	1.40131	3.39523
PANORAMA	1.25653	1.522	1.47896	3.91629
QPLUS	0.853489	-	-	-
REFLECTION	1.01159	1.00557	0.864953	2.81971
RELAY	1.18665	1.36096	1.19005	2.47501
REVELATION	0.989626	0.918271	1.07814	2.8067
RGT_CONVERSION	0.932778	1.11559	0.828842	3.36402
RGT_ILLUSTRIOUS	1.01987	1.24129	1.08601	3.54037
RIBAND	0.961722	0.233413	0.144576	1.60476
RICHMOND	1.02081	1.06508	0.971057	2.1039
ROBIGUS	0.929763	1.26741	1.02463	3.68395
SAVANNAH	0.988845	0.924452	1.12508	1.71974
SCORPION_25	0.992484	0.963603	1.12221	2.56955
SCOUT	1.13341	0.987451	1.43401	4.01915
SKYFALL	0.957946	1.02123	0.901825	4.82513
SMUGGLER	1.02448	0.993405	1.06069	5.37888
SOISSONS	1.33783	0.96786	1.43894	4.5616
SOLSTICE	0.838556	0.914163	1.21694	3.23033
SPYDER	0.983132	1.16562	1.00152	1.81759
TANKER	0.997444	1.03972	0.866847	0.881048
TIMBER	1.1003	0.980835	1.28017	3.36213
TUXEDO	1.15961	0.928709	0.98759	2.7443
TWISTER	1.04688	1.10704	1.07326	1.1213
VISCOUNT	1.09677	0.990614	0.920438	2.54411
WARRIOR	1.18828	1.10941	1.31005	3.94202
WELFORD	0.974666	1.26306	1.08694	4.049
WIZARD	0.98518	1.03637	1.07059	2.53568
XI19	1.26587	1.11945	1.24273	3.01106
ZEBEDEE	1.00707	1.02861	0.932497	2.33199
ZULU	1.01238	0.901666	0.829385	3.22586

## Sheet: Table S4
Table S4: Genotype data for UK recommended list variety using selected axiom-35K markers.
Axiom Marker ID	Chromosome	Position	Alleles	KWS_ZYATT	CADENZA	KWS_TRINITY	CONSORT	RUSKIN	FLAME	KWS_SISKIN	RIALTO	KWS_CASHEL	HEREWARD	KWS_LILI	WASP	KWS_PODIUM	CHARGER	EQUINOX	KWS_BARREL	MALACCA	KWS_BASSET	REAPER	KWS_CROFT	SAVANNAH	KWS_TARGET	CAPPELLE	VISCOUNT	MOULIN	CONQUEROR	SOISSONS	GRAFTON	VIVANT	KWS_CRISPIN	NAPIER	KWS_KERRIN	CLAIRE	KWS_SILVERSTONE	ROBIGUS	KWS_GATOR	QPLUS	KWS_KIELDER	COCOON	KWS_SANTIAGO	NIJINSKY	KWS_TEMPO	DUXFORD	LEEDS	ACCESS	HARDWICKE
AX-94745699	1A	1235934	T/C	CC	CC	TT	CC	CC	TT	CC	TT	TT	TT	TT	TT	CC	TT	TT	TT	TT	TT	TT	TT	CC	TT	CC	TT	CC	TT	TT	CC	TT	TT	TT	CC	TT	CC	TT	TT	TT	TT	CC	TT	CC	TT	CC	CC	TT	CC
AX-94913549	1A	1236009	T/C	TT	TT	TT	TT	TT	TT	TT	TT	CC	TT	TT	TT	TT	TT	TT	TT	TT	TT	TT	CC	CC	CC	CC	CC	CC	CC	CC	TT	TT	CC	TT	CC	TT	TT	CC	CC	TT	TT	TT	CC	TT	TT	TT	TT	TT	TT
AX-94856564	1A	1337581	C/T	CC	CC	TT	CC	TT	CC	TT	TT	CC	TT	TT	CC	TT	TT	TT	CC	TT	TT	TT	CC	NN	CC	TT	CC	TT	CC	CC	TT	CC	CC	TT	TT	CC	TT	CC	TT	TT	CC	TT	TT	CC	TT	TT	CC	TT	TT
AX-94496430	1A	2377573	G/T	GG	GG	TT	GG	TT	GG	TT	TT	GG	TT	TT	GG	TT	TT	TT	GG	TT	TT	TT	GG	TT	GG	GG	GG	GG	GG	GG	TT	GG	GG	TT	TT	GG	TT	GG	TT	TT	GG	TT	TT	GG	TT	TT	GG	TT	TT
AX-94733072	1A	2378195	C/T	TT	CC	TT	CC	CC	CC	TT	TT	CC	TT	CC	CC	CC	CC	TT	CC	CC	CC	CC	CC	TT	CC	TT	CC	TT	CC	CC	TT	CC	CC	TT	CC	CC	CC	CC	CC	CC	CC	TT	CC	CC	TT	CC	CC	CC	CC
AX-94730812	1A	2540218	G/C	GG	GG	GG	GG	GG	GG	GG	GG	GG	GG	GG	GG	GG	GG	GG	GG	GG	GG	GG	GG	CC	GG	CC	GG	CC	GG	GG	GG	GG	GG	GG	GG	GG	GG	GG	GG	GG	GG	GG	GG	GG	GG	GG	GG	GG	GG
AX-94481428	1A	2540741	T/C	CC	TT	CC	TT	TT	TT	CC	CC	CC	CC	TT	TT	TT	TT	CC	TT	TT	TT	TT	CC	CC	CC	CC	CC	CC	CC	CC	CC	TT	CC	CC	CC	TT	TT	CC	CC	TT	TT	CC	CC	TT	CC	TT	TT	TT	TT
AX-95653435	1A	3256220	A/G	AA	AA	AA	AA	AA	AA	AA	AA	GG	AA	AA	AA	AA	AA	AA	AA	AA	AA	AA	AA	GG	AA	GG	AA	GG	AA	GG	AA	AA	AA	AA	AA	AA	AA	AA	AA	AA	AA	AA	AA	AA	AA	AA	AA	AA	AA
AX-94955419	1A	3449882	C/A	CC	AA	CC	CC	CC	CC	CC	AA	AA	CC	CC	CC	AA	CC	AA	CC	CC	CC	CC	CC	NN	CC	AA	CC	AA	CC	AA	AA	CC	CC	AA	CC	CC	CC	CC	CC	CC	AA	CC	CC	CC	CC	AA	CC	AA	CC
AX-94608213	1A	4048399	C/T	CC	CC	CC	CC	CC	CC	CC	TT	CC	CC	CC	CC	CC	CC	CC	CC	CC	CC	CC	CC	CC	CC	CC	CC	CC	CC	CC	CC	TT	CC	CC	CC	CC	CC	CC	CC	TT	CC	CC	CC	CC	CC	CC	CC	CC	CC
AX-95259248	1A	4063342	A/G	AA	AA	AA	AA	AA	AA	AA	AA	AA	AA	AA	AA	AA	AA	AA	AA	AA	AA	AA	AA	GG	AA	GG	AA	GG	AA	AA	AA	AA	AA	AA	AA	AA	AA	AA	AA	AA	AA	AA	AA	AA	AA	AA	AA	AA	AA
AX-95219658	1A	4812626	G/A	GG	GG	NN	GG	GG	GG	GG	AA	AA	GG	AA	GG	GG	GG	GG	GG	GG	GG	GG	AA	AA	AA	AA	AA	AA	AA	AA	GG	AA	AA	GG	AA	GG	GG	AA	AA	AA	GG	GG	AA	GG	GG	GG	GG	GG	GG
AX-95139456	1A	5025294	G/A	GG	GG	GG	GG	GG	GG	GG	AA	AA	GG	GG	GG	GG	GG	GG	GG	GG	GG	GG	GG	GG	GG	GG	GG	GG	GG	AA	GG	AA	GG	GG	GG	GG	GG	GG	GG	AA	GG	GG	GG	GG	GG	GG	GG	GG	GG
AX-94645067	1A	5235391	A/G	AA	AA	AA	AA	AA	AA	AA	AA	AA	AA	GG	AA	AA	AA	AA	AA	AA	AA	AA	GG	GG	GG	GG	GG	GG	GG	AA	AA	AA	GG	AA	GG	AA	AA	GG	GG	AA	AA	AA	GG	AA	AA	AA	AA	AA	AA
AX-95191967	1A	6517936	T/C	TT	TT	TT	TT	TT	TT	TT	TT	TT	TT	CC	TT	TT	TT	TT	TT	TT	TT	TT	CC	CC	CC	CC	CC	CC	CC	TT	TT	TT	CC	TT	CC	TT	TT	CC	CC	TT	TT	TT	CC	TT	TT	TT	TT	TT	TT
AX-94996750	1A	7774159	A/G	AA	AA	AA	AA	AA	AA	AA	AA	AA	AA	AA	AA	AA	AA	AA	AA	AA	AA	AA	AA	GG	AA	GG	AA	GG	AA	AA	AA	AA	AA	AA	AA	AA	AA	AA	AA	AA	AA	AA	AA	AA	AA	AA	AA	AA	AA
AX-94852104	1A	7962790	A/C	AA	AA	AA	AA	AA	AA	AA	CC	AA	AA	AA	AA	AA	AA	CC	AA	AA	AA	AA	AA	CC	AA	AA	AA	AA	AA	AA	AA	AA	AA	CC	AA	AA	AA	AA	AA	AA	CC	AA	AA	AA	AA	AA	AA	CC	AA
AX-94637309	1A	9123012	C/T	CC	TT	CC	CC	CC	CC	CC	CC	TT	CC	TT	CC	CC	CC	CC	TT	CC	TT	CC	TT	TT	TT	TT	TT	TT	TT	TT	CC	TT	TT	CC	CC	CC	CC	TT	TT	TT	TT	CC	TT	CC	CC	TT	TT	CC	CC
AX-94448081	1A	9551250	A/G	AA	AA	AA	AA	AA	AA	AA	GG	AA	AA	AA	AA	AA	AA	GG	AA	AA	AA	AA	AA	GG	AA	AA	AA	AA	AA	AA	AA	AA	AA	GG	AA	AA	AA	AA	AA	AA	AA	AA	AA	AA	AA	AA	AA	GG	AA
AX-94532387	1A	9588970	C/T	CC	TT	CC	CC	CC	CC	CC	CC	CC	CC	TT	CC	CC	CC	CC	TT	CC	CC	CC	TT	CC	TT	CC	TT	TT	TT	CC	CC	CC	TT	CC	CC	CC	CC	TT	TT	CC	TT	CC	TT	CC	CC	TT	TT	CC	CC
AX-95239997	1A	9642364	C/T	CC	TT	CC	CC	CC	CC	CC	CC	CC	CC	TT	CC	CC	CC	CC	TT	CC	TT	CC	TT	CC	TT	CC	TT	TT	TT	CC	CC	TT	TT	CC	CC	CC	CC	TT	TT	TT	TT	CC	TT	CC	CC	TT	TT	CC	CC
AX-94970991	1A	10136020	C/G	CC	GG	CC	CC	CC	CC	CC	CC	GG	CC	GG	CC	CC	CC	CC	GG	CC	GG	CC	GG	GG	GG	GG	GG	GG	GG	GG	CC	GG	GG	CC	CC	CC	CC	GG	GG	GG	GG	CC	GG	CC	CC	GG	GG	CC	CC
AX-94962749	1A	11566958	T/G	TT	GG	TT	TT	TT	TT	TT	TT	TT	TT	GG	TT	TT	TT	TT	GG	TT	GG	TT	GG	TT	GG	TT	GG	GG	GG	TT	TT	GG	GG	TT	TT	TT	TT	GG	GG	GG	GG	TT	GG	TT	TT	GG	GG	TT	TT
AX-94433740	1A	11584459	G/A	GG	AA	GG	GG	GG	GG	GG	GG	GG	GG	AA	GG	GG	GG	GG	AA	GG	GG	GG	AA	GG	AA	GG	AA	AA	AA	GG	GG	GG	AA	GG	GG	GG	GG	AA	AA	GG	AA	GG	AA	GG	GG	AA	AA	GG	GG
AX-94645932	1A	11633879	G/T	GG	GG	GG	GG	GG	GG	GG	GG	TT	GG	GG	GG	GG	GG	GG	GG	GG	TT	GG	GG	TT	GG	TT	GG	TT	GG	TT	GG	TT	GG	GG	GG	GG	GG	GG	GG	TT	TT	GG	GG	GG	GG	GG	GG	GG	GG
AX-94839893	1A	11643988	T/C	TT	TT	TT	TT	TT	TT	TT	TT	TT	TT	CC	TT	TT	TT	TT	TT	TT	TT	TT	CC	TT	CC	TT	CC	TT	CC	TT	TT	TT	CC	TT	TT	TT	TT	CC	CC	TT	CC	TT	CC	TT	TT	TT	CC	TT	TT
AX-94894061	1A	11670885	A/T	AA	AA	AA	AA	AA	AA	AA	AA	TT	AA	AA	AA	AA	AA	AA	AA	AA	TT	AA	AA	TT	AA	TT	AA	AA	AA	TT	AA	TT	AA	AA	AA	AA	AA	AA	AA	TT	NN	AA	AA	AA	AA	AA	AA	AA	AA
AX-95231896	1A	11722357	G/C	GG	GG	GG	GG	GG	GG	GG	GG	CC	GG	CC	GG	GG	GG	GG	GG	GG	CC	GG	CC	CC	CC	CC	CC	GG	CC	CC	GG	CC	CC	GG	GG	GG	GG	CC	CC	CC	CC	GG	CC	GG	GG	GG	CC	GG	GG
AX-94844830	1A	11822261	C/T	CC	CC	CC	CC	CC	CC	CC	TT	TT	CC	CC	CC	CC	CC	TT	CC	CC	TT	CC	CC	TT	CC	TT	CC	CC	CC	TT	CC	TT	CC	TT	CC	CC	CC	CC	CC	TT	TT	CC	CC	CC	CC	CC	CC	TT	CC
AX-94429735	1A	12181885	G/A	GG	AA	GG	GG	GG	GG	GG	GG	GG	GG	AA	GG	GG	GG	GG	AA	GG	GG	GG	AA	GG	AA	GG	AA	AA	AA	GG	GG	GG	AA	GG	GG	GG	GG	AA	AA	GG	AA	GG	AA	GG	GG	AA	AA	GG	GG
AX-94454241	1A	12366136	C/T	CC	CC	CC	CC	CC	CC	CC	TT	TT	CC	CC	CC	CC	CC	NN	CC	CC	TT	CC	CC	TT	CC	TT	CC	CC	CC	TT	CC	TT	CC	TT	CC	CC	CC	CC	CC	TT	NN	CC	CC	CC	CC	CC	CC	TT	CC
AX-94936001	1A	12369324	G/A	GG	GG	GG	GG	GG	GG	GG	GG	AA	GG	NN	GG	GG	GG	GG	GG	GG	AA	GG	NN	AA	AA	AA	AA	GG	AA	AA	GG	AA	AA	GG	GG	GG	GG	AA	NN	AA	NN	GG	NN	GG	GG	GG	AA	GG	GG
AX-95259891	1A	12369393	C/G	CC	GG	CC	CC	CC	CC	CC	CC	GG	CC	GG	CC	CC	CC	CC	GG	CC	GG	CC	GG	GG	GG	GG	GG	GG	GG	GG	CC	GG	GG	CC	CC	CC	CC	GG	GG	GG	GG	CC	GG	CC	CC	GG	GG	CC	CC
AX-94865067	1A	12504041	C/T	CC	CC	CC	CC	CC	CC	CC	CC	TT	CC	CC	CC	CC	CC	CC	CC	CC	TT	CC	CC	TT	CC	TT	CC	CC	CC	TT	CC	TT	CC	CC	CC	CC	CC	CC	CC	TT	CC	CC	CC	CC	CC	CC	CC	CC	CC
AX-94749397	1A	12680434	A/G	AA	AA	AA	AA	GG	AA	AA	AA	GG	AA	GG	AA	GG	AA	AA	AA	GG	GG	AA	GG	GG	GG	GG	GG	GG	GG	GG	AA	GG	GG	AA	AA	AA	GG	GG	GG	GG	AA	AA	GG	AA	AA	AA	GG	GG	AA
AX-94506844	1A	13319477	G/T	NN	TT	GG	GG	GG	GG	GG	GG	TT	GG	TT	GG	TT	GG	GG	TT	GG	GG	GG	GG	GG	GG	GG	TT	GG	GG	TT	NN	TT	GG	GG	GG	GG	GG	GG	GG	GG	GG	GG	TT	GG	GG	TT	GG	GG	GG
AX-94421583	1A	13354184	C/T	CC	CC	CC	CC	CC	CC	CC	CC	CC	CC	TT	CC	CC	CC	CC	CC	CC	CC	CC	TT	CC	TT	CC	TT	CC	TT	CC	CC	CC	TT	CC	CC	CC	CC	TT	TT	CC	TT	CC	TT	CC	CC	CC	TT	CC	CC
AX-94994812	1A	13767977	G/C	GG	GG	GG	GG	GG	GG	GG	CC	CC	GG	GG	GG	GG	GG	CC	GG	GG	CC	GG	GG	CC	GG	CC	GG	GG	GG	CC	GG	CC	GG	CC	GG	GG	GG	GG	GG	CC	CC	GG	GG	GG	GG	GG	GG	CC	GG
AX-95222692	1A	13943471	T/C	TT	TT	TT	TT	TT	TT	TT	TT	CC	TT	TT	TT	TT	TT	TT	TT	TT	CC	TT	TT	CC	TT	CC	TT	TT	TT	CC	TT	CC	TT	TT	TT	TT	TT	TT	TT	CC	TT	TT	TT	TT	TT	TT	TT	TT	TT
AX-94501544	1A	14046238	C/T	CC	TT	CC	CC	TT	CC	CC	CC	CC	CC	CC	CC	TT	CC	CC	TT	TT	CC	CC	CC	CC	CC	CC	CC	CC	CC	CC	CC	CC	CC	CC	CC	CC	TT	CC	CC	CC	CC	CC	CC	CC	CC	TT	CC	TT	CC
AX-94554622	1A	14046385	C/T	CC	CC	CC	CC	CC	CC	CC	CC	CC	CC	TT	CC	CC	CC	CC	CC	CC	CC	CC	TT	CC	TT	CC	TT	CC	TT	CC	CC	CC	TT	CC	CC	CC	CC	TT	TT	CC	TT	CC	TT	CC	CC	CC	TT	CC	CC
AX-94471485	1A	14077768	T/G	TT	TT	TT	TT	TT	TT	TT	TT	GG	TT	TT	TT	TT	TT	TT	TT	TT	GG	TT	TT	GG	TT	GG	TT	TT	TT	GG	TT	TT	TT	TT	TT	TT	TT	TT	TT	GG	TT	TT	TT	TT	TT	TT	TT	TT	TT
AX-94693693	1A	14130662	G/A	AA	GG	AA	AA	GG	AA	AA	AA	GG	AA	GG	AA	GG	AA	AA	GG	GG	GG	AA	GG	GG	GG	GG	GG	AA	GG	GG	AA	GG	GG	AA	AA	AA	GG	GG	GG	GG	GG	AA	GG	AA	AA	GG	GG	GG	AA
AX-94682405	1A	14144239	A/C	AA	CC	AA	AA	CC	AA	AA	AA	CC	AA	AA	AA	CC	AA	AA	CC	CC	CC	AA	AA	CC	AA	CC	AA	AA	AA	CC	AA	CC	AA	AA	AA	AA	CC	AA	AA	CC	AA	AA	AA	AA	AA	CC	AA	CC	AA
AX-94592076	1A	14145148	A/G	AA	AA	AA	AA	AA	AA	AA	GG	AA	AA	AA	AA	AA	AA	GG	AA	AA	AA	AA	GG	AA	GG	AA	AA	AA	GG	AA	AA	AA	AA	GG	AA	AA	AA	GG	GG	AA	GG	AA	AA	AA	AA	AA	AA	GG	AA
AX-95089648	1A	14469013	C/T	CC	CC	CC	CC	CC	CC	CC	CC	TT	CC	CC	CC	CC	CC	CC	CC	CC	TT	TT	CC	TT	CC	TT	CC	CC	CC	TT	CC	TT	CC	CC	CC	CC	CC	CC	CC	TT	CC	CC	TT	CC	CC	CC	CC	CC	CC
AX-94631457	1A	14506440	G/A	GG	GG	GG	GG	GG	GG	GG	GG	AA	GG	GG	GG	GG	GG	GG	GG	GG	AA	GG	GG	AA	GG	AA	GG	GG	GG	AA	GG	AA	GG	GG	GG	GG	GG	GG	GG	AA	GG	GG	GG	GG	GG	GG	GG	GG	GG
AX-95161376	1A	15182186	G/A	GG	GG	GG	GG	GG	GG	GG	GG	GG	GG	AA	GG	GG	GG	GG	GG	GG	GG	GG	AA	GG	AA	GG	AA	GG	AA	GG	GG	GG	AA	GG	GG	GG	GG	AA	AA	GG	AA	GG	AA	GG	GG	GG	AA	GG	GG
AX-94537312	1A	15194061	G/A	GG	GG	GG	GG	GG	GG	GG	AA	GG	GG	GG	GG	GG	GG	AA	GG	GG	GG	GG	GG	AA	GG	GG	GG	GG	GG	NN	GG	GG	GG	AA	GG	GG	GG	GG	GG	GG	GG	GG	GG	GG	GG	GG	GG	AA	GG
AX-94741322	1A	16375065	A/G	AA	AA	AA	AA	AA	AA	AA	AA	AA	AA	AA	AA	AA	AA	AA	AA	AA	AA	AA	GG	AA	GG	AA	AA	AA	GG	AA	AA	AA	AA	AA	AA	AA	AA	GG	GG	AA	GG	AA	AA	AA	AA	AA	AA	GG	AA
AX-95014454	1A	16390721	G/A	GG	AA	GG	GG	GG	GG	GG	GG	GG	GG	AA	GG	GG	GG	GG	AA	GG	GG	GG	AA	GG	AA	GG	AA	AA	AA	GG	GG	GG	AA	GG	GG	GG	GG	AA	AA	GG	AA	GG	AA	GG	GG	AA	AA	AA	GG
AX-94704082	1A	16433358	G/A	GG	AA	GG	GG	GG	GG	GG	AA	GG	GG	AA	GG	GG	GG	AA	AA	GG	GG	GG	AA	AA	AA	GG	AA	AA	AA	GG	GG	GG	AA	AA	GG	GG	GG	AA	AA	GG	AA	GG	AA	GG	GG	AA	AA	AA	GG
AX-94840099	1A	19893818	C/T	CC	CC	NN	TT	NN	TT	NN	TT	TT	TT	CC	CC	CC	CC	CC	CC	CC	TT	CC	CC	TT	CC	TT	CC	CC	CC	TT	CC	TT	TT	CC	TT	TT	CC	CC	CC	TT	CC	TT	CC	TT	NN	CC	CC	CC	TT
AX-94823774	1A	20158202	G/A	AA	GG	AA	GG	GG	GG	AA	GG	AA	AA	AA	GG	GG	GG	GG	GG	GG	GG	GG	AA	GG	AA	GG	AA	GG	AA	AA	AA	GG	AA	GG	AA	GG	GG	AA	AA	GG	GG	AA	AA	GG	AA	GG	GG	GG	GG
AX-94605574	1A	20436293	C/T	CC	CC	CC	CC	CC	CC	CC	CC	CC	CC	TT	CC	CC	CC	CC	CC	CC	CC	CC	TT	CC	TT	CC	TT	CC	TT	CC	CC	CC	TT	CC	CC	CC	CC	TT	TT	CC	TT	CC	TT	CC	CC	CC	TT	CC	CC
AX-94581035	1A	20538239	G/C	GG	CC	GG	CC	GG	CC	GG	CC	CC	CC	GG	GG	GG	GG	GG	CC	GG	CC	GG	GG	GG	GG	CC	GG	CC	GG	CC	GG	CC	GG	GG	CC	CC	GG	GG	GG	CC	NN	CC	GG	CC	GG	CC	GG	GG	CC
AX-95681746	1A	20889606	C/A	CC	CC	CC	CC	CC	CC	CC	CC	CC	CC	AA	CC	CC	CC	CC	CC	CC	CC	CC	AA	CC	AA	CC	AA	CC	AA	CC	CC	CC	AA	CC	CC	CC	CC	AA	AA	CC	AA	CC	AA	CC	CC	CC	AA	AA	CC
AX-94691648	1A	21096598	C/T	TT	CC	TT	CC	CC	CC	TT	CC	CC	CC	CC	TT	TT	TT	TT	CC	TT	CC	TT	CC	CC	CC	CC	CC	CC	CC	CC	TT	CC	CC	TT	CC	CC	CC	CC	CC	CC	CC	CC	CC	CC	TT	CC	CC	CC	CC
AX-94615199	1A	21624308	G/C	CC	GG	CC	GG	GG	GG	CC	GG	GG	GG	CC	CC	CC	CC	CC	GG	CC	GG	CC	CC	GG	CC	GG	CC	GG	CC	GG	CC	GG	CC	CC	GG	GG	GG	CC	CC	GG	CC	GG	CC	GG	CC	GG	CC	GG	GG
AX-94599217	1A	21624369	G/C	GG	GG	GG	CC	CC	CC	GG	GG	GG	CC	GG	GG	GG	GG	GG	CC	GG	GG	GG	GG	CC	GG	GG	GG	GG	GG	CC	GG	GG	GG	GG	CC	CC	CC	GG	GG	GG	GG	CC	GG	CC	GG	GG	GG	CC	CC
AX-94522144	1A	21760103	A/G	AA	AA	AA	AA	AA	AA	AA	AA	AA	AA	AA	AA	AA	AA	GG	AA	AA	AA	AA	AA	GG	AA	AA	AA	AA	AA	AA	AA	AA	AA	GG	AA	AA	AA	AA	AA	AA	GG	AA	AA	AA	AA	AA	AA	GG	AA
AX-94710260	1A	22045362	T/C	TT	CC	TT	CC	CC	CC	TT	CC	CC	CC	TT	TT	TT	TT	TT	TT	TT	CC	TT	TT	TT	TT	CC	TT	CC	TT	TT	TT	CC	TT	TT	CC	CC	CC	TT	TT	CC	TT	CC	TT	CC	TT	CC	TT	TT	CC
AX-94677073	1A	22288723	G/C	GG	CC	GG	GG	GG	GG	GG	CC	CC	GG	GG	GG	GG	GG	GG	GG	GG	CC	GG	GG	GG	GG	CC	GG	CC	GG	GG	GG	CC	GG	GG	GG	GG	GG	GG	GG	CC	GG	GG	GG	GG	GG	CC	GG	GG	GG
AX-94759417	1A	22535535	C/T	CC	CC	CC	CC	CC	CC	CC	CC	CC	CC	CC	CC	CC	CC	CC	TT	CC	CC	CC	CC	TT	CC	CC	CC	CC	CC	TT	CC	CC	CC	CC	CC	CC	CC	CC	CC	CC	CC	CC	CC	CC	CC	CC	CC	TT	CC
AX-94783290	1A	22615269	T/C	TT	CC	TT	CC	TT	TT	TT	TT	CC	TT	TT	CC	TT	TT	TT	TT	TT	CC	TT	TT	TT	TT	CC	TT	CC	TT	TT	TT	CC	TT	TT	TT	TT	TT	TT	TT	CC	TT	CC	TT	TT	TT	CC	TT	TT	CC
AX-94702650	1A	22615534	T/G	TT	TT	TT	TT	GG	TT	TT	TT	GG	TT	TT	TT	GG	TT	TT	TT	GG	GG	TT	TT	GG	TT	GG	TT	TT	TT	GG	TT	GG	NN	TT	TT	TT	GG	TT	TT	GG	TT	TT	TT	TT	TT	TT	TT	GG	TT
AX-94853626	1A	22627204	C/T	CC	CC	CC	CC	TT	CC	CC	TT	CC	CC	TT	CC	NN	CC	TT	CC	TT	CC	CC	TT	TT	TT	CC	TT	CC	TT	CC	CC	CC	TT	TT	CC	CC	TT	TT	TT	CC	NN	CC	TT	CC	CC	CC	TT	TT	CC
AX-94870284	1A	22627401	C/T	CC	TT	CC	TT	CC	CC	CC	CC	TT	CC	CC	TT	CC	CC	CC	TT	CC	TT	CC	CC	CC	CC	TT	CC	TT	CC	TT	CC	TT	CC	CC	CC	CC	CC	CC	CC	TT	CC	TT	CC	CC	CC	TT	CC	TT	TT
AX-94809631	1A	22631981	G/A	GG	GG	GG	GG	GG	GG	GG	GG	AA	GG	GG	GG	GG	GG	GG	GG	GG	NN	GG	GG	AA	GG	NN	GG	GG	GG	AA	GG	AA	GG	GG	GG	GG	GG	GG	GG	AA	GG	GG	GG	GG	GG	GG	GG	GG	GG
AX-94990255	1A	22656838	C/T	CC	CC	CC	CC	CC	CC	CC	CC	TT	CC	CC	CC	CC	CC	CC	CC	CC	TT	CC	CC	TT	CC	NN	CC	CC	CC	TT	CC	TT	CC	CC	CC	CC	CC	CC	CC	TT	CC	CC	CC	CC	CC	CC	CC	CC	CC
AX-95630408	1A	24247344	C/A	AA	AA	CC	AA	CC	CC	CC	CC	AA	CC	CC	AA	CC	CC	CC	AA	CC	CC	CC	CC	AA	CC	AA	CC	AA	CC	CC	CC	AA	CC	CC	CC	CC	CC	CC	CC	AA	CC	AA	CC	CC	CC	AA	CC	AA	AA
AX-95129506	1A	27360793	A/C	CC	CC	AA	AA	AA	AA	AA	AA	CC	AA	AA	CC	AA	CC	AA	CC	AA	AA	CC	AA	AA	AA	CC	AA	CC	AA	CC	CC	CC	AA	AA	AA	AA	AA	AA	AA	CC	AA	CC	AA	AA	AA	CC	AA	NN	AA
AX-94471435	1A	28361091	C/G	GG	GG	CC	CC	CC	CC	CC	CC	GG	CC	CC	GG	CC	GG	GG	GG	CC	CC	GG	CC	GG	CC	GG	CC	GG	CC	GG	GG	GG	CC	GG	CC	CC	CC	CC	CC	GG	CC	GG	CC	CC	CC	GG	CC	GG	CC
AX-94909290	1A	28916620	C/T	CC	CC	CC	CC	CC	TT	CC	CC	CC	CC	CC	CC	CC	CC	CC	CC	CC	CC	CC	CC	CC	CC	CC	CC	CC	CC	CC	NN	TT	CC	CC	CC	NN	CC	CC	CC	CC	CC	CC	CC	CC	CC	TT	CC	CC	CC
AX-95125583	1A	33227018	G/A	GG	GG	GG	GG	GG	GG	GG	AA	GG	GG	GG	AA	GG	GG	AA	GG	GG	GG	GG	GG	AA	GG	NN	GG	GG	GG	GG	GG	GG	GG	AA	GG	GG	GG	GG	GG	GG	AA	GG	GG	GG	GG	GG	GG	AA	GG
AX-95105622	1A	35939076	T/G	TT	GG	TT	TT	TT	TT	TT	TT	GG	TT	TT	TT	GG	TT	TT	TT	TT	TT	TT	TT	TT	TT	GG	GG	TT	TT	GG	TT	TT	TT	TT	TT	TT	TT	TT	TT	TT	TT	TT	TT	TT	TT	GG	TT	TT	TT
AX-94983068	1A	37480828	T/C	TT	CC	TT	TT	TT	TT	TT	TT	CC	TT	NN	TT	TT	TT	TT	CC	TT	TT	TT	TT	CC	TT	TT	TT	TT	TT	CC	TT	CC	TT	TT	TT	TT	TT	TT	TT	TT	TT	CC	TT	TT	TT	CC	TT	TT	TT
AX-94415898	1A	37501051	G/A	GG	GG	GG	AA	GG	AA	GG	GG	GG	AA	AA	GG	GG	GG	GG	AA	AA	GG	GG	AA	AA	AA	GG	AA	GG	AA	GG	NN	AA	GG	GG	AA	AA	GG	AA	GG	AA	AA	GG	AA	AA	GG	GG	AA	GG	GG
AX-95662307	1A	38731805	G/A	GG	AA	GG	GG	GG	GG	GG	GG	AA	GG	GG	AA	GG	GG	GG	GG	GG	GG	GG	GG	AA	GG	AA	GG	AA	GG	GG	GG	GG	GG	GG	GG	GG	GG	GG	GG	GG	GG	AA	GG	GG	GG	AA	GG	GG	GG
AX-94428433	1A	41710251	G/T	TT	TT	TT	GG	TT	GG	TT	TT	TT	GG	GG	TT	TT	TT	TT	GG	GG	TT	TT	GG	GG	GG	TT	GG	TT	GG	TT	TT	GG	TT	TT	GG	GG	TT	GG	TT	GG	GG	TT	GG	GG	TT	TT	GG	TT	TT
AX-94458136	1A	41830121	G/A	GG	AA	GG	GG	GG	GG	GG	AA	AA	GG	GG	AA	GG	GG	AA	AA	GG	GG	GG	GG	NN	GG	AA	GG	AA	GG	GG	GG	AA	GG	NN	GG	GG	GG	GG	GG	GG	NN	AA	GG	GG	GG	AA	GG	AA	GG
AX-94779479	1A	41872909	T/C	TT	CC	TT	TT	TT	TT	TT	TT	CC	TT	TT	CC	TT	TT	TT	CC	TT	TT	TT	TT	TT	TT	CC	TT	CC	TT	NN	TT	CC	TT	NN	TT	TT	TT	TT	TT	TT	TT	CC	TT	TT	TT	CC	TT	TT	TT
AX-95249526	1A	46238908	A/G	AA	GG	GG	GG	GG	AA	GG	AA	AA	AA	AA	AA	AA	AA	GG	AA	GG	GG	AA	GG	AA	AA	GG	AA	GG	GG	AA	AA	AA	GG	AA	AA	AA	GG	AA	AA	AA	AA	GG	AA	AA	AA	AA	GG	AA	GG
AX-94462183	1A	47824695	A/C	AA	AA	AA	AA	AA	AA	AA	CC	AA	AA	AA	AA	AA	AA	CC	AA	AA	AA	AA	AA	CC	AA	AA	AA	AA	AA	AA	AA	AA	AA	CC	AA	AA	AA	AA	AA	AA	CC	AA	AA	AA	AA	AA	AA	CC	AA
AX-95079481	1A	48773383	A/G	AA	AA	AA	AA	AA	AA	AA	AA	AA	AA	AA	AA	AA	AA	AA	GG	AA	AA	AA	AA	GG	AA	AA	AA	AA	AA	AA	AA	GG	AA	AA	AA	AA	AA	AA	AA	AA	AA	AA	AA	AA	AA	AA	AA	AA	AA
AX-94849540	1A	49097406	G/T	GG	GG	GG	GG	GG	GG	GG	GG	GG	GG	GG	TT	GG	GG	GG	TT	GG	GG	GG	GG	TT	GG	TT	GG	TT	GG	GG	GG	TT	GG	GG	GG	GG	GG	GG	GG	GG	GG	GG	GG	GG	GG	GG	GG	GG	GG
AX-94921612	1A	57635192	C/T	CC	TT	CC	CC	CC	CC	CC	CC	CC	CC	CC	CC	TT	CC	CC	CC	CC	CC	CC	TT	CC	TT	TT	CC	CC	CC	CC	CC	CC	CC	CC	CC	CC	CC	TT	CC	CC	CC	CC	CC	CC	NN	CC	TT	CC	CC
AX-94659564	1A	75717215	A/G	AA	AA	AA	AA	AA	AA	AA	GG	AA	AA	AA	AA	AA	AA	GG	AA	AA	AA	AA	AA	GG	AA	AA	AA	AA	AA	AA	AA	AA	AA	GG	AA	AA	AA	AA	AA	AA	GG	AA	AA	AA	AA	AA	AA	GG	AA
AX-95681807	1A	85831085	A/G	GG	AA	GG	GG	AA	AA	GG	AA	GG	AA	GG	AA	AA	AA	GG	GG	GG	AA	GG	GG	GG	AA	GG	GG	AA	GG	GG	GG	GG	GG	GG	AA	AA	GG	AA	AA	AA	AA	GG	AA	GG	GG	AA	AA	AA	AA
AX-95108053	1A	104229743	A/G	AA	AA	AA	AA	AA	AA	AA	GG	AA	AA	AA	AA	AA	AA	GG	AA	AA	AA	AA	AA	GG	AA	AA	AA	AA	AA	GG	NN	NN	AA	GG	AA	AA	AA	AA	AA	AA	GG	AA	AA	AA	AA	AA	AA	GG	AA
AX-94628265	1A	118509110	G/A	GG	AA	AA	GG	GG	GG	AA	GG	AA	GG	AA	GG	AA	GG	GG	AA	GG	GG	GG	GG	GG	GG	GG	AA	GG	AA	AA	GG	AA	AA	GG	AA	GG	GG	AA	AA	AA	GG	AA	AA	GG	AA	AA	AA	GG	GG
AX-94529448	1A	121740718	T/C	TT	CC	TT	TT	TT	TT	TT	TT	CC	TT	TT	TT	TT	TT	TT	TT	TT	TT	TT	TT	CC	TT	TT	TT	TT	TT	TT	TT	TT	TT	TT	TT	TT	TT	TT	TT	TT	TT	CC	TT	TT	TT	CC	TT	TT	TT
AX-94561596	1A	123549373	G/A	GG	GG	GG	GG	GG	GG	GG	AA	GG	GG	GG	GG	GG	GG	AA	GG	GG	GG	GG	GG	AA	GG	GG	GG	GG	GG	GG	GG	GG	GG	AA	GG	GG	GG	GG	GG	GG	AA	GG	GG	GG	GG	GG	GG	AA	GG
AX-94475415	1A	155764629	A/G	AA	GG	GG	GG	AA	AA	AA	AA	GG	AA	AA	AA	AA	GG	AA	GG	AA	AA	AA	AA	GG	AA	GG	AA	AA	AA	AA	GG	AA	AA	GG	AA	AA	AA	AA	AA	AA	AA	GG	AA	GG	AA	GG	AA	AA	AA
AX-94668903	1A	165173448	A/G	AA	AA	AA	AA	AA	AA	AA	GG	AA	AA	AA	NN	AA	AA	GG	AA	AA	AA	AA	AA	GG	AA	AA	AA	AA	AA	AA	AA	AA	AA	GG	AA	AA	AA	AA	AA	AA	GG	AA	AA	AA	AA	AA	AA	GG	AA
AX-95002032	1A	177477395	A/C	CC	CC	AA	AA	AA	AA	AA	AA	CC	AA	AA	CC	CC	CC	AA	AA	AA	AA	CC	AA	CC	AA	CC	AA	CC	AA	AA	NN	AA	AA	CC	AA	AA	AA	AA	AA	AA	AA	CC	AA	AA	AA	CC	AA	CC	AA
AX-95015657	1A	208725523	C/G	CC	CC	CC	CC	CC	CC	CC	CC	GG	CC	CC	CC	CC	CC	CC	CC	CC	GG	CC	CC	GG	CC	GG	CC	CC	CC	GG	CC	GG	CC	CC	CC	CC	CC	CC	CC	GG	CC	CC	CC	CC	CC	CC	CC	CC	CC
AX-94793337	1A	208725593	A/G	AA	AA	AA	AA	AA	AA	AA	AA	GG	AA	GG	AA	AA	AA	AA	AA	AA	GG	AA	GG	GG	GG	GG	GG	AA	GG	GG	AA	GG	GG	AA	AA	AA	AA	GG	GG	GG	GG	AA	GG	AA	AA	AA	GG	AA	AA
AX-95078311	1A	235652773	G/A	GG	GG	GG	GG	GG	GG	GG	AA	GG	GG	GG	GG	GG	GG	AA	GG	GG	GG	GG	GG	AA	GG	GG	GG	GG	GG	GG	GG	GG	GG	AA	GG	GG	GG	GG	GG	GG	AA	GG	GG	GG	GG	GG	GG	AA	GG
AX-94895111	1A	248613180	C/G	CC	GG	CC	CC	GG	GG	GG	GG	CC	CC	CC	GG	GG	CC	GG	CC	CC	GG	CC	CC	GG	CC	GG	CC	CC	CC	CC	CC	CC	GG	GG	CC	GG	CC	CC	CC	CC	GG	CC	CC	GG	GG	GG	CC	GG	CC
AX-95186418	1A	250196524	G/A	AA	AA	GG	GG	GG	GG	GG	GG	AA	GG	GG	GG	AA	AA	GG	AA	GG	GG	AA	GG	AA	GG	GG	GG	GG	GG	GG	AA	AA	GG	AA	GG	GG	GG	GG	GG	GG	GG	AA	GG	GG	GG	AA	GG	AA	GG
AX-95068986	1A	268389176	G/T	GG	TT	GG	GG	GG	GG	GG	GG	TT	GG	TT	GG	GG	GG	GG	TT	GG	TT	GG	TT	TT	TT	NN	TT	TT	TT	TT	GG	TT	TT	GG	TT	GG	GG	TT	TT	TT	TT	GG	TT	GG	GG	TT	TT	GG	GG
AX-95630456	1A	281656991	G/A	GG	AA	GG	GG	GG	GG	GG	GG	AA	GG	GG	AA	GG	GG	GG	AA	GG	GG	GG	GG	AA	GG	AA	GG	AA	GG	AA	GG	AA	GG	GG	GG	GG	GG	GG	GG	GG	GG	AA	GG	GG	GG	AA	GG	GG	GG
AX-94408765	1A	304038574	T/C	TT	CC	TT	TT	TT	TT	TT	TT	CC	TT	TT	TT	TT	TT	TT	CC	TT	TT	TT	TT	CC	TT	TT	TT	TT	TT	CC	TT	CC	TT	TT	TT	TT	TT	TT	TT	TT	TT	CC	TT	TT	TT	CC	TT	TT	TT
AX-94446416	1A	305003259	G/C	GG	CC	GG	GG	GG	GG	GG	GG	CC	GG	GG	GG	GG	GG	GG	CC	GG	GG	GG	GG	CC	GG	GG	GG	GG	GG	CC	GG	CC	GG	GG	GG	GG	GG	GG	GG	GG	GG	CC	GG	GG	GG	CC	GG	GG	GG
AX-95105199	1A	306112127	A/G	AA	GG	AA	AA	AA	AA	AA	AA	GG	AA	AA	GG	AA	AA	AA	GG	AA	AA	AA	AA	GG	AA	GG	AA	GG	AA	GG	AA	GG	AA	AA	AA	AA	AA	AA	AA	AA	AA	GG	AA	AA	AA	GG	AA	AA	AA
AX-94807461	1A	310869266	G/A	GG	GG	GG	GG	AA	GG	GG	GG	GG	AA	GG	GG	GG	GG	AA	GG	AA	GG	AA	GG	GG	GG	AA	GG	AA	AA	GG	GG	GG	AA	AA	GG	GG	AA	GG	GG	GG	AA	GG	GG	GG	AA	GG	GG	AA	GG
AX-94930108	1A	319320863	T/C	CC	TT	CC	CC	CC	CC	CC	CC	TT	CC	TT	CC	CC	CC	CC	TT	CC	TT	CC	TT	TT	TT	TT	TT	TT	TT	TT	CC	TT	TT	CC	CC	CC	CC	TT	TT	TT	TT	NN	TT	CC	CC	TT	TT	CC	CC
AX-94710221	1A	369994217	C/T	CC	TT	CC	CC	CC	CC	CC	CC	TT	CC	CC	CC	CC	CC	CC	TT	CC	CC	CC	CC	TT	CC	CC	CC	CC	CC	CC	CC	TT	CC	CC	CC	CC	CC	CC	CC	CC	CC	TT	CC	CC	CC	TT	CC	CC	CC
AX-94576591	1A	372225376	C/A	CC	CC	CC	CC	CC	AA	CC	AA	CC	AA	AA	AA	CC	CC	AA	CC	AA	CC	CC	CC	AA	CC	CC	CC	AA	AA	CC	CC	AA	AA	AA	AA	AA	CC	CC	CC	AA	AA	CC	AA	CC	CC	CC	AA	CC	CC
AX-94555133	1A	377429576	C/G	CC	GG	CC	CC	CC	CC	CC	CC	GG	CC	CC	CC	CC	CC	CC	GG	CC	CC	CC	CC	GG	CC	CC	CC	GG	CC	CC	CC	GG	CC	CC	NN	CC	CC	CC	CC	CC	CC	GG	CC	CC	CC	GG	CC	CC	CC
AX-94887841	1A	385668738	C/T	CC	TT	CC	CC	CC	CC	CC	CC	TT	CC	CC	CC	CC	CC	CC	TT	CC	CC	CC	CC	TT	CC	CC	CC	TT	CC	CC	TT	TT	CC	CC	CC	CC	CC	CC	CC	CC	CC	TT	CC	CC	CC	TT	CC	CC	CC
AX-95107625	1A	392393716	G/A	GG	AA	GG	GG	GG	GG	GG	GG	GG	GG	AA	GG	GG	GG	GG	AA	GG	GG	GG	AA	GG	AA	GG	AA	AA	AA	GG	GG	GG	AA	GG	GG	GG	GG	AA	AA	GG	AA	GG	AA	GG	GG	AA	AA	GG	GG
AX-94939314	1A	426923902	A/G	AA	AA	AA	AA	AA	AA	AA	GG	AA	AA	AA	AA	AA	AA	GG	AA	AA	AA	AA	AA	GG	AA	AA	AA	AA	AA	AA	AA	AA	AA	GG	AA	AA	AA	AA	AA	AA	GG	AA	AA	AA	AA	AA	AA	GG	AA
AX-94995156	1A	435063093	A/T	AA	TT	AA	TT	AA	AA	AA	AA	AA	TT	AA	AA	AA	AA	AA	TT	AA	TT	AA	AA	TT	TT	AA	TT	AA	AA	TT	AA	AA	AA	AA	TT	AA	TT	TT	TT	TT	AA	TT	AA	TT	AA	TT	TT	AA	TT
AX-94831368	1A	452020336	T/C	TT	CC	TT	TT	TT	TT	TT	TT	CC	TT	TT	CC	TT	TT	TT	CC	CC	TT	TT	TT	CC	TT	CC	TT	CC	TT	CC	TT	CC	TT	TT	TT	TT	TT	TT	TT	TT	TT	TT	TT	TT	TT	CC	TT	CC	TT
AX-94432777	1A	462435178	A/G	AA	AA	AA	AA	AA	AA	AA	AA	GG	AA	AA	GG	AA	AA	AA	GG	GG	AA	AA	AA	GG	AA	GG	AA	GG	AA	GG	AA	GG	AA	AA	AA	AA	AA	AA	AA	AA	AA	AA	AA	AA	AA	AA	AA	GG	AA
AX-94542559	1A	463195251	A/G	AA	GG	GG	AA	GG	AA	GG	GG	AA	AA	AA	AA	AA	AA	AA	AA	AA	AA	AA	AA	AA	AA	AA	AA	AA	AA	AA	AA	AA	GG	AA	AA	AA	AA	AA	AA	AA	AA	AA	AA	AA	GG	GG	AA	AA	AA
AX-95630916	1A	463813611	A/C	AA	AA	CC	AA	CC	AA	CC	CC	CC	AA	AA	CC	AA	AA	AA	CC	AA	AA	AA	AA	AA	AA	CC	AA	CC	AA	CC	AA	CC	CC	AA	AA	AA	AA	AA	AA	AA	AA	AA	AA	AA	CC	AA	AA	AA	AA
AX-94600055	1A	464793605	C/T	CC	CC	CC	CC	CC	CC	CC	CC	TT	CC	CC	TT	CC	CC	CC	TT	CC	CC	CC	CC	CC	CC	TT	CC	TT	CC	TT	CC	TT	CC	CC	CC	CC	CC	CC	CC	CC	CC	CC	CC	CC	CC	CC	CC	CC	CC
AX-94753347	1A	464797460	T/C	TT	TT	CC	TT	CC	TT	CC	CC	CC	TT	TT	CC	TT	TT	TT	CC	TT	TT	TT	TT	TT	TT	CC	TT	CC	TT	CC	TT	CC	CC	TT	TT	TT	TT	TT	TT	TT	TT	TT	TT	TT	CC	TT	TT	TT	TT
AX-94643380	1A	465249328	A/G	AA	AA	AA	AA	AA	AA	AA	AA	AA	AA	AA	AA	AA	AA	AA	GG	AA	AA	AA	AA	NN	AA	AA	AA	AA	AA	AA	AA	GG	AA	AA	AA	AA	AA	AA	AA	AA	AA	AA	AA	AA	AA	AA	AA	AA	AA
AX-94843097	1A	472429634	C/G	CC	GG	GG	CC	GG	CC	GG	GG	CC	CC	CC	CC	CC	CC	CC	GG	GG	CC	CC	CC	GG	CC	CC	CC	GG	CC	CC	CC	GG	GG	CC	CC	CC	CC	CC	CC	CC	CC	CC	CC	CC	GG	GG	CC	GG	CC
AX-95110122	1A	474197569	A/G	AA	AA	GG	AA	GG	AA	GG	GG	AA	AA	AA	AA	AA	AA	AA	GG	GG	AA	AA	AA	GG	AA	AA	AA	AA	AA	AA	AA	GG	GG	AA	AA	AA	AA	AA	AA	AA	AA	AA	AA	AA	GG	AA	AA	GG	AA
AX-94768074	1A	474699818	C/G	CC	CC	GG	CC	GG	CC	GG	GG	CC	CC	CC	CC	CC	CC	CC	CC	GG	CC	CC	CC	GG	CC	CC	CC	CC	CC	CC	CC	CC	GG	CC	CC	CC	CC	CC	CC	CC	CC	CC	CC	CC	GG	CC	CC	GG	CC
AX-95069018	1A	481652198	A/G	AA	GG	AA	AA	AA	AA	AA	AA	AA	AA	AA	GG	AA	AA	AA	AA	GG	AA	AA	AA	GG	AA	AA	AA	AA	AA	AA	AA	AA	AA	AA	AA	AA	AA	AA	AA	AA	AA	AA	AA	AA	AA	GG	AA	GG	AA
AX-94834373	1A	482761721	C/T	CC	CC	TT	CC	TT	CC	TT	TT	CC	CC	CC	CC	CC	CC	CC	TT	CC	CC	CC	CC	CC	CC	CC	CC	CC	CC	CC	CC	TT	TT	CC	CC	CC	CC	CC	CC	CC	CC	CC	CC	CC	TT	CC	CC	CC	CC
AX-95189357	1A	487739574	A/C	AA	AA	CC	AA	CC	AA	CC	CC	AA	AA	AA	AA	AA	AA	NN	CC	CC	AA	AA	AA	CC	AA	AA	AA	AA	CC	AA	AA	CC	CC	AA	AA	AA	AA	AA	AA	AA	AA	AA	AA	AA	CC	AA	AA	CC	AA
AX-95207978	1A	491149083	G/A	GG	AA	GG	GG	GG	GG	GG	GG	AA	GG	GG	GG	GG	GG	AA	GG	AA	GG	GG	GG	AA	GG	GG	GG	GG	GG	AA	GG	GG	GG	GG	GG	GG	GG	GG	GG	GG	GG	GG	GG	GG	GG	AA	GG	AA	GG
AX-94621604	1A	494026829	C/G	CC	GG	CC	CC	CC	CC	CC	CC	GG	CC	CC	CC	CC	CC	CC	GG	CC	CC	CC	CC	GG	CC	CC	CC	GG	CC	CC	CC	GG	CC	CC	CC	CC	CC	CC	CC	CC	CC	GG	CC	CC	CC	GG	CC	CC	CC
AX-94504536	1A	496304574	A/C	AA	AA	AA	AA	AA	AA	AA	AA	CC	AA	AA	AA	AA	AA	CC	AA	AA	AA	AA	AA	CC	AA	AA	AA	AA	AA	CC	AA	AA	AA	AA	CC	AA	AA	AA	AA	AA	AA	CC	AA	AA	AA	AA	AA	CC	CC
AX-94773962	1A	497507722	G/A	GG	GG	GG	GG	GG	GG	GG	GG	AA	GG	GG	GG	GG	GG	AA	GG	AA	GG	GG	GG	GG	GG	GG	GG	GG	GG	AA	GG	GG	GG	GG	AA	GG	GG	GG	GG	GG	GG	AA	GG	GG	GG	GG	GG	GG	AA
AX-94428373	1A	498540897	A/G	AA	AA	AA	AA	AA	AA	AA	AA	AA	AA	AA	AA	AA	AA	NN	AA	AA	AA	AA	AA	AA	AA	AA	AA	AA	AA	AA	AA	AA	AA	AA	GG	AA	AA	AA	AA	AA	AA	GG	AA	AA	AA	AA	AA	AA	GG
AX-94677601	1A	499444767	G/A	AA	NN	GG	GG	GG	AA	GG	GG	AA	GG	GG	GG	AA	GG	GG	AA	AA	NN	GG	AA	GG	AA	AA	GG	GG	GG	AA	AA	AA	GG	AA	GG	GG	AA	AA	GG	GG	GG	GG	AA	GG	AA	GG	AA	GG	GG
AX-95201261	1A	499786274	C/G	CC	CC	CC	CC	CC	CC	CC	GG	CC	CC	CC	CC	CC	CC	GG	CC	CC	CC	CC	CC	GG	CC	CC	CC	CC	CC	CC	CC	CC	CC	GG	CC	CC	CC	CC	CC	CC	GG	CC	CC	CC	CC	CC	CC	GG	CC
AX-95630534	1A	505270166	A/G	AA	GG	AA	AA	AA	AA	AA	AA	GG	AA	AA	GG	AA	AA	AA	AA	GG	AA	AA	AA	GG	AA	AA	AA	AA	AA	GG	GG	AA	AA	AA	AA	AA	AA	AA	AA	AA	AA	AA	AA	AA	AA	GG	AA	GG	AA
AX-95258395	1A	505524875	G/A	GG	AA	GG	GG	GG	GG	GG	GG	GG	GG	GG	AA	GG	GG	GG	GG	AA	GG	GG	GG	AA	GG	GG	GG	GG	GG	GG	NN	GG	GG	GG	GG	GG	GG	GG	GG	GG	GG	GG	GG	GG	GG	AA	GG	AA	GG
AX-94577478	1A	505879041	T/C	CC	CC	CC	TT	CC	TT	CC	CC	CC	TT	CC	CC	CC	TT	TT	TT	CC	TT	CC	TT	CC	TT	TT	TT	TT	TT	CC	CC	TT	CC	TT	CC	TT	CC	TT	TT	TT	TT	CC	TT	TT	CC	CC	TT	CC	CC
AX-94987165	1A	506854551	C/T	TT	CC	CC	CC	CC	CC	CC	CC	CC	CC	TT	CC	TT	CC	CC	CC	CC	CC	TT	CC	CC	CC	CC	CC	CC	CC	CC	CC	CC	CC	CC	TT	CC	TT	CC	CC	CC	CC	TT	CC	CC	CC	CC	CC	CC	TT
AX-94527824	1A	508636377	C/G	GG	CC	GG	CC	GG	CC	GG	GG	GG	CC	GG	CC	GG	CC	CC	CC	CC	CC	GG	CC	CC	CC	CC	CC	CC	CC	GG	CC	CC	GG	CC	GG	CC	GG	CC	NN	CC	CC	GG	CC	CC	GG	CC	CC	CC	GG
AX-94894618	1A	508914757	A/G	AA	AA	AA	AA	GG	AA	GG	AA	AA	AA	AA	AA	GG	AA	AA	AA	AA	AA	GG	AA	AA	AA	AA	AA	AA	AA	AA	AA	AA	GG	AA	AA	AA	AA	AA	AA	AA	AA	AA	AA	AA	GG	AA	AA	AA	GG
AX-95247618	1A	511101871	A/G	AA	AA	GG	AA	AA	AA	AA	AA	AA	AA	GG	AA	AA	AA	AA	AA	AA	AA	GG	AA	AA	AA	AA	AA	AA	AA	AA	AA	AA	GG	AA	GG	AA	AA	AA	AA	AA	AA	GG	AA	AA	GG	AA	AA	AA	GG
AX-94826839	1A	513624091	A/G	GG	GG	GG	AA	GG	AA	GG	GG	AA	AA	GG	GG	GG	AA	AA	AA	GG	AA	GG	AA	GG	AA	AA	AA	AA	AA	AA	GG	AA	GG	AA	GG	AA	AA	AA	AA	AA	AA	GG	AA	AA	GG	GG	AA	GG	GG
AX-95631320	1A	513661825	C/A	AA	CC	AA	CC	AA	CC	AA	AA	AA	CC	AA	CC	AA	CC	CC	CC	AA	CC	AA	CC	CC	CC	CC	CC	CC	CC	AA	CC	CC	AA	CC	AA	CC	CC	CC	CC	CC	CC	AA	CC	CC	AA	CC	CC	CC	AA
AX-94737712	1A	514691778	G/C	CC	CC	CC	GG	CC	GG	CC	CC	CC	GG	CC	CC	CC	GG	GG	GG	CC	GG	CC	GG	CC	GG	GG	CC	GG	GG	CC	CC	GG	CC	GG	CC	GG	GG	GG	GG	GG	GG	GG	GG	GG	CC	CC	GG	CC	CC
AX-94382781	1A	516373222	T/C	CC	TT	TT	TT	TT	TT	TT	TT	TT	TT	CC	TT	CC	TT	TT	TT	TT	TT	CC	TT	TT	TT	TT	TT	TT	TT	TT	TT	TT	TT	TT	CC	TT	TT	TT	TT	TT	TT	TT	TT	TT	TT	TT	TT	TT	CC
AX-95239187	1A	516568403	A/G	GG	AA	AA	AA	AA	AA	AA	AA	GG	AA	GG	AA	GG	AA	AA	AA	AA	AA	GG	AA	AA	AA	AA	AA	AA	AA	GG	AA	AA	AA	AA	GG	AA	AA	AA	AA	AA	AA	AA	AA	AA	AA	AA	AA	AA	GG
AX-95001649	1A	516786489	A/G	AA	GG	GG	AA	GG	AA	GG	GG	GG	AA	AA	GG	AA	AA	AA	AA	GG	AA	AA	AA	GG	AA	AA	GG	AA	AA	GG	GG	AA	GG	AA	AA	AA	AA	AA	AA	AA	AA	AA	AA	AA	GG	GG	AA	GG	AA
AX-94949146	1A	520580007	A/G	GG	GG	AA	AA	AA	AA	AA	AA	AA	AA	GG	AA	GG	AA	AA	AA	AA	AA	GG	AA	AA	AA	AA	AA	AA	AA	AA	AA	AA	AA	AA	GG	AA	AA	AA	AA	AA	AA	AA	AA	AA	AA	GG	AA	AA	GG
AX-94440483	1A	532815368	A/T	AA	AA	AA	AA	AA	AA	AA	AA	TT	AA	AA	AA	AA	AA	AA	AA	AA	AA	AA	TT	AA	TT	TT	AA	AA	TT	TT	AA	AA	AA	AA	AA	AA	AA	TT	TT	TT	TT	AA	TT	AA	AA	AA	TT	AA	AA
AX-94681397	1A	533147741	G/C	GG	GG	CC	GG	CC	GG	CC	CC	CC	CC	GG	GG	GG	GG	GG	GG	GG	GG	GG	CC	GG	CC	CC	GG	GG	CC	CC	GG	GG	CC	GG	GG	GG	GG	CC	CC	CC	CC	GG	CC	GG	CC	CC	CC	GG	GG
AX-95652758	1A	533445237	G/A	GG	AA	AA	GG	AA	GG	AA	AA	AA	AA	GG	GG	GG	GG	GG	GG	GG	GG	GG	GG	GG	GG	GG	GG	GG	GG	AA	GG	GG	AA	GG	GG	GG	GG	GG	GG	GG	GG	GG	GG	GG	AA	AA	GG	GG	GG
AX-94491186	1A	534271722	T/C	TT	TT	CC	TT	CC	TT	CC	CC	TT	CC	TT	TT	TT	TT	TT	TT	TT	TT	TT	TT	TT	TT	TT	TT	TT	TT	TT	TT	TT	CC	TT	TT	TT	TT	TT	TT	TT	TT	TT	TT	TT	CC	CC	TT	TT	TT
AX-95146857	1A	536939083	A/G	AA	GG	AA	AA	AA	AA	AA	AA	GG	AA	AA	AA	AA	AA	AA	AA	AA	AA	AA	AA	GG	AA	AA	AA	AA	AA	GG	GG	AA	AA	AA	AA	AA	AA	AA	AA	AA	AA	AA	AA	AA	AA	AA	AA	AA	AA
AX-95653947	1A	540051136	G/A	GG	AA	AA	GG	AA	GG	AA	AA	AA	AA	GG	GG	GG	GG	GG	GG	GG	GG	GG	GG	AA	GG	GG	GG	GG	GG	AA	AA	GG	AA	GG	GG	GG	GG	GG	GG	GG	GG	GG	GG	GG	AA	AA	GG	GG	GG
AX-95683952	1A	540051775	G/A	GG	AA	AA	GG	AA	GG	AA	AA	AA	AA	GG	GG	GG	GG	GG	GG	GG	GG	GG	GG	AA	GG	GG	GG	GG	GG	AA	AA	GG	AA	GG	GG	GG	GG	GG	GG	GG	GG	GG	GG	GG	AA	AA	GG	GG	GG
AX-94732589	1A	540153259	T/C	TT	CC	CC	TT	CC	TT	CC	CC	TT	CC	TT	TT	TT	TT	TT	TT	TT	TT	TT	TT	TT	TT	TT	TT	TT	TT	NN	TT	TT	CC	TT	TT	TT	TT	TT	TT	TT	TT	TT	TT	TT	CC	CC	TT	TT	TT
AX-94605082	1A	540337243	T/C	TT	TT	TT	TT	TT	TT	TT	TT	CC	CC	TT	TT	TT	TT	TT	TT	TT	TT	TT	TT	CC	TT	TT	TT	TT	TT	CC	CC	TT	TT	TT	TT	TT	TT	TT	TT	TT	TT	TT	TT	TT	TT	TT	TT	CC	TT
AX-94780664	1A	542439456	C/T	CC	TT	CC	CC	CC	CC	CC	CC	TT	CC	CC	CC	CC	CC	CC	CC	CC	CC	CC	CC	TT	CC	CC	CC	CC	CC	TT	TT	CC	CC	CC	CC	CC	CC	CC	CC	CC	CC	CC	CC	CC	CC	CC	CC	TT	CC
AX-95652964	1A	544170100	A/G	AA	GG	AA	AA	AA	AA	AA	AA	GG	AA	AA	AA	AA	AA	AA	AA	AA	AA	AA	AA	GG	AA	AA	AA	AA	AA	GG	GG	AA	AA	AA	AA	AA	AA	AA	AA	AA	AA	AA	AA	AA	AA	AA	AA	GG	AA
AX-95016738	1A	544603250	C/T	TT	CC	TT	CC	TT	TT	TT	CC	CC	CC	CC	TT	CC	CC	CC	TT	TT	TT	CC	CC	CC	CC	CC	TT	CC	CC	TT	TT	TT	TT	CC	CC	TT	TT	CC	CC	CC	CC	CC	CC	CC	CC	CC	CC	CC	TT
AX-94897743	1A	547299652	G/A	GG	NN	GG	AA	AA	GG	AA	GG	GG	AA	GG	GG	AA	GG	GG	GG	NN	GG	GG	GG	GG	GG	GG	GG	GG	GG	GG	AA	GG	GG	GG	GG	GG	GG	GG	AA	GG	GG	AA	GG	AA	GG	AA	AA	GG	GG
AX-94825044	1A	547384433	G/A	GG	GG	GG	GG	GG	GG	GG	GG	AA	GG	GG	GG	GG	GG	GG	GG	GG	GG	GG	AA	GG	AA	AA	GG	GG	AA	AA	GG	GG	GG	GG	GG	GG	GG	AA	AA	AA	AA	GG	AA	GG	GG	GG	AA	GG	GG
AX-94752491	1A	548510500	A/C	AA	AA	AA	AA	AA	AA	AA	CC	CC	AA	CC	AA	AA	AA	AA	AA	AA	AA	AA	CC	CC	CC	CC	CC	CC	CC	CC	AA	CC	CC	AA	CC	AA	AA	CC	CC	CC	AA	AA	CC	AA	AA	AA	AA	AA	AA
AX-94887580	1A	549053171	G/T	GG	GG	GG	TT	TT	GG	TT	GG	TT	TT	TT	TT	GG	GG	GG	GG	GG	NN	GG	GG	GG	TT	TT	GG	GG	GG	TT	GG	TT	GG	TT	TT	NN	TT	TT	TT	GG	TT	TT	TT	GG	TT	GG	TT	GG	TT
AX-94507285	1A	550444344	T/C	CC	TT	TT	TT	TT	TT	CC	TT	CC	TT	CC	TT	TT	TT	TT	TT	TT	TT	TT	TT	TT	TT	TT	TT	TT	TT	TT	CC	TT	TT	TT	TT	TT	CC	TT	TT	TT	TT	CC	TT	TT	TT	CC	TT	TT	TT
AX-94415574	1A	552907357	A/G	AA	GG	AA	GG	GG	AA	GG	AA	AA	GG	AA	AA	GG	AA	AA	AA	GG	AA	AA	AA	AA	AA	AA	AA	AA	AA	AA	GG	AA	AA	AA	AA	AA	AA	AA	GG	AA	AA	AA	AA	AA	AA	AA	GG	AA	AA
AX-94618546	1A	557975305	A/C	CC	AA	CC	AA	CC	AA	CC	CC	CC	AA	CC	AA	CC	AA	AA	AA	AA	AA	CC	AA	AA	AA	AA	AA	AA	AA	CC	AA	AA	CC	AA	CC	AA	CC	AA	AA	AA	AA	CC	AA	AA	CC	AA	AA	AA	CC
AX-94604685	1A	564405258	G/A	GG	AA	GG	GG	GG	GG	GG	GG	AA	GG	GG	GG	GG	GG	GG	NN	GG	GG	GG	GG	NN	GG	GG	GG	NN	GG	GG	GG	AA	GG	GG	GG	GG	GG	GG	GG	GG	GG	AA	GG	GG	GG	AA	GG	GG	GG
AX-94964067	1A	568547419	G/A	GG	GG	GG	GG	GG	GG	GG	GG	GG	GG	GG	AA	GG	GG	GG	AA	GG	GG	GG	AA	GG	AA	GG	AA	GG	AA	GG	GG	AA	GG	GG	GG	GG	GG	AA	AA	AA	GG	GG	GG	GG	GG	GG	GG	GG	GG
AX-95220910	1A	569451364	A/G	AA	GG	AA	AA	AA	AA	AA	AA	GG	AA	GG	AA	AA	AA	AA	GG	AA	GG	AA	GG	GG	GG	GG	GG	GG	GG	GG	AA	GG	GG	AA	AA	AA	AA	GG	GG	GG	GG	AA	GG	AA	AA	GG	GG	AA	AA
AX-94437619	1A	570366914	T/C	TT	TT	TT	TT	TT	TT	TT	TT	TT	TT	TT	TT	TT	TT	TT	TT	TT	CC	TT	CC	CC	CC	TT	CC	TT	CC	TT	TT	TT	TT	TT	TT	TT	TT	CC	TT	CC	TT	TT	TT	TT	TT	TT	TT	TT	TT
AX-94612457	1A	571586671	G/A	GG	GG	GG	GG	GG	GG	GG	GG	GG	GG	GG	GG	GG	GG	GG	GG	GG	GG	GG	GG	AA	GG	GG	GG	GG	NN	AA	AA	AA	GG	GG	GG	GG	GG	GG	GG	GG	GG	GG	GG	GG	GG	GG	GG	AA	GG
AX-95137931	1A	576778455	C/T	CC	TT	CC	CC	CC	CC	CC	CC	CC	CC	CC	TT	CC	CC	CC	TT	CC	CC	CC	TT	CC	TT	CC	TT	CC	TT	CC	CC	TT	CC	CC	CC	CC	CC	TT	TT	TT	CC	TT	CC	CC	CC	TT	TT	TT	CC
AX-94568594	1A	577079086	T/C	TT	TT	TT	CC	TT	CC	TT	TT	CC	CC	TT	TT	TT	TT	TT	TT	TT	TT	TT	TT	CC	TT	TT	TT	TT	TT	CC	TT	TT	TT	TT	TT	CC	TT	TT	TT	TT	CC	TT	TT	CC	TT	TT	TT	TT	CC
AX-95071510	1A	578939914	A/C	CC	CC	CC	AA	CC	CC	CC	CC	CC	AA	CC	AA	CC	CC	CC	AA	AA	AA	CC	AA	AA	AA	AA	AA	CC	CC	CC	CC	AA	CC	AA	AA	CC	CC	AA	AA	AA	CC	AA	AA	CC	CC	AA	AA	AA	AA
AX-95243556	1A	580424816	C/T	TT	TT	TT	CC	TT	CC	TT	TT	CC	CC	TT	CC	TT	TT	TT	CC	CC	CC	TT	CC	CC	CC	TT	CC	TT	TT	CC	TT	CC	TT	TT	CC	CC	TT	CC	CC	CC	CC	TT	TT	CC	TT	TT	CC	CC	TT
AX-94865142	1A	582745983	G/A	GG	AA	GG	GG	GG	GG	GG	GG	AA	GG	GG	AA	GG	GG	GG	AA	GG	GG	GG	GG	GG	AA	GG	AA	GG	GG	AA	GG	AA	GG	GG	GG	GG	GG	AA	AA	AA	GG	GG	GG	GG	GG	GG	AA	AA	GG
AX-94476549	1A	583296244	T/C	CC	TT	TT	TT	TT	TT	TT	TT	TT	TT	CC	TT	CC	TT	TT	TT	TT	TT	CC	TT	TT	TT	TT	TT	TT	TT	TT	TT	TT	TT	TT	CC	TT	TT	TT	TT	TT	TT	TT	TT	TT	TT	TT	TT	TT	CC
AX-95231133	1A	584673747	C/T	CC	TT	CC	CC	TT	CC	TT	CC	CC	CC	CC	CC	TT	CC	CC	TT	CC	CC	CC	CC	CC	CC	CC	CC	CC	CC	CC	TT	CC	CC	CC	CC	CC	CC	CC	CC	CC	CC	CC	CC	CC	CC	TT	CC	CC	CC
AX-94664571	1A	584682933	T/C	TT	CC	TT	TT	TT	TT	TT	TT	TT	CC	TT	TT	TT	TT	TT	CC	TT	TT	TT	TT	TT	CC	TT	CC	TT	TT	TT	TT	CC	TT	TT	TT	TT	CC	CC	CC	CC	TT	CC	TT	TT	TT	CC	TT	TT	CC
AX-94892480	1A	585626256	G/A	GG	GG	GG	GG	GG	GG	GG	GG	GG	GG	GG	GG	GG	GG	GG	AA	GG	GG	GG	GG	GG	AA	GG	AA	GG	GG	GG	GG	AA	GG	GG	GG	GG	AA	AA	AA	AA	GG	GG	GG	GG	GG	GG	GG	GG	AA
AX-95199255	1A	586314121	C/T	CC	CC	CC	TT	CC	CC	CC	CC	CC	CC	CC	CC	CC	CC	CC	CC	CC	TT	CC	CC	TT	CC	CC	CC	CC	CC	CC	CC	CC	CC	CC	TT	CC	CC	CC	CC	CC	CC	CC	CC	TT	CC	CC	CC	TT	CC
AX-95151237	1A	586914258	C/T	CC	CC	CC	CC	CC	CC	CC	CC	CC	CC	CC	TT	CC	CC	CC	CC	TT	CC	CC	TT	CC	CC	TT	CC	CC	CC	CC	CC	CC	CC	CC	CC	CC	TT	CC	CC	CC	CC	CC	CC	CC	CC	CC	CC	CC	TT
AX-95170516	1A	587360544	C/T	CC	CC	CC	TT	CC	CC	CC	CC	CC	TT	CC	CC	CC	CC	CC	TT	CC	TT	CC	CC	TT	TT	CC	TT	CC	CC	CC	CC	TT	CC	CC	TT	CC	CC	TT	TT	TT	CC	CC	CC	TT	CC	CC	TT	TT	CC
AX-94441185	1A	589444142	C/G	CC	GG	CC	GG	CC	CC	CC	CC	CC	GG	CC	CC	CC	CC	CC	GG	CC	GG	CC	CC	GG	GG	CC	GG	CC	CC	GG	CC	GG	CC	CC	GG	CC	GG	GG	GG	GG	CC	GG	CC	GG	CC	GG	GG	GG	GG
AX-94542766	1A	590342675	T/A	TT	AA	TT	TT	TT	TT	TT	TT	TT	TT	TT	TT	TT	TT	TT	NN	TT	TT	TT	TT	TT	AA	TT	AA	TT	TT	AA	TT	TT	TT	TT	TT	TT	AA	AA	AA	AA	TT	AA	TT	TT	TT	AA	TT	TT	AA
AX-94779840	1A	590649709	G/A	GG	AA	GG	GG	GG	GG	GG	GG	AA	GG	GG	GG	GG	GG	AA	GG	AA	GG	GG	GG	AA	GG	GG	GG	GG	GG	AA	GG	GG	GG	GG	GG	GG	GG	GG	GG	GG	GG	GG	GG	GG	GG	AA	GG	AA	GG
AX-94733833	1A	590758382	G/A	GG	GG	GG	AA	GG	GG	GG	GG	GG	AA	GG	GG	GG	GG	GG	GG	GG	AA	GG	GG	AA	GG	GG	GG	GG	GG	GG	GG	GG	GG	GG	AA	GG	GG	GG	GG	GG	GG	GG	GG	AA	GG	GG	AA	GG	GG
AX-94731696	1A	591091101	C/T	CC	CC	CC	TT	CC	TT	CC	CC	TT	TT	CC	CC	CC	CC	CC	CC	TT	TT	CC	CC	TT	CC	CC	CC	CC	CC	CC	CC	CC	CC	CC	TT	TT	TT	CC	CC	CC	CC	CC	CC	TT	CC	CC	TT	CC	TT
AX-94991487	1A	591092814	C/A	CC	CC	CC	AA	CC	CC	CC	CC	AA	AA	CC	CC	CC	CC	CC	CC	CC	AA	CC	CC	AA	CC	CC	CC	CC	CC	CC	CC	CC	CC	CC	AA	CC	CC	CC	CC	CC	CC	CC	CC	AA	CC	CC	AA	CC	CC
AX-95630536	1A	591147282	A/G	AA	AA	AA	GG	AA	GG	AA	AA	GG	GG	AA	AA	AA	AA	AA	GG	GG	GG	AA	AA	GG	GG	AA	GG	AA	AA	AA	AA	AA	AA	AA	GG	GG	GG	GG	GG	GG	AA	AA	AA	GG	AA	AA	GG	AA	GG
AX-94789084	1A	591612668	T/G	TT	TT	TT	GG	TT	GG	TT	TT	GG	TT	TT	TT	TT	TT	TT	TT	GG	GG	TT	TT	GG	TT	TT	TT	TT	TT	TT	TT	TT	TT	TT	GG	GG	GG	TT	TT	TT	TT	TT	TT	GG	TT	TT	GG	TT	GG
AX-94942875	1A	592088970	C/G	CC	CC	CC	GG	CC	CC	CC	CC	GG	CC	CC	CC	CC	CC	CC	CC	CC	GG	CC	CC	GG	CC	CC	CC	CC	CC	CC	CC	CC	CC	CC	GG	CC	GG	CC	CC	CC	CC	CC	CC	GG	CC	CC	GG	CC	GG
AX-94527815	1B	717002	A/G	NN	GG	AA	AA	AA	AA	AA	GG	GG	AA	AA	AA	GG	AA	GG	AA	AA	AA	AA	AA	GG	AA	AA	AA	AA	AA	GG	GG	AA	AA	GG	AA	AA	AA	AA	AA	AA	GG	AA	AA	AA	AA	GG	AA	GG	NN
AX-94674257	1B	1203798	C/A	CC	AA	CC	CC	CC	CC	CC	CC	AA	CC	CC	CC	CC	CC	CC	CC	CC	CC	CC	CC	CC	CC	CC	CC	AA	CC	AA	CC	CC	CC	CC	CC	CC	CC	CC	CC	CC	AA	CC	CC	CC	CC	CC	CC	CC	CC
AX-94649854	1B	1419503	G/A	GG	GG	GG	GG	GG	GG	GG	AA	GG	GG	GG	GG	GG	GG	AA	GG	GG	GG	GG	GG	AA	GG	GG	GG	GG	GG	GG	GG	GG	GG	AA	GG	GG	GG	GG	GG	GG	AA	GG	GG	GG	GG	GG	GG	AA	GG
AX-94564319	1B	1430880	G/A	AA	GG	GG	AA	AA	GG	AA	GG	GG	GG	GG	GG	GG	GG	GG	GG	GG	GG	GG	GG	GG	GG	GG	GG	GG	GG	GG	GG	GG	GG	GG	AA	GG	AA	GG	GG	GG	GG	AA	GG	AA	GG	GG	AA	GG	AA
AX-94614966	1B	1433710	C/T	TT	TT	CC	TT	TT	CC	TT	CC	CC	CC	CC	CC	TT	CC	CC	CC	CC	CC	CC	CC	CC	CC	CC	CC	TT	CC	CC	TT	CC	CC	CC	TT	CC	TT	CC	CC	CC	CC	TT	CC	TT	CC	TT	TT	CC	TT
AX-95092361	1B	1434025	A/C	CC	CC	AA	CC	AA	AA	AA	AA	AA	AA	AA	AA	AA	AA	AA	AA	AA	AA	AA	AA	AA	AA	AA	AA	CC	AA	AA	AA	AA	AA	AA	AA	AA	AA	AA	AA	AA	AA	AA	AA	CC	AA	AA	CC	AA	AA
AX-94647324	1B	1471892	C/T	CC	CC	TT	CC	CC	TT	CC	CC	TT	TT	TT	TT	CC	TT	CC	TT	TT	TT	TT	TT	CC	TT	TT	TT	CC	TT	TT	CC	TT	TT	CC	CC	TT	CC	TT	TT	TT	CC	CC	TT	CC	TT	CC	CC	CC	CC
AX-94971367	1B	1523382	A/G	AA	AA	GG	AA	GG	AA	GG	AA	AA	GG	GG	AA	AA	GG	AA	AA	GG	GG	GG	AA	AA	AA	AA	AA	AA	AA	AA	AA	AA	AA	AA	GG	AA	GG	AA	GG	GG	AA	GG	GG	AA	GG	AA	AA	AA	GG
AX-94409545	1B	1827091	A/C	CC	CC	AA	CC	CC	AA	CC	AA	CC	AA	AA	AA	CC	AA	AA	AA	AA	AA	AA	AA	CC	AA	CC	AA	CC	AA	CC	CC	CC	AA	AA	CC	AA	CC	AA	AA	AA	AA	CC	CC	CC	AA	CC	CC	AA	CC
AX-94387787	1B	1969287	G/A	GG	AA	GG	GG	GG	GG	GG	GG	AA	GG	GG	GG	AA	GG	GG	GG	GG	GG	GG	GG	GG	GG	GG	GG	GG	GG	AA	AA	GG	GG	GG	GG	GG	GG	GG	GG	GG	GG	GG	GG	GG	GG	AA	GG	GG	GG
AX-94768522	1B	3162959	T/C	TT	CC	TT	TT	TT	TT	TT	CC	TT	TT	TT	TT	CC	TT	CC	TT	TT	TT	TT	TT	CC	TT	TT	TT	TT	TT	NN	CC	TT	TT	CC	TT	TT	TT	TT	TT	TT	CC	TT	TT	TT	TT	CC	TT	CC	TT
AX-94642563	1B	3180997	C/G	GG	CC	CC	GG	GG	CC	GG	CC	CC	CC	CC	CC	CC	CC	CC	CC	CC	CC	CC	CC	CC	CC	CC	CC	CC	CC	CC	CC	GG	CC	CC	GG	CC	GG	CC	CC	CC	CC	GG	GG	GG	CC	CC	GG	CC	GG
AX-94426237	1B	3656791	T/C	TT	TT	TT	TT	TT	TT	TT	TT	NN	TT	TT	TT	TT	TT	TT	TT	TT	TT	TT	TT	CC	TT	CC	TT	CC	TT	NN	TT	TT	TT	TT	TT	TT	TT	TT	TT	TT	TT	TT	TT	TT	TT	TT	TT	TT	TT
AX-94550967	1B	4340397	C/T	CC	TT	CC	CC	CC	CC	CC	CC	CC	CC	CC	CC	TT	CC	CC	CC	CC	CC	CC	CC	CC	CC	CC	CC	CC	CC	CC	TT	CC	CC	CC	CC	CC	CC	CC	CC	CC	CC	CC	CC	CC	CC	TT	CC	CC	CC
AX-94925767	1B	4464579	G/C	GG	CC	GG	GG	GG	GG	GG	CC	CC	GG	GG	GG	CC	GG	CC	GG	GG	GG	GG	GG	CC	GG	GG	GG	GG	GG	CC	CC	GG	GG	CC	GG	GG	GG	GG	GG	GG	CC	GG	GG	GG	GG	CC	GG	CC	GG
AX-94563702	1B	6350685	T/C	TT	TT	TT	TT	TT	TT	TT	CC	CC	TT	TT	TT	TT	TT	CC	TT	TT	TT	TT	TT	CC	TT	TT	TT	TT	TT	CC	TT	TT	TT	CC	TT	TT	TT	TT	TT	TT	CC	TT	TT	TT	TT	TT	TT	CC	TT
AX-94897199	1B	7369987	T/C	TT	CC	TT	CC	TT	TT	TT	TT	CC	CC	CC	TT	CC	TT	TT	CC	TT	TT	TT	CC	TT	CC	TT	CC	TT	TT	CC	TT	TT	TT	TT	CC	TT	TT	CC	CC	CC	TT	CC	TT	CC	TT	CC	CC	TT	TT
AX-95232570	1B	7479810	G/C	GG	CC	GG	GG	GG	CC	GG	NN	NN	GG	GG	GG	CC	GG	GG	CC	GG	CC	GG	CC	GG	GG	GG	CC	GG	CC	GG	GG	GG	GG	GG	CC	CC	GG	CC	CC	CC	NN	CC	CC	GG	GG	CC	CC	GG	GG
AX-94410507	1B	8223916	T/C	CC	TT	TT	TT	TT	TT	TT	TT	TT	TT	TT	TT	TT	TT	TT	TT	TT	TT	CC	TT	TT	TT	TT	TT	TT	TT	TT	TT	CC	TT	TT	TT	TT	TT	TT	TT	TT	TT	TT	CC	TT	TT	TT	TT	TT	TT
AX-94454402	1B	9264451	G/A	GG	AA	AA	AA	AA	AA	AA	GG	GG	AA	GG	AA	AA	AA	GG	GG	AA	AA	GG	GG	GG	GG	AA	GG	AA	GG	GG	AA	GG	GG	GG	AA	AA	AA	GG	GG	GG	GG	AA	GG	AA	AA	AA	AA	GG	AA
AX-94632731	1B	9599103	A/G	AA	GG	AA	GG	AA	AA	AA	AA	GG	GG	GG	AA	GG	GG	AA	GG	AA	AA	AA	GG	AA	GG	AA	GG	AA	GG	GG	NN	AA	GG	AA	GG	AA	GG	GG	GG	GG	AA	GG	AA	AA	AA	GG	AA	AA	AA
AX-94790297	1B	9715495	G/A	GG	AA	AA	AA	AA	AA	AA	GG	GG	AA	GG	AA	AA	AA	GG	GG	AA	AA	GG	GG	GG	GG	AA	GG	AA	GG	GG	AA	GG	GG	GG	AA	AA	AA	GG	GG	GG	GG	AA	GG	AA	AA	AA	AA	GG	AA
AX-94801428	1B	9936462	T/G	TT	TT	GG	TT	GG	GG	GG	GG	TT	TT	TT	GG	TT	TT	GG	TT	GG	GG	TT	TT	GG	TT	GG	TT	GG	TT	TT	TT	TT	TT	GG	TT	GG	TT	TT	TT	TT	GG	TT	TT	GG	GG	TT	GG	GG	GG
AX-95086602	1B	10080667	C/A	CC	CC	CC	CC	CC	CC	CC	CC	NN	CC	AA	CC	CC	CC	CC	AA	CC	CC	CC	NN	CC	NN	CC	AA	CC	AA	AA	CC	CC	AA	CC	CC	CC	CC	NN	AA	NN	CC	CC	CC	CC	CC	CC	CC	CC	CC
AX-94834442	1B	10081858	T/C	CC	TT	CC	TT	CC	CC	CC	TT	TT	TT	TT	CC	TT	TT	TT	TT	CC	CC	CC	TT	TT	TT	CC	TT	CC	TT	TT	TT	CC	TT	TT	TT	CC	TT	TT	TT	TT	TT	TT	CC	CC	CC	TT	CC	TT	CC
AX-94960626	1B	10204634	A/G	AA	GG	AA	AA	AA	AA	AA	AA	GG	AA	GG	AA	GG	AA	AA	AA	AA	AA	AA	GG	AA	GG	AA	AA	AA	GG	GG	GG	AA	GG	AA	AA	AA	AA	GG	GG	GG	AA	AA	AA	AA	AA	GG	AA	AA	AA
AX-95253262	1B	10359607	G/C	GG	CC	GG	GG	GG	GG	GG	CC	CC	GG	CC	GG	CC	GG	CC	GG	GG	GG	GG	CC	CC	CC	GG	GG	GG	CC	CC	CC	GG	CC	CC	GG	GG	GG	CC	CC	CC	CC	GG	GG	GG	GG	CC	GG	CC	GG
AX-94926658	1B	11691927	A/G	AA	AA	AA	AA	AA	AA	AA	GG	AA	AA	AA	AA	AA	AA	GG	AA	AA	AA	AA	AA	AA	AA	AA	AA	AA	AA	AA	AA	AA	AA	GG	AA	AA	AA	AA	AA	AA	AA	AA	AA	AA	AA	AA	AA	GG	AA
AX-94728974	1B	12094677	C/G	GG	CC	CC	CC	CC	CC	CC	CC	GG	CC	CC	CC	CC	CC	CC	GG	CC	CC	GG	CC	CC	CC	CC	GG	CC	CC	GG	CC	GG	CC	CC	CC	CC	CC	CC	CC	CC	CC	CC	GG	CC	CC	CC	CC	CC	CC
AX-95119024	1B	12812130	T/C	TT	TT	TT	TT	TT	TT	TT	CC	TT	TT	TT	TT	TT	TT	CC	TT	TT	TT	TT	TT	CC	TT	TT	TT	TT	TT	TT	TT	TT	TT	CC	TT	TT	TT	TT	TT	TT	CC	TT	TT	TT	TT	TT	TT	CC	TT
AX-94400901	1B	13044139	G/A	GG	GG	AA	AA	AA	AA	AA	GG	GG	AA	GG	AA	GG	AA	GG	GG	AA	AA	GG	GG	GG	GG	AA	GG	AA	GG	GG	GG	GG	GG	GG	AA	AA	AA	GG	GG	GG	GG	AA	GG	AA	AA	GG	AA	GG	AA
AX-94715632	1B	13046637	G/A	AA	AA	GG	GG	GG	GG	GG	GG	AA	GG	AA	GG	AA	GG	GG	AA	GG	GG	AA	AA	GG	AA	GG	AA	GG	AA	AA	AA	AA	AA	GG	GG	GG	GG	AA	AA	AA	GG	GG	AA	GG	GG	AA	GG	GG	GG
AX-94609385	1B	14138799	G/A	GG	GG	AA	AA	AA	AA	AA	GG	GG	AA	GG	AA	GG	AA	GG	GG	AA	AA	GG	GG	GG	GG	AA	GG	AA	GG	GG	GG	GG	GG	GG	GG	AA	GG	GG	GG	GG	GG	AA	GG	AA	AA	GG	GG	GG	AA
AX-94759371	1B	14147728	C/G	CC	GG	CC	CC	CC	CC	CC	CC	CC	CC	GG	CC	GG	CC	CC	CC	CC	CC	CC	GG	CC	GG	CC	CC	CC	GG	CC	GG	CC	GG	CC	CC	CC	CC	GG	GG	GG	CC	CC	CC	CC	CC	GG	CC	CC	CC
AX-95202810	1B	14147738	C/T	TT	CC	CC	TT	CC	CC	CC	CC	TT	TT	CC	CC	CC	TT	CC	TT	CC	CC	TT	CC	CC	CC	CC	TT	CC	CC	TT	CC	TT	CC	CC	TT	CC	TT	CC	CC	CC	CC	TT	TT	CC	CC	CC	TT	CC	CC
AX-94381968	1B	14510662	T/C	CC	TT	TT	TT	TT	TT	TT	TT	CC	TT	CC	TT	TT	TT	TT	CC	TT	TT	CC	CC	TT	CC	TT	CC	TT	NN	CC	TT	CC	CC	TT	TT	TT	TT	CC	NN	CC	TT	TT	CC	TT	TT	TT	TT	TT	TT
AX-94602901	1B	15448393	C/T	TT	TT	CC	TT	CC	CC	CC	CC	TT	TT	TT	CC	TT	CC	CC	TT	CC	CC	TT	CC	CC	CC	CC	TT	CC	CC	TT	TT	TT	CC	CC	TT	CC	TT	CC	CC	CC	CC	TT	TT	CC	CC	TT	TT	CC	CC
AX-95135840	1B	15517213	G/T	GG	GG	TT	GG	TT	TT	TT	GG	GG	GG	GG	TT	GG	TT	GG	GG	TT	TT	GG	TT	GG	TT	TT	GG	TT	TT	GG	GG	GG	TT	GG	GG	TT	GG	TT	TT	TT	GG	GG	GG	TT	TT	GG	GG	GG	TT
AX-95094547	1B	16216618	T/C	TT	TT	TT	TT	TT	TT	TT	CC	CC	TT	TT	TT	TT	TT	CC	TT	TT	TT	TT	TT	CC	TT	TT	TT	TT	TT	CC	TT	TT	TT	CC	TT	TT	NN	TT	TT	TT	CC	TT	TT	TT	TT	TT	TT	CC	TT
AX-94990491	1B	16478917	C/G	GG	GG	CC	GG	CC	CC	CC	CC	CC	GG	GG	CC	GG	CC	CC	GG	CC	CC	GG	CC	CC	CC	CC	GG	CC	CC	CC	GG	GG	CC	CC	GG	CC	GG	CC	CC	CC	CC	GG	GG	CC	CC	GG	GG	CC	CC
AX-95250058	1B	16672204	A/G	AA	AA	AA	GG	AA	AA	AA	GG	AA	GG	AA	AA	AA	AA	GG	AA	AA	AA	AA	AA	GG	AA	AA	AA	AA	AA	AA	AA	AA	AA	GG	GG	AA	GG	AA	AA	AA	GG	GG	AA	AA	AA	AA	GG	GG	AA
AX-94778393	1B	16693658	G/A	GG	GG	AA	GG	AA	AA	AA	GG	GG	GG	GG	AA	GG	AA	GG	GG	AA	AA	GG	AA	GG	AA	AA	GG	AA	AA	GG	GG	GG	AA	GG	GG	AA	GG	AA	AA	AA	GG	GG	GG	AA	AA	GG	GG	GG	AA
AX-94823471	1B	17288338	A/G	AA	AA	AA	AA	AA	AA	AA	GG	GG	AA	AA	AA	AA	AA	GG	AA	AA	AA	AA	AA	GG	AA	AA	AA	AA	AA	GG	AA	GG	AA	GG	AA	AA	AA	AA	AA	NN	NN	AA	AA	AA	AA	AA	AA	GG	AA
AX-94769850	1B	17351914	T/C	TT	TT	CC	TT	CC	CC	CC	TT	TT	TT	TT	CC	TT	CC	TT	TT	CC	CC	TT	TT	TT	TT	CC	TT	CC	TT	TT	TT	TT	CC	TT	TT	CC	TT	TT	TT	TT	TT	TT	TT	CC	CC	TT	TT	TT	CC
AX-94387545	1B	17771184	T/C	TT	CC	TT	TT	TT	TT	TT	TT	TT	TT	CC	TT	CC	TT	TT	TT	TT	TT	TT	TT	TT	TT	TT	TT	TT	TT	TT	CC	TT	TT	TT	TT	TT	TT	TT	TT	TT	TT	TT	TT	TT	TT	CC	TT	TT	TT
AX-94866998	1B	18386608	T/C	CC	TT	CC	TT	CC	CC	CC	CC	TT	TT	TT	CC	TT	CC	CC	TT	CC	CC	TT	TT	CC	TT	CC	TT	CC	TT	TT	TT	TT	CC	CC	TT	CC	TT	TT	TT	TT	CC	TT	TT	CC	CC	TT	TT	CC	CC
AX-94736092	1B	18419600	T/C	TT	CC	TT	CC	TT	TT	TT	TT	CC	CC	CC	TT	CC	TT	TT	CC	TT	TT	CC	TT	TT	TT	TT	CC	TT	TT	CC	CC	CC	TT	TT	CC	TT	CC	TT	TT	TT	TT	CC	CC	TT	TT	CC	CC	TT	TT
AX-94815202	1B	18571527	C/A	CC	CC	CC	CC	CC	CC	CC	AA	AA	CC	CC	CC	CC	CC	AA	CC	CC	CC	CC	CC	AA	CC	CC	CC	CC	CC	AA	CC	CC	CC	AA	CC	CC	CC	CC	CC	CC	AA	CC	CC	CC	CC	CC	CC	AA	CC
AX-95255966	1B	18690094	G/A	GG	GG	GG	AA	AA	GG	AA	GG	AA	AA	NN	GG	GG	AA	GG	NN	GG	GG	GG	GG	AA	GG	GG	AA	AA	GG	AA	GG	GG	AA	AA	AA	GG	GG	GG	GG	GG	AA	AA	GG	GG	AA	GG	AA	AA	AA
AX-94545049	1B	18870277	C/T	CC	TT	CC	TT	CC	CC	CC	CC	TT	TT	TT	CC	TT	CC	CC	CC	CC	CC	CC	CC	CC	CC	CC	CC	CC	CC	TT	TT	CC	CC	CC	TT	CC	TT	CC	CC	CC	CC	TT	CC	CC	CC	TT	TT	CC	CC
AX-95161184	1B	20835867	C/G	GG	CC	CC	CC	CC	NN	CC	CC	CC	CC	CC	CC	CC	GG	CC	NN	GG	CC	CC	CC	CC	CC	GG	GG	GG	CC	CC	CC	CC	CC	CC	CC	GG	CC	CC	CC	CC	CC	CC	CC	GG	CC	CC	CC	CC	GG
AX-95077497	1B	22080328	C/T	CC	CC	CC	CC	CC	CC	CC	TT	CC	CC	CC	CC	CC	CC	TT	CC	CC	CC	CC	NN	CC	CC	CC	CC	CC	TT	CC	TT	CC	CC	NN	NN	CC	CC	CC	CC	CC	CC	NN	CC	CC	CC	CC	CC	CC	CC
AX-94959663	1B	22109341	A/G	AA	AA	AA	AA	AA	AA	AA	GG	AA	AA	AA	AA	AA	AA	GG	AA	AA	AA	AA	GG	GG	GG	AA	AA	AA	GG	AA	AA	AA	AA	GG	AA	AA	AA	GG	GG	GG	GG	AA	AA	AA	AA	AA	AA	GG	AA
AX-95181804	1B	22186467	C/A	CC	AA	CC	CC	CC	CC	CC	AA	CC	CC	CC	CC	AA	CC	AA	CC	CC	CC	CC	CC	AA	CC	CC	CC	CC	CC	CC	AA	CC	CC	AA	CC	CC	CC	CC	CC	CC	AA	CC	CC	CC	CC	AA	CC	AA	CC
AX-95019311	1B	22277928	C/T	TT	TT	CC	TT	CC	CC	CC	CC	TT	CC	CC	CC	TT	CC	CC	CC	CC	CC	TT	CC	CC	CC	CC	CC	CC	CC	TT	TT	CC	NN	CC	TT	CC	TT	CC	CC	CC	CC	TT	NN	TT	CC	TT	TT	CC	TT
AX-95095852	1B	22278506	G/T	TT	GG	GG	TT	GG	GG	GG	TT	TT	GG	GG	GG	GG	GG	TT	GG	GG	GG	TT	GG	TT	GG	GG	GG	GG	GG	TT	NN	GG	GG	TT	TT	GG	TT	GG	GG	GG	TT	TT	GG	TT	GG	GG	TT	TT	TT
AX-94950575	1B	22707102	G/C	CC	GG	GG	CC	GG	GG	CC	CC	CC	GG	GG	GG	NN	GG	CC	GG	GG	GG	CC	GG	CC	GG	GG	GG	GG	GG	CC	NN	CC	GG	CC	CC	GG	CC	GG	GG	GG	CC	CC	CC	CC	GG	GG	CC	CC	CC
AX-95002138	1B	24491683	T/C	TT	TT	TT	TT	TT	TT	TT	CC	TT	TT	TT	TT	TT	TT	CC	TT	TT	TT	TT	CC	CC	CC	TT	TT	TT	CC	TT	TT	TT	TT	CC	TT	TT	TT	CC	CC	CC	CC	TT	TT	TT	TT	TT	TT	CC	TT
AX-94613704	1B	25483334	A/G	GG	GG	GG	AA	AA	GG	AA	GG	AA	AA	AA	AA	GG	GG	GG	GG	GG	AA	GG	GG	GG	AA	AA	GG	GG	AA	AA	GG	AA	GG	AA	AA	AA	AA	AA	GG	GG	AA	AA	AA	GG	AA	GG	GG	GG	AA
AX-95258492	1B	26186107	C/T	CC	CC	TT	TT	TT	CC	TT	TT	TT	TT	CC	CC	CC	CC	TT	CC	CC	CC	CC	CC	TT	CC	CC	CC	CC	CC	TT	CC	CC	TT	TT	TT	CC	TT	CC	CC	CC	TT	TT	CC	CC	TT	CC	TT	TT	CC
AX-94951140	1B	28485412	C/T	CC	CC	CC	CC	CC	CC	CC	TT	CC	CC	CC	CC	CC	CC	TT	CC	CC	CC	CC	CC	TT	CC	CC	CC	CC	CC	CC	CC	CC	CC	TT	CC	CC	CC	CC	CC	CC	TT	CC	CC	CC	CC	CC	CC	TT	CC
AX-94473624	1B	28824074	G/T	GG	GG	TT	GG	TT	GG	TT	TT	GG	GG	GG	GG	GG	GG	TT	GG	GG	GG	GG	GG	TT	GG	GG	GG	GG	GG	GG	GG	GG	TT	TT	GG	GG	GG	GG	GG	GG	TT	GG	GG	GG	TT	GG	GG	TT	GG
AX-94445358	1B	31148143	C/A	CC	CC	AA	CC	AA	AA	AA	AA	CC	CC	CC	AA	CC	CC	AA	CC	CC	AA	CC	CC	AA	CC	CC	CC	CC	CC	CC	CC	CC	AA	AA	CC	AA	CC	CC	CC	CC	AA	CC	CC	AA	AA	CC	CC	AA	CC
AX-95219803	1B	32375620	T/G	TT	TT	GG	TT	GG	NN	GG	GG	TT	TT	TT	GG	TT	TT	GG	TT	TT	GG	TT	TT	GG	TT	TT	TT	TT	TT	TT	TT	TT	GG	GG	TT	GG	TT	TT	TT	TT	GG	TT	TT	GG	GG	TT	TT	GG	TT
AX-95202964	1B	32769179	A/G	AA	AA	AA	AA	AA	AA	AA	GG	AA	AA	AA	AA	AA	AA	GG	AA	AA	AA	AA	AA	GG	AA	AA	AA	AA	AA	AA	AA	AA	AA	GG	AA	AA	AA	AA	AA	AA	GG	AA	AA	AA	AA	AA	AA	GG	AA
AX-94484295	1B	32776165	A/G	AA	AA	GG	AA	GG	AA	GG	GG	AA	AA	AA	AA	AA	AA	GG	AA	AA	AA	AA	AA	GG	AA	AA	AA	AA	AA	AA	AA	AA	GG	GG	AA	AA	AA	AA	AA	AA	GG	AA	AA	AA	GG	AA	AA	GG	AA
AX-95196278	1B	38120874	A/G	AA	GG	AA	GG	AA	AA	AA	AA	GG	GG	AA	AA	GG	AA	AA	GG	AA	AA	AA	GG	AA	GG	AA	GG	AA	GG	GG	NN	GG	AA	AA	GG	AA	GG	GG	GG	GG	AA	GG	GG	AA	AA	GG	GG	AA	GG
AX-95011054	1B	39545395	C/T	TT	CC	TT	CC	TT	TT	TT	CC	CC	CC	TT	TT	CC	TT	CC	CC	TT	TT	TT	CC	CC	CC	TT	CC	TT	CC	NN	TT	CC	TT	CC	CC	TT	CC	CC	CC	CC	CC	CC	CC	TT	TT	CC	CC	CC	CC
AX-94425009	1B	41091716	A/G	AA	AA	GG	AA	GG	AA	GG	GG	AA	AA	AA	AA	AA	AA	GG	AA	AA	AA	AA	AA	GG	AA	AA	AA	AA	AA	AA	AA	AA	GG	GG	AA	AA	AA	AA	AA	AA	GG	AA	AA	AA	GG	AA	AA	GG	AA
AX-94804842	1B	47181579	C/T	CC	CC	CC	CC	CC	CC	CC	TT	CC	CC	CC	CC	CC	CC	TT	CC	CC	CC	CC	TT	TT	CC	CC	TT	CC	TT	CC	CC	CC	CC	TT	CC	CC	CC	TT	CC	CC	TT	CC	CC	CC	CC	CC	CC	TT	CC
AX-94725555	1B	49017378	G/C	CC	GG	CC	GG	CC	GG	CC	GG	GG	GG	GG	GG	GG	GG	CC	CC	GG	CC	CC	GG	CC	GG	GG	GG	GG	NN	GG	GG	GG	CC	CC	CC	GG	CC	GG	GG	GG	GG	CC	CC	GG	CC	GG	GG	CC	CC
AX-95196248	1B	49429948	C/A	CC	AA	CC	CC	CC	CC	CC	CC	CC	CC	CC	CC	AA	CC	CC	CC	CC	CC	CC	CC	CC	CC	CC	AA	CC	CC	CC	CC	CC	CC	CC	CC	CC	CC	CC	CC	CC	CC	CC	CC	CC	CC	AA	CC	CC	CC
AX-94473435	1B	49887469	G/A	GG	GG	GG	GG	GG	GG	GG	AA	GG	GG	GG	GG	GG	GG	AA	GG	GG	GG	GG	GG	AA	GG	GG	GG	GG	GG	GG	GG	GG	GG	AA	GG	GG	GG	GG	GG	GG	AA	GG	GG	GG	GG	GG	GG	AA	GG
AX-94413562	1B	52902043	T/C	TT	CC	CC	TT	CC	CC	CC	CC	CC	TT	TT	CC	CC	TT	CC	TT	TT	CC	TT	TT	CC	TT	CC	CC	TT	TT	CC	TT	TT	CC	CC	TT	CC	TT	TT	TT	TT	CC	TT	TT	CC	CC	CC	TT	CC	CC
AX-94883485	1B	56135077	A/C	AA	AA	AA	AA	AA	AA	AA	CC	AA	AA	AA	AA	AA	AA	CC	AA	AA	AA	AA	AA	CC	AA	AA	AA	AA	AA	AA	CC	AA	AA	CC	AA	AA	AA	AA	AA	AA	CC	AA	AA	AA	AA	AA	AA	CC	AA
AX-94648555	1B	57379382	A/G	AA	GG	GG	AA	GG	AA	GG	GG	AA	AA	AA	AA	GG	AA	GG	AA	AA	AA	AA	AA	GG	AA	AA	AA	AA	AA	AA	AA	AA	GG	GG	AA	AA	AA	AA	AA	AA	GG	AA	AA	AA	GG	GG	AA	GG	AA
AX-95068779	1B	57381487	C/T	CC	TT	TT	CC	TT	CC	TT	CC	CC	CC	CC	CC	TT	CC	CC	CC	CC	CC	CC	CC	CC	CC	CC	CC	CC	CC	CC	CC	CC	TT	CC	CC	CC	CC	CC	CC	CC	CC	CC	CC	CC	TT	TT	CC	CC	CC
AX-94626088	1B	58108589	C/T	CC	TT	CC	CC	CC	CC	CC	CC	CC	CC	CC	CC	TT	CC	CC	CC	CC	CC	CC	CC	CC	CC	CC	TT	CC	CC	CC	CC	CC	CC	CC	CC	CC	CC	CC	CC	CC	CC	CC	CC	CC	CC	TT	CC	CC	TT
AX-95152103	1B	59470412	T/C	TT	TT	CC	TT	CC	TT	CC	CC	TT	TT	TT	TT	TT	TT	CC	TT	TT	TT	TT	TT	CC	TT	TT	CC	TT	TT	TT	TT	TT	CC	CC	TT	TT	TT	TT	TT	TT	CC	TT	TT	TT	CC	TT	TT	CC	CC
AX-94835306	1B	59471177	T/C	TT	TT	CC	TT	CC	TT	CC	TT	TT	TT	TT	TT	TT	TT	TT	TT	TT	TT	TT	TT	TT	TT	TT	CC	TT	TT	NN	NN	TT	CC	TT	TT	TT	TT	TT	TT	TT	TT	TT	TT	TT	CC	TT	TT	TT	CC
AX-94408914	1B	59597817	G/A	AA	GG	AA	GG	AA	GG	AA	AA	GG	GG	AA	GG	GG	AA	AA	GG	AA	GG	AA	GG	AA	GG	GG	AA	GG	GG	GG	AA	GG	AA	AA	GG	GG	GG	GG	GG	GG	AA	GG	GG	GG	AA	GG	GG	AA	AA
AX-94629930	1B	59601326	G/T	TT	GG	GG	GG	GG	GG	GG	GG	GG	GG	TT	GG	GG	TT	GG	GG	TT	GG	TT	GG	GG	GG	GG	TT	GG	GG	GG	TT	GG	GG	GG	GG	GG	GG	GG	GG	GG	GG	GG	GG	GG	GG	GG	GG	GG	TT
AX-94990715	1B	60108419	A/G	GG	AA	GG	AA	GG	AA	GG	GG	AA	AA	GG	AA	AA	GG	GG	AA	GG	AA	GG	AA	GG	AA	AA	GG	AA	AA	AA	GG	AA	GG	GG	AA	AA	AA	AA	AA	AA	GG	AA	AA	AA	GG	AA	AA	GG	GG
AX-94997392	1B	65550747	G/A	GG	GG	GG	GG	GG	GG	GG	AA	GG	GG	GG	GG	GG	GG	AA	GG	GG	GG	GG	GG	AA	GG	GG	AA	GG	GG	GG	GG	GG	GG	AA	GG	GG	GG	GG	GG	GG	AA	GG	GG	GG	GG	GG	GG	AA	GG
AX-94522361	1B	68944824	T/G	TT	TT	TT	TT	TT	TT	TT	GG	TT	TT	TT	TT	TT	TT	GG	TT	TT	TT	TT	TT	GG	TT	TT	TT	TT	TT	NN	TT	TT	TT	GG	GG	TT	TT	TT	NN	TT	GG	TT	NN	TT	TT	TT	TT	GG	TT
AX-94434151	1B	70313571	G/A	GG	GG	GG	GG	GG	GG	GG	AA	GG	GG	GG	GG	GG	GG	AA	GG	GG	GG	GG	GG	AA	GG	GG	GG	GG	GG	GG	GG	GG	GG	AA	GG	GG	GG	GG	GG	GG	AA	GG	GG	GG	GG	GG	GG	AA	GG
AX-94528860	1B	77721071	A/G	AA	GG	AA	AA	AA	GG	AA	AA	AA	GG	AA	AA	GG	AA	AA	AA	GG	AA	AA	AA	AA	AA	AA	AA	AA	AA	AA	GG	AA	AA	AA	AA	GG	AA	AA	AA	AA	AA	AA	AA	GG	AA	AA	AA	AA	AA
AX-94661034	1B	80953905	A/G	GG	AA	AA	AA	AA	AA	AA	AA	AA	AA	GG	AA	AA	GG	AA	GG	GG	AA	GG	GG	AA	GG	AA	AA	GG	GG	AA	GG	GG	AA	AA	AA	AA	GG	GG	GG	GG	AA	AA	GG	AA	AA	AA	AA	AA	AA
AX-95195965	1B	84964874	G/A	GG	GG	GG	GG	AA	GG	GG	GG	GG	GG	AA	GG	GG	GG	AA	GG	AA	GG	GG	GG	AA	AA	GG	AA	GG	NN	GG	GG	GG	AA	AA	GG	GG	GG	GG	AA	GG	GG	GG	GG	GG	GG	GG	GG	AA	GG
AX-94915907	1B	86709699	A/G	AA	AA	AA	AA	GG	AA	GG	GG	AA	AA	AA	AA	AA	AA	GG	GG	AA	AA	AA	GG	GG	GG	AA	AA	GG	GG	AA	AA	GG	GG	GG	AA	AA	AA	GG	GG	GG	GG	AA	GG	AA	GG	AA	AA	GG	AA
AX-95146219	1B	86788216	G/C	CC	GG	GG	GG	GG	GG	GG	NN	CC	GG	CC	GG	GG	CC	CC	GG	CC	GG	CC	GG	CC	GG	CC	GG	GG	GG	CC	CC	GG	GG	CC	GG	GG	CC	GG	GG	GG	CC	GG	GG	GG	GG	GG	GG	CC	CC
AX-94681022	1B	86792709	T/C	TT	TT	TT	TT	NN	TT	NN	TT	TT	TT	TT	TT	TT	TT	TT	CC	TT	TT	TT	CC	TT	CC	TT	TT	CC	CC	TT	TT	CC	TT	TT	TT	TT	TT	CC	CC	CC	TT	TT	CC	TT	TT	TT	TT	TT	TT
AX-94758384	1B	90992623	T/C	TT	TT	TT	TT	TT	TT	TT	CC	TT	TT	TT	TT	TT	TT	CC	TT	TT	TT	TT	TT	CC	TT	TT	TT	TT	TT	TT	TT	TT	TT	CC	TT	TT	TT	TT	TT	TT	CC	TT	TT	TT	TT	TT	TT	CC	TT
AX-95093437	1B	94007228	C/G	CC	CC	CC	CC	GG	CC	GG	GG	CC	CC	CC	CC	CC	CC	GG	CC	CC	CC	CC	CC	GG	CC	CC	CC	CC	CC	CC	CC	CC	GG	GG	CC	CC	CC	CC	CC	CC	GG	CC	CC	CC	GG	CC	CC	GG	CC
AX-94592485	1B	94467479	G/A	GG	AA	GG	GG	GG	AA	GG	AA	GG	AA	GG	GG	AA	AA	GG	AA	GG	GG	AA	AA	GG	AA	GG	AA	GG	AA	GG	NN	GG	AA	GG	GG	GG	GG	AA	AA	AA	AA	AA	AA	GG	GG	AA	GG	GG	GG
AX-95631688	1B	94832171	A/G	AA	AA	AA	AA	AA	AA	AA	GG	AA	AA	AA	AA	AA	AA	GG	AA	AA	AA	AA	AA	GG	AA	AA	AA	AA	AA	AA	AA	AA	AA	GG	AA	AA	AA	AA	AA	AA	GG	AA	AA	AA	AA	AA	AA	GG	AA
AX-94672308	1B	94978941	G/A	GG	AA	GG	GG	GG	GG	GG	AA	GG	GG	GG	GG	AA	GG	AA	GG	GG	GG	GG	GG	AA	GG	GG	GG	GG	GG	GG	GG	GG	GG	AA	GG	GG	GG	GG	GG	GG	AA	GG	GG	GG	GG	AA	GG	AA	GG
AX-94440361	1B	98920627	G/T	TT	TT	GG	GG	GG	GG	GG	GG	GG	GG	TT	GG	TT	GG	GG	GG	TT	GG	TT	GG	GG	GG	GG	GG	GG	GG	GG	TT	GG	GG	GG	GG	GG	TT	GG	GG	GG	GG	GG	GG	GG	GG	TT	GG	GG	GG
AX-95162694	1B	100159281	C/T	CC	TT	CC	CC	CC	CC	CC	TT	CC	CC	CC	CC	TT	CC	TT	CC	CC	CC	CC	CC	TT	CC	CC	CC	CC	CC	CC	CC	CC	CC	TT	CC	CC	CC	CC	CC	CC	TT	CC	CC	CC	CC	TT	CC	TT	CC
AX-95258413	1B	101222264	C/T	CC	CC	CC	CC	CC	CC	CC	TT	CC	CC	CC	CC	CC	CC	TT	CC	CC	CC	CC	CC	TT	CC	CC	CC	CC	CC	CC	CC	CC	CC	TT	CC	CC	CC	CC	CC	CC	TT	CC	CC	CC	CC	CC	CC	TT	CC
AX-94823205	1B	106765081	T/C	TT	CC	TT	TT	TT	TT	TT	CC	TT	TT	TT	TT	CC	TT	CC	TT	TT	TT	TT	TT	CC	TT	TT	TT	TT	TT	TT	TT	TT	TT	CC	TT	TT	TT	TT	TT	TT	CC	TT	TT	TT	TT	CC	TT	CC	TT
AX-94579225	1B	112748718	C/T	CC	CC	CC	CC	CC	CC	CC	TT	CC	CC	CC	CC	CC	CC	TT	CC	CC	CC	CC	CC	TT	CC	CC	CC	CC	CC	CC	CC	CC	CC	TT	CC	CC	CC	CC	CC	CC	TT	CC	CC	CC	CC	CC	CC	TT	CC
AX-94621346	1B	118124416	T/C	TT	TT	CC	CC	TT	TT	TT	CC	TT	CC	TT	TT	TT	CC	CC	TT	TT	TT	TT	TT	CC	TT	TT	TT	TT	TT	TT	TT	TT	TT	CC	CC	TT	TT	TT	TT	TT	CC	CC	TT	TT	TT	TT	CC	CC	TT
AX-95225103	1B	118510714	C/T	CC	TT	CC	CC	CC	CC	CC	TT	CC	CC	CC	CC	TT	CC	TT	CC	CC	CC	CC	CC	TT	CC	CC	CC	CC	CC	CC	CC	CC	CC	TT	CC	CC	CC	CC	CC	CC	TT	CC	CC	CC	CC	TT	CC	TT	CC
AX-95120900	1B	119128222	T/C	TT	TT	TT	TT	TT	TT	TT	CC	TT	TT	TT	TT	TT	TT	CC	TT	TT	TT	TT	TT	CC	TT	TT	TT	TT	TT	TT	TT	TT	TT	CC	TT	TT	TT	TT	TT	TT	CC	TT	TT	TT	TT	TT	TT	CC	TT
AX-94479105	1B	120993235	C/G	CC	CC	CC	CC	CC	CC	CC	GG	CC	CC	CC	CC	CC	CC	GG	CC	CC	CC	CC	CC	GG	CC	CC	CC	CC	CC	CC	CC	CC	CC	GG	CC	CC	CC	CC	CC	CC	GG	CC	CC	CC	CC	CC	CC	GG	CC
AX-95096740	1B	121405551	T/C	TT	CC	TT	TT	TT	TT	TT	CC	CC	TT	TT	TT	CC	TT	CC	TT	TT	TT	TT	TT	CC	TT	TT	TT	TT	TT	CC	TT	TT	TT	CC	TT	TT	TT	TT	TT	TT	CC	TT	TT	TT	TT	CC	TT	CC	TT
AX-94923277	1B	121406297	C/T	CC	TT	CC	CC	CC	CC	CC	CC	TT	CC	CC	CC	TT	CC	CC	CC	CC	CC	CC	CC	CC	CC	CC	CC	CC	CC	TT	CC	CC	CC	CC	CC	CC	CC	CC	CC	CC	CC	CC	CC	CC	CC	TT	CC	CC	CC
AX-94445103	1B	123345619	G/A	GG	AA	GG	GG	GG	GG	GG	AA	GG	GG	GG	GG	AA	GG	AA	GG	GG	GG	GG	GG	AA	GG	GG	GG	GG	GG	GG	GG	GG	GG	AA	GG	GG	GG	GG	GG	GG	AA	GG	GG	GG	GG	AA	GG	AA	GG
AX-94767202	1B	130636818	T/G	TT	TT	TT	TT	TT	TT	TT	GG	TT	TT	TT	TT	TT	TT	GG	TT	TT	TT	TT	TT	GG	TT	TT	TT	TT	TT	TT	TT	TT	TT	GG	TT	TT	TT	TT	TT	TT	GG	TT	TT	TT	TT	TT	TT	GG	TT
AX-95120025	1B	135942260	A/G	AA	GG	AA	AA	AA	AA	AA	GG	AA	AA	AA	AA	GG	AA	GG	AA	AA	AA	AA	AA	GG	AA	AA	AA	AA	AA	AA	AA	AA	AA	GG	AA	AA	AA	AA	AA	AA	GG	AA	AA	AA	AA	GG	AA	GG	AA
AX-94781690	1B	137447371	A/C	AA	AA	AA	AA	AA	AA	AA	CC	AA	AA	AA	AA	AA	AA	CC	AA	AA	AA	AA	AA	CC	AA	AA	AA	AA	AA	AA	AA	AA	AA	CC	AA	AA	AA	AA	AA	AA	CC	AA	AA	AA	AA	AA	AA	CC	AA
AX-94806570	1B	139672173	T/C	TT	CC	TT	TT	TT	TT	TT	CC	TT	TT	TT	TT	CC	TT	CC	TT	TT	TT	TT	TT	CC	TT	TT	TT	TT	TT	TT	TT	TT	TT	CC	TT	TT	TT	TT	TT	TT	CC	TT	TT	TT	TT	CC	TT	CC	TT
AX-95208619	1B	145349889	G/A	GG	AA	AA	AA	GG	GG	GG	AA	AA	AA	GG	GG	AA	AA	AA	GG	GG	GG	GG	GG	AA	GG	GG	GG	GG	GG	AA	GG	GG	GG	AA	AA	GG	GG	GG	GG	GG	AA	AA	GG	GG	GG	AA	GG	AA	GG
AX-95194736	1B	146794385	G/A	GG	GG	GG	GG	AA	AA	AA	GG	GG	AA	GG	GG	GG	AA	GG	GG	GG	GG	GG	GG	GG	GG	GG	GG	GG	GG	GG	GG	GG	GG	GG	GG	AA	AA	GG	GG	AA	GG	AA	GG	AA	GG	GG	GG	GG	GG
AX-95629497	1B	148897282	A/G	AA	AA	GG	GG	AA	AA	AA	AA	GG	GG	AA	AA	AA	GG	AA	AA	AA	AA	AA	AA	AA	AA	AA	AA	AA	AA	GG	AA	AA	AA	AA	GG	AA	AA	AA	AA	AA	AA	GG	AA	AA	AA	AA	AA	AA	AA
AX-94437575	1B	150774683	T/C	TT	TT	TT	TT	TT	TT	TT	CC	TT	TT	TT	TT	TT	TT	CC	TT	TT	TT	TT	TT	CC	TT	TT	TT	TT	TT	TT	TT	TT	TT	CC	TT	TT	NN	TT	TT	TT	CC	TT	TT	TT	TT	TT	TT	CC	TT
AX-94578739	1B	151081249	C/A	CC	AA	CC	CC	CC	CC	CC	AA	CC	CC	CC	CC	AA	CC	AA	CC	CC	CC	CC	CC	AA	CC	CC	CC	CC	CC	CC	CC	CC	CC	AA	CC	CC	CC	CC	CC	CC	AA	CC	CC	CC	CC	AA	CC	AA	CC
AX-94781715	1B	151468076	G/A	GG	GG	GG	GG	GG	GG	GG	AA	GG	GG	GG	GG	GG	GG	AA	GG	GG	GG	GG	GG	AA	GG	GG	GG	GG	GG	GG	GG	GG	GG	AA	GG	GG	GG	GG	GG	GG	AA	GG	GG	GG	GG	GG	GG	AA	GG
AX-94978949	1B	157928479	A/C	AA	CC	AA	AA	AA	AA	AA	CC	AA	AA	AA	AA	CC	AA	CC	AA	AA	AA	AA	AA	CC	AA	AA	AA	AA	AA	AA	AA	AA	AA	CC	AA	AA	AA	AA	AA	AA	CC	AA	AA	AA	AA	CC	AA	CC	AA
AX-94612991	1B	158311719	T/C	TT	TT	TT	TT	TT	TT	TT	CC	TT	TT	TT	TT	TT	TT	CC	TT	TT	TT	TT	TT	CC	TT	TT	TT	TT	TT	NN	NN	TT	TT	CC	TT	TT	TT	TT	TT	TT	CC	TT	TT	TT	TT	TT	TT	CC	TT
AX-94917647	1B	163096556	G/A	GG	AA	GG	GG	GG	GG	GG	AA	GG	GG	GG	GG	AA	GG	AA	GG	GG	GG	GG	GG	AA	GG	GG	GG	GG	GG	GG	GG	GG	GG	AA	GG	GG	GG	GG	GG	GG	AA	GG	GG	GG	GG	AA	GG	AA	GG
AX-94942034	1B	167713656	T/C	TT	TT	TT	TT	TT	TT	TT	CC	TT	TT	TT	TT	TT	TT	CC	TT	TT	TT	TT	TT	CC	TT	TT	TT	TT	TT	NN	NN	TT	TT	CC	TT	TT	TT	TT	TT	TT	CC	TT	TT	TT	TT	TT	TT	CC	TT
AX-95009777	1B	169642314	C/T	CC	TT	CC	CC	CC	CC	CC	TT	CC	CC	CC	CC	TT	CC	TT	CC	CC	CC	CC	CC	TT	CC	CC	CC	CC	CC	CC	TT	CC	CC	TT	CC	CC	CC	CC	CC	CC	TT	CC	CC	CC	CC	TT	CC	TT	CC
AX-94535608	1B	172005285	C/T	CC	CC	TT	TT	TT	TT	TT	CC	TT	TT	CC	TT	CC	TT	CC	CC	CC	TT	CC	CC	CC	CC	CC	TT	CC	CC	TT	CC	CC	TT	CC	TT	TT	CC	CC	CC	CC	CC	TT	CC	TT	TT	CC	CC	CC	CC
AX-94818661	1B	172946764	A/G	AA	AA	AA	AA	AA	AA	AA	GG	AA	AA	AA	AA	AA	AA	GG	GG	AA	AA	AA	AA	GG	AA	AA	AA	AA	AA	AA	AA	AA	AA	GG	AA	AA	AA	AA	AA	AA	GG	AA	AA	AA	AA	AA	AA	GG	AA
AX-94666217	1B	173977020	A/G	AA	AA	AA	AA	GG	AA	AA	AA	AA	AA	GG	AA	AA	AA	AA	GG	AA	AA	AA	AA	AA	AA	GG	AA	AA	AA	AA	AA	GG	GG	AA	AA	AA	AA	AA	AA	GG	AA	AA	AA	AA	AA	AA	AA	AA	GG
AX-95250713	1B	177001118	G/A	GG	GG	GG	GG	GG	GG	GG	AA	GG	GG	GG	GG	GG	GG	AA	GG	GG	GG	GG	GG	AA	GG	GG	GG	GG	GG	GG	GG	GG	GG	AA	GG	GG	GG	GG	GG	GG	AA	GG	GG	GG	GG	GG	GG	AA	GG
AX-94738262	1B	183871259	C/T	CC	TT	CC	CC	CC	CC	CC	TT	CC	CC	CC	CC	TT	CC	TT	CC	CC	CC	CC	CC	TT	CC	CC	CC	CC	CC	CC	CC	CC	CC	TT	CC	CC	CC	CC	CC	CC	TT	CC	CC	CC	CC	TT	CC	TT	CC
AX-94851223	1B	187705574	A/G	AA	AA	AA	AA	AA	AA	AA	GG	AA	AA	AA	AA	AA	AA	GG	AA	AA	AA	AA	AA	GG	AA	AA	AA	AA	AA	AA	AA	AA	AA	GG	AA	AA	AA	AA	AA	AA	GG	AA	AA	AA	AA	AA	AA	GG	AA
AX-94766574	1B	188457467	T/C	TT	CC	TT	TT	TT	TT	TT	CC	TT	TT	TT	TT	CC	TT	CC	TT	TT	TT	TT	TT	CC	TT	TT	TT	TT	TT	TT	TT	TT	TT	CC	TT	TT	TT	TT	TT	TT	CC	TT	TT	TT	TT	CC	TT	CC	TT
AX-94466295	1B	197428536	A/G	NN	AA	AA	NN	AA	AA	AA	GG	AA	AA	AA	AA	AA	AA	GG	AA	AA	AA	AA	AA	GG	AA	AA	AA	AA	AA	AA	NN	AA	AA	GG	AA	AA	AA	AA	AA	AA	GG	AA	AA	AA	AA	AA	AA	GG	AA
AX-94819044	1B	209521654	A/G	AA	AA	AA	AA	AA	AA	AA	GG	AA	AA	AA	AA	AA	AA	GG	AA	AA	AA	AA	AA	GG	AA	AA	AA	AA	AA	AA	NN	AA	AA	GG	AA	AA	AA	AA	AA	AA	GG	AA	AA	AA	AA	AA	AA	GG	AA
AX-94583180	1B	213911344	A/G	AA	GG	AA	AA	AA	AA	AA	GG	AA	AA	AA	AA	GG	AA	GG	AA	AA	AA	AA	AA	GG	AA	AA	AA	AA	AA	AA	AA	AA	AA	GG	AA	AA	AA	AA	AA	AA	GG	AA	AA	AA	AA	GG	AA	GG	AA
AX-94495092	1B	223799117	G/A	GG	GG	GG	GG	GG	GG	GG	AA	GG	GG	GG	GG	GG	GG	AA	GG	GG	GG	GG	GG	AA	GG	GG	GG	GG	GG	GG	NN	GG	GG	AA	GG	GG	GG	GG	GG	GG	AA	GG	GG	GG	GG	GG	GG	AA	GG
AX-95108394	1B	227791971	C/T	CC	TT	CC	CC	CC	TT	CC	TT	CC	TT	CC	CC	TT	TT	CC	CC	CC	TT	CC	TT	CC	TT	TT	CC	CC	CC	CC	CC	CC	CC	CC	CC	CC	CC	TT	CC	TT	CC	CC	CC	CC	TT	TT	TT	CC	CC
AX-94576582	1B	240501057	T/G	TT	TT	TT	TT	GG	GG	GG	GG	TT	TT	TT	GG	TT	TT	GG	TT	TT	GG	TT	TT	GG	TT	TT	GG	TT	TT	TT	TT	TT	GG	GG	TT	GG	TT	TT	TT	TT	GG	TT	TT	GG	GG	TT	TT	GG	TT
AX-95653064	1B	242667968	G/A	GG	GG	GG	GG	GG	GG	GG	GG	GG	GG	GG	GG	GG	GG	GG	AA	GG	GG	GG	AA	GG	AA	GG	GG	AA	AA	GG	GG	AA	GG	GG	GG	GG	GG	AA	AA	AA	GG	GG	AA	GG	GG	GG	AA	GG	AA
AX-94555065	1B	280712133	G/C	GG	CC	GG	GG	CC	CC	CC	CC	GG	GG	GG	CC	CC	GG	CC	GG	GG	CC	GG	GG	CC	GG	CC	GG	GG	GG	GG	GG	GG	CC	CC	GG	CC	GG	GG	GG	GG	CC	GG	GG	CC	CC	CC	GG	CC	GG
AX-94411778	1B	282051678	A/G	AA	AA	AA	AA	GG	GG	GG	GG	AA	AA	AA	GG	AA	AA	GG	AA	AA	GG	AA	AA	GG	NN	GG	AA	AA	AA	AA	AA	AA	GG	GG	AA	GG	AA	AA	AA	AA	AA	AA	AA	GG	GG	AA	AA	GG	AA
AX-94985514	1B	289728166	T/C	TT	TT	TT	TT	TT	TT	TT	CC	CC	TT	TT	TT	TT	TT	CC	CC	TT	TT	TT	TT	CC	TT	TT	TT	TT	TT	CC	TT	CC	TT	CC	TT	TT	TT	TT	TT	TT	CC	TT	CC	TT	TT	TT	TT	CC	TT
AX-94451934	1B	295088685	A/G	AA	GG	AA	AA	AA	AA	AA	AA	AA	AA	AA	AA	GG	AA	AA	AA	AA	AA	AA	AA	AA	AA	AA	AA	AA	AA	AA	GG	AA	AA	AA	AA	AA	AA	AA	AA	AA	AA	AA	AA	AA	AA	GG	AA	AA	AA
AX-94847672	1B	297299654	A/C	CC	AA	CC	AA	CC	CC	CC	CC	AA	AA	AA	CC	AA	CC	CC	AA	CC	CC	AA	AA	NN	AA	CC	AA	CC	AA	AA	AA	AA	CC	CC	AA	CC	AA	AA	AA	AA	CC	AA	AA	CC	CC	AA	AA	CC	CC
AX-94546751	1B	297864163	T/C	TT	TT	TT	TT	TT	TT	TT	TT	TT	TT	TT	CC	TT	TT	TT	TT	CC	TT	CC	TT	TT	CC	TT	TT	TT	TT	TT	TT	CC	TT	TT	TT	CC	TT	TT	CC	TT	TT	TT	TT	CC	TT	TT	CC	TT	TT
AX-95143224	1B	321240200	A/G	AA	AA	AA	AA	AA	AA	AA	GG	AA	AA	AA	AA	AA	AA	GG	GG	AA	AA	AA	AA	GG	AA	AA	AA	AA	AA	AA	AA	AA	AA	GG	AA	AA	AA	AA	AA	AA	GG	AA	AA	AA	AA	AA	AA	GG	AA
AX-94919611	1B	321241490	T/C	TT	TT	TT	TT	TT	TT	TT	CC	TT	TT	TT	TT	TT	TT	CC	CC	TT	TT	TT	TT	CC	TT	TT	TT	TT	TT	TT	TT	TT	TT	CC	TT	TT	TT	TT	TT	TT	CC	TT	TT	TT	TT	TT	TT	CC	TT
AX-94626021	1B	321252250	C/T	TT	CC	TT	TT	TT	CC	TT	CC	CC	TT	TT	CC	CC	TT	CC	CC	TT	TT	CC	TT	TT	TT	CC	TT	CC	CC	CC	TT	TT	TT	TT	TT	CC	TT	TT	CC	CC	CC	TT	CC	TT	TT	CC	TT	CC	TT
AX-95019364	1B	321683211	A/T	AA	AA	AA	AA	AA	AA	AA	AA	AA	AA	TT	TT	AA	AA	AA	TT	AA	AA	AA	TT	AA	TT	AA	TT	AA	AA	TT	AA	TT	AA	AA	AA	AA	AA	TT	AA	AA	AA	AA	AA	AA	AA	AA	AA	AA	AA
AX-94699507	1B	321704588	A/G	AA	GG	AA	AA	AA	AA	AA	GG	AA	AA	AA	AA	GG	AA	GG	AA	AA	AA	AA	AA	GG	AA	AA	AA	AA	AA	AA	AA	AA	AA	GG	AA	AA	AA	AA	AA	AA	GG	AA	AA	AA	AA	GG	AA	GG	AA
AX-94730403	1B	328938869	C/T	CC	TT	CC	CC	CC	CC	CC	CC	TT	CC	CC	CC	TT	CC	CC	CC	CC	CC	CC	CC	CC	CC	TT	CC	CC	CC	TT	CC	CC	CC	CC	CC	CC	CC	CC	CC	CC	CC	CC	CC	CC	CC	TT	CC	CC	CC
AX-94837249	1B	329943521	G/T	GG	GG	GG	GG	GG	GG	GG	GG	TT	GG	GG	GG	GG	GG	GG	GG	GG	GG	GG	GG	GG	GG	TT	GG	GG	GG	TT	NN	GG	GG	GG	GG	GG	GG	GG	GG	GG	GG	GG	GG	GG	GG	GG	GG	GG	GG
AX-94863697	1B	332754819	A/G	AA	AA	AA	AA	AA	AA	AA	AA	AA	AA	AA	AA	AA	AA	AA	AA	AA	AA	AA	AA	GG	AA	AA	AA	AA	AA	AA	AA	AA	AA	GG	AA	AA	AA	AA	AA	AA	GG	AA	AA	AA	GG	AA	AA	AA	AA
AX-94962832	1B	336070173	T/G	TT	GG	TT	TT	TT	TT	TT	TT	GG	TT	TT	TT	GG	TT	TT	TT	TT	TT	TT	TT	TT	TT	GG	TT	TT	TT	GG	TT	TT	TT	TT	TT	TT	TT	TT	TT	TT	TT	TT	TT	TT	TT	GG	TT	TT	TT
AX-94522784	1B	348416217	G/A	GG	AA	GG	GG	GG	GG	GG	GG	GG	GG	GG	GG	AA	GG	GG	GG	GG	GG	GG	GG	GG	GG	AA	GG	GG	GG	GG	NN	GG	GG	GG	GG	GG	GG	GG	GG	GG	GG	GG	GG	GG	GG	AA	GG	GG	GG
AX-95167728	1B	350660220	G/A	GG	GG	GG	GG	GG	AA	GG	AA	GG	AA	GG	GG	GG	GG	GG	GG	GG	GG	AA	GG	GG	GG	GG	GG	GG	GG	GG	GG	GG	GG	GG	GG	AA	GG	GG	GG	GG	GG	GG	GG	GG	GG	GG	GG	GG	AA
AX-95121030	1B	377097300	C/T	CC	CC	CC	CC	CC	CC	CC	CC	CC	CC	CC	CC	TT	CC	CC	CC	CC	CC	CC	TT	CC	TT	CC	TT	CC	CC	CC	CC	CC	CC	CC	CC	CC	CC	TT	CC	TT	CC	CC	CC	CC	CC	CC	TT	CC	CC
AX-95110974	1B	388382595	T/C	TT	TT	TT	TT	TT	TT	TT	CC	CC	TT	TT	TT	TT	TT	CC	CC	TT	TT	TT	TT	CC	TT	TT	TT	TT	TT	CC	TT	CC	TT	CC	TT	TT	TT	TT	TT	TT	CC	TT	CC	TT	TT	TT	TT	CC	TT
AX-95127635	1B	389224631	T/C	TT	TT	CC	TT	CC	TT	CC	CC	TT	TT	TT	TT	TT	TT	CC	TT	TT	TT	TT	TT	CC	TT	TT	TT	TT	TT	TT	TT	TT	CC	CC	TT	TT	TT	TT	TT	TT	CC	TT	TT	TT	CC	TT	TT	CC	TT
AX-94424092	1B	391573645	G/A	AA	GG	GG	GG	GG	GG	GG	AA	GG	GG	AA	GG	GG	GG	AA	GG	AA	GG	AA	GG	GG	GG	AA	GG	GG	GG	GG	AA	GG	GG	GG	GG	GG	AA	GG	GG	GG	GG	GG	GG	GG	GG	GG	GG	GG	GG
AX-94418050	1B	420226320	T/C	TT	TT	TT	TT	TT	TT	TT	CC	TT	TT	TT	TT	TT	TT	CC	TT	TT	TT	TT	TT	CC	TT	TT	TT	TT	TT	TT	TT	TT	TT	CC	TT	TT	TT	TT	TT	TT	CC	TT	TT	TT	TT	TT	TT	CC	TT
AX-94810323	1B	429765423	G/T	GG	GG	GG	TT	GG	GG	GG	GG	GG	GG	GG	GG	GG	GG	GG	TT	GG	TT	GG	TT	GG	TT	GG	TT	TT	TT	GG	GG	TT	GG	GG	TT	GG	GG	TT	TT	TT	GG	TT	TT	GG	GG	GG	TT	GG	TT
AX-94881376	1B	444781808	A/C	AA	CC	CC	CC	AA	AA	AA	AA	AA	CC	AA	AA	CC	CC	CC	AA	AA	AA	AA	AA	AA	AA	CC	AA	AA	AA	AA	AA	AA	AA	AA	CC	AA	AA	AA	AA	AA	AA	CC	AA	AA	AA	CC	AA	AA	AA
AX-94388408	1B	444787257	T/C	TT	CC	CC	CC	TT	TT	TT	TT	TT	CC	TT	TT	CC	CC	TT	TT	TT	TT	TT	TT	TT	TT	TT	TT	TT	TT	TT	TT	TT	TT	TT	CC	TT	TT	TT	TT	TT	TT	CC	TT	TT	TT	CC	TT	TT	TT
AX-94534282	1B	447165501	A/G	AA	GG	GG	GG	AA	AA	AA	AA	AA	GG	AA	AA	GG	GG	AA	AA	AA	AA	AA	AA	AA	AA	AA	AA	AA	AA	AA	AA	AA	AA	AA	GG	AA	AA	AA	AA	AA	AA	GG	AA	AA	AA	GG	AA	AA	AA
AX-95108556	1B	447325833	A/C	AA	AA	AA	AA	AA	AA	AA	AA	AA	AA	AA	AA	AA	AA	CC	AA	AA	AA	AA	AA	AA	AA	AA	AA	AA	AA	AA	AA	AA	AA	AA	AA	AA	AA	AA	AA	AA	AA	AA	AA	AA	AA	AA	AA	AA	AA
AX-94494615	1B	448141315	A/G	AA	GG	GG	GG	AA	AA	AA	AA	AA	GG	AA	AA	GG	GG	GG	AA	AA	AA	AA	AA	AA	AA	AA	AA	AA	AA	AA	NN	AA	AA	AA	GG	AA	AA	AA	AA	AA	AA	GG	AA	AA	AA	GG	AA	AA	AA
AX-94953642	1B	454362551	T/C	TT	TT	TT	TT	TT	TT	TT	TT	TT	TT	TT	TT	TT	TT	TT	TT	TT	TT	TT	TT	TT	TT	TT	TT	TT	TT	CC	CC	CC	NN	NN	CC	TT	NN	CC	CC	TT	TT	TT	TT	TT	NN	TT	TT	TT	TT
AX-95140632	1B	470000710	T/C	TT	CC	TT	TT	TT	TT	TT	TT	CC	TT	TT	TT	CC	TT	TT	TT	TT	TT	TT	TT	TT	TT	CC	TT	TT	TT	CC	TT	TT	TT	TT	TT	TT	TT	TT	TT	TT	TT	TT	TT	TT	TT	CC	TT	TT	TT
AX-95122285	1B	474446686	C/T	TT	CC	CC	CC	CC	CC	CC	TT	CC	CC	TT	CC	CC	CC	CC	CC	TT	CC	TT	CC	CC	CC	CC	CC	CC	CC	CC	TT	CC	CC	CC	CC	CC	TT	CC	CC	CC	CC	CC	CC	CC	CC	CC	CC	CC	CC
AX-94929285	1B	474447981	C/T	TT	CC	CC	CC	CC	CC	CC	TT	NN	CC	TT	CC	CC	CC	CC	CC	TT	CC	TT	CC	CC	CC	CC	CC	CC	CC	TT	TT	CC	CC	CC	CC	CC	TT	CC	CC	CC	CC	CC	CC	CC	CC	CC	CC	CC	CC
AX-94634515	1B	483290519	G/A	GG	GG	GG	GG	GG	GG	GG	GG	AA	GG	GG	GG	GG	GG	AA	GG	GG	GG	GG	GG	GG	GG	GG	GG	GG	GG	AA	GG	GG	GG	GG	GG	GG	GG	GG	GG	GG	GG	GG	GG	GG	GG	GG	GG	GG	GG
AX-95179446	1B	487680640	T/G	TT	GG	TT	TT	TT	TT	TT	TT	GG	TT	TT	TT	GG	TT	GG	TT	TT	TT	TT	TT	TT	TT	TT	TT	TT	TT	GG	TT	TT	TT	TT	TT	TT	TT	TT	TT	TT	TT	TT	TT	TT	TT	GG	TT	TT	TT
AX-95021131	1B	488127748	A/G	AA	AA	AA	GG	AA	AA	AA	AA	AA	AA	AA	AA	AA	AA	AA	AA	AA	AA	AA	AA	AA	AA	AA	AA	AA	AA	AA	AA	AA	AA	AA	AA	AA	AA	AA	AA	AA	AA	AA	AA	GG	AA	AA	GG	AA	AA
AX-95136941	1B	488658884	T/C	CC	CC	CC	TT	TT	TT	TT	CC	CC	TT	CC	TT	CC	TT	TT	TT	CC	TT	CC	TT	TT	TT	TT	TT	TT	TT	CC	CC	TT	TT	TT	TT	TT	CC	TT	TT	TT	TT	TT	TT	TT	TT	CC	TT	TT	TT
AX-94633266	1B	489249553	T/G	TT	GG	TT	TT	TT	TT	TT	TT	GG	TT	TT	TT	GG	TT	TT	TT	TT	TT	TT	TT	TT	TT	TT	TT	TT	TT	GG	TT	TT	TT	TT	TT	TT	TT	TT	TT	TT	TT	TT	TT	TT	TT	GG	TT	TT	TT
AX-94476532	1B	503665390	T/C	CC	CC	CC	TT	TT	TT	TT	CC	TT	TT	TT	TT	CC	CC	TT	TT	CC	TT	TT	TT	TT	TT	TT	TT	TT	TT	TT	CC	TT	TT	TT	TT	TT	CC	TT	TT	TT	TT	TT	TT	TT	TT	CC	TT	TT	CC
AX-94796715	1B	510980806	C/T	TT	TT	TT	TT	CC	CC	CC	TT	CC	TT	TT	CC	TT	TT	CC	CC	TT	CC	TT	CC	CC	CC	TT	CC	CC	CC	CC	TT	CC	CC	CC	TT	CC	TT	CC	CC	CC	CC	TT	CC	CC	CC	TT	CC	CC	CC
AX-95016210	1B	511973843	T/C	TT	TT	TT	TT	TT	TT	TT	CC	TT	TT	TT	TT	TT	TT	CC	TT	TT	TT	TT	TT	CC	TT	TT	TT	TT	TT	TT	TT	TT	TT	CC	TT	TT	TT	TT	TT	TT	CC	TT	TT	TT	TT	TT	TT	CC	TT
AX-94918877	1B	512422210	G/C	CC	CC	CC	CC	GG	GG	GG	CC	GG	CC	CC	GG	CC	CC	GG	GG	CC	GG	CC	GG	GG	GG	CC	GG	GG	GG	GG	CC	GG	GG	GG	CC	GG	CC	GG	GG	GG	GG	CC	GG	GG	GG	CC	GG	GG	GG
AX-94508476	1B	515361176	A/G	AA	GG	AA	AA	GG	GG	GG	AA	AA	AA	AA	GG	GG	AA	AA	AA	AA	AA	AA	AA	GG	AA	AA	AA	AA	AA	AA	AA	AA	GG	AA	AA	GG	AA	AA	AA	AA	GG	AA	GG	GG	GG	GG	AA	AA	AA
AX-94481774	1B	515450601	G/A	GG	GG	GG	GG	AA	AA	AA	GG	GG	GG	GG	AA	GG	GG	GG	GG	GG	GG	GG	GG	AA	GG	GG	GG	GG	GG	GG	GG	GG	AA	GG	GG	AA	GG	GG	GG	GG	AA	GG	AA	AA	AA	GG	GG	GG	GG
AX-94490210	1B	527001674	A/G	AA	AA	AA	AA	AA	AA	AA	AA	AA	AA	AA	AA	AA	AA	GG	AA	AA	GG	AA	AA	AA	AA	AA	AA	GG	AA	AA	AA	GG	AA	GG	AA	AA	AA	AA	AA	AA	AA	AA	AA	AA	AA	AA	AA	GG	AA
AX-94504071	1B	527835078	T/A	TT	AA	TT	TT	TT	TT	TT	TT	TT	TT	TT	TT	AA	TT	AA	TT	TT	AA	TT	TT	TT	NN	TT	TT	AA	TT	TT	TT	AA	TT	AA	TT	TT	TT	TT	TT	TT	TT	TT	TT	TT	TT	AA	TT	AA	TT
AX-94864530	1B	529855091	C/T	TT	CC	TT	CC	CC	CC	CC	TT	CC	CC	CC	CC	CC	CC	CC	CC	TT	TT	TT	CC	CC	CC	CC	CC	CC	CC	CC	TT	CC	CC	CC	CC	CC	TT	CC	CC	CC	CC	CC	CC	CC	CC	CC	CC	CC	CC
AX-95652713	1B	530061188	A/G	GG	GG	GG	AA	AA	AA	AA	GG	AA	AA	AA	AA	GG	AA	GG	AA	GG	GG	GG	AA	AA	AA	AA	AA	GG	AA	AA	GG	GG	AA	GG	AA	AA	GG	AA	AA	AA	AA	AA	AA	AA	AA	GG	AA	GG	AA
AX-95633124	1B	530478419	A/G	GG	GG	GG	AA	AA	AA	AA	GG	AA	AA	AA	AA	GG	AA	GG	GG	GG	GG	GG	AA	AA	AA	AA	GG	GG	AA	AA	GG	GG	AA	GG	AA	AA	GG	AA	AA	AA	AA	AA	AA	AA	AA	GG	AA	GG	AA
AX-94934000	1B	530959440	A/G	GG	AA	GG	AA	AA	AA	AA	GG	AA	AA	AA	AA	AA	AA	GG	GG	GG	GG	GG	AA	AA	AA	AA	GG	GG	AA	AA	GG	GG	AA	GG	AA	AA	GG	AA	AA	AA	AA	AA	AA	AA	AA	AA	AA	GG	AA
AX-95257184	1B	531166669	G/C	CC	CC	CC	GG	GG	GG	GG	CC	GG	GG	GG	GG	CC	GG	GG	GG	CC	CC	CC	GG	GG	GG	GG	GG	GG	GG	GG	CC	GG	GG	GG	GG	GG	CC	GG	GG	GG	GG	GG	GG	GG	GG	CC	GG	GG	GG
AX-94426987	1B	533404196	C/T	CC	CC	CC	CC	CC	CC	CC	TT	CC	CC	CC	CC	CC	CC	TT	CC	CC	CC	CC	CC	TT	CC	CC	CC	CC	CC	CC	CC	CC	CC	TT	CC	CC	CC	CC	CC	CC	TT	CC	CC	CC	CC	CC	CC	TT	CC
AX-94584338	1B	535690392	C/T	CC	CC	CC	CC	CC	CC	CC	CC	CC	CC	TT	CC	CC	CC	CC	TT	CC	CC	CC	TT	CC	TT	CC	TT	CC	TT	CC	CC	CC	CC	CC	CC	CC	CC	TT	TT	TT	CC	CC	CC	CC	CC	CC	TT	CC	CC
AX-95182909	1B	538865519	C/A	AA	CC	AA	CC	CC	CC	CC	AA	CC	CC	CC	CC	CC	CC	CC	CC	AA	AA	AA	CC	CC	CC	CC	CC	CC	CC	CC	AA	CC	CC	CC	CC	CC	AA	CC	CC	CC	CC	CC	CC	CC	CC	CC	CC	CC	CC
AX-94462466	1B	539449027	A/G	AA	AA	AA	GG	GG	AA	GG	AA	GG	GG	AA	AA	AA	GG	GG	AA	AA	AA	AA	AA	GG	AA	AA	AA	GG	AA	GG	AA	GG	GG	GG	GG	AA	AA	AA	AA	AA	GG	GG	GG	AA	GG	AA	AA	GG	GG
AX-94667633	1B	539567989	T/G	GG	GG	GG	TT	TT	GG	TT	GG	TT	TT	TT	GG	GG	TT	GG	TT	GG	GG	GG	TT	TT	TT	GG	TT	TT	TT	TT	GG	TT	TT	TT	TT	GG	GG	TT	TT	TT	TT	TT	TT	GG	TT	GG	TT	TT	TT
AX-95077232	1B	540726775	C/T	TT	TT	TT	CC	CC	TT	CC	TT	CC	CC	CC	TT	TT	CC	TT	CC	TT	TT	TT	CC	CC	CC	TT	CC	CC	NN	NN	TT	CC	CC	CC	NN	TT	TT	CC	CC	CC	CC	CC	CC	TT	CC	TT	CC	CC	CC
AX-94495814	1B	540847939	C/T	CC	CC	CC	TT	TT	CC	TT	CC	TT	CC	TT	CC	CC	CC	CC	TT	CC	CC	CC	TT	TT	CC	CC	TT	TT	TT	TT	CC	CC	TT	CC	TT	CC	CC	TT	CC	TT	TT	TT	TT	CC	TT	CC	CC	TT	TT
AX-94507852	1B	543085932	T/C	CC	CC	CC	TT	TT	CC	TT	CC	TT	TT	TT	CC	CC	CC	CC	TT	CC	CC	TT	TT	TT	TT	CC	TT	TT	TT	TT	CC	TT	TT	TT	TT	CC	CC	TT	TT	TT	TT	TT	TT	TT	TT	CC	TT	TT	TT
AX-95145762	1B	543473942	G/A	GG	GG	GG	GG	GG	AA	GG	GG	GG	GG	GG	AA	GG	GG	AA	GG	GG	GG	GG	GG	GG	GG	AA	GG	GG	GG	NN	GG	GG	GG	GG	GG	AA	GG	GG	GG	GG	GG	GG	GG	GG	GG	GG	GG	GG	GG
AX-95165363	1B	543740356	A/G	GG	AA	GG	AA	AA	GG	AA	GG	AA	AA	AA	AA	AA	GG	AA	AA	GG	GG	AA	AA	AA	AA	AA	AA	AA	AA	AA	GG	AA	AA	AA	AA	AA	GG	AA	AA	AA	AA	AA	AA	AA	AA	AA	AA	AA	AA
AX-95095538	1B	544811316	A/G	AA	AA	AA	AA	GG	AA	GG	AA	AA	AA	GG	AA	AA	AA	AA	GG	AA	AA	AA	GG	AA	GG	AA	GG	AA	AA	AA	NN	AA	GG	AA	AA	AA	AA	GG	GG	GG	AA	AA	AA	AA	GG	AA	GG	AA	AA
AX-94485445	1B	545644629	A/G	AA	GG	AA	AA	AA	AA	AA	AA	AA	AA	AA	GG	GG	AA	GG	AA	AA	AA	AA	AA	AA	AA	GG	AA	AA	GG	AA	NN	AA	AA	AA	AA	GG	AA	AA	AA	AA	AA	AA	AA	AA	AA	GG	AA	AA	AA
AX-94958010	1B	548536119	G/T	TT	GG	TT	GG	GG	TT	GG	TT	GG	GG	GG	GG	GG	TT	GG	GG	TT	TT	GG	GG	GG	GG	GG	GG	GG	GG	GG	TT	GG	GG	GG	GG	GG	TT	GG	GG	GG	GG	GG	GG	GG	GG	GG	GG	GG	GG
AX-95125372	1B	548625102	C/G	GG	CC	GG	CC	GG	GG	GG	GG	CC	CC	CC	CC	CC	GG	CC	CC	GG	GG	CC	CC	CC	CC	CC	CC	CC	CC	CC	GG	CC	GG	CC	CC	CC	GG	CC	CC	CC	CC	CC	CC	CC	GG	CC	CC	CC	CC
AX-94510167	1B	548674725	G/C	GG	CC	GG	GG	GG	GG	GG	GG	GG	GG	GG	CC	CC	GG	CC	GG	GG	GG	CC	GG	GG	GG	CC	GG	CC	CC	GG	GG	CC	GG	GG	GG	CC	GG	GG	GG	GG	GG	GG	GG	GG	GG	CC	GG	CC	CC
AX-95129168	1B	548892283	G/A	GG	GG	GG	AA	GG	GG	GG	GG	AA	AA	AA	GG	GG	GG	GG	AA	GG	GG	GG	AA	AA	AA	GG	AA	GG	GG	AA	GG	GG	GG	AA	AA	GG	GG	AA	AA	AA	AA	AA	AA	AA	GG	GG	AA	GG	GG
AX-95685183	1B	548975787	G/A	GG	GG	GG	GG	GG	GG	GG	GG	GG	GG	GG	AA	GG	GG	AA	GG	GG	GG	GG	GG	GG	GG	AA	GG	GG	AA	GG	GG	GG	GG	GG	GG	AA	GG	GG	GG	GG	GG	GG	GG	GG	GG	GG	GG	GG	GG
AX-94395353	1B	549456879	C/A	AA	CC	AA	CC	AA	AA	AA	AA	CC	CC	CC	AA	CC	AA	AA	CC	AA	AA	CC	CC	CC	CC	AA	CC	CC	AA	CC	AA	CC	AA	CC	CC	AA	AA	CC	CC	CC	CC	CC	CC	CC	AA	CC	CC	CC	CC
AX-94682892	1B	551009872	C/T	TT	CC	TT	CC	CC	TT	CC	TT	CC	CC	CC	CC	CC	TT	CC	CC	TT	TT	TT	CC	TT	CC	CC	CC	TT	CC	CC	TT	TT	CC	TT	CC	CC	TT	CC	CC	CC	TT	CC	TT	CC	CC	CC	CC	TT	TT
AX-94808850	1B	551032400	A/G	AA	AA	AA	GG	AA	AA	AA	AA	GG	GG	GG	AA	AA	AA	AA	GG	AA	AA	AA	GG	AA	GG	AA	GG	AA	AA	GG	AA	AA	AA	AA	NN	AA	AA	GG	GG	GG	AA	AA	AA	AA	AA	AA	GG	AA	AA
AX-94579198	1B	551177487	C/T	CC	TT	CC	CC	CC	CC	CC	CC	CC	CC	CC	TT	TT	CC	TT	CC	CC	CC	CC	CC	CC	CC	TT	CC	CC	TT	CC	CC	CC	CC	CC	CC	TT	CC	CC	CC	CC	CC	CC	CC	CC	CC	TT	CC	CC	CC
AX-94468186	1B	551221604	A/C	AA	AA	AA	AA	CC	AA	CC	AA	AA	AA	AA	AA	NN	AA	AA	AA	AA	AA	CC	AA	CC	AA	AA	AA	CC	AA	AA	AA	CC	CC	CC	AA	AA	AA	AA	AA	AA	CC	AA	CC	AA	CC	AA	AA	CC	CC
AX-95122579	1B	551864147	C/G	GG	CC	GG	GG	CC	GG	CC	GG	GG	GG	GG	CC	CC	GG	CC	GG	GG	GG	CC	GG	CC	GG	CC	GG	CC	CC	GG	GG	CC	CC	CC	GG	CC	GG	GG	GG	GG	CC	GG	CC	GG	CC	CC	GG	CC	CC
AX-94533970	1B	553142954	C/T	CC	CC	CC	CC	TT	CC	TT	CC	CC	CC	CC	TT	CC	CC	TT	CC	CC	CC	TT	CC	TT	CC	TT	CC	TT	TT	CC	CC	TT	TT	TT	CC	TT	CC	CC	CC	CC	TT	CC	TT	CC	TT	CC	CC	TT	TT
AX-94462858	1B	553146237	G/A	GG	GG	GG	GG	GG	GG	GG	GG	GG	GG	GG	GG	GG	GG	GG	GG	GG	GG	AA	GG	AA	GG	GG	GG	AA	GG	GG	GG	AA	GG	AA	GG	GG	GG	GG	GG	GG	AA	GG	AA	GG	GG	GG	GG	AA	AA
AX-94440309	1B	553146277	G/A	GG	GG	GG	GG	AA	GG	AA	GG	GG	GG	GG	AA	GG	GG	AA	GG	GG	GG	GG	GG	GG	GG	AA	GG	GG	AA	GG	GG	GG	AA	GG	GG	AA	GG	GG	GG	GG	GG	GG	GG	GG	AA	GG	GG	GG	GG
AX-95098916	1B	554137328	G/A	GG	AA	GG	GG	AA	GG	AA	GG	GG	GG	GG	GG	AA	GG	GG	GG	GG	GG	GG	GG	GG	GG	GG	GG	GG	GG	GG	GG	GG	AA	GG	GG	GG	GG	GG	GG	GG	GG	GG	GG	GG	AA	AA	GG	GG	GG
AX-94506324	1B	554137397	C/T	CC	CC	CC	CC	TT	CC	TT	CC	CC	CC	CC	TT	CC	CC	CC	CC	CC	CC	CC	CC	CC	CC	TT	CC	CC	CC	CC	CC	CC	TT	CC	CC	TT	CC	CC	CC	CC	CC	CC	CC	CC	TT	CC	CC	CC	CC
AX-95093502	1B	554586475	T/C	TT	TT	CC	TT	TT	TT	CC	TT	TT	TT	CC	TT	TT	TT	CC	TT	CC	TT	CC	TT	TT	CC	TT	TT	TT	TT	TT	TT	TT	CC	CC	TT	TT	TT	TT	CC	TT	CC	TT	CC	TT	CC	TT	TT	CC	TT
AX-94553964	1B	555629748	T/A	TT	AA	TT	TT	AA	TT	AA	TT	TT	TT	TT	TT	AA	TT	AA	TT	TT	TT	AA	TT	AA	TT	TT	TT	AA	AA	TT	TT	AA	AA	AA	TT	TT	TT	TT	TT	TT	AA	TT	AA	TT	AA	AA	TT	AA	AA
AX-94923443	1B	555638033	T/G	TT	TT	TT	TT	TT	TT	TT	TT	TT	TT	TT	TT	TT	TT	GG	TT	TT	TT	GG	TT	GG	TT	TT	TT	GG	GG	TT	TT	GG	TT	GG	TT	TT	TT	TT	TT	TT	GG	TT	GG	TT	TT	TT	TT	GG	GG
AX-94737748	1B	555639656	C/T	TT	CC	TT	TT	CC	TT	CC	TT	TT	TT	TT	CC	CC	TT	CC	TT	TT	TT	CC	TT	CC	TT	CC	TT	CC	CC	TT	TT	CC	CC	CC	TT	CC	TT	TT	TT	TT	CC	TT	CC	TT	CC	CC	TT	CC	CC
AX-94861289	1B	555935410	C/T	CC	CC	CC	CC	CC	CC	CC	CC	CC	CC	CC	TT	CC	CC	CC	CC	CC	CC	CC	CC	CC	CC	TT	CC	CC	CC	CC	CC	CC	CC	CC	CC	TT	CC	CC	CC	CC	CC	CC	CC	CC	CC	CC	CC	CC	CC
AX-95164040	1B	556210309	C/T	CC	CC	CC	CC	TT	TT	TT	TT	CC	CC	CC	TT	CC	CC	TT	CC	CC	TT	CC	CC	TT	CC	TT	CC	CC	CC	CC	CC	CC	TT	TT	CC	TT	CC	CC	CC	CC	TT	CC	CC	TT	TT	CC	CC	TT	CC
AX-94922385	1B	560019222	G/A	GG	AA	GG	GG	GG	GG	GG	GG	GG	GG	GG	GG	AA	GG	GG	GG	GG	GG	AA	GG	AA	GG	GG	GG	AA	GG	GG	GG	AA	GG	AA	GG	GG	GG	GG	GG	GG	AA	GG	AA	GG	GG	AA	GG	AA	AA
AX-95633286	1B	560494545	G/A	GG	GG	GG	GG	GG	GG	GG	GG	GG	GG	GG	AA	GG	GG	AA	GG	GG	GG	GG	GG	GG	GG	AA	GG	GG	AA	GG	GG	GG	GG	GG	GG	AA	GG	GG	GG	GG	GG	GG	GG	GG	GG	GG	GG	GG	GG
AX-94700217	1B	560712186	A/G	AA	AA	AA	AA	GG	AA	GG	AA	AA	AA	AA	GG	AA	AA	GG	AA	AA	AA	AA	AA	GG	AA	GG	AA	AA	GG	AA	AA	AA	GG	GG	AA	GG	AA	AA	AA	AA	GG	AA	GG	AA	GG	AA	AA	AA	AA
AX-94819564	1B	561505902	T/C	TT	TT	TT	TT	TT	TT	TT	TT	TT	CC	CC	TT	TT	TT	CC	TT	TT	TT	CC	TT	CC	TT	TT	NN	CC	CC	CC	TT	TT	CC	CC	TT	TT	TT	TT	TT	TT	TT	TT	TT	TT	CC	TT	TT	CC	TT
AX-94843973	1B	561643213	A/G	AA	GG	AA	AA	GG	AA	GG	AA	AA	AA	AA	AA	GG	AA	AA	AA	AA	AA	AA	AA	AA	AA	AA	AA	AA	AA	AA	AA	AA	GG	AA	AA	AA	AA	AA	AA	AA	AA	AA	AA	AA	GG	GG	AA	AA	AA
AX-95220675	1B	562212740	G/A	AA	AA	AA	GG	GG	AA	GG	AA	GG	GG	GG	GG	AA	AA	AA	GG	AA	AA	GG	GG	GG	GG	AA	GG	GG	AA	GG	AA	GG	GG	GG	GG	GG	AA	GG	GG	GG	GG	GG	GG	GG	GG	AA	GG	GG	GG
AX-95629053	1B	562375067	G/A	AA	AA	AA	GG	GG	AA	GG	AA	GG	GG	GG	GG	AA	AA	AA	GG	AA	AA	GG	GG	AA	GG	AA	GG	GG	AA	GG	AA	GG	GG	AA	GG	GG	AA	GG	GG	GG	AA	GG	AA	GG	GG	AA	GG	GG	GG
AX-94827580	1B	562489642	A/T	AA	AA	AA	AA	AA	AA	AA	AA	AA	AA	AA	TT	AA	AA	AA	AA	AA	AA	TT	AA	AA	AA	AA	AA	TT	AA	AA	AA	TT	AA	AA	AA	TT	AA	AA	AA	AA	AA	AA	AA	AA	AA	AA	AA	TT	TT
AX-94652226	1B	562889374	T/C	TT	TT	TT	CC	TT	TT	TT	TT	CC	CC	CC	TT	TT	TT	TT	CC	TT	TT	TT	CC	TT	CC	TT	CC	TT	TT	CC	TT	TT	TT	TT	CC	TT	TT	CC	CC	CC	TT	CC	TT	CC	TT	TT	CC	TT	TT
AX-94488007	1B	562893235	C/G	CC	CC	CC	CC	GG	CC	GG	CC	CC	CC	CC	GG	CC	CC	CC	CC	CC	CC	GG	CC	GG	CC	CC	CC	GG	CC	CC	CC	GG	GG	GG	CC	GG	CC	CC	CC	CC	GG	CC	GG	CC	GG	CC	CC	GG	GG
AX-94630834	1B	564022546	T/C	TT	TT	TT	TT	TT	TT	TT	CC	TT	TT	TT	TT	TT	TT	CC	TT	TT	TT	TT	CC	CC	CC	TT	TT	TT	CC	TT	TT	TT	TT	CC	TT	TT	TT	CC	CC	CC	CC	TT	TT	TT	TT	TT	TT	CC	TT
AX-94757270	1B	564908889	G/C	GG	CC	GG	GG	GG	GG	GG	GG	CC	GG	GG	GG	CC	GG	CC	GG	GG	GG	GG	GG	CC	GG	CC	GG	GG	CC	CC	GG	GG	GG	CC	GG	GG	GG	GG	GG	GG	CC	GG	CC	GG	CC	CC	GG	GG	GG
AX-95654644	1B	566603698	A/G	AA	AA	AA	GG	GG	AA	GG	AA	AA	GG	GG	AA	AA	AA	GG	GG	AA	AA	AA	GG	AA	GG	GG	GG	AA	GG	AA	AA	AA	GG	AA	GG	AA	AA	GG	GG	GG	AA	GG	AA	GG	AA	AA	GG	AA	AA
AX-94870113	1B	566831265	C/T	TT	CC	TT	TT	TT	TT	TT	TT	CC	TT	CC	CC	CC	TT	CC	CC	TT	TT	CC	CC	CC	CC	CC	CC	CC	CC	CC	TT	CC	TT	CC	TT	CC	TT	CC	CC	CC	CC	TT	CC	TT	CC	CC	CC	CC	CC
AX-94533666	1B	566831545	G/A	AA	AA	AA	AA	AA	AA	AA	AA	GG	AA	GG	GG	AA	AA	GG	GG	AA	AA	GG	GG	GG	GG	GG	GG	GG	GG	GG	AA	GG	AA	GG	AA	GG	AA	GG	GG	GG	GG	AA	GG	AA	GG	AA	GG	GG	GG
AX-95085043	1B	566837150	G/C	GG	GG	GG	GG	GG	GG	GG	GG	CC	GG	CC	CC	GG	GG	GG	CC	GG	GG	CC	CC	CC	CC	GG	CC	CC	GG	CC	GG	CC	GG	CC	GG	CC	GG	CC	CC	CC	CC	GG	CC	GG	CC	GG	CC	CC	CC
AX-94950274	1B	566837501	C/T	CC	CC	CC	CC	CC	CC	CC	CC	CC	CC	CC	CC	CC	CC	TT	CC	CC	CC	CC	CC	CC	CC	TT	CC	CC	TT	CC	CC	CC	CC	CC	CC	CC	CC	CC	CC	CC	CC	CC	CC	CC	CC	CC	CC	CC	CC
AX-94521499	1B	566838422	C/T	TT	CC	TT	TT	TT	TT	TT	TT	CC	TT	CC	CC	CC	TT	CC	CC	TT	TT	CC	CC	CC	CC	CC	CC	CC	CC	CC	TT	CC	TT	CC	TT	CC	TT	CC	CC	CC	CC	TT	CC	TT	CC	CC	CC	CC	CC
AX-94481264	1B	566838860	C/T	CC	CC	CC	CC	CC	CC	CC	CC	TT	CC	TT	TT	CC	CC	CC	TT	CC	CC	TT	TT	TT	TT	CC	TT	TT	CC	TT	TT	TT	CC	TT	CC	TT	CC	TT	TT	TT	TT	CC	TT	CC	TT	CC	TT	TT	TT
AX-94675565	1B	567976443	A/T	NN	TT	TT	AA	AA	NN	AA	TT	AA	AA	AA	AA	TT	TT	AA	AA	TT	TT	AA	AA	AA	AA	AA	AA	AA	AA	NN	TT	AA	AA	AA	AA	AA	TT	AA	AA	AA	AA	AA	AA	AA	AA	TT	AA	AA	AA
AX-94609877	1B	568522718	C/T	TT	CC	TT	CC	CC	TT	CC	TT	CC	CC	CC	CC	CC	TT	CC	CC	TT	TT	CC	CC	CC	CC	CC	CC	CC	CC	CC	TT	CC	CC	CC	CC	CC	TT	CC	CC	CC	CC	CC	CC	CC	CC	CC	CC	CC	CC
AX-94981461	1B	569977032	A/C	CC	CC	CC	AA	AA	CC	AA	CC	AA	AA	AA	AA	CC	CC	CC	AA	CC	CC	AA	AA	AA	AA	CC	AA	AA	CC	NN	CC	AA	AA	AA	AA	AA	CC	AA	AA	AA	AA	AA	AA	AA	AA	CC	AA	AA	AA
AX-94879094	1B	570484546	T/C	TT	CC	TT	TT	TT	TT	TT	TT	TT	TT	TT	TT	CC	TT	CC	TT	TT	TT	TT	TT	TT	TT	CC	TT	TT	CC	TT	TT	TT	TT	TT	TT	TT	TT	TT	TT	TT	TT	TT	TT	TT	TT	CC	TT	TT	TT
AX-95220005	1B	572296982	A/G	GG	GG	GG	AA	AA	GG	AA	GG	AA	AA	AA	AA	GG	AA	AA	AA	GG	GG	AA	AA	AA	AA	AA	AA	AA	AA	AA	GG	AA	AA	AA	AA	AA	GG	AA	AA	AA	AA	AA	AA	AA	AA	GG	AA	AA	AA
AX-94581937	1B	572532716	T/C	TT	TT	TT	CC	TT	TT	TT	TT	TT	CC	TT	TT	TT	CC	TT	TT	TT	TT	TT	TT	CC	TT	TT	TT	TT	TT	TT	TT	TT	TT	CC	CC	TT	TT	TT	TT	TT	CC	CC	TT	CC	CC	TT	TT	TT	TT
AX-95251222	1B	572532727	T/G	GG	TT	GG	TT	TT	GG	TT	GG	TT	TT	TT	TT	TT	TT	TT	TT	GG	GG	TT	TT	TT	TT	TT	TT	TT	TT	TT	GG	TT	TT	TT	TT	TT	GG	TT	TT	TT	TT	TT	TT	TT	TT	TT	TT	TT	TT
AX-94721930	1B	573572217	T/C	TT	CC	TT	TT	TT	TT	TT	TT	TT	TT	TT	TT	CC	TT	TT	TT	TT	TT	TT	TT	CC	TT	TT	TT	TT	TT	TT	TT	TT	TT	CC	TT	TT	TT	TT	TT	TT	CC	TT	TT	TT	CC	CC	TT	TT	TT
AX-94553499	1B	573875607	C/T	TT	CC	TT	CC	CC	TT	CC	TT	CC	CC	TT	CC	CC	CC	CC	TT	TT	TT	CC	TT	TT	TT	CC	TT	CC	CC	CC	TT	CC	CC	TT	CC	CC	TT	TT	TT	TT	TT	CC	TT	CC	TT	CC	TT	CC	CC
AX-94411493	1B	574463864	T/C	CC	CC	CC	TT	TT	CC	TT	CC	TT	TT	CC	TT	CC	TT	TT	CC	CC	CC	TT	CC	TT	CC	TT	CC	TT	TT	TT	CC	TT	TT	TT	TT	TT	CC	CC	CC	CC	TT	TT	CC	TT	TT	CC	CC	TT	TT
AX-94584294	1B	575722339	T/C	TT	CC	TT	TT	TT	TT	TT	TT	TT	TT	CC	TT	CC	TT	TT	CC	TT	TT	TT	CC	TT	CC	TT	CC	TT	TT	TT	TT	TT	TT	TT	TT	TT	TT	CC	CC	CC	TT	TT	CC	TT	TT	CC	CC	TT	TT
AX-94525557	1B	575867850	A/G	GG	AA	GG	AA	AA	GG	AA	GG	AA	AA	AA	AA	AA	AA	AA	AA	GG	GG	AA	AA	AA	AA	AA	AA	AA	AA	AA	GG	AA	AA	AA	AA	AA	GG	AA	AA	AA	AA	AA	AA	AA	AA	AA	AA	AA	AA
AX-95254907	1B	576219463	T/C	CC	TT	CC	TT	TT	CC	TT	CC	TT	TT	CC	TT	TT	TT	TT	CC	CC	CC	TT	CC	TT	CC	TT	CC	TT	TT	TT	CC	TT	TT	TT	TT	TT	CC	CC	CC	CC	TT	TT	CC	TT	TT	TT	CC	TT	TT
AX-94940413	1B	579557166	T/C	TT	TT	TT	TT	CC	TT	CC	TT	CC	TT	TT	CC	TT	TT	TT	TT	TT	TT	CC	TT	CC	TT	TT	TT	CC	TT	CC	TT	CC	CC	CC	TT	CC	TT	TT	TT	NN	CC	TT	TT	TT	CC	TT	TT	CC	CC
AX-95155091	1B	579797870	G/T	GG	GG	GG	GG	GG	GG	GG	GG	GG	GG	GG	GG	GG	GG	GG	GG	GG	GG	TT	GG	TT	GG	GG	GG	TT	GG	GG	GG	GG	TT	GG	GG	GG	GG	GG	GG	GG	GG	GG	GG	GG	GG	GG	GG	TT	GG
AX-94596846	1B	580537943	C/T	CC	CC	CC	CC	TT	CC	TT	CC	TT	CC	TT	TT	CC	CC	CC	TT	CC	CC	TT	TT	TT	TT	CC	TT	TT	CC	TT	CC	TT	TT	TT	CC	TT	CC	TT	TT	TT	TT	CC	TT	CC	TT	CC	TT	TT	TT
AX-94858556	1B	581201893	C/T	TT	CC	TT	CC	CC	TT	CC	TT	CC	CC	CC	CC	CC	CC	CC	CC	TT	TT	CC	CC	CC	CC	CC	CC	CC	CC	CC	TT	CC	CC	CC	CC	CC	TT	CC	CC	CC	CC	CC	CC	CC	CC	CC	CC	CC	CC
AX-94794804	1B	581412894	C/T	TT	TT	TT	CC	CC	TT	CC	TT	CC	CC	CC	CC	TT	CC	TT	CC	TT	TT	CC	CC	CC	CC	TT	CC	CC	TT	CC	TT	CC	CC	CC	CC	CC	TT	CC	CC	CC	CC	CC	CC	CC	CC	TT	CC	CC	TT
AX-94514865	1B	581691143	C/T	CC	TT	CC	CC	CC	CC	CC	CC	CC	CC	CC	CC	TT	CC	TT	CC	CC	CC	CC	CC	CC	CC	TT	CC	CC	TT	CC	CC	CC	CC	CC	CC	CC	CC	CC	CC	CC	CC	CC	CC	CC	CC	TT	CC	CC	CC
AX-94620168	1B	582905701	C/T	CC	TT	CC	TT	TT	CC	TT	CC	CC	TT	CC	CC	TT	TT	TT	CC	CC	CC	CC	CC	CC	CC	TT	CC	CC	TT	CC	CC	CC	TT	CC	TT	CC	CC	CC	CC	CC	CC	TT	CC	TT	CC	TT	CC	CC	TT
AX-95631543	1B	583147095	A/G	AA	GG	AA	AA	GG	AA	GG	AA	AA	AA	AA	AA	GG	AA	AA	AA	AA	AA	AA	AA	AA	AA	AA	AA	AA	AA	AA	AA	AA	GG	AA	AA	AA	AA	AA	AA	AA	AA	AA	AA	AA	AA	GG	AA	AA	GG
AX-94775747	1B	583446300	C/T	TT	CC	TT	CC	CC	TT	CC	TT	CC	CC	CC	CC	CC	CC	CC	CC	TT	TT	CC	CC	TT	CC	CC	CC	CC	CC	CC	TT	CC	CC	TT	CC	CC	TT	CC	CC	CC	TT	CC	CC	CC	TT	CC	CC	CC	CC
AX-94788008	1B	584108344	A/G	AA	AA	AA	AA	AA	AA	AA	AA	AA	AA	AA	AA	AA	AA	AA	AA	AA	AA	AA	AA	GG	AA	AA	AA	AA	AA	AA	AA	AA	AA	GG	AA	AA	AA	AA	AA	AA	GG	AA	AA	AA	GG	AA	AA	AA	AA
AX-94449276	1B	585679667	T/C	CC	CC	CC	TT	TT	CC	TT	CC	TT	TT	TT	TT	CC	TT	TT	TT	CC	CC	TT	TT	TT	TT	TT	TT	TT	TT	TT	CC	TT	TT	TT	TT	TT	CC	TT	TT	TT	TT	TT	TT	TT	TT	CC	TT	TT	TT
AX-95208058	1B	586302823	C/T	CC	TT	CC	CC	CC	CC	CC	CC	TT	CC	TT	TT	TT	CC	CC	TT	CC	TT	CC	TT	TT	TT	CC	TT	CC	CC	TT	CC	TT	CC	TT	CC	TT	CC	TT	TT	TT	TT	CC	TT	CC	TT	TT	TT	CC	CC
AX-94751680	1B	587515998	T/C	TT	TT	TT	TT	TT	TT	TT	TT	TT	TT	TT	TT	TT	TT	CC	TT	TT	TT	CC	TT	TT	TT	CC	TT	CC	CC	TT	TT	TT	TT	TT	TT	TT	TT	TT	TT	TT	TT	TT	TT	TT	TT	TT	TT	CC	TT
AX-94974179	1B	587986010	T/C	TT	CC	TT	TT	TT	TT	TT	TT	CC	TT	CC	CC	CC	TT	TT	CC	TT	CC	TT	CC	CC	CC	TT	CC	TT	TT	CC	TT	CC	TT	CC	TT	CC	TT	CC	CC	CC	CC	TT	CC	TT	CC	CC	CC	TT	TT
AX-95685151	1B	588800320	G/A	GG	GG	GG	GG	GG	GG	GG	GG	GG	GG	GG	GG	GG	GG	AA	GG	GG	GG	AA	GG	GG	GG	AA	GG	AA	AA	GG	GG	GG	GG	GG	GG	GG	GG	GG	GG	GG	GG	GG	GG	GG	GG	GG	GG	AA	GG
AX-95234898	1B	589071964	C/T	TT	TT	TT	CC	CC	TT	CC	TT	CC	CC	TT	TT	TT	CC	CC	TT	TT	TT	CC	TT	CC	TT	CC	TT	CC	CC	CC	TT	TT	CC	CC	CC	TT	TT	TT	TT	TT	CC	CC	TT	CC	CC	TT	TT	CC	CC
AX-94417290	1B	589225542	G/A	GG	GG	GG	GG	AA	GG	AA	GG	AA	GG	AA	AA	GG	GG	GG	AA	GG	GG	AA	AA	AA	AA	GG	AA	AA	GG	AA	GG	AA	AA	AA	GG	AA	GG	AA	AA	AA	AA	GG	AA	GG	AA	GG	AA	AA	AA
AX-94771307	1B	592166941	A/G	AA	GG	AA	AA	AA	AA	AA	AA	AA	AA	GG	GG	GG	AA	AA	GG	AA	GG	AA	GG	AA	GG	AA	GG	AA	AA	AA	AA	GG	AA	AA	AA	GG	AA	GG	GG	GG	AA	AA	GG	AA	AA	GG	GG	AA	AA
AX-95232141	1B	592364640	A/G	GG	AA	GG	AA	AA	GG	AA	GG	AA	AA	AA	AA	AA	GG	AA	AA	GG	AA	AA	AA	AA	AA	AA	AA	AA	AA	AA	GG	AA	AA	AA	AA	AA	GG	AA	AA	AA	AA	AA	AA	AA	AA	AA	AA	AA	AA
AX-94481547	1B	593234272	A/G	AA	AA	AA	AA	AA	AA	AA	GG	AA	AA	AA	AA	AA	AA	GG	AA	AA	AA	AA	AA	GG	AA	AA	AA	AA	AA	AA	AA	AA	AA	GG	AA	AA	AA	AA	AA	AA	GG	AA	AA	AA	AA	AA	AA	GG	AA
AX-94402431	1B	594138426	G/T	TT	TT	TT	GG	GG	TT	GG	TT	GG	GG	GG	GG	TT	TT	GG	GG	TT	GG	GG	GG	GG	GG	GG	GG	GG	GG	GG	TT	GG	GG	GG	GG	GG	TT	GG	GG	GG	GG	GG	GG	GG	GG	TT	GG	GG	GG
AX-94860459	1B	599334545	A/T	AA	AA	AA	AA	AA	AA	AA	AA	AA	AA	AA	AA	AA	AA	AA	AA	AA	AA	AA	AA	TT	AA	AA	AA	AA	AA	AA	AA	AA	AA	TT	AA	AA	AA	AA	AA	AA	TT	AA	AA	AA	TT	AA	AA	AA	AA
AX-94733079	1B	599340188	C/T	CC	CC	CC	CC	CC	CC	CC	CC	CC	CC	CC	CC	CC	CC	CC	CC	CC	CC	CC	CC	TT	CC	CC	CC	CC	CC	NN	CC	CC	CC	TT	CC	CC	CC	CC	CC	CC	TT	CC	CC	CC	TT	CC	CC	CC	CC
AX-94549122	1B	603302170	C/T	CC	CC	CC	TT	TT	CC	TT	CC	CC	TT	TT	TT	CC	CC	CC	TT	CC	TT	CC	TT	CC	TT	CC	TT	CC	CC	CC	CC	TT	TT	CC	TT	TT	CC	TT	TT	TT	CC	TT	TT	TT	CC	CC	TT	CC	CC
AX-94525416	1B	609307604	C/G	GG	GG	GG	GG	CC	CC	CC	GG	CC	GG	GG	CC	GG	GG	CC	CC	GG	CC	CC	GG	CC	GG	CC	CC	CC	CC	CC	GG	CC	CC	CC	GG	CC	GG	GG	GG	GG	CC	GG	GG	GG	CC	GG	GG	CC	GG
AX-94381637	1B	612828113	C/T	TT	TT	TT	CC	CC	CC	CC	TT	CC	CC	CC	CC	TT	TT	CC	CC	TT	CC	CC	CC	CC	CC	CC	CC	CC	CC	CC	TT	CC	CC	CC	CC	CC	TT	CC	CC	CC	CC	CC	CC	CC	CC	TT	CC	CC	CC
AX-94933502	1B	613236060	T/C	TT	CC	TT	TT	TT	TT	TT	CC	TT	TT	TT	TT	CC	CC	CC	TT	TT	TT	CC	TT	CC	TT	CC	TT	CC	CC	TT	TT	TT	TT	CC	TT	TT	TT	TT	TT	TT	CC	TT	TT	TT	CC	CC	TT	CC	CC
AX-94746478	1B	613416938	C/T	CC	TT	CC	CC	CC	CC	CC	TT	CC	CC	CC	CC	TT	TT	CC	CC	CC	CC	CC	CC	CC	CC	CC	CC	CC	CC	CC	CC	CC	CC	CC	CC	CC	CC	CC	CC	CC	CC	CC	CC	CC	CC	TT	CC	CC	TT
AX-94873552	1B	613423080	C/T	TT	CC	TT	TT	TT	TT	TT	CC	TT	TT	CC	TT	CC	CC	CC	TT	TT	TT	CC	CC	CC	CC	CC	TT	CC	CC	TT	TT	TT	TT	CC	TT	TT	TT	CC	CC	CC	CC	TT	CC	TT	CC	CC	TT	CC	TT
AX-94642880	1B	615020705	A/C	AA	CC	AA	AA	AA	AA	AA	CC	AA	AA	CC	AA	CC	CC	AA	AA	AA	AA	AA	CC	AA	CC	AA	AA	AA	AA	AA	AA	AA	AA	AA	AA	AA	AA	CC	CC	CC	AA	AA	CC	AA	AA	CC	AA	AA	AA
AX-95684836	1B	619687919	A/G	AA	AA	AA	GG	AA	AA	AA	AA	GG	GG	AA	AA	AA	AA	GG	AA	AA	AA	GG	AA	GG	AA	GG	AA	GG	GG	GG	NN	AA	GG	GG	GG	AA	AA	AA	AA	AA	GG	GG	AA	GG	GG	AA	GG	GG	GG
AX-94508154	1B	621270363	T/A	TT	TT	TT	TT	TT	TT	TT	TT	TT	TT	TT	TT	TT	TT	AA	TT	TT	TT	AA	TT	AA	TT	AA	TT	AA	AA	TT	TT	TT	AA	AA	TT	TT	TT	TT	TT	TT	AA	TT	TT	TT	AA	TT	TT	AA	TT
AX-94464561	1B	621636633	C/A	CC	CC	CC	AA	CC	CC	CC	CC	AA	AA	CC	CC	CC	CC	CC	CC	CC	CC	CC	CC	CC	CC	CC	CC	CC	CC	AA	CC	CC	CC	CC	AA	CC	CC	CC	CC	CC	CC	AA	CC	AA	CC	CC	AA	CC	AA
AX-95252958	1B	622313895	G/T	GG	GG	GG	GG	GG	GG	GG	GG	GG	GG	TT	GG	GG	GG	GG	GG	GG	GG	GG	TT	GG	TT	GG	GG	GG	GG	GG	GG	GG	GG	GG	GG	GG	GG	TT	TT	TT	GG	GG	TT	GG	GG	GG	GG	GG	GG
AX-94801647	1B	622571854	A/G	AA	GG	AA	AA	AA	AA	AA	GG	AA	AA	AA	AA	GG	GG	AA	AA	AA	AA	AA	AA	AA	AA	AA	AA	AA	AA	AA	AA	AA	AA	AA	AA	AA	AA	AA	AA	AA	AA	AA	AA	AA	AA	GG	AA	AA	GG
AX-95014058	1B	623731334	A/G	GG	GG	GG	AA	GG	GG	GG	GG	AA	AA	AA	GG	GG	GG	AA	GG	GG	GG	AA	AA	AA	AA	AA	GG	AA	AA	AA	GG	GG	AA	AA	AA	GG	GG	AA	AA	AA	AA	AA	AA	AA	AA	GG	AA	AA	AA
AX-94891150	1B	623769211	T/G	GG	GG	GG	TT	GG	GG	GG	GG	TT	TT	TT	GG	GG	GG	TT	GG	GG	GG	TT	TT	TT	TT	TT	GG	TT	TT	TT	GG	GG	TT	TT	TT	GG	GG	TT	TT	TT	TT	TT	TT	TT	TT	GG	TT	TT	GG
AX-95249324	1B	623833216	G/A	GG	AA	GG	GG	GG	GG	GG	AA	GG	GG	GG	GG	AA	AA	GG	GG	GG	GG	GG	GG	GG	GG	GG	GG	GG	GG	GG	GG	GG	GG	GG	GG	GG	GG	GG	GG	GG	GG	GG	GG	GG	GG	AA	GG	GG	GG
AX-95025993	1B	623962426	G/A	GG	GG	GG	AA	GG	GG	GG	GG	AA	AA	AA	GG	GG	GG	GG	GG	GG	GG	GG	AA	GG	AA	GG	GG	GG	GG	AA	GG	GG	GG	GG	AA	GG	GG	AA	AA	AA	GG	AA	AA	AA	GG	GG	AA	GG	AA
AX-94922458	1B	625909714	G/A	AA	GG	AA	GG	GG	GG	GG	GG	GG	GG	GG	GG	GG	GG	GG	AA	AA	AA	GG	GG	NN	GG	GG	AA	AA	GG	GG	AA	AA	GG	GG	GG	GG	AA	GG	GG	GG	AA	GG	GG	GG	GG	GG	GG	GG	AA
AX-94914633	1B	626506967	T/G	TT	TT	TT	TT	TT	TT	TT	TT	TT	TT	TT	TT	TT	TT	GG	TT	TT	TT	GG	TT	TT	TT	GG	TT	TT	GG	TT	TT	TT	GG	TT	TT	TT	TT	TT	TT	TT	GG	TT	TT	TT	TT	TT	TT	GG	TT
AX-94667549	1B	626724988	T/C	TT	CC	CC	TT	CC	TT	CC	CC	CC	TT	TT	TT	CC	CC	CC	TT	TT	TT	CC	TT	TT	TT	CC	TT	TT	CC	CC	TT	TT	CC	TT	TT	TT	TT	TT	TT	TT	CC	TT	TT	TT	TT	CC	TT	CC	CC
AX-94446956	1B	626864308	T/G	GG	TT	TT	TT	TT	TT	TT	TT	TT	TT	TT	TT	TT	TT	TT	GG	GG	GG	TT	TT	TT	GG	TT	GG	GG	TT	TT	GG	GG	TT	TT	TT	TT	GG	TT	TT	TT	TT	TT	TT	TT	TT	TT	TT	TT	TT
AX-94501371	1B	628514405	C/G	CC	GG	GG	CC	GG	CC	GG	GG	CC	CC	CC	CC	GG	GG	GG	CC	CC	CC	GG	CC	CC	CC	GG	CC	CC	GG	CC	CC	CC	GG	CC	CC	CC	CC	CC	GG	CC	GG	CC	GG	CC	CC	GG	CC	GG	GG
AX-94661194	1B	628795065	T/C	TT	TT	TT	CC	TT	CC	TT	TT	CC	CC	CC	CC	TT	TT	TT	TT	TT	TT	TT	CC	CC	TT	TT	TT	TT	TT	CC	CC	TT	TT	CC	CC	CC	CC	CC	TT	CC	TT	CC	TT	CC	CC	TT	CC	TT	TT
AX-94871042	1B	628811589	C/A	CC	CC	AA	CC	AA	CC	AA	AA	CC	CC	CC	CC	CC	AA	AA	CC	CC	CC	AA	CC	CC	CC	AA	CC	CC	AA	CC	CC	CC	AA	CC	CC	CC	CC	CC	AA	CC	AA	CC	AA	CC	CC	CC	CC	AA	CC
AX-95254185	1B	629262934	G/A	GG	AA	AA	GG	AA	GG	AA	AA	GG	GG	GG	GG	AA	AA	AA	AA	GG	GG	AA	GG	GG	GG	AA	GG	GG	AA	GG	GG	GG	AA	GG	GG	GG	GG	GG	AA	GG	AA	GG	AA	GG	GG	AA	GG	AA	AA
AX-94395727	1B	629486741	A/G	AA	GG	GG	AA	GG	AA	GG	AA	AA	AA	AA	AA	GG	AA	AA	GG	AA	AA	AA	AA	AA	AA	AA	AA	AA	AA	AA	AA	AA	GG	AA	AA	AA	AA	AA	AA	AA	AA	AA	AA	AA	AA	GG	AA	AA	AA
AX-95633911	1B	629940675	A/G	AA	AA	AA	GG	AA	GG	AA	AA	AA	GG	GG	GG	AA	AA	AA	AA	AA	AA	AA	GG	GG	AA	AA	AA	AA	NN	NN	AA	AA	AA	GG	GG	GG	GG	GG	AA	GG	NN	GG	AA	GG	GG	AA	GG	AA	AA
AX-94647261	1B	631817914	C/T	CC	CC	CC	TT	CC	CC	CC	CC	CC	TT	CC	CC	CC	TT	CC	CC	CC	CC	CC	CC	CC	CC	CC	CC	CC	CC	CC	CC	CC	CC	CC	TT	CC	TT	CC	CC	CC	CC	TT	CC	TT	CC	CC	TT	CC	CC
AX-94719582	1B	632420554	T/C	TT	TT	TT	TT	TT	TT	TT	NN	TT	TT	TT	TT	TT	TT	CC	TT	TT	TT	TT	TT	CC	TT	CC	TT	CC	TT	TT	TT	TT	TT	CC	TT	TT	TT	TT	TT	TT	CC	TT	TT	TT	TT	TT	TT	CC	TT
AX-94550466	1B	632421897	T/C	TT	CC	TT	CC	TT	TT	TT	TT	TT	CC	TT	TT	CC	CC	TT	CC	TT	TT	TT	TT	TT	TT	TT	TT	TT	TT	TT	TT	TT	TT	TT	CC	TT	CC	TT	TT	TT	TT	CC	TT	CC	TT	CC	CC	TT	TT
AX-95085162	1B	633120807	T/C	TT	CC	CC	CC	CC	TT	CC	TT	TT	CC	TT	TT	CC	CC	TT	CC	TT	TT	TT	TT	TT	TT	TT	TT	TT	TT	TT	TT	TT	CC	TT	CC	TT	CC	TT	TT	TT	TT	CC	TT	CC	TT	CC	CC	TT	CC
AX-94462630	1B	633135975	G/C	CC	GG	GG	GG	GG	CC	GG	GG	GG	GG	CC	CC	GG	GG	GG	GG	CC	CC	GG	CC	CC	CC	GG	CC	GG	GG	GG	NN	CC	GG	CC	GG	CC	GG	CC	GG	GG	GG	GG	GG	GG	CC	GG	GG	GG	GG
AX-94599504	1B	633137350	A/C	AA	AA	AA	AA	AA	AA	AA	CC	CC	AA	AA	AA	AA	AA	CC	AA	AA	AA	CC	AA	AA	AA	CC	AA	CC	CC	CC	AA	AA	AA	AA	AA	AA	AA	AA	CC	CC	CC	AA	CC	AA	AA	AA	AA	CC	AA
AX-94506199	1B	633235949	G/C	CC	CC	CC	CC	GG	GG	GG	CC	GG	CC	CC	GG	CC	CC	GG	GG	CC	GG	CC	GG	GG	GG	CC	GG	GG	GG	GG	CC	GG	GG	GG	CC	GG	CC	GG	GG	GG	GG	CC	GG	GG	GG	CC	GG	GG	GG
AX-94986476	1B	634150703	G/A	GG	GG	GG	GG	GG	GG	GG	GG	GG	GG	GG	GG	GG	GG	GG	GG	GG	AA	GG	AA	AA	AA	GG	AA	GG	AA	GG	GG	GG	GG	GG	GG	GG	GG	AA	AA	AA	AA	GG	GG	GG	GG	GG	AA	AA	GG
AX-94552269	1B	634565639	G/C	GG	CC	GG	GG	CC	GG	CC	GG	GG	GG	GG	GG	CC	GG	GG	CC	GG	GG	GG	GG	GG	GG	GG	GG	GG	GG	GG	CC	GG	GG	GG	GG	GG	GG	GG	GG	GG	GG	GG	GG	GG	GG	CC	GG	GG	GG
AX-94773580	1B	634998433	T/G	TT	GG	TT	GG	TT	TT	TT	TT	TT	GG	TT	TT	GG	GG	TT	GG	TT	TT	TT	TT	TT	TT	TT	TT	TT	TT	TT	TT	TT	TT	TT	GG	TT	GG	TT	TT	TT	TT	GG	TT	GG	TT	GG	GG	TT	GG
AX-94561803	1B	637398527	C/A	AA	CC	AA	AA	AA	CC	AA	CC	AA	AA	AA	CC	CC	AA	CC	CC	AA	AA	CC	AA	AA	AA	CC	AA	CC	CC	AA	AA	AA	AA	AA	AA	CC	AA	AA	CC	CC	CC	AA	CC	AA	AA	CC	AA	CC	AA
AX-94716273	1B	637499478	T/A	AA	TT	AA	AA	AA	TT	AA	TT	AA	AA	AA	TT	TT	AA	TT	TT	AA	AA	TT	AA	AA	AA	TT	AA	TT	TT	AA	AA	AA	AA	AA	AA	TT	AA	AA	TT	TT	TT	AA	TT	AA	AA	TT	AA	TT	AA
AX-94950893	1B	638015170	G/A	GG	GG	GG	GG	GG	AA	GG	GG	AA	GG	GG	AA	GG	GG	GG	GG	GG	GG	GG	GG	GG	GG	GG	GG	GG	GG	AA	NN	GG	GG	GG	GG	AA	GG	GG	GG	GG	GG	GG	GG	GG	GG	GG	GG	GG	GG
AX-94515822	1B	638930442	G/C	GG	GG	CC	GG	CC	GG	CC	GG	GG	GG	CC	GG	GG	GG	GG	GG	GG	GG	GG	CC	GG	CC	GG	GG	GG	GG	GG	GG	GG	CC	GG	GG	GG	GG	CC	GG	GG	GG	GG	GG	GG	GG	GG	GG	GG	GG
AX-94810466	1B	640566705	T/C	TT	TT	CC	TT	CC	TT	CC	TT	CC	TT	CC	TT	TT	TT	TT	TT	TT	TT	TT	CC	TT	CC	TT	TT	TT	TT	CC	TT	TT	CC	TT	TT	TT	TT	CC	TT	TT	TT	TT	TT	TT	TT	TT	TT	TT	TT
AX-94470457	1B	642958324	A/C	AA	AA	AA	AA	AA	AA	AA	CC	AA	AA	AA	AA	AA	AA	CC	AA	AA	AA	AA	AA	CC	AA	AA	AA	AA	AA	AA	AA	AA	AA	CC	AA	AA	AA	AA	AA	AA	CC	AA	AA	AA	AA	AA	AA	CC	AA
AX-94439319	1B	643094939	C/T	CC	TT	TT	TT	TT	CC	TT	TT	CC	TT	TT	CC	TT	TT	CC	TT	CC	CC	CC	TT	CC	TT	CC	CC	CC	CC	CC	CC	CC	TT	CC	TT	CC	TT	TT	CC	TT	CC	TT	CC	TT	CC	TT	TT	CC	TT
AX-94623039	1B	643590967	C/T	CC	TT	TT	CC	TT	CC	TT	CC	CC	CC	TT	CC	CC	CC	CC	CC	CC	CC	CC	TT	CC	TT	CC	CC	CC	CC	CC	CC	CC	TT	CC	CC	CC	CC	TT	CC	CC	CC	CC	CC	CC	CC	TT	CC	CC	CC
AX-94731046	1B	645252540	G/A	GG	AA	GG	GG	GG	GG	GG	AA	GG	GG	GG	GG	AA	AA	GG	GG	GG	GG	GG	GG	GG	GG	GG	GG	GG	GG	GG	GG	GG	GG	GG	GG	GG	GG	GG	GG	GG	GG	GG	GG	GG	GG	AA	GG	GG	GG
AX-94537059	1B	645707907	T/C	TT	TT	TT	CC	TT	TT	TT	CC	CC	TT	TT	CC	CC	CC	TT	CC	TT	TT	TT	TT	TT	TT	TT	TT	TT	TT	TT	TT	TT	TT	TT	CC	CC	CC	TT	TT	CC	TT	CC	TT	CC	TT	TT	CC	TT	CC
AX-95630334	1B	646171902	G/A	GG	GG	AA	GG	AA	GG	AA	GG	GG	GG	AA	GG	GG	GG	GG	GG	AA	GG	GG	AA	AA	AA	GG	AA	GG	GG	AA	AA	GG	AA	AA	GG	GG	GG	AA	GG	GG	GG	GG	GG	GG	AA	GG	GG	GG	AA
AX-94528040	1B	651283418	C/A	AA	CC	CC	CC	CC	AA	CC	CC	AA	AA	CC	CC	CC	AA	CC	CC	CC	AA	AA	AA	CC	CC	AA	CC	AA	CC	CC	CC	AA	CC	CC	CC	CC	CC	CC	CC	CC	AA	CC	CC	CC	CC	CC	CC	CC	CC
AX-94664597	1B	651544423	T/G	GG	GG	TT	TT	GG	GG	GG	TT	GG	GG	TT	TT	TT	GG	TT	TT	TT	GG	GG	GG	TT	TT	GG	TT	GG	TT	TT	TT	GG	GG	TT	TT	TT	TT	TT	TT	TT	GG	TT	TT	TT	GG	GG	TT	TT	TT
AX-94761084	1B	653874352	A/C	AA	CC	CC	AA	AA	AA	AA	AA	CC	AA	CC	CC	AA	AA	AA	AA	CC	AA	AA	AA	CC	CC	AA	CC	AA	AA	CC	CC	AA	AA	CC	AA	CC	CC	CC	CC	AA	AA	AA	CC	AA	AA	CC	CC	CC	CC
AX-94779390	1B	654922246	T/G	TT	GG	TT	TT	TT	TT	TT	GG	GG	TT	TT	TT	GG	TT	TT	GG	GG	TT	TT	TT	GG	TT	TT	TT	TT	TT	GG	GG	TT	TT	GG	TT	TT	GG	TT	TT	TT	TT	TT	GG	TT	TT	GG	TT	GG	GG
AX-95684859	1B	655781604	G/A	GG	AA	GG	GG	GG	GG	GG	AA	AA	GG	GG	GG	AA	GG	GG	AA	GG	GG	GG	GG	GG	GG	GG	GG	GG	GG	GG	GG	GG	GG	GG	GG	GG	GG	GG	GG	GG	GG	GG	GG	GG	GG	AA	GG	GG	GG
AX-95630094	1B	655798521	A/G	AA	GG	AA	AA	AA	AA	AA	GG	GG	AA	AA	AA	GG	AA	GG	GG	AA	AA	AA	AA	AA	GG	AA	AA	AA	GG	AA	AA	AA	AA	AA	AA	AA	AA	AA	GG	AA	AA	AA	AA	AA	AA	GG	AA	AA	AA
AX-95005246	1B	655847909	A/G	AA	GG	AA	AA	AA	AA	AA	GG	GG	AA	AA	AA	GG	AA	GG	GG	AA	AA	AA	AA	AA	GG	AA	AA	AA	NN	AA	AA	AA	AA	AA	AA	AA	AA	AA	GG	AA	AA	AA	AA	AA	AA	GG	AA	AA	AA
AX-94510581	1B	656658155	C/G	CC	GG	CC	CC	CC	CC	CC	GG	GG	CC	CC	CC	GG	CC	GG	GG	GG	CC	CC	CC	GG	GG	CC	CC	CC	GG	GG	GG	CC	CC	GG	CC	CC	GG	CC	GG	CC	CC	CC	GG	CC	CC	GG	CC	GG	GG
AX-94400616	1B	656680009	A/G	AA	GG	AA	AA	AA	AA	AA	AA	AA	AA	AA	AA	AA	AA	GG	AA	GG	AA	AA	AA	GG	GG	AA	AA	AA	GG	GG	GG	AA	AA	GG	AA	AA	GG	AA	GG	AA	AA	AA	GG	AA	AA	GG	AA	GG	GG
AX-94810129	1B	658423282	T/G	TT	GG	TT	TT	GG	TT	GG	TT	GG	GG	TT	GG	GG	TT	TT	TT	TT	TT	TT	GG	TT	GG	TT	TT	TT	GG	GG	GG	TT	TT	TT	TT	TT	TT	GG	TT	TT	TT	TT	TT	TT	TT	TT	GG	TT	TT
AX-94607442	1B	658531504	C/T	CC	TT	CC	CC	CC	CC	CC	CC	CC	CC	CC	CC	CC	CC	CC	CC	TT	CC	CC	CC	TT	CC	CC	CC	CC	CC	TT	TT	CC	CC	TT	CC	CC	CC	CC	CC	CC	TT	CC	TT	CC	CC	TT	CC	TT	CC
AX-94812304	1B	660736345	T/C	TT	TT	TT	TT	TT	TT	TT	CC	TT	TT	TT	TT	TT	TT	CC	TT	TT	TT	TT	TT	CC	TT	TT	TT	TT	TT	TT	TT	TT	TT	CC	TT	TT	TT	TT	TT	TT	CC	TT	TT	TT	TT	TT	TT	CC	TT
AX-94434091	1B	662068985	A/G	AA	AA	AA	AA	AA	AA	AA	AA	GG	AA	AA	AA	AA	AA	AA	GG	AA	AA	GG	AA	GG	AA	AA	GG	AA	AA	NN	GG	AA	AA	GG	AA	AA	GG	AA	AA	AA	AA	AA	AA	AA	AA	AA	AA	GG	GG
AX-95124696	1B	662556105	A/G	AA	AA	GG	AA	GG	AA	GG	AA	GG	AA	GG	AA	AA	GG	AA	AA	GG	GG	AA	AA	GG	GG	AA	GG	AA	GG	AA	GG	GG	GG	GG	GG	AA	GG	GG	GG	GG	GG	AA	GG	AA	GG	AA	AA	GG	GG
AX-94700179	1B	662718671	G/A	GG	GG	AA	GG	AA	GG	AA	GG	GG	GG	AA	GG	GG	GG	GG	GG	AA	AA	GG	GG	AA	AA	GG	AA	GG	AA	GG	AA	AA	AA	AA	AA	GG	GG	AA	AA	AA	AA	GG	AA	GG	AA	GG	GG	AA	GG
AX-94604435	1B	664787778	G/A	GG	AA	GG	GG	GG	GG	GG	GG	GG	GG	GG	GG	GG	AA	GG	GG	GG	GG	GG	GG	GG	GG	GG	GG	GG	GG	AA	GG	GG	GG	GG	GG	GG	AA	GG	GG	GG	GG	GG	GG	GG	GG	AA	GG	GG	AA
AX-94935688	1B	666004007	C/A	AA	CC	AA	AA	AA	AA	AA	CC	AA	AA	CC	AA	CC	CC	CC	AA	AA	AA	CC	CC	CC	CC	CC	AA	CC	CC	AA	AA	AA	CC	CC	AA	AA	AA	CC	CC	CC	CC	AA	CC	AA	CC	CC	AA	CC	AA
AX-95139868	1B	666917453	A/G	AA	GG	AA	AA	AA	AA	AA	AA	GG	GG	AA	AA	GG	AA	AA	GG	AA	GG	AA	AA	GG	AA	AA	GG	AA	GG	NN	AA	GG	AA	GG	GG	AA	GG	GG	GG	GG	GG	AA	GG	AA	AA	GG	AA	GG	GG
AX-94881194	1B	668675994	A/T	AA	AA	AA	TT	AA	AA	AA	AA	AA	TT	AA	AA	AA	AA	AA	AA	TT	AA	AA	TT	TT	TT	AA	TT	AA	TT	AA	TT	AA	TT	AA	TT	AA	AA	TT	TT	TT	TT	TT	TT	TT	TT	AA	TT	TT	AA
AX-94522424	1B	670783705	G/C	GG	GG	GG	CC	GG	GG	GG	GG	GG	CC	GG	GG	GG	GG	GG	GG	CC	GG	GG	GG	GG	GG	GG	GG	GG	GG	GG	CC	GG	GG	GG	GG	GG	CC	GG	GG	GG	GG	CC	GG	GG	GG	GG	CC	GG	CC
AX-94720629	1B	671259755	C/T	CC	CC	CC	CC	CC	CC	CC	CC	CC	CC	CC	TT	CC	CC	CC	CC	CC	TT	CC	TT	TT	TT	CC	TT	CC	TT	CC	CC	CC	TT	CC	TT	CC	CC	TT	TT	TT	TT	CC	TT	CC	TT	CC	CC	TT	CC
AX-94956073	1B	673640917	G/A	GG	GG	AA	GG	AA	GG	AA	GG	GG	GG	AA	AA	GG	GG	GG	GG	GG	AA	GG	AA	AA	AA	GG	GG	GG	AA	GG	GG	GG	AA	GG	AA	GG	GG	AA	AA	AA	AA	GG	AA	GG	AA	GG	GG	AA	GG
AX-94570573	1B	673743614	G/C	CC	CC	CC	GG	CC	CC	CC	CC	CC	CC	CC	GG	CC	CC	CC	CC	GG	GG	CC	GG	GG	GG	CC	CC	CC	GG	CC	GG	CC	GG	CC	GG	CC	GG	GG	GG	GG	GG	GG	GG	CC	GG	CC	GG	GG	GG
AX-95179433	1B	674471701	C/T	TT	TT	CC	TT	CC	CC	CC	CC	CC	TT	CC	CC	TT	CC	CC	TT	TT	CC	CC	CC	CC	CC	CC	CC	CC	CC	CC	TT	CC	CC	CC	CC	CC	TT	CC	CC	CC	CC	TT	CC	CC	CC	TT	TT	CC	TT
AX-95087092	1B	674631837	C/T	CC	CC	TT	CC	TT	TT	TT	TT	CC	CC	TT	CC	CC	TT	TT	CC	CC	CC	TT	CC	CC	CC	TT	TT	TT	CC	CC	CC	TT	CC	TT	CC	CC	CC	CC	CC	CC	CC	CC	CC	CC	CC	CC	CC	CC	CC
AX-94710302	1B	674807901	G/A	GG	GG	GG	AA	GG	GG	GG	GG	AA	AA	GG	GG	GG	GG	GG	GG	AA	GG	GG	GG	AA	AA	GG	GG	GG	AA	AA	AA	GG	AA	GG	AA	GG	AA	AA	AA	AA	AA	GG	AA	GG	AA	GG	AA	AA	AA
AX-94538363	1B	675227116	C/G	GG	GG	GG	CC	NN	GG	GG	GG	CC	CC	GG	GG	GG	GG	GG	GG	CC	GG	GG	GG	CC	CC	GG	GG	GG	CC	CC	CC	GG	CC	GG	CC	GG	CC	CC	CC	CC	CC	GG	CC	GG	CC	GG	CC	CC	CC
AX-94534468	1B	676068158	G/A	GG	GG	AA	GG	AA	AA	AA	AA	GG	GG	AA	GG	GG	AA	AA	GG	GG	GG	AA	GG	AA	GG	AA	AA	GG	AA	GG	GG	AA	AA	AA	AA	GG	GG	GG	AA	GG	AA	GG	AA	GG	AA	AA	GG	AA	GG
AX-95143791	1B	677093317	T/C	TT	TT	TT	CC	TT	TT	NN	TT	CC	CC	TT	CC	TT	TT	TT	TT	CC	CC	TT	CC	TT	CC	TT	TT	CC	TT	CC	TT	TT	TT	TT	TT	CC	CC	CC	NN	CC	TT	CC	TT	CC	TT	TT	CC	TT	CC
AX-95101661	1B	677987216	T/C	TT	CC	TT	TT	CC	TT	CC	TT	TT	TT	TT	TT	CC	TT	TT	CC	TT	TT	TT	TT	TT	TT	TT	TT	TT	TT	TT	CC	TT	TT	TT	TT	TT	TT	TT	TT	TT	TT	TT	TT	TT	TT	CC	TT	TT	TT
AX-94592638	1B	678266710	A/G	AA	AA	AA	GG	AA	AA	AA	AA	AA	GG	AA	GG	GG	AA	AA	AA	GG	GG	AA	GG	AA	GG	AA	AA	GG	AA	AA	GG	AA	AA	AA	AA	GG	GG	GG	AA	GG	AA	AA	AA	GG	AA	AA	GG	AA	GG
AX-95202607	1B	678469943	A/G	GG	GG	AA	AA	AA	AA	AA	AA	GG	AA	AA	AA	AA	AA	AA	GG	AA	AA	AA	AA	GG	AA	AA	AA	AA	AA	GG	AA	AA	AA	AA	GG	AA	AA	AA	GG	AA	GG	GG	GG	AA	GG	AA	AA	GG	AA
AX-94435033	1B	678845128	G/C	GG	GG	GG	CC	GG	GG	GG	GG	GG	CC	GG	CC	CC	GG	GG	GG	CC	CC	GG	CC	GG	CC	GG	GG	CC	GG	GG	CC	GG	GG	GG	GG	CC	CC	CC	GG	CC	GG	GG	GG	CC	GG	GG	CC	GG	CC
AX-94857844	1B	679748693	C/T	CC	CC	TT	CC	TT	TT	TT	TT	CC	CC	TT	CC	CC	TT	TT	CC	CC	CC	TT	CC	CC	CC	TT	TT	CC	TT	CC	CC	TT	TT	TT	CC	CC	CC	CC	CC	CC	CC	CC	CC	CC	CC	TT	CC	CC	CC
AX-94867479	1B	686853629	A/G	AA	GG	AA	AA	GG	AA	GG	AA	AA	AA	AA	AA	GG	AA	AA	GG	AA	AA	AA	AA	AA	AA	AA	AA	AA	AA	AA	GG	AA	AA	AA	AA	AA	AA	AA	AA	AA	AA	AA	AA	AA	AA	GG	AA	AA	AA
AX-94572205	1D	85116	A/G	GG	GG	GG	AA	GG	AA	GG	GG	AA	GG	GG	GG	AA	AA	AA	AA	AA	AA	AA	AA	AA	AA	AA	AA	AA	AA	AA	AA	AA	AA	AA	AA	GG	AA	AA	AA	GG	AA	GG	AA	AA	GG	GG	AA	AA	AA
AX-94443821	1D	552373	T/C	TT	TT	TT	TT	TT	TT	TT	CC	TT	TT	TT	TT	TT	TT	CC	TT	TT	TT	TT	TT	CC	TT	TT	TT	TT	TT	TT	NN	TT	TT	CC	TT	TT	TT	TT	TT	TT	CC	TT	TT	TT	TT	TT	TT	CC	TT
AX-94709608	1D	2077136	C/A	CC	CC	AA	CC	AA	CC	AA	AA	CC	AA	AA	CC	AA	AA	AA	CC	AA	AA	AA	CC	AA	CC	CC	CC	CC	CC	CC	AA	CC	CC	AA	AA	CC	AA	CC	AA	AA	CC	AA	AA	CC	AA	AA	CC	AA	AA
AX-94482484	1D	2219192	G/A	GG	GG	AA	GG	AA	GG	AA	GG	GG	AA	AA	GG	AA	AA	GG	GG	AA	AA	AA	GG	GG	GG	GG	GG	GG	GG	GG	AA	GG	GG	GG	AA	GG	AA	GG	AA	AA	GG	AA	AA	GG	AA	AA	GG	GG	AA
AX-94784539	1D	5247596	A/C	CC	CC	CC	AA	CC	AA	CC	CC	AA	CC	CC	CC	AA	AA	AA	AA	AA	AA	AA	AA	AA	AA	AA	AA	AA	AA	AA	AA	AA	AA	AA	AA	CC	AA	AA	AA	CC	AA	CC	AA	AA	CC	CC	AA	AA	AA
AX-94806913	1D	5448902	C/T	CC	CC	CC	CC	CC	CC	CC	CC	TT	CC	CC	CC	CC	CC	CC	CC	CC	CC	CC	CC	TT	CC	TT	CC	TT	CC	TT	CC	CC	CC	CC	CC	CC	CC	CC	CC	CC	CC	CC	CC	CC	CC	CC	CC	CC	CC
AX-95172623	1D	6541806	C/T	CC	CC	CC	CC	CC	CC	CC	TT	CC	CC	CC	CC	CC	CC	TT	CC	CC	CC	CC	CC	TT	CC	CC	CC	CC	CC	CC	CC	CC	CC	TT	CC	CC	CC	CC	CC	CC	TT	CC	CC	CC	CC	CC	CC	TT	CC
AX-94705061	1D	7056940	C/T	CC	CC	CC	CC	CC	CC	CC	CC	TT	CC	TT	CC	CC	CC	CC	TT	CC	CC	CC	TT	TT	TT	CC	TT	CC	TT	TT	CC	TT	TT	CC	CC	CC	CC	TT	TT	TT	TT	CC	TT	CC	CC	CC	CC	CC	CC
AX-95215584	1D	7211864	T/A	TT	AA	TT	TT	TT	TT	TT	TT	TT	TT	AA	TT	TT	TT	TT	NN	TT	AA	TT	AA	TT	AA	TT	AA	TT	AA	TT	TT	AA	AA	TT	TT	TT	TT	AA	NN	AA	AA	TT	AA	TT	TT	AA	NN	TT	TT
AX-94472136	1D	7822466	C/G	CC	GG	CC	CC	GG	CC	GG	CC	CC	CC	CC	CC	GG	CC	CC	GG	CC	CC	CC	CC	CC	CC	CC	CC	CC	CC	CC	GG	CC	CC	CC	CC	CC	CC	CC	CC	CC	CC	CC	CC	CC	CC	GG	CC	CC	CC
AX-94387560	1D	8183411	T/C	TT	TT	CC	CC	CC	CC	CC	TT	TT	CC	TT	CC	TT	CC	TT	TT	CC	CC	TT	TT	TT	TT	CC	TT	CC	TT	TT	TT	TT	TT	TT	CC	CC	CC	TT	TT	TT	TT	CC	TT	CC	CC	TT	CC	TT	CC
AX-94423519	1D	8605830	A/T	AA	AA	AA	AA	AA	AA	AA	AA	TT	AA	TT	AA	AA	AA	AA	AA	AA	TT	AA	TT	AA	TT	TT	TT	TT	TT	TT	AA	TT	TT	AA	AA	AA	AA	TT	TT	TT	AA	AA	TT	AA	AA	AA	TT	AA	AA
AX-94600322	1D	9799706	A/T	AA	TT	AA	AA	AA	TT	AA	AA	AA	TT	AA	AA	AA	AA	AA	TT	AA	AA	AA	TT	AA	TT	AA	TT	AA	TT	AA	AA	TT	AA	AA	AA	AA	AA	TT	AA	AA	AA	TT	AA	AA	AA	AA	TT	AA	AA
AX-94459663	1D	10025742	C/T	CC	CC	TT	TT	TT	CC	TT	CC	CC	TT	TT	CC	TT	TT	CC	CC	TT	CC	TT	CC	CC	CC	TT	CC	CC	CC	CC	NN	CC	TT	CC	TT	CC	TT	CC	CC	CC	CC	TT	TT	CC	TT	TT	CC	CC	CC
AX-94685643	1D	10666774	C/T	TT	TT	CC	CC	CC	TT	CC	CC	CC	CC	CC	TT	CC	CC	CC	TT	CC	TT	CC	TT	TT	TT	CC	TT	CC	TT	CC	CC	TT	CC	CC	CC	TT	CC	TT	TT	CC	CC	CC	CC	TT	CC	CC	TT	CC	CC
AX-94758477	1D	10720079	C/G	GG	GG	CC	CC	CC	GG	CC	CC	GG	CC	CC	GG	CC	CC	CC	GG	CC	GG	CC	GG	GG	GG	CC	GG	CC	GG	GG	GG	GG	CC	CC	CC	GG	CC	GG	GG	CC	CC	CC	CC	GG	CC	CC	GG	CC	CC
AX-94538776	1D	10935849	C/T	CC	CC	CC	CC	CC	CC	CC	CC	TT	CC	CC	CC	CC	CC	CC	CC	CC	TT	CC	TT	CC	TT	CC	TT	CC	TT	TT	CC	TT	CC	CC	CC	CC	CC	TT	TT	CC	CC	CC	CC	CC	CC	CC	TT	CC	CC
AX-94903927	1D	11124363	T/G	TT	TT	GG	TT	GG	GG	GG	TT	NN	TT	TT	GG	TT	GG	TT	TT	GG	GG	TT	GG	NN	GG	GG	TT	GG	GG	TT	TT	TT	GG	TT	TT	GG	TT	GG	GG	GG	TT	TT	TT	GG	GG	TT	TT	TT	GG
AX-95237514	1D	11498246	A/G	AA	AA	GG	GG	GG	AA	GG	AA	AA	GG	GG	AA	GG	GG	AA	AA	GG	AA	GG	AA	AA	AA	GG	AA	AA	AA	AA	GG	AA	GG	AA	GG	AA	GG	AA	AA	GG	AA	GG	GG	AA	GG	GG	AA	NN	AA
AX-95087025	1D	11622965	T/C	TT	TT	CC	CC	CC	TT	CC	CC	TT	CC	CC	TT	CC	CC	CC	TT	CC	TT	CC	TT	CC	TT	CC	TT	TT	TT	NN	CC	TT	CC	CC	CC	TT	CC	TT	TT	CC	CC	CC	CC	TT	CC	CC	TT	CC	TT
AX-94870458	1D	11623274	T/C	CC	CC	TT	TT	TT	CC	TT	TT	TT	TT	TT	CC	TT	TT	TT	CC	TT	TT	TT	CC	TT	CC	TT	CC	CC	CC	TT	TT	TT	TT	TT	TT	CC	TT	CC	CC	TT	TT	TT	TT	CC	TT	TT	CC	TT	CC
AX-94386053	1D	11854009	G/A	GG	AA	GG	GG	GG	AA	GG	GG	AA	GG	GG	GG	GG	GG	GG	AA	GG	GG	GG	AA	AA	AA	GG	AA	AA	AA	AA	NN	AA	GG	GG	GG	AA	GG	AA	AA	GG	GG	GG	GG	AA	GG	GG	AA	GG	GG
AX-95248807	1D	11967999	G/A	GG	GG	GG	GG	GG	GG	GG	GG	AA	GG	GG	GG	GG	GG	GG	GG	GG	AA	GG	GG	AA	GG	AA	GG	GG	GG	AA	GG	AA	GG	GG	GG	GG	GG	GG	GG	AA	GG	GG	GG	GG	GG	GG	GG	GG	GG
AX-94787647	1D	12312862	A/C	AA	AA	AA	AA	AA	AA	AA	CC	AA	AA	AA	AA	AA	AA	CC	AA	AA	AA	AA	AA	AA	AA	AA	AA	AA	AA	AA	AA	AA	AA	CC	AA	AA	AA	AA	AA	AA	CC	AA	AA	AA	AA	AA	AA	CC	AA
AX-94569436	1D	14479312	G/A	GG	GG	GG	GG	GG	GG	GG	GG	GG	GG	GG	GG	GG	GG	GG	GG	GG	GG	GG	AA	GG	AA	GG	GG	GG	AA	GG	GG	GG	GG	GG	GG	GG	GG	AA	AA	AA	GG	GG	GG	GG	GG	GG	GG	GG	GG
AX-94761228	1D	15363312	A/G	AA	AA	AA	AA	AA	AA	AA	GG	AA	AA	AA	AA	AA	AA	GG	AA	AA	AA	AA	AA	GG	AA	AA	AA	AA	AA	AA	AA	AA	AA	GG	AA	AA	AA	AA	AA	AA	GG	AA	AA	AA	AA	AA	AA	GG	AA
AX-94874878	1D	17013029	C/G	CC	GG	CC	CC	CC	CC	CC	CC	GG	CC	CC	CC	CC	CC	CC	GG	CC	CC	CC	CC	CC	CC	CC	CC	CC	CC	GG	CC	GG	CC	CC	GG	CC	CC	CC	CC	CC	CC	CC	GG	CC	CC	CC	CC	CC	CC
AX-94990862	1D	19128274	C/T	CC	TT	CC	TT	CC	CC	CC	CC	TT	CC	CC	CC	TT	CC	CC	CC	TT	TT	CC	CC	CC	CC	CC	CC	TT	CC	TT	TT	CC	CC	CC	TT	CC	CC	CC	TT	CC	CC	CC	CC	CC	CC	CC	CC	CC	TT
AX-94725097	1D	19267042	C/T	TT	CC	CC	CC	CC	TT	CC	CC	CC	CC	CC	CC	CC	CC	CC	TT	CC	CC	CC	TT	CC	TT	CC	TT	CC	TT	CC	CC	TT	CC	CC	CC	TT	CC	TT	CC	CC	TT	CC	TT	TT	CC	CC	TT	CC	CC
AX-94713758	1D	19344157	G/A	GG	GG	GG	GG	GG	GG	GG	AA	GG	GG	GG	GG	GG	GG	AA	GG	GG	GG	GG	GG	AA	GG	GG	GG	GG	GG	GG	GG	GG	GG	AA	GG	GG	GG	GG	GG	GG	AA	GG	GG	GG	GG	GG	GG	AA	GG
AX-94693694	1D	20517502	C/T	CC	TT	CC	CC	TT	CC	CC	TT	TT	TT	CC	TT	CC	TT	CC	CC	CC	TT	CC	CC	CC	CC	TT	CC	TT	CC	TT	CC	CC	CC	CC	TT	CC	CC	CC	TT	CC	CC	CC	CC	CC	CC	TT	CC	TT	TT
AX-94567354	1D	25139614	A/G	GG	GG	GG	AA	AA	AA	AA	AA	GG	AA	GG	GG	AA	AA	GG	AA	AA	AA	GG	AA	GG	AA	GG	AA	GG	AA	GG	AA	AA	GG	GG	AA	AA	AA	AA	AA	AA	AA	AA	AA	AA	GG	AA	AA	GG	AA
AX-95208526	1D	28167227	T/C	TT	TT	TT	TT	TT	TT	TT	TT	TT	TT	TT	TT	TT	TT	TT	TT	TT	TT	TT	CC	TT	TT	TT	CC	TT	CC	TT	TT	TT	TT	TT	TT	TT	TT	CC	TT	TT	CC	TT	TT	TT	TT	TT	TT	TT	TT
AX-94784220	1D	28818767	C/A	CC	CC	CC	CC	CC	CC	CC	AA	CC	CC	CC	CC	CC	CC	NN	CC	CC	CC	CC	NN	AA	CC	CC	AA	CC	AA	CC	CC	CC	CC	AA	CC	CC	CC	AA	CC	CC	AA	CC	CC	CC	CC	CC	CC	NN	CC
AX-94450337	1D	31057109	C/T	CC	CC	CC	CC	CC	CC	CC	CC	CC	CC	CC	CC	CC	CC	CC	CC	CC	CC	CC	TT	CC	CC	CC	TT	CC	TT	CC	CC	CC	CC	CC	CC	CC	CC	TT	CC	CC	TT	CC	CC	CC	CC	CC	CC	CC	CC
AX-94518519	1D	31430622	G/A	GG	GG	GG	GG	GG	GG	GG	AA	GG	GG	GG	GG	GG	GG	AA	GG	GG	GG	GG	GG	AA	GG	GG	GG	GG	GG	GG	GG	GG	GG	AA	GG	GG	GG	GG	GG	GG	AA	GG	GG	GG	GG	GG	GG	AA	GG
AX-94401187	1D	31691634	C/G	GG	GG	CC	CC	CC	CC	CC	CC	CC	CC	CC	GG	CC	CC	CC	CC	CC	CC	CC	GG	CC	CC	CC	GG	CC	GG	CC	CC	CC	CC	CC	CC	CC	CC	GG	CC	CC	GG	CC	CC	CC	CC	CC	CC	CC	CC
AX-94431463	1D	33473047	A/G	GG	AA	AA	AA	AA	GG	AA	GG	AA	GG	AA	GG	AA	GG	AA	AA	AA	AA	AA	GG	AA	AA	AA	GG	AA	GG	AA	AA	AA	AA	AA	AA	GG	AA	GG	AA	GG	GG	GG	AA	GG	AA	GG	AA	AA	AA
AX-94444583	1D	34619164	A/G	AA	AA	AA	AA	AA	GG	AA	GG	AA	GG	AA	AA	AA	GG	AA	AA	AA	AA	AA	GG	AA	AA	AA	GG	AA	GG	AA	AA	AA	AA	AA	AA	GG	AA	GG	AA	GG	GG	GG	AA	GG	AA	GG	AA	AA	AA
AX-95013700	1D	34626255	C/T	CC	CC	CC	CC	CC	TT	CC	TT	CC	TT	CC	CC	CC	TT	CC	CC	CC	CC	CC	TT	CC	CC	CC	TT	CC	TT	CC	CC	CC	CC	CC	CC	TT	CC	TT	CC	TT	TT	TT	CC	TT	CC	TT	CC	CC	CC
AX-94939596	1D	38781516	A/C	AA	AA	AA	AA	CC	CC	CC	CC	AA	CC	AA	AA	AA	CC	AA	AA	AA	AA	AA	AA	AA	AA	AA	AA	AA	AA	AA	AA	AA	AA	AA	CC	CC	CC	AA	AA	CC	AA	CC	AA	CC	AA	CC	CC	AA	AA
AX-94646709	1D	38908559	A/C	CC	AA	CC	AA	AA	AA	AA	AA	CC	AA	CC	CC	AA	AA	CC	AA	AA	AA	CC	AA	CC	AA	CC	AA	CC	AA	CC	NN	NN	CC	CC	NN	AA	AA	NN	AA	AA	AA	AA	AA	AA	CC	AA	AA	CC	AA
AX-94727697	1D	41593814	G/A	AA	AA	AA	GG	GG	GG	GG	AA	AA	GG	AA	AA	GG	GG	AA	GG	GG	GG	AA	GG	AA	GG	AA	GG	AA	GG	AA	GG	GG	AA	AA	GG	GG	GG	GG	GG	GG	NN	GG	GG	GG	AA	GG	GG	AA	GG
AX-94613089	1D	41751224	C/T	CC	CC	CC	CC	CC	CC	CC	TT	CC	CC	CC	CC	CC	CC	TT	CC	CC	CC	CC	CC	TT	CC	CC	CC	CC	CC	CC	CC	CC	CC	TT	CC	CC	CC	CC	CC	CC	TT	CC	CC	CC	CC	CC	CC	TT	CC
AX-95115596	1D	41751821	T/C	CC	CC	CC	TT	TT	TT	TT	TT	CC	TT	CC	CC	TT	TT	CC	TT	TT	TT	CC	TT	CC	TT	CC	TT	CC	TT	CC	TT	TT	CC	CC	TT	TT	TT	TT	TT	TT	TT	TT	TT	TT	CC	TT	TT	CC	TT
AX-94576133	1D	41827116	A/G	GG	AA	GG	AA	AA	AA	AA	AA	AA	AA	GG	AA	AA	AA	GG	AA	AA	AA	GG	AA	GG	AA	AA	AA	AA	AA	GG	NN	AA	GG	GG	AA	AA	AA	AA	AA	AA	AA	AA	AA	AA	GG	AA	AA	GG	AA
AX-94458022	1D	42845340	T/C	CC	CC	TT	TT	TT	TT	TT	TT	CC	TT	CC	CC	TT	TT	TT	TT	TT	TT	CC	TT	TT	TT	CC	TT	CC	TT	CC	TT	TT	TT	TT	TT	TT	TT	TT	TT	TT	TT	TT	TT	TT	TT	TT	TT	TT	TT
AX-95133041	1D	48398838	A/G	AA	AA	AA	AA	AA	AA	AA	GG	AA	AA	AA	AA	AA	AA	GG	AA	AA	AA	AA	AA	GG	AA	AA	AA	AA	AA	AA	AA	AA	AA	GG	AA	AA	AA	AA	AA	AA	GG	AA	AA	AA	AA	AA	AA	GG	AA
AX-95020470	1D	48864115	A/G	AA	AA	AA	AA	AA	AA	AA	GG	AA	AA	AA	AA	AA	AA	AA	GG	NN	AA	AA	GG	AA	GG	AA	AA	AA	GG	AA	AA	GG	AA	AA	AA	AA	GG	GG	GG	GG	GG	AA	GG	AA	AA	AA	AA	AA	AA
AX-95630013	1D	49586410	A/G	GG	GG	GG	AA	AA	AA	AA	AA	GG	AA	GG	GG	AA	AA	GG	AA	AA	AA	GG	AA	GG	AA	GG	AA	GG	AA	GG	AA	AA	GG	GG	AA	AA	AA	AA	AA	AA	AA	AA	AA	AA	GG	AA	AA	GG	AA
AX-95074753	1D	50193898	T/C	TT	TT	TT	TT	TT	TT	TT	CC	TT	TT	TT	TT	TT	TT	CC	TT	TT	TT	TT	TT	CC	TT	TT	TT	TT	TT	TT	TT	TT	TT	CC	TT	TT	TT	TT	TT	TT	CC	TT	TT	TT	TT	TT	TT	CC	TT
AX-95139521	1D	52575187	G/A	GG	GG	AA	GG	GG	GG	GG	GG	GG	GG	AA	GG	GG	GG	AA	GG	GG	GG	AA	GG	AA	GG	GG	GG	GG	GG	GG	GG	GG	AA	AA	GG	GG	GG	GG	GG	GG	GG	GG	GG	GG	AA	GG	GG	AA	GG
AX-95126592	1D	55208863	C/A	AA	AA	AA	CC	CC	CC	CC	CC	AA	CC	AA	AA	CC	CC	AA	CC	CC	CC	AA	CC	AA	CC	AA	CC	AA	CC	AA	CC	CC	AA	AA	CC	CC	CC	CC	CC	CC	CC	CC	CC	CC	AA	CC	CC	AA	CC
AX-94708824	1D	55669040	G/A	AA	AA	GG	GG	GG	GG	GG	GG	AA	GG	GG	AA	GG	GG	GG	GG	GG	GG	GG	GG	GG	GG	AA	GG	AA	GG	AA	GG	GG	GG	GG	GG	GG	GG	GG	GG	GG	GG	GG	GG	GG	GG	GG	GG	GG	GG
AX-94499781	1D	58450958	C/T	CC	CC	CC	CC	CC	CC	CC	TT	CC	CC	CC	CC	CC	CC	TT	CC	CC	CC	CC	CC	TT	CC	CC	CC	CC	CC	CC	CC	CC	CC	TT	NN	CC	CC	CC	CC	CC	TT	CC	CC	CC	CC	CC	CC	TT	CC
AX-94580736	1D	60432566	A/G	AA	GG	GG	AA	GG	AA	GG	AA	AA	AA	AA	AA	AA	AA	AA	AA	AA	GG	AA	GG	AA	AA	GG	AA	AA	AA	AA	AA	AA	GG	AA	AA	AA	GG	AA	AA	AA	AA	GG	AA	AA	AA	AA	AA	AA	GG
AX-94463504	1D	71287036	C/A	CC	CC	CC	CC	CC	CC	CC	AA	CC	CC	CC	CC	CC	CC	AA	CC	CC	CC	CC	CC	AA	CC	CC	CC	CC	CC	CC	CC	CC	CC	AA	CC	CC	CC	CC	CC	CC	AA	CC	CC	CC	CC	CC	CC	AA	CC
AX-94491903	1D	73679301	C/T	TT	CC	TT	CC	CC	CC	CC	CC	TT	CC	TT	TT	CC	CC	TT	CC	CC	CC	TT	CC	TT	CC	TT	CC	TT	CC	TT	CC	CC	TT	TT	CC	CC	CC	CC	CC	CC	CC	CC	CC	CC	TT	CC	CC	TT	CC
AX-95097638	1D	77364307	G/A	GG	AA	GG	GG	GG	GG	GG	AA	GG	GG	GG	GG	AA	GG	AA	GG	GG	GG	GG	GG	AA	GG	GG	GG	GG	GG	GG	GG	GG	GG	AA	GG	GG	GG	GG	GG	GG	AA	GG	GG	GG	GG	AA	GG	AA	GG
AX-94857942	1D	86924162	A/G	AA	AA	AA	AA	GG	GG	GG	GG	AA	GG	AA	AA	AA	GG	AA	AA	AA	AA	AA	AA	AA	AA	AA	AA	AA	AA	NN	AA	AA	AA	AA	AA	GG	GG	AA	AA	GG	AA	GG	AA	GG	AA	GG	AA	AA	AA
AX-94547888	1D	90622836	A/C	AA	CC	AA	CC	CC	AA	CC	CC	CC	CC	AA	CC	AA	CC	AA	CC	AA	AA	AA	AA	AA	CC	AA	AA	AA	AA	CC	AA	CC	AA	AA	CC	AA	CC	AA	CC	AA	AA	CC	AA	CC	AA	CC	CC	AA	CC
AX-94457895	1D	95560867	A/C	AA	AA	AA	AA	AA	AA	AA	CC	AA	AA	AA	AA	AA	AA	CC	AA	AA	AA	AA	AA	CC	AA	AA	AA	AA	AA	AA	AA	AA	AA	CC	AA	AA	AA	AA	AA	AA	CC	AA	AA	AA	AA	AA	AA	CC	AA
AX-94466473	1D	97533112	A/G	AA	GG	AA	AA	GG	GG	GG	GG	AA	GG	AA	AA	AA	GG	AA	GG	AA	AA	AA	AA	AA	AA	AA	AA	AA	AA	AA	AA	GG	AA	AA	AA	GG	GG	AA	AA	GG	AA	GG	GG	GG	AA	GG	AA	AA	AA
AX-94780586	1D	103260237	A/C	AA	AA	AA	AA	AA	CC	AA	AA	AA	CC	AA	AA	AA	CC	AA	AA	AA	AA	AA	AA	AA	AA	CC	AA	AA	AA	AA	AA	AA	AA	CC	CC	AA	AA	AA	AA	AA	AA	AA	CC	AA	AA	AA	AA	CC	AA
AX-94629635	1D	107503370	G/A	GG	GG	GG	GG	AA	AA	AA	AA	GG	AA	GG	GG	GG	AA	GG	GG	GG	GG	GG	GG	GG	GG	GG	GG	GG	GG	GG	GG	GG	GG	GG	GG	AA	AA	GG	GG	AA	GG	AA	GG	AA	GG	AA	GG	GG	GG
AX-94723177	1D	148681169	T/C	TT	TT	TT	TT	TT	TT	TT	CC	TT	TT	TT	TT	TT	TT	CC	TT	TT	TT	TT	TT	CC	TT	TT	TT	TT	TT	TT	NN	TT	TT	CC	TT	TT	TT	TT	TT	TT	CC	TT	TT	TT	TT	TT	TT	CC	TT
AX-94681510	1D	156284774	G/T	GG	GG	TT	TT	TT	GG	TT	TT	GG	TT	TT	GG	TT	TT	TT	GG	TT	GG	TT	GG	GG	GG	TT	GG	GG	GG	GG	TT	GG	TT	TT	TT	GG	TT	GG	GG	TT	TT	TT	TT	GG	TT	TT	GG	TT	GG
AX-94961810	1D	159986006	G/A	GG	GG	GG	GG	GG	GG	GG	GG	GG	GG	GG	GG	AA	GG	GG	AA	GG	GG	GG	GG	GG	GG	GG	AA	GG	AA	GG	GG	GG	GG	GG	AA	GG	GG	AA	AA	GG	GG	GG	AA	GG	GG	GG	AA	GG	GG
AX-94816027	1D	160448705	A/G	AA	GG	NN	AA	AA	AA	GG	AA	GG	AA	GG	AA	AA	AA	AA	AA	AA	AA	AA	AA	AA	AA	AA	AA	AA	AA	AA	AA	GG	GG	AA	AA	AA	AA	AA	AA	AA	AA	GG	AA	AA	AA	GG	AA	AA	AA
AX-94433426	1D	162061456	C/A	CC	AA	CC	CC	AA	NN	AA	AA	CC	AA	CC	CC	CC	AA	CC	AA	CC	CC	CC	CC	CC	CC	CC	CC	CC	CC	CC	CC	AA	CC	CC	CC	AA	AA	CC	CC	AA	CC	AA	AA	AA	CC	AA	CC	CC	CC
AX-94447203	1D	178465277	A/G	AA	AA	AA	AA	AA	AA	AA	GG	AA	AA	AA	AA	AA	AA	GG	AA	AA	AA	AA	AA	GG	AA	AA	AA	AA	AA	AA	AA	AA	AA	GG	AA	AA	AA	AA	AA	AA	GG	AA	AA	AA	AA	AA	AA	GG	AA
AX-94707483	1D	199595645	C/T	CC	CC	CC	CC	TT	TT	TT	TT	CC	CC	CC	TT	CC	CC	TT	CC	CC	TT	CC	CC	TT	CC	TT	CC	CC	CC	CC	CC	CC	TT	TT	CC	TT	CC	CC	CC	CC	TT	CC	CC	TT	TT	CC	CC	TT	CC
AX-95234839	1D	199672470	T/G	TT	GG	TT	TT	GG	GG	GG	GG	TT	TT	TT	GG	GG	TT	GG	TT	TT	GG	TT	TT	GG	TT	GG	TT	TT	TT	TT	TT	TT	GG	GG	TT	GG	TT	TT	TT	TT	GG	TT	TT	GG	GG	GG	TT	GG	TT
AX-95216172	1D	203750558	C/G	CC	CC	CC	CC	GG	GG	GG	GG	CC	GG	CC	CC	CC	GG	CC	CC	CC	CC	CC	CC	CC	CC	CC	CC	CC	CC	CC	CC	CC	CC	CC	CC	GG	GG	CC	CC	GG	CC	GG	CC	GG	CC	GG	CC	CC	CC
AX-94591946	1D	208427368	A/G	GG	AA	GG	GG	AA	AA	GG	AA	AA	AA	GG	AA	AA	AA	GG	GG	GG	AA	GG	GG	GG	AA	AA	GG	AA	GG	AA	GG	GG	GG	GG	AA	AA	GG	AA	AA	AA	AA	GG	AA	GG	GG	AA	AA	AA	AA
AX-94439189	1D	240134619	T/C	TT	CC	TT	TT	TT	TT	TT	TT	CC	TT	TT	TT	TT	TT	TT	CC	TT	TT	TT	TT	CC	TT	TT	TT	TT	NN	CC	TT	CC	TT	TT	TT	TT	TT	TT	TT	TT	TT	CC	TT	TT	TT	CC	TT	TT	TT
AX-95119988	1D	258332384	C/T	CC	CC	CC	CC	TT	CC	TT	TT	CC	TT	CC	CC	CC	TT	CC	CC	CC	CC	CC	CC	CC	CC	CC	CC	CC	CC	CC	CC	CC	CC	CC	CC	CC	TT	CC	CC	CC	CC	NN	CC	CC	CC	TT	CC	CC	TT
AX-94487436	1D	258390418	G/A	GG	GG	GG	GG	GG	GG	GG	GG	GG	GG	GG	GG	AA	GG	GG	GG	GG	GG	GG	AA	GG	AA	GG	AA	GG	GG	NN	GG	GG	GG	GG	GG	GG	GG	AA	GG	AA	GG	GG	GG	GG	GG	GG	AA	GG	GG
AX-95216543	1D	285443875	C/T	TT	TT	CC	TT	TT	CC	TT	TT	CC	TT	CC	TT	CC	TT	CC	CC	CC	CC	CC	CC	CC	CC	CC	TT	CC	CC	CC	CC	CC	CC	CC	TT	CC	TT	CC	CC	CC	CC	TT	CC	CC	CC	TT	TT	CC	TT
AX-95255982	1D	315065527	C/T	TT	TT	TT	CC	CC	CC	CC	CC	TT	CC	TT	TT	CC	CC	TT	CC	CC	CC	TT	CC	TT	CC	TT	CC	TT	CC	TT	CC	CC	TT	TT	CC	CC	CC	CC	CC	CC	CC	CC	CC	CC	TT	CC	CC	TT	CC
AX-94526984	1D	319574543	G/C	GG	GG	GG	GG	GG	GG	GG	GG	GG	GG	GG	GG	CC	GG	GG	GG	GG	GG	GG	CC	GG	CC	GG	CC	GG	GG	NN	GG	GG	GG	GG	GG	GG	GG	CC	GG	CC	GG	GG	GG	GG	GG	GG	CC	GG	GG
AX-94383321	1D	362322284	T/G	TT	TT	TT	TT	NN	TT	TT	TT	TT	TT	TT	TT	TT	TT	TT	TT	TT	GG	TT	GG	TT	GG	GG	TT	TT	GG	TT	TT	TT	TT	TT	GG	TT	TT	GG	TT	TT	TT	TT	GG	TT	TT	TT	GG	TT	GG
AX-94893744	1D	366197960	C/T	CC	CC	CC	CC	TT	CC	TT	TT	TT	CC	CC	TT	CC	TT	CC	CC	CC	CC	CC	CC	CC	TT	CC	CC	CC	CC	TT	CC	CC	CC	CC	TT	CC	TT	CC	TT	CC	CC	TT	CC	CC	CC	TT	CC	CC	TT
AX-95685185	1D	368340017	C/A	CC	AA	CC	AA	AA	CC	AA	AA	AA	AA	CC	AA	CC	AA	CC	CC	CC	CC	CC	CC	CC	AA	CC	CC	CC	CC	AA	CC	CC	CC	CC	AA	CC	AA	CC	AA	CC	CC	AA	CC	AA	CC	AA	AA	AA	AA
AX-94556277	1D	389524607	C/A	CC	CC	CC	CC	CC	CC	CC	AA	AA	CC	CC	AA	CC	AA	CC	CC	CC	CC	CC	CC	CC	AA	CC	CC	CC	CC	AA	CC	CC	CC	CC	CC	CC	CC	CC	AA	CC	CC	AA	CC	CC	CC	AA	CC	CC	CC
AX-95240564	1D	402295619	C/T	TT	TT	TT	CC	CC	TT	CC	TT	CC	CC	CC	TT	TT	CC	TT	CC	TT	TT	TT	CC	CC	CC	TT	CC	CC	CC	CC	TT	CC	CC	CC	CC	NN	CC	CC	CC	CC	CC	CC	CC	TT	CC	TT	CC	CC	CC
AX-94960699	1D	407873688	C/T	TT	TT	CC	CC	TT	CC	TT	CC	TT	CC	CC	CC	TT	CC	CC	CC	CC	CC	CC	CC	CC	CC	CC	CC	CC	CC	TT	TT	CC	CC	CC	CC	CC	TT	CC	CC	CC	CC	CC	CC	CC	CC	CC	CC	CC	CC
AX-95141187	1D	407916266	G/A	AA	AA	GG	GG	AA	GG	AA	GG	AA	GG	GG	GG	AA	GG	GG	GG	GG	GG	AA	GG	GG	GG	GG	GG	AA	GG	AA	AA	AA	GG	GG	GG	GG	AA	GG	GG	GG	GG	GG	GG	GG	GG	AA	GG	AA	AA
AX-94965765	1D	409530631	G/C	CC	CC	GG	GG	CC	GG	CC	CC	CC	GG	GG	GG	CC	GG	GG	GG	GG	GG	GG	GG	GG	GG	GG	GG	GG	GG	CC	CC	GG	GG	GG	GG	GG	CC	GG	GG	CC	GG	GG	GG	GG	GG	CC	GG	GG	GG
AX-94713369	1D	410504380	T/A	TT	TT	TT	TT	AA	TT	AA	TT	TT	TT	TT	AA	TT	TT	AA	TT	TT	TT	TT	TT	TT	TT	AA	TT	TT	AA	TT	TT	TT	AA	TT	TT	AA	TT	TT	TT	TT	TT	TT	TT	TT	AA	TT	TT	TT	TT
AX-95246613	1D	415292920	T/C	CC	CC	TT	TT	CC	TT	CC	CC	CC	TT	TT	TT	CC	TT	TT	TT	NN	TT	TT	TT	TT	TT	TT	TT	TT	TT	CC	CC	TT	TT	TT	TT	TT	CC	TT	TT	CC	TT	TT	TT	TT	TT	CC	TT	TT	TT
AX-95110895	1D	415415859	C/T	TT	TT	CC	CC	TT	CC	TT	TT	TT	CC	CC	CC	TT	CC	CC	CC	CC	CC	CC	CC	CC	CC	CC	CC	CC	CC	TT	TT	CC	CC	CC	CC	CC	TT	CC	CC	TT	CC	CC	CC	CC	CC	TT	CC	CC	CC
AX-94482403	1D	416843929	T/C	TT	TT	TT	TT	TT	TT	TT	CC	CC	TT	TT	TT	TT	TT	TT	TT	TT	TT	TT	TT	TT	TT	TT	TT	TT	TT	CC	TT	TT	TT	TT	TT	TT	TT	TT	TT	CC	TT	TT	TT	TT	TT	CC	TT	TT	TT
AX-94455014	1D	431821114	G/T	GG	TT	GG	GG	TT	GG	TT	GG	GG	GG	GG	GG	TT	GG	GG	GG	GG	GG	GG	GG	GG	GG	GG	GG	GG	GG	GG	GG	GG	TT	GG	GG	GG	GG	GG	GG	GG	GG	GG	GG	GG	GG	TT	GG	GG	TT
AX-94964791	1D	445074369	C/T	TT	TT	TT	CC	CC	CC	CC	TT	CC	CC	CC	CC	TT	TT	CC	CC	TT	CC	CC	CC	CC	CC	CC	CC	CC	CC	CC	TT	CC	CC	CC	CC	CC	TT	CC	CC	CC	CC	CC	CC	CC	CC	TT	CC	CC	CC
AX-95108137	1D	445188502	T/C	TT	TT	TT	TT	TT	TT	TT	TT	CC	TT	TT	TT	TT	TT	TT	TT	TT	TT	TT	TT	TT	TT	TT	TT	TT	TT	CC	TT	CC	TT	TT	TT	TT	CC	TT	TT	CC	TT	TT	TT	TT	TT	TT	TT	TT	CC
AX-95171902	1D	445590574	C/T	TT	TT	TT	TT	CC	CC	CC	TT	CC	TT	TT	CC	TT	TT	CC	CC	TT	CC	CC	TT	CC	TT	CC	CC	CC	CC	CC	TT	CC	CC	CC	TT	CC	TT	TT	TT	TT	CC	TT	TT	TT	CC	TT	TT	CC	TT
AX-94603856	1D	446273978	G/A	GG	GG	GG	GG	GG	GG	GG	AA	GG	GG	GG	AA	GG	GG	GG	AA	AA	GG	GG	GG	AA	GG	AA	AA	GG	GG	GG	GG	GG	GG	AA	AA	GG	GG	GG	AA	GG	GG	GG	AA	GG	GG	GG	GG	AA	GG
AX-95141299	1D	452621459	T/C	CC	TT	CC	CC	TT	TT	TT	TT	TT	TT	TT	CC	TT	CC	TT	TT	TT	CC	TT	TT	TT	TT	TT	TT	TT	TT	TT	TT	CC	TT	TT	CC	TT	CC	TT	TT	CC	TT	TT	TT	TT	TT	TT	CC	TT	CC
AX-94403046	1D	458325453	A/G	GG	AA	AA	AA	AA	GG	AA	AA	AA	AA	AA	AA	AA	AA	AA	GG	AA	AA	AA	GG	AA	GG	AA	GG	AA	GG	AA	AA	GG	AA	AA	AA	GG	AA	GG	AA	AA	GG	AA	GG	GG	AA	AA	GG	AA	AA
AX-94805297	1D	459890218	G/A	GG	GG	AA	GG	GG	GG	GG	AA	GG	GG	AA	GG	AA	AA	AA	AA	GG	AA	AA	GG	GG	GG	GG	AA	AA	GG	GG	GG	AA	GG	GG	GG	GG	GG	GG	AA	GG	GG	AA	GG	GG	AA	AA	GG	GG	GG
AX-94916522	1D	462053369	T/G	TT	TT	TT	TT	TT	GG	TT	TT	GG	TT	TT	GG	TT	TT	TT	TT	TT	TT	TT	GG	GG	GG	TT	TT	TT	GG	GG	TT	TT	GG	GG	GG	GG	GG	GG	TT	GG	GG	TT	GG	GG	TT	TT	TT	GG	GG
AX-95123147	1D	465078225	T/C	TT	TT	CC	TT	CC	TT	CC	TT	CC	TT	CC	TT	TT	TT	TT	TT	TT	TT	TT	CC	TT	CC	TT	TT	TT	TT	CC	TT	TT	CC	TT	TT	TT	TT	CC	TT	TT	TT	TT	TT	TT	TT	TT	TT	TT	TT
AX-95097609	1D	468886871	G/C	CC	CC	CC	GG	GG	GG	GG	GG	CC	GG	CC	CC	GG	GG	CC	GG	GG	GG	CC	GG	CC	GG	CC	GG	CC	GG	CC	GG	GG	CC	CC	GG	GG	GG	GG	GG	GG	GG	GG	GG	GG	CC	GG	GG	CC	GG
AX-94712927	1D	470125590	T/G	GG	TT	TT	TT	GG	GG	GG	TT	TT	GG	TT	TT	TT	GG	GG	TT	TT	GG	GG	GG	TT	TT	GG	TT	GG	GG	TT	TT	GG	GG	TT	TT	TT	TT	TT	GG	TT	GG	TT	GG	TT	GG	TT	TT	GG	TT
AX-95160390	1D	483071618	C/G	CC	GG	CC	CC	GG	CC	GG	CC	CC	CC	CC	GG	GG	CC	CC	GG	CC	GG	CC	GG	GG	GG	CC	GG	CC	GG	CC	GG	CC	GG	CC	GG	CC	CC	GG	GG	GG	GG	CC	GG	CC	GG	GG	CC	GG	CC
AX-94715623	1D	485020997	T/G	TT	GG	TT	TT	GG	TT	GG	TT	TT	TT	TT	TT	GG	TT	TT	GG	TT	TT	TT	TT	TT	TT	TT	TT	TT	TT	TT	GG	TT	TT	TT	TT	TT	TT	TT	TT	TT	TT	TT	TT	TT	TT	GG	TT	TT	TT
AX-94443057	1D	485754739	T/C	TT	CC	TT	TT	CC	TT	CC	TT	TT	TT	TT	TT	CC	TT	TT	CC	TT	TT	TT	TT	TT	TT	TT	TT	TT	TT	TT	CC	TT	TT	TT	TT	TT	TT	TT	TT	TT	TT	TT	TT	TT	TT	CC	TT	TT	TT
AX-94701609	1D	486069229	A/G	GG	AA	GG	AA	AA	GG	AA	GG	AA	AA	GG	AA	AA	GG	GG	AA	AA	AA	GG	AA	GG	AA	GG	GG	AA	GG	AA	AA	GG	GG	GG	GG	AA	NN	NN	GG	AA	GG	AA	GG	AA	GG	AA	AA	GG	AA
AX-94568598	1D	486858034	C/T	CC	TT	CC	CC	TT	CC	TT	CC	CC	CC	CC	CC	TT	CC	CC	TT	CC	CC	CC	CC	CC	CC	CC	CC	CC	CC	CC	TT	CC	CC	CC	CC	CC	CC	CC	CC	CC	CC	CC	CC	CC	CC	TT	CC	CC	CC
AX-95249874	1D	487175342	T/C	TT	TT	TT	TT	TT	TT	TT	TT	TT	CC	TT	TT	TT	TT	TT	TT	TT	TT	TT	TT	TT	CC	TT	CC	TT	TT	TT	TT	CC	TT	TT	TT	TT	CC	CC	CC	CC	TT	TT	TT	TT	TT	TT	TT	TT	CC
AX-94718560	1D	487894830	T/C	TT	TT	TT	CC	TT	TT	TT	TT	TT	CC	TT	CC	TT	TT	TT	TT	CC	CC	TT	CC	TT	CC	TT	TT	CC	TT	TT	TT	TT	TT	TT	TT	CC	CC	CC	TT	CC	TT	TT	TT	CC	TT	TT	CC	TT	CC
AX-94974882	1D	487952259	T/C	TT	TT	CC	TT	TT	CC	TT	CC	TT	TT	CC	TT	TT	CC	CC	TT	TT	TT	CC	TT	TT	TT	CC	CC	TT	CC	TT	TT	CC	CC	CC	TT	TT	TT	TT	TT	TT	TT	TT	TT	TT	TT	TT	TT	TT	TT
AX-95074107	1D	488951206	C/G	CC	GG	CC	CC	GG	CC	GG	CC	CC	CC	CC	CC	GG	CC	CC	GG	CC	CC	CC	CC	CC	CC	CC	CC	CC	CC	CC	GG	CC	CC	CC	CC	CC	CC	CC	CC	CC	CC	CC	CC	CC	CC	GG	CC	CC	CC
AX-95253982	1D	492615428	C/T	CC	TT	CC	TT	TT	TT	TT	CC	TT	TT	CC	CC	TT	CC	CC	TT	TT	TT	CC	CC	TT	CC	CC	CC	CC	CC	CC	TT	CC	CC	CC	TT	TT	TT	CC	CC	CC	CC	CC	CC	TT	CC	TT	TT	CC	TT
AX-94754170	1D	493485433	T/C	TT	TT	TT	TT	TT	CC	TT	TT	TT	TT	TT	TT	TT	TT	TT	TT	CC	TT	TT	TT	TT	TT	TT	TT	TT	TT	TT	TT	TT	TT	TT	TT	CC	CC	TT	TT	TT	TT	TT	TT	TT	TT	TT	TT	TT	CC
AX-94788925	1D	494555104	A/G	AA	AA	AA	AA	AA	GG	AA	AA	GG	GG	AA	AA	AA	AA	AA	GG	GG	AA	AA	AA	AA	GG	AA	GG	AA	AA	AA	AA	AA	AA	AA	AA	GG	GG	GG	GG	GG	AA	AA	AA	AA	AA	NN	AA	AA	GG
AX-94422723	1D	495019902	C/A	CC	AA	CC	CC	AA	CC	AA	CC	CC	CC	CC	CC	AA	CC	CC	AA	CC	CC	CC	CC	CC	CC	CC	CC	CC	CC	CC	AA	CC	CC	CC	CC	CC	CC	CC	NN	CC	CC	CC	CC	CC	CC	AA	CC	CC	CC
AX-94793453	1D	495111012	G/C	GG	CC	GG	GG	CC	GG	CC	GG	GG	GG	GG	GG	CC	GG	GG	CC	GG	GG	GG	GG	GG	GG	GG	GG	GG	GG	GG	CC	GG	GG	GG	GG	GG	GG	GG	GG	GG	GG	GG	GG	GG	GG	CC	GG	GG	GG
AX-94644557	2A	398369	C/G	CC	CC	CC	GG	CC	GG	CC	GG	GG	GG	GG	GG	CC	GG	CC	CC	GG	CC	CC	GG	CC	GG	CC	GG	GG	CC	GG	GG	GG	CC	CC	CC	GG	CC	GG	GG	GG	GG	CC	CC	GG	CC	CC	GG	CC	CC
AX-94467783	2A	892061	G/C	GG	CC	GG	CC	GG	GG	GG	GG	CC	CC	CC	GG	GG	CC	GG	GG	GG	GG	GG	CC	GG	CC	GG	CC	GG	GG	CC	GG	GG	GG	GG	GG	GG	GG	CC	GG	GG	GG	GG	GG	CC	GG	CC	GG	GG	GG
AX-94406025	2A	1370595	G/C	GG	CC	GG	GG	GG	CC	GG	CC	CC	GG	GG	CC	CC	GG	GG	GG	CC	GG	GG	GG	GG	GG	CC	GG	GG	GG	GG	CC	CC	GG	GG	GG	CC	GG	GG	CC	CC	CC	GG	GG	GG	GG	CC	CC	GG	GG
AX-95172700	2A	1777727	T/C	CC	CC	CC	TT	CC	TT	CC	TT	CC	TT	TT	TT	TT	TT	CC	CC	TT	CC	CC	TT	CC	TT	TT	TT	CC	CC	TT	TT	TT	CC	CC	CC	TT	CC	TT	TT	TT	TT	CC	CC	TT	CC	CC	TT	CC	CC
AX-94543148	2A	2327023	C/T	NN	CC	CC	TT	CC	TT	CC	TT	CC	TT	CC	TT	CC	TT	CC	CC	TT	CC	CC	TT	CC	TT	TT	TT	CC	CC	CC	CC	TT	CC	CC	CC	TT	CC	TT	TT	TT	TT	NN	CC	TT	CC	CC	TT	CC	CC
AX-95202120	2A	2653347	A/G	GG	AA	GG	AA	GG	AA	GG	AA	AA	AA	AA	AA	AA	AA	GG	GG	AA	GG	GG	AA	GG	AA	AA	AA	AA	GG	AA	GG	AA	GG	GG	GG	AA	GG	AA	AA	AA	AA	GG	GG	AA	GG	AA	AA	GG	GG
AX-95142069	2A	2708163	G/C	GG	GG	GG	GG	GG	CC	GG	CC	GG	GG	GG	CC	GG	GG	GG	GG	GG	GG	GG	GG	GG	GG	GG	GG	GG	GG	GG	GG	CC	GG	GG	GG	CC	GG	GG	GG	CC	CC	GG	GG	GG	GG	GG	CC	GG	GG
AX-95227268	2A	3104660	A/G	AA	GG	AA	GG	AA	AA	AA	AA	GG	GG	GG	AA	AA	GG	AA	AA	AA	AA	AA	GG	AA	AA	AA	GG	NN	AA	GG	AA	AA	AA	NN	AA	AA	AA	GG	AA	AA	AA	AA	AA	GG	AA	GG	AA	AA	AA
AX-95227146	2A	3334421	G/A	GG	GG	GG	GG	GG	AA	GG	AA	GG	GG	GG	AA	AA	GG	GG	GG	AA	GG	GG	GG	GG	AA	AA	GG	GG	GG	GG	AA	AA	GG	GG	GG	AA	GG	GG	AA	AA	AA	GG	GG	GG	GG	GG	AA	GG	GG
AX-94767021	2A	3609485	C/A	AA	CC	AA	CC	AA	CC	AA	CC	CC	CC	CC	CC	CC	CC	AA	AA	CC	AA	AA	NN	AA	CC	CC	CC	AA	AA	CC	CC	CC	AA	AA	AA	CC	AA	CC	CC	CC	CC	AA	AA	CC	AA	CC	CC	AA	AA
AX-94829882	2A	3962507	C/T	TT	CC	TT	CC	TT	CC	TT	CC	CC	CC	CC	CC	CC	CC	TT	TT	CC	TT	TT	CC	TT	CC	CC	CC	CC	TT	TT	CC	TT	TT	TT	TT	CC	TT	CC	CC	CC	CC	TT	TT	CC	TT	CC	CC	TT	TT
AX-94424669	2A	4165016	C/T	CC	CC	CC	CC	CC	TT	CC	TT	CC	CC	CC	TT	TT	CC	CC	CC	TT	CC	CC	CC	CC	TT	TT	CC	TT	CC	CC	TT	TT	CC	CC	CC	TT	CC	CC	TT	TT	TT	CC	CC	CC	CC	CC	TT	CC	CC
AX-94820378	2A	4216068	C/T	TT	CC	TT	CC	TT	CC	TT	CC	CC	CC	CC	CC	CC	CC	TT	TT	CC	TT	TT	CC	TT	CC	CC	CC	CC	TT	CC	CC	CC	TT	TT	TT	CC	TT	CC	CC	CC	CC	TT	TT	CC	TT	CC	CC	TT	TT
AX-94956032	2A	4620547	G/C	GG	CC	GG	CC	GG	GG	GG	GG	CC	CC	CC	GG	CC	CC	GG	GG	CC	GG	GG	CC	GG	CC	CC	CC	CC	GG	CC	CC	GG	GG	GG	GG	GG	GG	CC	CC	GG	GG	GG	GG	CC	GG	CC	GG	GG	GG
AX-94476555	2A	6183145	C/A	CC	AA	AA	AA	CC	CC	CC	CC	CC	CC	CC	CC	CC	CC	CC	CC	CC	CC	CC	CC	AA	CC	CC	AA	CC	CC	CC	AA	CC	CC	CC	CC	CC	CC	CC	CC	CC	CC	CC	CC	AA	CC	CC	CC	CC	AA
AX-94772880	2A	7807418	C/T	CC	TT	CC	TT	CC	CC	CC	TT	TT	TT	TT	TT	CC	TT	CC	CC	CC	CC	CC	TT	CC	TT	CC	TT	TT	CC	TT	CC	CC	CC	CC	CC	TT	CC	TT	CC	CC	TT	CC	CC	TT	CC	TT	TT	CC	CC
AX-94485036	2A	10587435	T/C	TT	CC	TT	TT	TT	CC	TT	CC	CC	TT	TT	CC	CC	TT	TT	TT	CC	TT	TT	TT	TT	TT	CC	TT	CC	TT	CC	NN	CC	TT	TT	TT	CC	TT	TT	CC	CC	CC	TT	TT	TT	TT	CC	CC	TT	TT
AX-94593885	2A	10599551	C/T	CC	CC	CC	TT	CC	CC	CC	CC	CC	TT	TT	CC	CC	TT	CC	CC	CC	CC	CC	TT	CC	TT	CC	TT	CC	CC	CC	CC	CC	CC	CC	CC	CC	CC	TT	CC	CC	CC	CC	CC	TT	CC	CC	CC	CC	CC
AX-95176044	2A	11613783	G/C	CC	GG	CC	GG	CC	GG	CC	GG	GG	GG	NN	GG	GG	GG	CC	CC	GG	CC	CC	GG	CC	GG	GG	GG	GG	CC	GG	GG	GG	CC	CC	CC	GG	CC	GG	GG	GG	GG	CC	CC	GG	CC	GG	GG	CC	CC
AX-94864373	2A	12330758	G/A	GG	AA	GG	GG	GG	GG	GG	AA	GG	GG	AA	GG	GG	AA	GG	GG	GG	GG	GG	GG	GG	GG	GG	GG	GG	GG	GG	AA	GG	GG	GG	GG	GG	GG	GG	GG	GG	NN	GG	GG	GG	GG	AA	GG	GG	GG
AX-95092202	2A	13015898	G/A	GG	GG	GG	AA	GG	AA	GG	GG	AA	AA	GG	AA	GG	GG	GG	GG	AA	GG	GG	AA	GG	AA	AA	AA	AA	GG	AA	GG	AA	GG	GG	GG	AA	GG	AA	AA	GG	GG	GG	GG	AA	GG	GG	AA	GG	GG
AX-95215221	2A	13016145	C/T	CC	CC	CC	CC	CC	CC	CC	CC	CC	CC	CC	CC	CC	CC	CC	TT	CC	TT	CC	CC	TT	CC	CC	CC	CC	TT	CC	CC	CC	TT	TT	TT	CC	CC	CC	CC	CC	CC	CC	TT	CC	CC	CC	CC	TT	TT
AX-94770468	2A	13814002	C/T	TT	CC	TT	CC	TT	CC	TT	CC	CC	CC	NN	CC	CC	CC	TT	TT	CC	TT	TT	CC	TT	CC	CC	CC	CC	TT	CC	CC	CC	TT	TT	TT	CC	TT	CC	CC	CC	CC	TT	TT	CC	TT	NN	CC	TT	TT
AX-94799055	2A	13849771	C/T	CC	CC	CC	TT	CC	TT	CC	CC	NN	TT	CC	TT	CC	CC	CC	CC	TT	CC	CC	CC	TT	CC	TT	CC	TT	CC	TT	CC	TT	CC	TT	CC	TT	CC	CC	CC	CC	CC	CC	CC	TT	CC	CC	CC	TT	TT
AX-94643264	2A	14064993	G/A	AA	GG	AA	GG	AA	GG	AA	GG	GG	GG	GG	GG	GG	GG	AA	AA	GG	AA	AA	GG	AA	GG	GG	GG	GG	AA	GG	GG	GG	AA	AA	AA	GG	AA	GG	GG	GG	GG	AA	AA	GG	AA	GG	GG	AA	AA
AX-94495564	2A	14302301	T/A	TT	TT	TT	AA	TT	TT	TT	AA	TT	AA	AA	AA	AA	AA	TT	TT	AA	TT	TT	AA	TT	AA	AA	AA	AA	TT	TT	AA	AA	TT	TT	TT	TT	TT	AA	AA	AA	AA	TT	TT	AA	TT	TT	TT	TT	TT
AX-94599595	2A	14958893	T/G	GG	GG	GG	TT	GG	TT	GG	GG	TT	TT	GG	TT	GG	GG	GG	TT	TT	TT	GG	TT	TT	TT	TT	TT	TT	TT	TT	GG	TT	TT	TT	TT	TT	GG	TT	TT	GG	GG	GG	TT	TT	GG	GG	TT	TT	TT
AX-95244536	2A	14998783	A/G	AA	AA	AA	AA	AA	AA	AA	AA	AA	AA	AA	AA	AA	AA	AA	GG	AA	GG	AA	AA	GG	AA	AA	AA	AA	GG	AA	AA	AA	GG	GG	GG	AA	AA	AA	AA	AA	AA	AA	GG	AA	AA	AA	AA	GG	GG
AX-95092951	2A	14998876	G/T	GG	TT	GG	GG	GG	GG	GG	TT	GG	GG	GG	GG	TT	TT	GG	GG	GG	GG	GG	GG	GG	GG	GG	GG	GG	GG	GG	GG	GG	GG	GG	GG	GG	GG	GG	GG	TT	TT	GG	GG	GG	GG	TT	GG	GG	GG
AX-94906868	2A	15031128	C/A	CC	CC	AA	CC	CC	CC	CC	AA	CC	CC	CC	CC	CC	AA	AA	CC	CC	CC	AA	CC	CC	CC	CC	CC	CC	CC	CC	CC	CC	CC	CC	CC	CC	CC	CC	CC	AA	AA	CC	CC	CC	AA	CC	CC	CC	CC
AX-95224063	2A	15115646	A/G	GG	AA	AA	AA	GG	AA	GG	AA	AA	AA	AA	AA	AA	AA	AA	GG	AA	GG	AA	AA	GG	AA	AA	AA	AA	GG	AA	AA	AA	GG	GG	GG	AA	GG	AA	AA	AA	AA	GG	GG	AA	AA	AA	AA	GG	GG
AX-95177976	2A	15874116	T/C	TT	TT	CC	TT	TT	TT	TT	TT	TT	TT	TT	TT	TT	TT	CC	TT	TT	TT	TT	TT	TT	TT	TT	TT	TT	TT	TT	TT	TT	TT	TT	TT	TT	TT	TT	TT	TT	CC	TT	TT	TT	CC	TT	TT	TT	TT
AX-94808625	2A	16322909	T/C	CC	CC	NN	TT	NN	TT	CC	TT	CC	TT	CC	TT	TT	TT	NN	TT	CC	TT	TT	TT	NN	TT	TT	TT	CC	TT	CC	CC	CC	TT	TT	TT	TT	CC	TT	TT	CC	TT	CC	TT	TT	NN	CC	TT	TT	TT
AX-94484605	2A	16404700	G/A	AA	GG	AA	GG	AA	GG	AA	GG	GG	GG	GG	GG	GG	GG	AA	AA	GG	AA	AA	GG	AA	GG	GG	GG	GG	AA	GG	GG	GG	AA	AA	AA	GG	AA	GG	GG	GG	GG	AA	AA	GG	AA	GG	GG	AA	AA
AX-94909839	2A	16432893	C/T	TT	CC	TT	CC	TT	CC	TT	CC	CC	CC	CC	CC	CC	CC	TT	TT	CC	TT	TT	CC	TT	CC	CC	CC	CC	TT	CC	CC	CC	TT	TT	TT	CC	TT	CC	CC	CC	CC	TT	TT	CC	TT	CC	CC	TT	TT
AX-95083356	2A	16433731	C/T	TT	CC	CC	CC	CC	CC	TT	CC	CC	CC	CC	CC	CC	CC	CC	TT	CC	TT	TT	CC	CC	CC	CC	CC	CC	TT	CC	CC	CC	TT	TT	TT	CC	TT	CC	CC	CC	NN	TT	TT	CC	CC	CC	CC	TT	TT
AX-95198970	2A	17311045	G/T	TT	GG	TT	GG	TT	GG	TT	GG	GG	GG	GG	GG	GG	GG	TT	TT	GG	TT	TT	GG	TT	GG	GG	GG	GG	TT	GG	GG	GG	TT	TT	TT	GG	TT	GG	GG	GG	GG	TT	TT	GG	TT	GG	GG	TT	TT
AX-94564661	2A	18299226	A/C	AA	CC	AA	AA	AA	AA	AA	CC	CC	CC	AA	CC	CC	CC	AA	AA	CC	AA	AA	AA	AA	AA	CC	AA	CC	AA	NN	CC	CC	AA	AA	AA	AA	AA	AA	CC	AA	CC	AA	AA	AA	AA	CC	AA	AA	AA
AX-95117848	2A	18587363	T/C	CC	TT	CC	TT	CC	TT	CC	TT	TT	TT	TT	TT	TT	TT	CC	CC	TT	CC	CC	TT	CC	TT	TT	TT	TT	CC	TT	TT	TT	CC	CC	CC	TT	CC	TT	TT	TT	TT	CC	CC	TT	CC	TT	TT	CC	CC
AX-94545725	2A	18912368	G/T	GG	GG	GG	GG	GG	GG	GG	TT	TT	TT	GG	TT	TT	TT	GG	GG	TT	GG	GG	GG	GG	GG	TT	GG	TT	GG	GG	GG	TT	GG	GG	GG	GG	GG	GG	TT	GG	TT	GG	GG	GG	GG	GG	GG	GG	GG
AX-95163150	2A	19071658	C/T	CC	CC	CC	TT	CC	TT	CC	CC	CC	CC	TT	CC	CC	CC	CC	CC	CC	CC	CC	TT	CC	TT	CC	TT	CC	CC	TT	CC	CC	CC	CC	CC	TT	CC	TT	CC	TT	CC	CC	CC	TT	CC	CC	TT	CC	CC
AX-94423796	2A	19126234	C/T	CC	TT	CC	CC	CC	CC	CC	TT	TT	TT	CC	TT	TT	TT	CC	CC	TT	CC	CC	CC	CC	CC	TT	CC	TT	CC	NN	NN	TT	CC	CC	CC	CC	CC	CC	TT	CC	TT	CC	CC	CC	CC	TT	CC	CC	CC
AX-94700495	2A	19447912	A/G	AA	GG	AA	AA	AA	AA	AA	GG	GG	GG	AA	GG	GG	GG	AA	AA	GG	AA	AA	AA	AA	AA	GG	AA	GG	AA	AA	GG	GG	AA	AA	AA	AA	AA	AA	GG	AA	GG	AA	AA	AA	AA	GG	AA	AA	AA
AX-94438524	2A	19595145	G/C	GG	GG	CC	CC	CC	CC	CC	GG	GG	GG	CC	GG	GG	GG	CC	GG	GG	CC	CC	GG	CC	GG	GG	GG	GG	CC	NN	GG	GG	CC	CC	CC	CC	CC	GG	GG	GG	GG	CC	CC	CC	CC	GG	GG	CC	CC
AX-94982825	2A	19943549	A/G	GG	AA	GG	AA	GG	AA	GG	AA	AA	AA	GG	AA	AA	AA	GG	GG	AA	GG	GG	GG	GG	GG	AA	GG	AA	GG	NN	AA	AA	GG	GG	GG	AA	GG	GG	AA	AA	AA	GG	GG	AA	GG	AA	AA	GG	GG
AX-94414505	2A	20040752	C/G	CC	CC	CC	GG	CC	GG	CC	CC	CC	CC	GG	CC	CC	CC	CC	CC	CC	CC	CC	GG	CC	GG	CC	GG	CC	CC	GG	NN	CC	CC	CC	CC	GG	CC	GG	CC	GG	CC	CC	CC	GG	CC	CC	GG	CC	CC
AX-94381554	2A	21424339	T/C	CC	TT	CC	TT	CC	TT	CC	TT	TT	TT	TT	TT	TT	TT	CC	CC	TT	CC	CC	TT	CC	TT	TT	TT	TT	CC	TT	TT	TT	CC	CC	CC	TT	CC	TT	TT	TT	TT	CC	CC	TT	CC	TT	TT	CC	CC
AX-94739692	2A	24059991	G/A	GG	AA	GG	AA	GG	GG	GG	AA	AA	AA	GG	AA	AA	AA	GG	GG	AA	GG	GG	GG	GG	GG	AA	GG	AA	GG	AA	AA	AA	GG	GG	GG	GG	GG	GG	AA	GG	AA	GG	GG	AA	GG	AA	GG	GG	GG
AX-95074396	2A	24113874	A/G	AA	AA	AA	AA	AA	GG	AA	AA	AA	AA	GG	AA	AA	AA	AA	AA	AA	AA	AA	GG	AA	GG	AA	GG	AA	AA	AA	AA	AA	AA	AA	AA	GG	AA	GG	AA	GG	AA	AA	AA	AA	AA	AA	GG	AA	AA
AX-94438927	2A	24177783	G/T	GG	TT	GG	TT	GG	TT	GG	GG	TT	GG	TT	GG	GG	GG	GG	GG	GG	GG	GG	TT	GG	TT	GG	TT	TT	GG	TT	GG	GG	GG	GG	GG	TT	GG	TT	GG	TT	TT	GG	GG	TT	GG	GG	TT	GG	GG
AX-95660629	2A	24278836	A/G	GG	AA	GG	AA	GG	AA	GG	AA	AA	AA	AA	AA	AA	AA	GG	GG	AA	GG	GG	AA	GG	AA	AA	AA	AA	GG	AA	AA	AA	GG	GG	GG	AA	GG	AA	AA	AA	AA	GG	GG	AA	GG	AA	AA	GG	GG
AX-94396056	2A	24283804	G/C	CC	GG	CC	GG	CC	CC	CC	GG	GG	GG	GG	GG	GG	GG	CC	CC	GG	CC	CC	GG	CC	GG	GG	GG	GG	CC	GG	GG	GG	CC	CC	CC	CC	CC	GG	GG	GG	GG	CC	CC	GG	CC	GG	GG	CC	CC
AX-94684111	2A	27276027	T/G	TT	GG	TT	GG	TT	GG	TT	TT	GG	TT	TT	TT	TT	TT	TT	TT	TT	TT	TT	TT	TT	TT	TT	TT	GG	TT	GG	TT	TT	TT	TT	TT	GG	TT	TT	TT	TT	TT	TT	TT	GG	TT	TT	TT	TT	TT
AX-94567936	2A	30447803	G/A	GG	GG	GG	AA	GG	GG	GG	AA	GG	GG	GG	GG	AA	AA	GG	GG	GG	GG	GG	GG	GG	GG	AA	GG	GG	GG	GG	GG	GG	GG	GG	GG	GG	GG	GG	GG	GG	AA	GG	GG	AA	GG	AA	GG	GG	GG
AX-94381641	2A	30571703	A/G	AA	AA	GG	AA	AA	AA	AA	AA	AA	GG	GG	AA	AA	AA	AA	AA	GG	AA	AA	AA	AA	AA	AA	AA	AA	AA	AA	GG	AA	AA	AA	AA	AA	AA	AA	GG	AA	AA	AA	AA	AA	AA	AA	AA	AA	AA
AX-94469556	2A	31085596	C/T	CC	TT	CC	TT	CC	CC	CC	TT	TT	CC	CC	CC	TT	TT	CC	CC	CC	CC	CC	TT	CC	TT	TT	TT	CC	CC	TT	CC	CC	CC	CC	CC	CC	CC	TT	CC	TT	TT	CC	CC	TT	CC	TT	TT	CC	CC
AX-94578476	2A	31166211	T/G	TT	TT	GG	TT	TT	GG	TT	TT	TT	TT	TT	GG	TT	TT	TT	TT	GG	GG	TT	TT	GG	TT	TT	TT	TT	TT	TT	GG	GG	TT	TT	TT	GG	GG	TT	GG	TT	TT	GG	TT	TT	TT	TT	TT	GG	GG
AX-95255993	2A	31811157	G/C	GG	GG	GG	GG	GG	CC	GG	CC	GG	GG	GG	CC	CC	CC	GG	GG	GG	GG	GG	CC	GG	CC	CC	CC	GG	GG	GG	GG	CC	GG	GG	GG	CC	GG	CC	GG	CC	CC	GG	GG	GG	GG	CC	CC	GG	GG
AX-95137689	2A	31952931	C/T	TT	CC	TT	TT	TT	TT	TT	CC	CC	CC	TT	CC	CC	CC	TT	TT	CC	TT	CC	CC	CC	CC	CC	CC	CC	CC	CC	CC	CC	CC	CC	TT	TT	TT	CC	CC	CC	CC	TT	CC	TT	TT	CC	TT	CC	TT
AX-94983435	2A	31978669	C/T	CC	TT	TT	TT	CC	CC	CC	TT	TT	TT	TT	CC	TT	TT	CC	CC	TT	CC	CC	CC	CC	CC	TT	CC	CC	CC	TT	TT	CC	CC	CC	CC	CC	CC	CC	TT	CC	TT	CC	CC	TT	CC	TT	CC	CC	CC
AX-95242673	2A	32116060	A/G	AA	GG	AA	AA	AA	AA	AA	AA	AA	AA	AA	AA	AA	AA	GG	AA	AA	AA	AA	GG	AA	GG	AA	AA	AA	GG	AA	AA	AA	AA	AA	AA	AA	AA	GG	AA	GG	AA	AA	AA	AA	AA	AA	GG	AA	AA
AX-94833876	2A	32144404	G/A	GG	AA	GG	AA	GG	GG	GG	AA	AA	GG	GG	GG	AA	AA	GG	GG	GG	GG	GG	GG	GG	GG	AA	GG	GG	GG	AA	GG	GG	GG	GG	GG	GG	GG	GG	GG	GG	AA	GG	GG	AA	GG	AA	GG	GG	GG
AX-95113471	2A	34467093	C/G	GG	CC	GG	CC	GG	CC	GG	CC	CC	CC	CC	CC	CC	CC	GG	GG	CC	GG	GG	CC	GG	CC	CC	CC	CC	GG	CC	CC	CC	GG	GG	GG	CC	GG	CC	CC	CC	CC	GG	GG	CC	GG	CC	CC	GG	GG
AX-95161807	2A	34664219	G/A	AA	GG	AA	AA	GG	GG	AA	GG	GG	GG	AA	GG	GG	GG	AA	AA	AA	GG	AA	AA	AA	GG	GG	AA	GG	AA	GG	AA	AA	AA	AA	GG	GG	AA	GG	GG	GG	GG	AA	GG	AA	AA	GG	GG	GG	GG
AX-95152008	2A	34665282	C/T	CC	CC	TT	CC	CC	TT	CC	TT	CC	CC	TT	TT	TT	TT	CC	CC	TT	CC	CC	TT	CC	TT	TT	CC	CC	CC	CC	TT	TT	CC	CC	CC	TT	CC	TT	TT	TT	TT	CC	CC	CC	CC	TT	TT	TT	CC
AX-94717360	2A	36040137	C/A	CC	AA	AA	CC	CC	AA	CC	CC	AA	AA	AA	AA	CC	CC	CC	CC	AA	CC	CC	AA	CC	AA	AA	CC	CC	CC	AA	AA	AA	CC	CC	CC	AA	CC	AA	AA	AA	CC	CC	AA	AA	CC	CC	AA	CC	CC
AX-94594842	2A	36131037	A/G	AA	GG	GG	AA	AA	GG	AA	AA	AA	AA	GG	GG	AA	AA	AA	AA	GG	AA	AA	AA	AA	AA	GG	AA	AA	AA	AA	GG	GG	AA	AA	AA	GG	AA	AA	GG	AA	AA	AA	AA	GG	AA	AA	AA	AA	AA
AX-95250370	2A	36631143	A/G	AA	AA	GG	AA	AA	AA	AA	AA	GG	AA	GG	AA	AA	AA	AA	AA	GG	AA	AA	AA	AA	AA	GG	AA	AA	AA	GG	GG	AA	AA	AA	AA	AA	AA	AA	GG	AA	AA	AA	AA	AA	GG	AA	AA	AA	AA
AX-94476096	2A	36930214	C/G	CC	CC	GG	CC	CC	CC	CC	CC	GG	CC	GG	GG	CC	CC	CC	CC	GG	CC	CC	CC	CC	CC	GG	CC	CC	CC	GG	GG	GG	CC	CC	CC	CC	CC	CC	GG	CC	CC	CC	CC	CC	GG	CC	CC	CC	CC
AX-95199197	2A	40595834	C/G	CC	CC	CC	GG	CC	CC	CC	GG	GG	CC	CC	CC	GG	GG	CC	CC	GG	GG	CC	CC	CC	CC	GG	CC	CC	CC	NN	CC	GG	CC	CC	CC	CC	CC	CC	GG	CC	GG	CC	CC	CC	CC	GG	CC	GG	GG
AX-95095483	2A	42398409	C/T	CC	TT	CC	TT	CC	CC	CC	TT	CC	CC	CC	CC	TT	TT	TT	CC	TT	NN	CC	CC	CC	CC	TT	CC	CC	TT	CC	CC	TT	CC	CC	CC	CC	CC	CC	TT	CC	TT	CC	CC	CC	CC	TT	CC	TT	TT
AX-94756068	2A	42476189	C/T	CC	TT	CC	TT	CC	CC	CC	TT	CC	CC	CC	CC	TT	TT	TT	CC	TT	TT	CC	CC	CC	CC	TT	CC	CC	TT	CC	CC	TT	CC	CC	CC	CC	CC	CC	TT	CC	TT	CC	CC	CC	CC	TT	CC	TT	TT
AX-94535064	2A	44836088	G/A	GG	GG	GG	AA	GG	GG	GG	AA	GG	GG	GG	GG	AA	AA	AA	GG	AA	GG	GG	GG	GG	GG	AA	GG	GG	AA	GG	GG	AA	GG	GG	GG	GG	GG	GG	AA	GG	AA	GG	GG	GG	GG	AA	GG	AA	GG
AX-94750740	2A	48396731	A/G	AA	GG	AA	AA	AA	AA	AA	AA	GG	GG	AA	AA	AA	AA	AA	AA	AA	AA	AA	GG	AA	GG	AA	AA	AA	AA	GG	AA	AA	AA	AA	AA	AA	AA	GG	AA	GG	AA	AA	GG	AA	AA	AA	GG	AA	AA
AX-94627798	2A	48397619	A/C	AA	AA	AA	AA	AA	CC	AA	AA	AA	CC	AA	CC	AA	AA	AA	CC	AA	CC	AA	AA	AA	AA	AA	AA	AA	AA	AA	AA	CC	AA	AA	AA	CC	AA	AA	AA	AA	AA	AA	AA	AA	AA	AA	AA	AA	AA
AX-95078056	2A	48838066	G/A	GG	GG	GG	GG	GG	GG	GG	GG	GG	GG	GG	GG	GG	GG	GG	GG	GG	GG	GG	AA	GG	AA	GG	GG	GG	GG	GG	GG	GG	GG	GG	GG	GG	GG	AA	GG	AA	GG	GG	AA	GG	GG	GG	AA	GG	GG
AX-94542072	2A	50047919	C/G	GG	CC	CC	GG	CC	CC	CC	GG	CC	CC	CC	CC	GG	GG	GG	CC	GG	CC	CC	CC	GG	CC	GG	CC	CC	GG	GG	GG	GG	CC	CC	CC	CC	CC	CC	GG	CC	GG	CC	CC	CC	CC	GG	CC	GG	CC
AX-94616756	2A	51940072	G/A	GG	AA	GG	GG	GG	GG	GG	GG	GG	GG	GG	GG	GG	GG	AA	GG	GG	GG	GG	AA	GG	AA	GG	GG	GG	AA	GG	GG	GG	GG	GG	GG	GG	GG	AA	GG	AA	GG	GG	AA	GG	GG	GG	AA	GG	GG
AX-94659499	2A	54192505	G/A	AA	GG	GG	AA	AA	AA	AA	AA	GG	AA	AA	GG	AA	GG	AA	GG	GG	GG	AA	GG	GG	GG	GG	GG	GG	AA	GG	GG	GG	AA	AA	AA	AA	GG	GG	GG	GG	GG	AA	GG	AA	AA	GG	GG	GG	GG
AX-94793700	2A	57547995	G/A	GG	AA	GG	GG	GG	GG	GG	GG	GG	GG	GG	GG	GG	GG	AA	GG	GG	GG	GG	AA	GG	AA	GG	GG	GG	AA	GG	GG	GG	GG	GG	GG	GG	GG	AA	GG	AA	GG	GG	GG	GG	GG	GG	AA	GG	GG
AX-94521851	2A	58000305	C/G	CC	GG	CC	GG	GG	CC	GG	GG	GG	CC	CC	CC	GG	CC	GG	CC	CC	GG	CC	GG	CC	GG	GG	GG	CC	GG	GG	CC	CC	CC	CC	GG	CC	GG	GG	GG	GG	GG	GG	CC	GG	CC	GG	GG	CC	GG
AX-94705421	2A	59554433	C/T	CC	TT	TT	TT	CC	TT	CC	CC	CC	CC	CC	CC	CC	CC	TT	CC	CC	TT	CC	TT	TT	TT	TT	TT	CC	TT	CC	TT	TT	CC	CC	TT	CC	CC	TT	CC	TT	CC	TT	CC	TT	CC	CC	TT	TT	TT
AX-95019864	2A	59724562	C/T	CC	TT	CC	TT	CC	CC	CC	CC	CC	CC	CC	CC	CC	CC	CC	CC	CC	TT	CC	CC	CC	CC	TT	TT	CC	CC	CC	CC	CC	CC	CC	TT	CC	CC	CC	CC	CC	CC	TT	CC	TT	CC	CC	CC	CC	TT
AX-94790773	2A	60259036	T/C	TT	CC	CC	CC	TT	CC	TT	TT	TT	CC	TT	TT	TT	CC	CC	TT	TT	CC	TT	CC	CC	CC	CC	CC	TT	CC	TT	CC	CC	TT	TT	CC	TT	TT	CC	TT	CC	TT	CC	TT	CC	TT	TT	CC	CC	CC
AX-95207987	2A	61287647	G/A	GG	AA	AA	AA	GG	AA	GG	GG	GG	AA	GG	GG	GG	AA	AA	GG	GG	AA	GG	AA	AA	AA	AA	AA	GG	AA	GG	AA	AA	GG	GG	AA	GG	GG	AA	GG	AA	GG	AA	GG	AA	GG	GG	AA	AA	AA
AX-94626174	2A	65355872	G/A	GG	AA	GG	GG	GG	GG	GG	GG	AA	GG	GG	GG	AA	GG	GG	GG	GG	AA	GG	GG	GG	GG	GG	GG	GG	GG	AA	GG	GG	GG	GG	GG	GG	GG	AA	GG	GG	GG	GG	GG	GG	GG	GG	AA	GG	GG
AX-95231147	2A	65821104	G/C	CC	GG	CC	GG	CC	GG	CC	GG	GG	GG	GG	GG	GG	GG	CC	CC	GG	CC	CC	GG	CC	GG	GG	GG	GG	CC	GG	GG	GG	CC	CC	CC	GG	CC	GG	GG	GG	GG	CC	CC	GG	CC	GG	GG	CC	CC
AX-94601576	2A	70229808	C/T	CC	TT	CC	CC	CC	TT	CC	CC	CC	TT	CC	CC	CC	TT	CC	CC	CC	CC	CC	CC	CC	CC	CC	CC	CC	CC	CC	CC	TT	CC	CC	CC	CC	CC	CC	CC	CC	CC	CC	CC	CC	CC	CC	CC	CC	CC
AX-94542840	2A	71308128	A/C	CC	CC	AA	AA	AA	AA	AA	AA	AA	CC	AA	AA	AA	CC	AA	AA	AA	AA	AA	CC	AA	CC	CC	AA	AA	AA	AA	AA	AA	AA	AA	AA	AA	AA	CC	AA	CC	AA	AA	AA	AA	AA	AA	CC	AA	AA
AX-94470548	2A	71666445	C/T	CC	TT	CC	CC	CC	CC	CC	CC	CC	TT	CC	CC	CC	TT	CC	CC	CC	CC	CC	TT	CC	TT	CC	CC	CC	CC	CC	CC	CC	CC	CC	CC	CC	CC	TT	CC	TT	CC	CC	CC	CC	CC	CC	TT	CC	CC
AX-94555263	2A	75292086	C/T	TT	TT	TT	TT	CC	TT	CC	TT	TT	CC	CC	CC	CC	CC	TT	CC	CC	TT	CC	CC	TT	CC	TT	TT	CC	TT	TT	TT	TT	TT	CC	CC	CC	CC	CC	TT	CC	TT	CC	CC	TT	CC	TT	CC	CC	TT
AX-94548795	2A	77757189	G/T	GG	GG	GG	GG	TT	GG	TT	GG	GG	GG	TT	GG	GG	GG	GG	TT	TT	GG	TT	GG	GG	GG	GG	GG	GG	GG	GG	GG	GG	GG	TT	TT	GG	TT	GG	GG	GG	GG	TT	TT	GG	TT	GG	GG	TT	GG
AX-94850365	2A	78598937	G/A	GG	AA	AA	AA	GG	GG	GG	AA	AA	AA	GG	AA	GG	AA	AA	GG	GG	AA	GG	GG	AA	GG	AA	AA	AA	AA	AA	AA	GG	AA	GG	GG	AA	GG	GG	AA	GG	AA	GG	GG	AA	GG	AA	GG	GG	AA
AX-95116848	2A	79748553	G/A	GG	GG	GG	GG	GG	AA	GG	AA	GG	AA	GG	GG	AA	AA	AA	GG	GG	GG	GG	GG	GG	GG	GG	GG	GG	AA	GG	GG	AA	AA	GG	GG	GG	GG	GG	AA	GG	AA	GG	GG	GG	GG	AA	GG	GG	GG
AX-94746210	2A	80476304	G/C	GG	GG	GG	GG	GG	CC	GG	CC	GG	CC	GG	GG	CC	CC	CC	GG	GG	GG	GG	GG	GG	GG	GG	GG	GG	CC	GG	GG	CC	CC	GG	GG	GG	GG	GG	CC	GG	CC	GG	GG	GG	GG	CC	GG	GG	GG
AX-94410389	2A	80871485	C/T	CC	CC	CC	CC	TT	CC	TT	TT	CC	CC	TT	CC	TT	CC	TT	TT	TT	CC	TT	CC	CC	CC	CC	CC	CC	TT	CC	CC	CC	TT	TT	TT	CC	TT	CC	TT	CC	TT	TT	TT	CC	TT	TT	CC	TT	CC
AX-94559183	2A	81726961	G/A	GG	GG	GG	GG	GG	GG	GG	GG	GG	GG	GG	AA	GG	GG	GG	GG	GG	GG	GG	GG	GG	GG	AA	GG	GG	GG	GG	GG	GG	GG	GG	GG	AA	GG	GG	GG	GG	GG	GG	GG	GG	GG	GG	GG	GG	GG
AX-95133576	2A	82130446	T/C	CC	CC	TT	TT	TT	TT	TT	CC	CC	TT	TT	TT	CC	TT	CC	TT	TT	CC	TT	CC	TT	CC	CC	TT	TT	CC	CC	TT	TT	CC	TT	TT	TT	TT	CC	CC	TT	CC	TT	TT	TT	CC	CC	CC	TT	TT
AX-95192564	2A	82345339	C/T	TT	CC	CC	CC	CC	CC	CC	TT	CC	CC	CC	CC	TT	CC	TT	CC	CC	CC	CC	CC	CC	CC	CC	CC	CC	TT	CC	CC	CC	TT	CC	CC	CC	CC	CC	TT	CC	TT	CC	CC	CC	CC	TT	CC	CC	CC
AX-95255100	2A	88016012	T/C	TT	TT	TT	TT	TT	TT	TT	CC	TT	TT	TT	TT	CC	TT	CC	TT	TT	TT	TT	CC	TT	CC	TT	TT	TT	CC	TT	TT	TT	CC	TT	TT	TT	TT	CC	CC	CC	CC	TT	TT	TT	TT	CC	CC	TT	TT
AX-95126515	2A	88670897	A/G	AA	GG	AA	AA	AA	AA	AA	AA	AA	AA	AA	AA	GG	AA	AA	AA	AA	GG	AA	GG	AA	GG	GG	AA	AA	AA	AA	AA	AA	AA	AA	AA	AA	AA	GG	AA	AA	AA	AA	AA	AA	GG	AA	GG	AA	AA
AX-94634529	2A	93190895	C/T	CC	TT	CC	CC	TT	TT	TT	TT	TT	CC	TT	TT	TT	CC	CC	TT	CC	TT	CC	CC	CC	CC	TT	CC	TT	CC	TT	CC	CC	CC	CC	CC	TT	TT	CC	CC	CC	TT	CC	CC	CC	TT	TT	TT	CC	TT
AX-95120495	2A	99159353	G/T	TT	GG	GG	GG	GG	TT	GG	TT	GG	GG	GG	GG	TT	GG	TT	GG	GG	GG	GG	TT	GG	TT	GG	GG	GG	TT	GG	GG	TT	TT	GG	GG	GG	GG	TT	TT	TT	TT	GG	GG	GG	GG	TT	TT	GG	GG
AX-94533050	2A	101536665	T/C	TT	TT	TT	TT	TT	TT	TT	TT	CC	TT	TT	TT	TT	TT	TT	TT	TT	TT	TT	CC	TT	CC	TT	TT	TT	TT	CC	TT	TT	TT	TT	TT	TT	TT	CC	TT	TT	TT	TT	TT	TT	TT	TT	CC	TT	TT
AX-94938670	2A	101912213	G/A	GG	GG	GG	GG	GG	GG	GG	GG	GG	AA	GG	AA	GG	AA	GG	GG	AA	GG	GG	GG	GG	GG	AA	GG	GG	GG	GG	GG	GG	GG	GG	GG	AA	GG	GG	GG	GG	GG	GG	GG	GG	GG	GG	GG	GG	GG
AX-95150125	2A	107220002	T/C	TT	TT	TT	TT	TT	TT	TT	TT	TT	TT	TT	CC	TT	TT	TT	TT	TT	TT	TT	TT	TT	TT	CC	TT	TT	TT	NN	TT	TT	TT	TT	TT	CC	TT	TT	TT	TT	TT	TT	TT	TT	TT	TT	TT	TT	TT
AX-94932952	2A	108247766	C/T	CC	CC	TT	TT	CC	TT	CC	CC	CC	CC	CC	TT	CC	CC	CC	CC	TT	TT	CC	CC	TT	CC	CC	CC	CC	CC	CC	TT	CC	CC	CC	CC	TT	TT	CC	TT	CC	CC	TT	CC	TT	CC	CC	TT	TT	TT
AX-94574920	2A	113818700	C/G	CC	GG	GG	GG	CC	CC	CC	CC	CC	CC	CC	CC	CC	CC	CC	CC	CC	GG	CC	CC	GG	CC	CC	CC	CC	CC	CC	GG	CC	CC	CC	CC	CC	CC	CC	CC	CC	CC	CC	CC	GG	CC	CC	CC	CC	GG
AX-94892474	2A	117180842	G/T	GG	TT	TT	TT	GG	GG	GG	GG	GG	GG	GG	TT	GG	GG	GG	GG	GG	TT	GG	GG	TT	GG	TT	GG	GG	GG	GG	TT	GG	GG	GG	GG	TT	GG	GG	GG	GG	GG	GG	GG	TT	GG	GG	GG	GG	TT
AX-94457129	2A	119314197	C/T	CC	TT	TT	TT	CC	CC	CC	CC	CC	CC	CC	TT	CC	TT	CC	CC	CC	TT	CC	CC	TT	CC	TT	CC	CC	CC	TT	NN	CC	CC	CC	CC	TT	CC	CC	CC	CC	CC	CC	CC	TT	CC	CC	CC	CC	TT
AX-94729084	2A	148853107	A/C	AA	CC	CC	CC	AA	AA	AA	AA	CC	CC	AA	CC	AA	CC	AA	AA	AA	CC	AA	AA	CC	AA	CC	AA	CC	AA	CC	CC	AA	AA	AA	AA	CC	AA	AA	CC	AA	AA	AA	AA	CC	AA	AA	CC	AA	CC
AX-95630237	2A	148866342	A/G	AA	AA	AA	AA	AA	AA	GG	AA	AA	GG	GG	AA	AA	GG	GG	AA	GG	AA	AA	AA	AA	AA	AA	AA	AA	AA	AA	AA	AA	AA	AA	AA	AA	GG	AA	AA	AA	AA	AA	AA	AA	AA	AA	AA	AA	AA
AX-94707695	2A	153452640	A/G	AA	AA	AA	AA	AA	AA	AA	GG	AA	AA	AA	AA	GG	AA	GG	AA	AA	AA	AA	GG	AA	GG	AA	GG	AA	GG	AA	AA	AA	GG	AA	AA	AA	AA	GG	AA	GG	GG	AA	AA	AA	AA	GG	AA	AA	AA
AX-94774467	2A	156668492	G/T	GG	TT	TT	TT	TT	GG	TT	GG	GG	GG	TT	TT	GG	TT	GG	TT	TT	TT	TT	GG	TT	GG	TT	GG	GG	GG	GG	TT	GG	GG	TT	TT	TT	TT	GG	GG	GG	GG	TT	TT	TT	TT	GG	TT	TT	TT
AX-94517404	2A	162563695	T/C	TT	TT	TT	CC	TT	TT	TT	CC	TT	TT	TT	TT	CC	CC	CC	TT	CC	TT	TT	TT	TT	TT	CC	TT	TT	CC	TT	TT	CC	TT	TT	TT	TT	TT	TT	CC	TT	CC	TT	TT	TT	TT	CC	TT	CC	TT
AX-94705914	2A	166848332	C/T	CC	CC	CC	CC	TT	CC	TT	CC	CC	CC	TT	TT	CC	TT	CC	TT	TT	TT	TT	CC	CC	CC	TT	CC	CC	CC	CC	CC	CC	CC	TT	TT	TT	TT	CC	CC	CC	CC	TT	TT	CC	TT	CC	TT	TT	CC
AX-95115244	2A	181796840	G/A	GG	GG	GG	GG	AA	GG	AA	GG	GG	AA	AA	AA	GG	AA	GG	AA	AA	AA	AA	GG	GG	GG	AA	GG	GG	GG	GG	GG	GG	GG	AA	AA	AA	AA	GG	GG	GG	GG	AA	AA	GG	AA	GG	AA	AA	GG
AX-94459200	2A	182283322	T/C	TT	TT	TT	TT	TT	TT	TT	CC	TT	CC	TT	CC	CC	CC	TT	CC	CC	CC	CC	TT	TT	TT	CC	TT	TT	TT	TT	TT	TT	TT	CC	CC	CC	TT	TT	TT	CC	TT	CC	CC	TT	TT	CC	CC	CC	TT
AX-94538966	2A	187481961	A/C	AA	AA	AA	AA	AA	AA	AA	CC	AA	AA	AA	AA	AA	AA	CC	AA	AA	AA	AA	AA	CC	AA	AA	AA	AA	AA	AA	AA	AA	AA	CC	AA	AA	AA	AA	AA	AA	CC	AA	AA	AA	AA	AA	AA	CC	AA
AX-95174829	2A	194679385	A/G	AA	GG	GG	GG	AA	AA	AA	AA	AA	AA	AA	AA	AA	AA	AA	AA	AA	AA	AA	AA	GG	AA	AA	GG	AA	AA	AA	GG	AA	AA	AA	AA	AA	AA	AA	AA	AA	AA	AA	AA	GG	AA	AA	AA	AA	GG
AX-94507869	2A	199032681	C/T	CC	CC	CC	CC	CC	CC	CC	CC	CC	CC	CC	CC	TT	CC	CC	CC	CC	TT	CC	TT	CC	TT	CC	CC	CC	CC	CC	CC	CC	CC	CC	CC	CC	CC	TT	CC	CC	CC	CC	CC	CC	CC	CC	TT	CC	TT
AX-94431383	2A	202045904	A/G	AA	GG	GG	GG	AA	AA	AA	AA	AA	AA	AA	AA	AA	AA	AA	AA	AA	AA	AA	AA	GG	AA	AA	GG	AA	AA	AA	GG	AA	AA	AA	AA	AA	AA	AA	AA	AA	AA	AA	AA	GG	AA	AA	AA	AA	GG
AX-94406674	2A	232369994	T/C	TT	CC	CC	CC	TT	TT	TT	TT	TT	TT	TT	TT	TT	TT	TT	TT	TT	TT	TT	TT	CC	TT	TT	CC	TT	TT	TT	CC	TT	TT	TT	TT	TT	TT	TT	TT	TT	TT	TT	TT	CC	TT	TT	TT	TT	CC
AX-94402263	2A	278446320	C/G	CC	GG	GG	GG	CC	CC	CC	GG	CC	GG	CC	CC	GG	GG	CC	GG	GG	CC	CC	CC	GG	CC	GG	GG	CC	CC	CC	GG	CC	CC	GG	CC	CC	CC	CC	CC	GG	CC	CC	GG	GG	CC	GG	CC	GG	GG
AX-94521061	2A	284611621	A/G	AA	GG	GG	GG	AA	AA	AA	AA	AA	AA	AA	AA	AA	AA	AA	AA	AA	AA	AA	AA	GG	AA	AA	GG	AA	AA	AA	GG	AA	AA	AA	AA	AA	AA	AA	AA	AA	AA	AA	AA	GG	AA	AA	AA	AA	GG
AX-94949809	2A	341627914	A/G	AA	AA	AA	AA	AA	AA	AA	GG	AA	GG	AA	AA	GG	GG	AA	GG	GG	AA	AA	AA	AA	AA	GG	AA	AA	AA	GG	AA	AA	AA	GG	AA	AA	AA	AA	AA	GG	AA	AA	GG	AA	AA	GG	AA	GG	AA
AX-94862277	2A	414990028	A/G	AA	AA	AA	AA	AA	AA	AA	GG	AA	GG	AA	AA	GG	GG	AA	GG	GG	AA	AA	AA	AA	AA	GG	AA	AA	AA	AA	AA	AA	AA	GG	AA	AA	AA	AA	AA	GG	AA	AA	GG	AA	AA	GG	AA	GG	AA
AX-94614181	2A	495959178	C/A	AA	CC	CC	CC	CC	AA	CC	CC	CC	CC	CC	AA	CC	CC	AA	AA	CC	AA	CC	AA	CC	AA	CC	CC	CC	AA	CC	NN	AA	AA	CC	CC	AA	CC	AA	CC	CC	AA	CC	AA	CC	CC	CC	AA	CC	CC
AX-94490884	2A	504285062	G/A	GG	AA	AA	AA	GG	GG	GG	GG	GG	GG	GG	GG	GG	GG	GG	GG	GG	GG	GG	GG	AA	GG	GG	AA	GG	GG	GG	AA	GG	GG	GG	GG	GG	GG	GG	GG	GG	GG	GG	GG	AA	GG	GG	GG	GG	AA
AX-94468166	2A	505210292	C/A	CC	CC	CC	CC	AA	CC	AA	CC	AA	CC	AA	CC	CC	CC	CC	CC	CC	CC	AA	CC	CC	CC	CC	CC	AA	CC	AA	CC	CC	CC	CC	AA	CC	AA	CC	AA	CC	CC	AA	CC	CC	AA	CC	CC	CC	CC
AX-94661620	2A	507159233	C/G	CC	CC	CC	CC	GG	CC	GG	GG	GG	GG	GG	CC	GG	GG	CC	CC	GG	CC	GG	CC	CC	CC	GG	CC	GG	CC	GG	CC	CC	CC	GG	GG	CC	GG	CC	GG	GG	CC	GG	CC	CC	GG	GG	CC	GG	CC
AX-95238660	2A	515452422	T/G	GG	TT	TT	TT	TT	GG	TT	TT	TT	TT	TT	GG	TT	TT	GG	GG	TT	GG	TT	GG	TT	GG	TT	TT	TT	GG	TT	TT	GG	GG	TT	TT	GG	TT	GG	TT	TT	GG	TT	GG	TT	TT	TT	GG	TT	TT
AX-95153321	2A	521324681	C/T	CC	CC	TT	CC	CC	CC	CC	CC	CC	TT	TT	CC	CC	CC	CC	CC	TT	CC	CC	CC	CC	CC	CC	CC	CC	CC	CC	TT	CC	CC	CC	CC	CC	CC	CC	TT	CC	CC	CC	CC	CC	CC	CC	CC	CC	CC
AX-94583630	2A	526299707	C/T	CC	CC	CC	CC	CC	CC	CC	CC	CC	CC	CC	CC	TT	CC	CC	CC	CC	CC	CC	TT	CC	TT	CC	TT	CC	CC	CC	CC	CC	CC	CC	CC	CC	CC	TT	CC	TT	CC	CC	CC	CC	CC	CC	TT	CC	CC
AX-94928910	2A	526299828	C/T	CC	CC	CC	CC	CC	CC	CC	CC	CC	CC	CC	CC	TT	CC	CC	CC	CC	CC	CC	TT	CC	TT	CC	TT	CC	CC	CC	CC	CC	CC	CC	CC	CC	CC	TT	CC	TT	CC	CC	CC	CC	CC	CC	TT	CC	CC
AX-95095516	2A	527920876	A/C	CC	AA	AA	AA	AA	CC	AA	AA	AA	AA	AA	CC	AA	AA	CC	CC	AA	CC	AA	CC	AA	CC	AA	AA	AA	CC	AA	AA	CC	CC	AA	AA	CC	AA	CC	AA	AA	CC	AA	CC	AA	AA	AA	CC	AA	AA
AX-95152254	2A	539013195	A/G	AA	GG	GG	GG	AA	AA	AA	AA	AA	AA	AA	AA	AA	AA	AA	AA	AA	AA	AA	AA	GG	AA	AA	GG	AA	AA	AA	GG	AA	AA	AA	AA	AA	AA	AA	AA	AA	AA	AA	AA	GG	AA	AA	AA	AA	GG
AX-94906479	2A	543306850	G/A	GG	GG	GG	GG	GG	GG	GG	AA	GG	AA	GG	GG	AA	AA	GG	GG	AA	GG	GG	GG	GG	GG	AA	GG	GG	GG	GG	GG	GG	GG	AA	GG	GG	GG	GG	GG	AA	GG	GG	GG	GG	GG	AA	GG	AA	GG
AX-94457898	2A	543625459	T/C	CC	TT	TT	TT	TT	CC	TT	TT	TT	TT	TT	CC	TT	TT	CC	CC	TT	CC	TT	CC	TT	CC	TT	TT	TT	CC	TT	TT	CC	CC	TT	TT	CC	TT	CC	TT	TT	CC	TT	CC	TT	TT	TT	CC	TT	TT
AX-94685900	2A	544285102	T/G	TT	TT	GG	GG	GG	TT	GG	TT	GG	TT	GG	TT	TT	TT	TT	TT	TT	TT	GG	TT	GG	TT	TT	GG	GG	TT	GG	GG	TT	TT	TT	GG	TT	GG	TT	GG	TT	TT	GG	TT	GG	GG	TT	TT	TT	GG
AX-94738148	2A	558526591	C/T	CC	TT	CC	CC	CC	CC	CC	TT	CC	TT	CC	CC	TT	TT	CC	CC	TT	CC	CC	CC	CC	CC	TT	CC	CC	CC	CC	CC	CC	CC	TT	CC	CC	CC	CC	CC	TT	CC	CC	CC	CC	CC	TT	CC	TT	TT
AX-95218051	2A	562508491	C/T	TT	CC	CC	CC	CC	TT	CC	CC	CC	CC	CC	TT	CC	CC	TT	TT	CC	TT	CC	TT	CC	TT	CC	CC	CC	TT	CC	CC	TT	TT	CC	CC	TT	CC	TT	CC	CC	TT	CC	TT	CC	CC	CC	TT	CC	CC
AX-94397781	2A	563939706	T/C	TT	CC	TT	CC	TT	TT	TT	TT	CC	CC	CC	TT	TT	CC	TT	TT	TT	TT	TT	CC	TT	TT	TT	CC	TT	TT	CC	TT	TT	TT	TT	TT	TT	TT	CC	TT	TT	TT	TT	TT	CC	TT	CC	TT	TT	TT
AX-94562284	2A	568294531	C/T	TT	CC	TT	TT	CC	CC	TT	CC	CC	CC	TT	CC	CC	CC	TT	TT	TT	CC	TT	TT	TT	CC	CC	TT	CC	TT	CC	TT	TT	TT	TT	CC	CC	TT	CC	CC	CC	CC	TT	CC	TT	TT	CC	CC	CC	CC
AX-94945347	2A	570608634	T/C	CC	TT	CC	TT	CC	CC	CC	TT	TT	CC	CC	TT	TT	TT	TT	TT	CC	TT	TT	TT	TT	TT	TT	TT	TT	TT	CC	CC	TT	TT	TT	TT	CC	TT	TT	TT	TT	TT	TT	TT	CC	TT	TT	CC	TT	TT
AX-94848798	2A	574976385	C/T	TT	CC	CC	CC	CC	TT	CC	CC	CC	CC	CC	TT	CC	CC	TT	TT	CC	TT	CC	TT	CC	TT	CC	CC	CC	TT	CC	CC	TT	TT	CC	CC	TT	CC	TT	CC	CC	TT	CC	TT	CC	CC	CC	TT	CC	CC
AX-95142099	2A	581168005	C/T	TT	CC	TT	CC	CC	CC	CC	CC	CC	TT	CC	CC	CC	CC	CC	CC	CC	TT	CC	TT	TT	CC	CC	CC	CC	CC	TT	TT	CC	CC	TT	CC	CC	CC	CC	CC	CC	CC	CC	CC	CC	CC	CC	CC	CC	TT
AX-95661975	2A	581964676	A/G	GG	AA	AA	AA	AA	AA	AA	AA	AA	AA	AA	AA	AA	AA	AA	AA	AA	AA	AA	GG	AA	GG	AA	AA	AA	AA	AA	AA	AA	AA	GG	AA	AA	AA	GG	AA	AA	AA	AA	AA	AA	AA	AA	GG	AA	AA
AX-95108722	2A	585206888	T/G	GG	TT	TT	TT	TT	GG	TT	TT	TT	TT	TT	GG	TT	TT	TT	GG	TT	GG	TT	GG	TT	GG	TT	TT	TT	GG	TT	TT	GG	TT	TT	TT	GG	TT	GG	TT	TT	TT	TT	GG	TT	TT	TT	GG	TT	TT
AX-94835663	2A	586456865	C/G	GG	CC	CC	CC	CC	GG	CC	CC	CC	CC	CC	GG	CC	CC	CC	GG	CC	GG	CC	CC	CC	CC	CC	CC	CC	CC	CC	CC	GG	CC	CC	CC	GG	CC	CC	CC	CC	CC	CC	GG	CC	CC	CC	CC	CC	CC
AX-95243730	2A	593823449	C/A	CC	CC	CC	CC	CC	CC	CC	CC	CC	CC	CC	CC	CC	AA	CC	CC	AA	CC	CC	CC	CC	CC	AA	CC	AA	CC	CC	CC	CC	CC	CC	CC	CC	AA	CC	AA	CC	CC	CC	CC	CC	CC	CC	CC	CC	AA
AX-94514944	2A	605000772	G/T	TT	TT	GG	GG	GG	TT	GG	GG	GG	GG	GG	TT	GG	GG	GG	TT	GG	TT	GG	TT	GG	TT	GG	GG	GG	TT	GG	GG	TT	GG	TT	GG	TT	GG	TT	GG	GG	GG	GG	TT	GG	GG	GG	TT	GG	TT
AX-95629940	2A	607827229	A/G	AA	AA	GG	GG	AA	AA	AA	GG	GG	GG	AA	AA	GG	AA	AA	AA	AA	AA	AA	AA	GG	AA	AA	GG	GG	AA	GG	GG	AA	AA	AA	AA	AA	AA	AA	AA	GG	AA	AA	AA	GG	AA	GG	AA	AA	AA
AX-94554149	2A	607915096	C/T	CC	TT	CC	CC	CC	CC	CC	CC	CC	TT	CC	CC	CC	TT	CC	CC	CC	CC	CC	TT	CC	TT	CC	CC	CC	CC	CC	CC	CC	CC	CC	CC	CC	CC	TT	CC	TT	CC	CC	CC	CC	CC	CC	TT	CC	CC
AX-94718925	2A	610987686	T/C	CC	NN	TT	TT	TT	CC	TT	TT	TT	TT	TT	CC	TT	TT	CC	CC	TT	CC	TT	CC	TT	CC	TT	TT	TT	CC	TT	TT	CC	CC	TT	TT	CC	TT	CC	TT	TT	CC	TT	CC	TT	TT	TT	CC	TT	TT
AX-95166962	2A	611353800	T/C	CC	TT	TT	TT	TT	CC	TT	TT	TT	CC	TT	CC	TT	TT	TT	CC	TT	CC	TT	TT	TT	TT	TT	TT	TT	TT	TT	TT	CC	TT	CC	TT	CC	TT	TT	TT	TT	TT	TT	CC	TT	TT	TT	TT	TT	TT
AX-95076860	2A	611946524	T/C	CC	TT	CC	CC	TT	CC	TT	TT	CC	CC	TT	CC	TT	TT	TT	CC	TT	CC	TT	TT	CC	TT	TT	CC	CC	TT	CC	CC	CC	TT	CC	TT	CC	TT	TT	TT	TT	TT	TT	CC	CC	TT	TT	TT	TT	TT
AX-94443142	2A	612082151	A/G	AA	AA	GG	GG	AA	AA	AA	AA	GG	AA	AA	AA	AA	AA	AA	AA	AA	AA	AA	AA	GG	AA	AA	GG	GG	AA	GG	GG	AA	AA	AA	AA	AA	AA	AA	AA	AA	AA	AA	AA	GG	AA	AA	AA	AA	AA
AX-95126957	2A	612845045	T/C	TT	TT	CC	CC	CC	TT	CC	TT	CC	TT	CC	TT	TT	CC	CC	TT	TT	TT	CC	TT	CC	TT	TT	CC	CC	TT	CC	CC	TT	CC	TT	CC	TT	CC	TT	TT	TT	TT	CC	TT	CC	CC	TT	TT	TT	TT
AX-94555534	2A	618283161	C/T	CC	CC	TT	TT	TT	CC	TT	CC	TT	CC	TT	CC	CC	TT	TT	CC	CC	CC	TT	CC	TT	CC	TT	TT	TT	CC	TT	TT	CC	TT	CC	TT	CC	TT	CC	CC	CC	TT	TT	CC	TT	TT	CC	CC	CC	TT
AX-94390510	2A	622456922	A/G	GG	AA	AA	AA	AA	GG	AA	AA	AA	GG	AA	GG	AA	AA	AA	GG	GG	GG	AA	GG	AA	GG	AA	AA	AA	GG	AA	AA	GG	AA	GG	AA	GG	AA	GG	GG	AA	AA	AA	GG	AA	AA	AA	GG	GG	AA
AX-94809384	2A	628095755	C/G	GG	GG	GG	CC	CC	CC	GG	GG	GG	GG	CC	CC	CC	CC	GG	CC	CC	CC	CC	CC	CC	CC	CC	CC	CC	CC	CC	GG	CC	CC	GG	CC	CC	CC	CC	CC	CC	CC	GG	CC	CC	GG	GG	CC	CC	CC
AX-94413813	2A	633241044	A/G	AA	GG	AA	AA	AA	AA	AA	AA	GG	GG	AA	AA	AA	AA	AA	AA	AA	AA	AA	GG	AA	GG	AA	AA	AA	AA	GG	AA	AA	AA	AA	AA	AA	AA	GG	AA	GG	AA	AA	GG	AA	AA	AA	NN	AA	AA
AX-95158061	2A	633242042	T/C	TT	TT	TT	TT	TT	CC	TT	TT	TT	CC	TT	CC	TT	TT	TT	CC	TT	CC	TT	TT	TT	TT	TT	TT	TT	TT	TT	TT	CC	TT	TT	TT	CC	TT	TT	TT	TT	TT	TT	TT	TT	TT	TT	TT	TT	TT
AX-94955089	2A	642916029	A/G	AA	AA	AA	AA	AA	AA	AA	AA	AA	AA	AA	AA	AA	AA	AA	AA	AA	AA	AA	GG	AA	GG	AA	AA	AA	AA	AA	AA	AA	AA	AA	AA	AA	AA	GG	AA	AA	AA	AA	AA	AA	AA	AA	GG	AA	AA
AX-95197988	2A	647927331	A/C	CC	CC	AA	AA	AA	CC	AA	CC	AA	CC	AA	CC	CC	AA	AA	CC	AA	CC	AA	CC	AA	CC	CC	AA	AA	AA	AA	AA	CC	AA	CC	AA	CC	AA	CC	AA	CC	AA	AA	AA	AA	AA	CC	CC	AA	AA
AX-94776946	2A	647927940	C/T	TT	TT	CC	CC	CC	TT	CC	TT	CC	TT	CC	TT	TT	CC	CC	TT	CC	TT	CC	TT	CC	TT	TT	CC	CC	CC	CC	CC	TT	CC	TT	CC	TT	CC	TT	CC	TT	CC	CC	CC	CC	CC	TT	TT	CC	CC
AX-94841777	2A	651607739	A/G	GG	AA	AA	AA	AA	AA	AA	AA	AA	AA	AA	AA	AA	AA	AA	AA	AA	AA	AA	GG	AA	GG	AA	AA	AA	AA	AA	AA	AA	AA	GG	AA	AA	AA	GG	AA	AA	AA	AA	AA	AA	AA	AA	GG	AA	AA
AX-94884555	2A	655547729	T/C	CC	TT	TT	TT	TT	TT	TT	TT	TT	TT	TT	TT	TT	TT	TT	TT	TT	TT	TT	CC	TT	CC	CC	TT	TT	TT	TT	TT	TT	TT	CC	TT	TT	TT	CC	TT	TT	TT	TT	TT	TT	TT	TT	CC	TT	CC
AX-94860603	2A	663328932	C/A	AA	AA	CC	CC	CC	AA	CC	AA	CC	AA	CC	AA	AA	CC	CC	AA	CC	AA	CC	AA	CC	AA	AA	CC	CC	CC	CC	CC	AA	CC	AA	CC	AA	CC	AA	CC	AA	CC	CC	CC	CC	CC	AA	AA	CC	AA
AX-94672269	2A	670230198	G/C	CC	GG	GG	GG	GG	GG	GG	GG	GG	GG	GG	GG	GG	GG	GG	GG	GG	GG	GG	CC	GG	CC	GG	GG	GG	GG	GG	GG	GG	GG	CC	GG	GG	GG	CC	GG	GG	GG	GG	GG	GG	GG	GG	CC	GG	CC
AX-94635076	2A	672748753	A/C	AA	AA	AA	CC	AA	CC	AA	AA	CC	CC	AA	CC	AA	CC	AA	AA	AA	CC	AA	CC	AA	CC	CC	CC	AA	AA	CC	AA	CC	AA	AA	AA	CC	AA	CC	AA	CC	CC	CC	AA	CC	AA	AA	CC	AA	AA
AX-94994572	2A	674125212	A/G	GG	AA	GG	AA	GG	AA	GG	AA	AA	AA	AA	AA	AA	AA	GG	GG	AA	GG	GG	AA	GG	AA	AA	AA	AA	GG	AA	AA	AA	GG	GG	GG	AA	GG	AA	AA	AA	AA	GG	GG	AA	GG	AA	AA	GG	GG
AX-95094317	2A	674418771	G/T	TT	TT	GG	GG	GG	GG	GG	TT	TT	TT	GG	TT	TT	GG	GG	TT	GG	TT	GG	GG	GG	GG	GG	GG	GG	GG	TT	GG	TT	GG	TT	GG	TT	GG	GG	GG	TT	GG	GG	GG	GG	GG	TT	GG	TT	GG
AX-94584110	2A	677886809	A/G	AA	GG	GG	AA	AA	AA	AA	GG	GG	AA	AA	AA	GG	GG	GG	AA	AA	AA	GG	AA	AA	AA	GG	AA	AA	GG	GG	GG	AA	GG	AA	GG	AA	AA	AA	AA	GG	AA	GG	GG	AA	AA	GG	AA	AA	GG
AX-94680452	2A	678362163	C/T	CC	CC	TT	CC	TT	CC	TT	CC	CC	CC	TT	CC	TT	TT	TT	CC	CC	CC	TT	CC	CC	CC	TT	CC	CC	TT	CC	TT	CC	TT	CC	TT	CC	TT	CC	CC	CC	CC	TT	TT	CC	TT	CC	CC	CC	CC
AX-94595097	2A	679230166	G/A	AA	GG	GG	GG	GG	GG	AA	GG	AA	GG	AA	GG	GG	GG	GG	GG	GG	GG	GG	GG	GG	GG	GG	GG	GG	GG	GG	AA	GG	GG	GG	GG	GG	AA	GG	GG	GG	GG	NN	GG	GG	GG	AA	GG	GG	GG
AX-95160129	2A	680365254	T/G	GG	GG	TT	GG	TT	TT	TT	TT	GG	GG	TT	GG	TT	TT	TT	GG	TT	GG	TT	GG	TT	GG	GG	GG	TT	TT	GG	TT	GG	TT	TT	TT	GG	TT	GG	TT	TT	TT	TT	TT	GG	TT	TT	GG	GG	TT
AX-95138846	2A	685223693	C/A	AA	AA	CC	CC	CC	CC	CC	AA	AA	CC	CC	CC	CC	CC	CC	AA	CC	CC	CC	AA	CC	AA	AA	AA	AA	CC	AA	CC	CC	CC	CC	CC	CC	CC	AA	CC	AA	CC	CC	CC	CC	CC	AA	AA	AA	AA
AX-94648074	2A	685776769	C/T	CC	CC	CC	CC	CC	CC	CC	CC	CC	CC	CC	CC	CC	CC	CC	CC	CC	CC	CC	TT	CC	TT	CC	CC	CC	CC	CC	CC	CC	CC	CC	CC	CC	CC	TT	CC	TT	CC	CC	TT	CC	CC	CC	TT	CC	CC
AX-94629308	2A	691184196	T/C	CC	TT	CC	TT	CC	TT	CC	TT	TT	TT	CC	TT	CC	CC	CC	TT	CC	TT	CC	TT	CC	TT	TT	TT	TT	CC	TT	CC	TT	CC	CC	TT	TT	CC	TT	CC	TT	TT	TT	CC	TT	CC	TT	TT	TT	TT
AX-95114316	2A	692530639	T/C	TT	TT	TT	TT	TT	TT	TT	TT	CC	TT	TT	CC	TT	TT	TT	CC	TT	TT	TT	TT	TT	TT	TT	TT	TT	TT	CC	TT	CC	TT	TT	TT	TT	TT	TT	TT	TT	CC	TT	TT	TT	TT	TT	TT	CC	TT
AX-94668676	2A	693241912	C/T	CC	TT	CC	CC	CC	CC	CC	TT	TT	CC	CC	TT	CC	CC	CC	TT	CC	CC	CC	CC	CC	CC	CC	CC	TT	CC	TT	CC	TT	CC	CC	CC	CC	CC	CC	CC	CC	TT	CC	CC	CC	CC	TT	CC	TT	TT
AX-94471569	2A	693285952	G/C	GG	GG	GG	CC	GG	CC	GG	GG	GG	CC	GG	GG	GG	GG	GG	GG	CC	CC	GG	CC	GG	CC	CC	CC	GG	GG	GG	GG	GG	GG	GG	CC	CC	GG	CC	CC	CC	GG	CC	GG	CC	GG	GG	CC	GG	GG
AX-94653560	2A	693293914	G/C	CC	GG	CC	GG	CC	GG	CC	GG	CC	GG	CC	CC	CC	CC	CC	CC	GG	GG	CC	GG	CC	GG	GG	GG	GG	CC	CC	CC	CC	CC	CC	GG	GG	CC	GG	GG	GG	GG	GG	CC	GG	CC	GG	GG	CC	GG
AX-94799523	2A	694589173	G/T	GG	TT	GG	GG	GG	GG	GG	TT	GG	GG	GG	GG	GG	GG	GG	GG	GG	GG	GG	TT	GG	TT	GG	TT	TT	GG	GG	GG	GG	GG	GG	GG	GG	GG	TT	GG	TT	TT	GG	GG	GG	GG	TT	GG	GG	TT
AX-94524226	2A	694754759	G/C	GG	CC	GG	GG	GG	GG	GG	CC	GG	GG	GG	GG	GG	GG	GG	GG	GG	GG	GG	CC	GG	CC	GG	CC	CC	GG	GG	GG	GG	GG	GG	GG	GG	GG	CC	GG	CC	CC	GG	GG	GG	GG	CC	GG	GG	CC
AX-94706684	2A	695350847	A/T	AA	AA	AA	AA	AA	AA	AA	AA	AA	AA	AA	AA	AA	AA	AA	AA	AA	AA	AA	TT	AA	TT	AA	TT	AA	AA	AA	AA	AA	AA	AA	AA	AA	AA	TT	AA	TT	AA	AA	AA	AA	AA	AA	AA	AA	AA
AX-94827966	2A	697302569	G/C	GG	CC	GG	CC	GG	CC	GG	CC	CC	CC	GG	GG	GG	GG	GG	GG	GG	GG	GG	CC	GG	CC	CC	CC	CC	GG	CC	NN	GG	GG	GG	GG	GG	GG	CC	GG	CC	CC	CC	GG	CC	GG	CC	GG	GG	CC
AX-94941826	2A	698283746	T/A	AA	TT	AA	AA	TT	AA	TT	TT	AA	AA	TT	TT	TT	AA	AA	TT	TT	TT	AA	TT	AA	TT	AA	TT	TT	AA	AA	AA	TT	AA	AA	AA	TT	TT	TT	TT	TT	TT	AA	AA	AA	TT	TT	TT	TT	TT
AX-94408768	2A	699422608	C/T	TT	CC	TT	TT	CC	TT	CC	CC	TT	TT	CC	CC	CC	TT	TT	CC	CC	CC	TT	CC	TT	CC	TT	CC	CC	TT	TT	TT	CC	TT	TT	TT	CC	CC	CC	CC	CC	TT	TT	TT	TT	CC	CC	CC	CC	CC
AX-94519889	2A	699513547	A/G	AA	AA	GG	GG	AA	AA	GG	AA	AA	AA	GG	AA	AA	AA	GG	GG	GG	AA	GG	GG	GG	AA	AA	GG	AA	GG	AA	AA	GG	GG	GG	AA	AA	GG	AA	AA	AA	AA	GG	AA	GG	GG	AA	AA	AA	AA
AX-94676956	2A	699514467	T/C	TT	TT	TT	TT	TT	TT	TT	TT	TT	TT	TT	CC	TT	TT	TT	TT	CC	CC	TT	CC	TT	CC	TT	CC	TT	TT	TT	TT	CC	TT	TT	TT	CC	TT	CC	CC	CC	TT	TT	TT	TT	TT	TT	CC	CC	TT
AX-95151522	2A	699851124	C/A	CC	AA	CC	CC	AA	CC	AA	AA	CC	CC	AA	CC	AA	CC	CC	AA	CC	CC	CC	CC	CC	CC	CC	CC	AA	CC	CC	CC	CC	CC	CC	CC	CC	AA	CC	CC	CC	CC	CC	CC	CC	AA	AA	CC	CC	AA
AX-95189751	2A	699912000	C/G	CC	GG	CC	CC	GG	CC	GG	GG	GG	CC	GG	CC	GG	CC	CC	GG	CC	CC	CC	CC	CC	CC	CC	CC	GG	CC	GG	CC	CC	CC	CC	CC	CC	GG	CC	CC	CC	GG	CC	CC	CC	GG	GG	CC	CC	GG
AX-94399675	2A	705804825	C/T	TT	CC	TT	CC	CC	CC	CC	CC	CC	CC	CC	CC	CC	CC	TT	CC	TT	CC	TT	TT	TT	TT	CC	TT	CC	TT	CC	TT	TT	TT	TT	TT	CC	CC	TT	CC	TT	TT	CC	TT	CC	CC	CC	CC	TT	CC
AX-95120131	2A	706919525	A/G	AA	GG	AA	AA	GG	GG	GG	GG	GG	AA	GG	GG	GG	AA	AA	GG	AA	GG	AA	AA	AA	AA	GG	AA	GG	AA	GG	AA	AA	AA	AA	AA	GG	GG	AA	AA	AA	AA	AA	AA	AA	GG	GG	GG	AA	GG
AX-95629290	2A	709041714	A/G	AA	GG	AA	AA	GG	GG	GG	GG	GG	AA	GG	GG	GG	AA	AA	GG	AA	GG	AA	AA	AA	AA	GG	AA	GG	AA	GG	AA	AA	AA	AA	AA	GG	GG	AA	AA	AA	GG	AA	AA	AA	GG	GG	GG	AA	GG
AX-95132948	2A	710194376	G/A	AA	GG	AA	GG	GG	GG	GG	GG	GG	GG	GG	GG	GG	GG	AA	GG	AA	GG	AA	GG	AA	GG	GG	GG	GG	AA	NN	AA	GG	AA	AA	AA	GG	GG	GG	AA	GG	AA	GG	AA	GG	GG	GG	GG	AA	GG
AX-95173053	2A	710357917	G/A	GG	AA	GG	GG	AA	GG	AA	AA	AA	GG	AA	GG	AA	GG	GG	AA	GG	GG	GG	GG	GG	GG	GG	GG	AA	GG	AA	GG	GG	GG	GG	GG	GG	AA	GG	GG	GG	AA	GG	GG	GG	AA	AA	GG	GG	AA
AX-94463736	2A	711039549	A/G	AA	AA	AA	GG	AA	GG	AA	AA	AA	GG	AA	GG	AA	GG	AA	AA	AA	GG	AA	GG	AA	GG	GG	GG	AA	NN	AA	AA	GG	AA	NN	AA	GG	AA	GG	AA	GG	GG	GG	AA	GG	AA	AA	GG	AA	AA
AX-94978347	2A	711884236	G/T	GG	TT	GG	GG	TT	GG	TT	GG	TT	GG	TT	GG	TT	GG	GG	GG	GG	GG	GG	GG	GG	GG	GG	GG	TT	GG	TT	GG	GG	GG	GG	GG	GG	TT	GG	GG	GG	GG	GG	GG	GG	TT	TT	GG	GG	TT
AX-94852911	2A	712573204	C/A	CC	CC	CC	AA	CC	AA	CC	CC	CC	AA	CC	AA	CC	AA	CC	CC	CC	AA	CC	AA	CC	AA	AA	AA	CC	CC	CC	CC	AA	CC	CC	CC	AA	CC	AA	CC	AA	CC	AA	CC	AA	CC	CC	AA	CC	CC
AX-95255906	2A	715336375	C/T	TT	CC	TT	TT	CC	CC	TT	CC	CC	CC	TT	CC	CC	CC	TT	TT	TT	CC	TT	TT	TT	CC	CC	TT	CC	TT	CC	TT	TT	TT	TT	CC	CC	TT	CC	CC	CC	CC	TT	CC	TT	TT	CC	CC	CC	CC
AX-94687724	2A	715336951	C/T	CC	CC	CC	CC	CC	TT	CC	TT	CC	CC	CC	TT	CC	CC	TT	TT	CC	TT	TT	CC	CC	CC	TT	CC	CC	TT	TT	CC	CC	TT	TT	TT	TT	CC	CC	CC	CC	CC	CC	TT	CC	CC	CC	TT	CC	CC
AX-94895021	2A	715814215	C/T	TT	TT	TT	CC	TT	CC	TT	CC	CC	CC	TT	CC	TT	CC	CC	CC	TT	CC	CC	CC	TT	CC	CC	CC	TT	CC	CC	NN	CC	CC	CC	CC	CC	TT	CC	TT	CC	CC	CC	CC	CC	TT	TT	CC	TT	TT
AX-94417710	2A	715928465	G/A	AA	AA	AA	GG	AA	GG	AA	GG	GG	GG	AA	GG	AA	GG	GG	GG	AA	GG	GG	GG	AA	GG	GG	GG	AA	GG	GG	AA	GG	GG	GG	GG	GG	AA	GG	AA	GG	GG	GG	GG	GG	AA	AA	GG	AA	AA
AX-94579959	2A	715946428	T/A	TT	TT	TT	AA	TT	TT	TT	TT	TT	AA	TT	TT	TT	AA	TT	TT	TT	TT	TT	AA	TT	AA	TT	AA	TT	TT	TT	TT	AA	TT	TT	TT	TT	TT	AA	TT	AA	TT	AA	TT	AA	TT	TT	TT	TT	TT
AX-94982819	2A	717817005	C/A	CC	CC	CC	AA	CC	CC	CC	CC	AA	AA	CC	CC	CC	AA	CC	CC	CC	CC	CC	CC	CC	CC	CC	CC	CC	CC	AA	CC	AA	CC	CC	CC	CC	CC	CC	CC	CC	CC	AA	CC	AA	CC	CC	CC	CC	CC
AX-94517432	2A	718351421	T/C	CC	CC	TT	TT	TT	TT	TT	CC	CC	CC	TT	CC	CC	TT	TT	CC	TT	CC	TT	TT	TT	TT	TT	TT	TT	TT	CC	TT	CC	TT	CC	TT	CC	TT	TT	TT	CC	TT	TT	TT	TT	TT	CC	TT	CC	TT
AX-95681996	2A	718571592	A/G	AA	AA	AA	GG	AA	AA	AA	AA	AA	GG	AA	AA	AA	GG	AA	AA	AA	AA	AA	AA	AA	AA	AA	AA	AA	AA	AA	AA	GG	AA	AA	AA	AA	AA	AA	AA	AA	GG	GG	AA	GG	AA	AA	AA	AA	AA
AX-94715488	2A	718723929	A/T	TT	TT	TT	AA	TT	AA	TT	AA	TT	AA	TT	AA	TT	AA	AA	AA	AA	AA	AA	AA	TT	AA	AA	AA	TT	AA	TT	TT	AA	AA	AA	TT	AA	TT	AA	AA	AA	AA	AA	TT	AA	TT	TT	AA	AA	TT
AX-94535413	2A	718885264	C/T	TT	TT	TT	TT	TT	CC	TT	CC	TT	TT	TT	CC	TT	TT	CC	CC	CC	CC	CC	CC	TT	CC	CC	CC	TT	CC	TT	TT	TT	CC	CC	TT	CC	TT	CC	CC	CC	TT	TT	TT	TT	TT	TT	CC	CC	TT
AX-94514221	2A	718918924	G/C	GG	GG	GG	CC	GG	GG	GG	GG	CC	CC	GG	GG	GG	CC	GG	GG	GG	GG	GG	GG	GG	GG	GG	GG	GG	GG	CC	GG	CC	GG	GG	GG	GG	GG	GG	GG	GG	CC	CC	GG	CC	GG	GG	GG	GG	GG
AX-95231859	2A	719360416	G/A	GG	GG	GG	GG	GG	GG	GG	AA	GG	GG	GG	GG	GG	GG	AA	GG	GG	GG	GG	GG	AA	GG	GG	GG	GG	GG	GG	GG	GG	GG	AA	GG	GG	GG	GG	GG	GG	AA	GG	GG	GG	GG	GG	GG	AA	GG
AX-94871509	2A	723823745	G/C	GG	GG	GG	GG	GG	GG	GG	CC	GG	GG	GG	NN	GG	GG	CC	CC	GG	CC	CC	GG	GG	GG	CC	GG	GG	CC	GG	GG	GG	CC	CC	GG	CC	GG	GG	GG	GG	GG	GG	GG	GG	GG	GG	CC	CC	GG
AX-94500620	2A	726436553	G/A	GG	GG	GG	GG	GG	AA	GG	AA	GG	GG	GG	AA	GG	GG	AA	AA	GG	AA	AA	GG	GG	GG	AA	GG	AA	AA	GG	GG	AA	AA	AA	GG	AA	GG	GG	GG	GG	GG	GG	GG	GG	GG	GG	AA	AA	GG
AX-94505180	2A	733091139	G/A	AA	GG	AA	GG	GG	GG	GG	GG	AA	GG	GG	GG	GG	GG	GG	GG	AA	GG	GG	GG	AA	GG	GG	GG	GG	GG	AA	AA	AA	GG	GG	GG	GG	GG	GG	GG	GG	AA	GG	GG	GG	GG	GG	GG	GG	GG
AX-94382147	2A	733530801	C/T	TT	CC	TT	TT	CC	CC	TT	CC	TT	CC	TT	CC	CC	CC	TT	TT	TT	CC	TT	TT	TT	CC	TT	TT	CC	TT	TT	TT	TT	TT	TT	CC	CC	TT	CC	CC	CC	CC	TT	CC	TT	TT	CC	CC	CC	CC
AX-95679309	2A	733922247	C/A	AA	CC	AA	CC	CC	CC	CC	CC	AA	CC	CC	CC	CC	CC	CC	CC	CC	CC	CC	CC	AA	CC	CC	CC	CC	CC	AA	AA	CC	CC	CC	CC	CC	CC	CC	CC	CC	AA	CC	CC	CC	CC	CC	CC	CC	CC
AX-94508212	2A	734347890	G/C	GG	CC	GG	GG	CC	GG	CC	GG	GG	CC	CC	CC	CC	CC	GG	CC	CC	CC	GG	CC	GG	GG	CC	GG	CC	GG	GG	GG	CC	CC	GG	CC	CC	CC	GG	GG	GG	GG	GG	CC	GG	CC	CC	CC	GG	GG
AX-94674675	2A	734521628	A/G	AA	GG	AA	AA	GG	AA	GG	AA	GG	GG	GG	GG	GG	AA	AA	GG	GG	GG	AA	GG	AA	AA	GG	AA	GG	AA	GG	AA	AA	AA	AA	GG	GG	GG	AA	AA	AA	GG	AA	GG	AA	GG	GG	GG	AA	AA
AX-94667492	2A	734545758	G/A	GG	AA	AA	GG	GG	GG	AA	GG	AA	GG	AA	GG	AA	GG	AA	AA	AA	GG	AA	GG	GG	AA	GG	GG	GG	GG	GG	AA	GG	AA	AA	GG	NN	GG	GG	AA	GG	GG	AA	AA	NN	AA	GG	GG	AA	GG
AX-94924770	2A	735564490	T/C	TT	CC	TT	TT	CC	TT	CC	TT	CC	CC	CC	TT	CC	TT	TT	CC	TT	TT	TT	TT	TT	TT	TT	TT	TT	TT	CC	TT	TT	TT	TT	CC	TT	CC	TT	TT	TT	CC	TT	CC	TT	CC	CC	TT	TT	TT
AX-95215439	2A	736455467	T/C	TT	CC	CC	CC	CC	CC	CC	TT	CC	NN	CC	TT	NN	TT	TT	CC	TT	CC	TT	TT	CC	TT	TT	CC	CC	TT	CC	CC	NN	CC	NN	CC	TT	TT	NN	CC	TT	TT	CC	CC	TT	CC	CC	TT	CC	CC
AX-94442602	2A	736744637	C/T	TT	CC	TT	CC	CC	CC	CC	CC	CC	CC	CC	CC	CC	CC	CC	CC	CC	CC	CC	CC	TT	CC	CC	CC	CC	CC	CC	TT	TT	CC	CC	CC	CC	CC	CC	CC	CC	CC	CC	CC	CC	CC	CC	CC	CC	CC
AX-94602066	2A	738985865	C/G	GG	CC	GG	CC	CC	CC	CC	CC	CC	CC	CC	CC	CC	CC	CC	CC	GG	GG	CC	GG	GG	CC	CC	CC	CC	CC	CC	GG	CC	CC	CC	CC	CC	CC	CC	CC	CC	CC	CC	CC	CC	CC	CC	CC	CC	GG
AX-94644661	2A	739481271	A/C	CC	CC	CC	AA	CC	AA	AA	AA	AA	AA	CC	AA	CC	AA	AA	AA	AA	AA	AA	AA	CC	AA	AA	AA	AA	AA	NN	CC	AA	AA	AA	AA	AA	AA	AA	AA	AA	AA	AA	AA	AA	NN	NN	AA	AA	AA
AX-94673428	2A	739821312	T/C	NN	TT	TT	CC	TT	TT	CC	TT	TT	TT	CC	TT	TT	TT	CC	CC	CC	TT	CC	CC	NN	TT	CC	CC	TT	CC	TT	NN	CC	CC	CC	TT	TT	CC	TT	TT	TT	TT	CC	TT	CC	CC	TT	TT	TT	TT
AX-94893321	2A	740069839	G/A	AA	AA	AA	GG	AA	GG	AA	GG	GG	GG	AA	GG	AA	GG	GG	AA	GG	GG	GG	GG	AA	GG	GG	GG	GG	GG	GG	GG	GG	GG	AA	GG	GG	AA	GG	GG	GG	GG	GG	GG	GG	AA	AA	GG	GG	GG
AX-94910420	2A	740070835	T/C	CC	CC	CC	TT	CC	TT	CC	TT	TT	TT	CC	TT	CC	TT	TT	CC	TT	TT	TT	TT	CC	TT	TT	TT	TT	TT	TT	CC	TT	TT	CC	TT	TT	CC	TT	TT	TT	TT	TT	TT	TT	CC	CC	TT	TT	TT
AX-94963427	2A	742134116	A/G	GG	AA	GG	AA	AA	AA	AA	AA	GG	AA	AA	AA	AA	AA	AA	AA	AA	AA	AA	AA	GG	AA	AA	AA	AA	AA	GG	GG	AA	AA	GG	AA	AA	AA	AA	AA	AA	AA	AA	AA	AA	AA	AA	AA	AA	AA
AX-94916909	2A	744328933	C/T	CC	CC	TT	TT	TT	CC	TT	CC	TT	CC	TT	CC	CC	CC	CC	CC	CC	CC	TT	CC	TT	CC	CC	TT	TT	CC	TT	TT	CC	CC	CC	TT	CC	TT	CC	TT	CC	CC	TT	CC	TT	TT	CC	CC	CC	TT
AX-94620950	2A	745092831	C/T	TT	CC	TT	CC	CC	CC	CC	CC	CC	CC	CC	CC	CC	CC	CC	CC	CC	TT	CC	TT	TT	CC	CC	CC	CC	CC	CC	TT	CC	CC	CC	CC	CC	CC	CC	CC	CC	CC	CC	CC	CC	CC	CC	CC	CC	CC
AX-94485041	2A	746755563	G/A	NN	NN	AA	GG	AA	GG	AA	GG	GG	GG	AA	GG	AA	GG	GG	AA	GG	GG	GG	GG	AA	GG	GG	GG	GG	GG	GG	AA	GG	GG	GG	GG	GG	AA	GG	GG	GG	GG	GG	GG	GG	AA	AA	GG	GG	GG
AX-94835328	2A	746858392	G/A	AA	GG	NN	GG	AA	GG	AA	GG	GG	GG	GG	GG	GG	GG	AA	NN	GG	AA	AA	GG	AA	GG	GG	GG	GG	AA	GG	GG	GG	AA	AA	AA	GG	AA	GG	GG	GG	GG	AA	AA	GG	AA	GG	GG	AA	AA
AX-95630181	2A	747090420	A/G	GG	AA	GG	GG	GG	GG	GG	GG	GG	AA	GG	AA	GG	GG	GG	AA	AA	GG	GG	GG	GG	AA	AA	AA	AA	AA	GG	GG	AA	GG	AA	GG	AA	GG	AA	AA	AA	AA	GG	AA	GG	GG	AA	AA	AA	GG
AX-95194681	2A	747090526	C/T	TT	CC	TT	CC	TT	TT	TT	TT	CC	CC	TT	CC	TT	TT	TT	CC	CC	CC	TT	CC	TT	CC	CC	CC	CC	CC	TT	TT	CC	TT	CC	TT	CC	TT	CC	CC	CC	CC	CC	CC	CC	TT	CC	CC	CC	TT
AX-94775879	2A	747144105	A/G	GG	AA	GG	GG	GG	GG	GG	GG	AA	AA	GG	AA	GG	GG	GG	AA	AA	AA	GG	AA	GG	AA	AA	AA	AA	AA	AA	GG	AA	GG	AA	GG	AA	GG	AA	AA	AA	AA	GG	AA	GG	GG	AA	AA	AA	GG
AX-94422071	2A	748558272	G/T	GG	GG	GG	GG	GG	GG	GG	GG	TT	GG	GG	GG	GG	GG	GG	GG	GG	TT	GG	TT	GG	GG	GG	GG	GG	GG	TT	GG	GG	GG	GG	GG	GG	GG	GG	GG	GG	GG	GG	GG	GG	GG	GG	GG	GG	GG
AX-94520918	2A	748818072	C/T	TT	NN	TT	CC	CC	CC	CC	CC	CC	TT	CC	CC	CC	CC	CC	NN	CC	CC	CC	CC	TT	CC	CC	CC	CC	CC	CC	TT	CC	CC	TT	CC	CC	CC	CC	CC	CC	CC	CC	CC	CC	CC	NN	CC	CC	CC
AX-95019215	2A	749090034	G/A	AA	AA	AA	GG	GG	GG	GG	GG	GG	GG	GG	GG	GG	GG	GG	AA	GG	GG	GG	GG	AA	GG	GG	GG	GG	GG	GG	AA	GG	GG	GG	GG	GG	GG	GG	GG	GG	GG	GG	GG	GG	GG	AA	GG	GG	GG
AX-94611746	2A	749958858	T/C	TT	TT	TT	CC	CC	CC	CC	CC	CC	CC	CC	TT	CC	CC	CC	TT	TT	CC	CC	CC	TT	TT	TT	TT	TT	TT	CC	TT	TT	CC	TT	CC	TT	NN	TT	TT	TT	TT	CC	TT	CC	CC	TT	TT	TT	CC
AX-94396543	2A	751269985	C/T	CC	CC	CC	CC	CC	CC	CC	CC	CC	CC	CC	TT	CC	CC	CC	CC	TT	CC	CC	CC	CC	TT	TT	TT	TT	TT	CC	TT	TT	CC	TT	CC	TT	CC	TT	TT	TT	TT	CC	TT	CC	CC	CC	TT	TT	CC
AX-95131491	2A	751420172	G/T	TT	GG	TT	TT	TT	TT	TT	TT	TT	TT	TT	GG	TT	TT	TT	GG	GG	TT	TT	TT	TT	GG	GG	GG	GG	GG	TT	TT	GG	TT	GG	TT	GG	TT	GG	GG	GG	GG	TT	GG	TT	TT	GG	GG	GG	TT
AX-94465394	2A	751609393	C/T	CC	TT	CC	CC	CC	CC	CC	CC	CC	CC	CC	CC	CC	CC	CC	TT	CC	CC	CC	CC	CC	CC	CC	CC	CC	CC	CC	CC	CC	CC	CC	CC	CC	CC	CC	CC	CC	CC	CC	CC	CC	CC	TT	CC	CC	CC
AX-94538070	2A	752031903	A/G	GG	AA	AA	GG	GG	GG	GG	GG	AA	GG	GG	AA	GG	GG	GG	AA	AA	AA	GG	AA	AA	AA	AA	AA	AA	AA	AA	AA	AA	GG	AA	GG	AA	GG	AA	AA	AA	AA	GG	AA	GG	GG	AA	AA	AA	GG
AX-95179457	2A	752102994	T/C	TT	TT	TT	TT	TT	TT	TT	TT	TT	TT	TT	CC	TT	TT	TT	TT	CC	TT	TT	CC	TT	CC	CC	CC	CC	CC	TT	TT	CC	TT	CC	TT	CC	TT	CC	CC	CC	CC	TT	CC	TT	TT	TT	CC	CC	TT
AX-94912259	2A	752276380	G/A	GG	GG	AA	GG	GG	GG	GG	GG	AA	GG	GG	GG	GG	GG	GG	GG	GG	AA	GG	GG	AA	GG	GG	GG	GG	GG	AA	AA	GG	GG	GG	GG	GG	GG	GG	GG	GG	GG	GG	GG	GG	GG	GG	GG	GG	GG
AX-94810461	2A	752277361	C/T	CC	TT	CC	CC	CC	CC	CC	CC	CC	CC	CC	CC	CC	CC	CC	TT	CC	CC	CC	CC	CC	CC	CC	CC	CC	CC	CC	CC	CC	CC	CC	CC	CC	CC	CC	CC	CC	CC	CC	CC	CC	CC	TT	CC	CC	CC
AX-94389587	2A	752796839	G/A	GG	AA	GG	GG	GG	GG	GG	GG	GG	GG	GG	AA	GG	GG	GG	AA	AA	GG	GG	AA	GG	AA	GG	AA	AA	AA	GG	GG	GG	GG	AA	GG	AA	GG	AA	AA	GG	AA	GG	AA	GG	GG	AA	AA	AA	GG
AX-94413023	2A	752796959	C/T	TT	CC	TT	TT	TT	TT	TT	TT	CC	TT	TT	CC	TT	TT	TT	CC	CC	CC	TT	CC	TT	CC	CC	CC	CC	CC	CC	TT	CC	TT	CC	TT	CC	TT	CC	CC	CC	CC	TT	CC	TT	TT	CC	CC	CC	TT
AX-94495566	2A	753252207	C/T	CC	CC	CC	CC	CC	CC	CC	CC	CC	CC	CC	CC	TT	CC	CC	TT	CC	CC	CC	CC	CC	CC	CC	TT	CC	TT	CC	CC	CC	CC	CC	TT	CC	CC	TT	TT	CC	CC	CC	TT	CC	CC	CC	TT	CC	CC
AX-94542148	2A	754461436	A/G	GG	AA	AA	GG	GG	GG	GG	GG	AA	GG	GG	AA	GG	GG	GG	AA	AA	AA	GG	AA	AA	NN	AA	AA	AA	AA	AA	AA	AA	GG	GG	GG	AA	AA	AA	AA	AA	AA	GG	AA	GG	GG	AA	AA	AA	AA
AX-94394918	2A	755337231	A/G	AA	AA	GG	AA	AA	AA	AA	AA	AA	AA	AA	AA	AA	AA	AA	AA	AA	AA	AA	GG	GG	GG	AA	GG	GG	GG	AA	GG	AA	AA	AA	AA	AA	GG	GG	AA	GG	GG	AA	GG	AA	AA	AA	GG	AA	GG
AX-94813805	2A	755788726	A/G	AA	AA	AA	AA	AA	AA	AA	AA	AA	AA	AA	GG	AA	AA	AA	AA	GG	AA	AA	GG	AA	GG	GG	AA	AA	NN	AA	NN	GG	AA	AA	AA	GG	GG	GG	GG	GG	GG	AA	GG	AA	AA	AA	GG	GG	GG
AX-94731563	2A	755794765	G/A	GG	GG	AA	GG	GG	GG	GG	GG	GG	GG	GG	AA	GG	GG	GG	GG	GG	GG	GG	AA	AA	AA	AA	AA	GG	AA	GG	AA	AA	GG	GG	GG	AA	AA	AA	GG	AA	AA	GG	AA	GG	GG	GG	AA	GG	AA
AX-95210834	2A	757333840	A/G	GG	AA	AA	GG	GG	GG	GG	GG	GG	GG	GG	AA	GG	AA	GG	AA	GG	AA	GG	AA	AA	AA	AA	AA	AA	AA	GG	AA	GG	GG	GG	GG	AA	AA	AA	GG	AA	AA	GG	AA	GG	GG	AA	AA	GG	AA
AX-94667745	2A	757946577	T/C	TT	CC	CC	TT	TT	TT	TT	TT	TT	TT	TT	TT	TT	CC	TT	CC	TT	CC	TT	TT	CC	TT	CC	CC	CC	TT	TT	CC	TT	TT	TT	TT	TT	CC	TT	TT	TT	TT	TT	TT	TT	TT	CC	TT	TT	CC
AX-94802107	2A	757948203	T/C	TT	CC	CC	TT	TT	TT	TT	TT	TT	TT	TT	CC	TT	CC	TT	CC	TT	CC	TT	TT	CC	TT	CC	CC	CC	TT	TT	CC	TT	TT	TT	TT	CC	CC	TT	TT	TT	TT	TT	TT	TT	TT	CC	TT	TT	CC
AX-94942225	2A	758391129	T/C	TT	TT	TT	TT	TT	TT	TT	TT	CC	TT	TT	CC	TT	CC	TT	TT	CC	CC	TT	CC	TT	CC	CC	CC	CC	CC	CC	TT	CC	TT	TT	TT	TT	CC	CC	CC	CC	CC	TT	CC	TT	TT	TT	CC	CC	CC
AX-94472538	2A	758692104	T/G	NN	TT	TT	TT	TT	TT	TT	TT	GG	TT	TT	TT	TT	TT	TT	TT	TT	TT	TT	GG	TT	GG	GG	GG	TT	TT	GG	TT	GG	TT	TT	TT	TT	TT	GG	TT	GG	GG	TT	GG	TT	TT	TT	GG	TT	TT
AX-95146247	2A	759456590	C/T	CC	TT	CC	CC	CC	CC	CC	CC	TT	CC	CC	TT	CC	TT	CC	TT	TT	TT	CC	TT	CC	TT	TT	TT	TT	CC	TT	CC	TT	CC	CC	CC	CC	TT	TT	TT	TT	TT	CC	TT	CC	CC	TT	TT	CC	TT
AX-94473636	2A	759456857	G/A	GG	AA	GG	AA	GG	GG	GG	GG	AA	AA	AA	GG	GG	GG	GG	AA	AA	GG	GG	AA	AA	AA	GG	AA	AA	AA	AA	GG	GG	GG	GG	GG	GG	GG	AA	AA	AA	GG	AA	GG	AA	GG	GG	GG	GG	GG
AX-95080933	2A	759465359	G/C	GG	CC	GG	GG	GG	GG	GG	GG	CC	GG	GG	CC	GG	GG	GG	CC	GG	CC	GG	CC	GG	CC	GG	CC	CC	GG	CC	GG	CC	GG	GG	GG	GG	GG	CC	GG	CC	CC	GG	CC	GG	GG	CC	CC	GG	GG
AX-94607578	2A	759732403	C/G	GG	GG	CC	GG	GG	GG	GG	GG	CC	GG	GG	CC	GG	CC	GG	GG	CC	CC	GG	CC	CC	CC	CC	CC	CC	GG	NN	CC	CC	GG	GG	GG	GG	CC	CC	CC	CC	CC	GG	CC	GG	GG	GG	CC	CC	CC
AX-95165612	2A	759812586	G/C	GG	GG	GG	GG	GG	GG	GG	GG	GG	GG	GG	GG	GG	CC	GG	CC	GG	GG	GG	GG	GG	GG	CC	CC	GG	CC	GG	GG	GG	GG	GG	CC	GG	CC	CC	CC	GG	GG	GG	CC	GG	GG	GG	CC	GG	CC
AX-94887137	2A	759821783	C/A	AA	CC	CC	AA	AA	AA	AA	AA	CC	AA	AA	CC	AA	CC	AA	CC	CC	CC	AA	CC	CC	CC	CC	CC	CC	AA	CC	CC	CC	AA	AA	AA	AA	CC	CC	CC	CC	CC	AA	CC	AA	AA	CC	CC	CC	CC
AX-95208724	2A	759830567	T/C	TT	CC	CC	TT	TT	TT	TT	TT	CC	TT	TT	CC	TT	TT	TT	CC	CC	CC	TT	CC	CC	CC	TT	CC	CC	TT	CC	CC	CC	TT	TT	TT	TT	TT	CC	CC	CC	CC	TT	CC	TT	TT	CC	CC	CC	TT
AX-95192643	2A	760582659	C/T	CC	CC	TT	CC	CC	CC	CC	CC	CC	CC	CC	TT	CC	CC	CC	CC	CC	TT	CC	CC	TT	CC	CC	CC	TT	CC	CC	TT	CC	CC	CC	CC	CC	CC	CC	CC	CC	CC	CC	CC	CC	CC	CC	CC	CC	CC
AX-94884567	2A	760619458	A/G	AA	AA	GG	AA	AA	AA	AA	AA	GG	AA	AA	GG	AA	AA	AA	AA	GG	GG	AA	GG	GG	GG	AA	GG	GG	AA	GG	GG	GG	AA	AA	AA	AA	AA	GG	GG	GG	GG	AA	GG	AA	AA	AA	GG	GG	AA
AX-94464499	2A	761247658	C/G	CC	CC	GG	CC	CC	GG	GG	CC	CC	CC	CC	CC	CC	CC	CC	GG	CC	CC	CC	GG	CC	CC	CC	GG	CC	GG	CC	CC	CC	GG	CC	GG	GG	CC	GG	GG	GG	GG	CC	CC	CC	GG	CC	GG	CC	CC
AX-94390395	2A	761305579	C/T	CC	TT	CC	CC	TT	CC	CC	CC	TT	CC	TT	CC	CC	CC	CC	TT	CC	CC	CC	TT	CC	TT	TT	TT	TT	TT	TT	CC	TT	TT	CC	TT	CC	CC	TT	CC	TT	TT	CC	TT	CC	TT	TT	CC	CC	CC
AX-94463530	2A	761541119	C/G	CC	GG	GG	GG	CC	CC	CC	CC	GG	CC	CC	CC	CC	CC	CC	GG	CC	CC	CC	GG	GG	CC	CC	GG	GG	GG	GG	GG	CC	GG	CC	CC	CC	CC	GG	CC	GG	GG	GG	CC	CC	GG	GG	CC	GG	CC
AX-94791436	2A	761541210	C/G	CC	CC	CC	CC	CC	GG	CC	CC	CC	CC	CC	GG	CC	CC	CC	CC	GG	GG	CC	CC	CC	CC	CC	CC	CC	CC	CC	CC	CC	CC	CC	CC	GG	GG	CC	GG	CC	CC	CC	CC	GG	CC	CC	GG	CC	GG
AX-94956717	2A	762091140	T/C	TT	TT	CC	CC	TT	CC	TT	TT	TT	TT	TT	CC	TT	TT	TT	TT	CC	CC	TT	TT	CC	TT	TT	TT	TT	TT	TT	CC	TT	TT	TT	TT	CC	CC	TT	CC	TT	TT	CC	TT	CC	TT	TT	CC	CC	CC
AX-95204604	2A	762161916	A/G	NN	AA	GG	GG	AA	GG	GG	AA	AA	AA	AA	GG	NN	AA	AA	AA	GG	GG	NN	AA	GG	AA	AA	AA	AA	AA	AA	GG	GG	AA	AA	AA	GG	GG	AA	GG	AA	AA	GG	AA	GG	AA	AA	GG	GG	GG
AX-94884111	2A	762234235	G/A	GG	AA	GG	GG	GG	GG	GG	GG	AA	GG	GG	GG	GG	GG	GG	AA	GG	GG	GG	GG	GG	GG	AA	AA	GG	AA	AA	GG	GG	GG	GG	GG	GG	GG	AA	GG	AA	AA	GG	AA	GG	GG	AA	GG	GG	GG
AX-94965989	2A	762318181	T/C	CC	CC	TT	TT	CC	TT	TT	CC	CC	CC	TT	TT	CC	CC	CC	TT	TT	TT	CC	CC	TT	CC	CC	TT	CC	TT	CC	TT	CC	TT	CC	TT	TT	TT	TT	TT	TT	CC	TT	TT	TT	TT	CC	TT	TT	TT
AX-94857027	2A	762591738	C/G	CC	CC	GG	GG	CC	GG	GG	CC	CC	CC	GG	GG	CC	CC	CC	CC	GG	GG	CC	CC	GG	CC	CC	CC	CC	CC	CC	GG	CC	GG	CC	CC	GG	GG	CC	GG	CC	CC	GG	CC	GG	GG	CC	GG	GG	GG
AX-94391163	2A	762762668	A/G	GG	GG	GG	AA	AA	AA	NN	GG	AA	GG	NN	AA	GG	GG	GG	AA	AA	AA	GG	AA	AA	AA	AA	AA	AA	AA	AA	NN	GG	GG	GG	AA	AA	AA	AA	AA	AA	AA	AA	AA	AA	NN	GG	AA	AA	AA
AX-94986827	2A	762901143	C/T	CC	CC	CC	CC	TT	CC	CC	CC	TT	CC	TT	CC	CC	CC	CC	TT	CC	TT	CC	TT	CC	TT	TT	TT	TT	TT	TT	CC	CC	TT	CC	TT	CC	CC	TT	TT	TT	TT	TT	TT	CC	TT	CC	TT	TT	TT
AX-95021486	2A	762986452	C/G	CC	GG	GG	GG	CC	CC	GG	GG	GG	GG	CC	CC	CC	GG	CC	GG	CC	CC	CC	GG	GG	CC	CC	GG	GG	GG	GG	GG	NN	GG	GG	CC	CC	CC	GG	CC	GG	GG	GG	CC	CC	GG	GG	CC	GG	CC
AX-94432660	2A	762986550	G/C	GG	GG	GG	GG	GG	GG	GG	CC	GG	CC	GG	GG	GG	CC	GG	GG	GG	GG	GG	GG	GG	GG	GG	GG	GG	GG	GG	GG	GG	GG	CC	GG	GG	GG	GG	GG	GG	GG	GG	GG	GG	GG	GG	GG	GG	GG
AX-95092707	2A	762987438	C/A	NN	CC	AA	AA	AA	CC	AA	AA	CC	AA	AA	CC	CC	AA	CC	AA	CC	CC	CC	CC	AA	CC	AA	AA	AA	AA	CC	AA	CC	AA	AA	CC	CC	CC	AA	CC	AA	AA	AA	AA	CC	AA	CC	CC	AA	CC
AX-94563719	2A	762987470	C/T	NN	TT	TT	TT	CC	CC	TT	TT	TT	TT	CC	CC	NN	TT	NN	TT	CC	CC	TT	TT	TT	CC	CC	TT	TT	TT	TT	TT	NN	TT	TT	CC	CC	CC	TT	CC	TT	TT	TT	CC	CC	TT	TT	CC	TT	CC
AX-94826225	2A	763047848	T/C	CC	TT	CC	CC	CC	TT	CC	CC	TT	CC	CC	TT	CC	CC	CC	CC	TT	TT	CC	TT	CC	TT	CC	CC	CC	CC	TT	CC	CC	CC	CC	TT	TT	TT	CC	TT	CC	CC	TT	CC	TT	CC	TT	TT	TT	TT
AX-94472501	2A	763321305	C/T	TT	CC	CC	CC	TT	CC	CC	CC	CC	CC	TT	CC	TT	CC	TT	CC	CC	CC	TT	CC	CC	TT	TT	CC	CC	CC	CC	CC	CC	CC	CC	TT	CC	CC	CC	CC	CC	CC	CC	TT	CC	CC	CC	CC	CC	CC
AX-94633858	2A	763321742	G/C	GG	GG	CC	CC	GG	GG	GG	GG	GG	GG	GG	GG	GG	GG	GG	GG	GG	GG	GG	GG	CC	GG	GG	GG	GG	GG	GG	CC	GG	GG	GG	GG	GG	GG	GG	GG	GG	GG	CC	GG	GG	GG	GG	GG	CC	GG
AX-94910470	2A	763695237	C/G	CC	CC	GG	GG	CC	GG	CC	CC	CC	CC	CC	GG	CC	CC	CC	CC	GG	GG	CC	CC	GG	CC	CC	CC	CC	CC	CC	GG	GG	CC	CC	CC	GG	GG	CC	GG	CC	CC	GG	CC	GG	CC	CC	GG	GG	GG
AX-94749063	2A	763695475	A/G	AA	AA	AA	AA	AA	GG	AA	AA	AA	AA	AA	GG	AA	AA	AA	AA	GG	GG	AA	AA	AA	AA	AA	AA	AA	AA	AA	AA	GG	AA	AA	AA	GG	GG	AA	GG	AA	AA	AA	AA	GG	AA	AA	GG	AA	GG
AX-94657523	2A	764089887	T/A	TT	TT	TT	NN	AA	AA	TT	TT	TT	TT	AA	AA	TT	TT	TT	TT	AA	AA	TT	TT	TT	AA	AA	TT	TT	TT	TT	TT	AA	NN	TT	AA	AA	AA	TT	AA	TT	TT	NN	AA	AA	TT	TT	AA	TT	AA
AX-94502897	2A	764658670	T/C	TT	TT	CC	CC	TT	TT	TT	TT	TT	TT	TT	CC	TT	TT	TT	TT	CC	CC	TT	TT	CC	TT	TT	TT	TT	TT	TT	CC	CC	TT	TT	TT	TT	CC	TT	CC	TT	TT	CC	TT	CC	TT	TT	CC	CC	CC
AX-94675476	2A	764667132	A/G	AA	GG	GG	AA	AA	GG	GG	AA	GG	AA	GG	AA	GG	AA	AA	GG	AA	AA	AA	AA	AA	AA	AA	GG	AA	GG	GG	AA	AA	GG	AA	GG	GG	AA	GG	GG	GG	GG	GG	GG	AA	GG	GG	GG	AA	AA
AX-94685012	2A	764679145	A/G	AA	AA	GG	GG	AA	GG	AA	AA	AA	AA	AA	GG	AA	AA	AA	AA	GG	AA	AA	AA	GG	AA	AA	AA	AA	AA	AA	GG	AA	AA	AA	AA	GG	GG	AA	GG	AA	AA	NN	AA	GG	AA	AA	GG	GG	GG
AX-94694138	2A	764723865	G/C	GG	CC	CC	CC	GG	GG	NN	CC	CC	CC	NN	GG	GG	CC	GG	CC	GG	GG	GG	CC	CC	GG	GG	CC	CC	CC	CC	CC	GG	CC	CC	GG	GG	GG	CC	GG	CC	CC	CC	GG	GG	NN	CC	GG	CC	GG
AX-95135556	2A	764821166	T/C	TT	TT	CC	CC	TT	CC	TT	TT	TT	TT	TT	CC	TT	TT	TT	TT	CC	CC	TT	TT	CC	TT	TT	TT	TT	TT	TT	CC	CC	TT	TT	TT	CC	CC	TT	CC	TT	NN	CC	TT	CC	TT	TT	CC	CC	CC
AX-94523390	2A	766393836	A/G	GG	AA	AA	AA	AA	AA	GG	GG	GG	GG	AA	AA	GG	GG	GG	AA	AA	AA	GG	AA	AA	AA	GG	AA	GG	AA	GG	NN	AA	AA	GG	AA	AA	AA	AA	AA	AA	GG	AA	AA	AA	AA	AA	AA	AA	AA
AX-95217784	2A	766466657	G/A	AA	GG	GG	GG	GG	GG	AA	AA	AA	AA	GG	GG	AA	GG	AA	GG	GG	GG	AA	GG	GG	GG	AA	GG	AA	GG	AA	GG	GG	GG	AA	GG	GG	AA	GG	GG	GG	AA	GG	GG	GG	GG	GG	GG	GG	AA
AX-95113306	2A	767007363	A/T	AA	TT	AA	AA	TT	AA	AA	AA	AA	AA	TT	AA	AA	AA	AA	TT	AA	AA	AA	TT	AA	TT	AA	TT	AA	TT	NN	AA	TT	TT	AA	TT	AA	AA	TT	AA	TT	AA	AA	TT	AA	TT	TT	AA	AA	AA
AX-94901370	2A	767132246	C/T	CC	TT	CC	CC	TT	CC	CC	CC	CC	CC	TT	CC	CC	CC	CC	TT	CC	CC	CC	NN	CC	TT	CC	TT	CC	TT	NN	CC	CC	TT	CC	TT	CC	CC	TT	CC	TT	CC	CC	TT	CC	TT	TT	CC	CC	CC
AX-94404280	2A	767938508	C/T	CC	TT	CC	CC	CC	CC	CC	TT	CC	CC	CC	CC	TT	CC	CC	CC	CC	CC	CC	CC	CC	CC	CC	CC	CC	CC	CC	CC	CC	CC	CC	CC	CC	CC	CC	CC	TT	CC	CC	CC	CC	CC	TT	CC	CC	CC
AX-95187541	2A	769223567	T/C	CC	TT	TT	TT	TT	TT	CC	CC	TT	CC	TT	TT	CC	TT	CC	TT	TT	TT	CC	TT	TT	TT	TT	TT	TT	TT	TT	TT	CC	TT	CC	TT	TT	TT	TT	TT	TT	TT	TT	TT	TT	TT	TT	TT	TT	TT
AX-94422275	2A	769496865	T/C	TT	TT	CC	TT	TT	CC	NN	TT	CC	TT	CC	TT	CC	TT	TT	CC	TT	CC	TT	CC	TT	TT	TT	CC	TT	CC	CC	TT	TT	CC	TT	CC	TT	TT	CC	CC	CC	TT	TT	CC	TT	CC	TT	CC	TT	TT
AX-94442664	2A	769496903	T/C	CC	TT	TT	TT	TT	TT	CC	CC	TT	CC	TT	TT	CC	TT	CC	TT	TT	TT	CC	TT	TT	TT	TT	TT	TT	TT	TT	TT	CC	TT	CC	TT	TT	TT	TT	TT	TT	TT	TT	TT	TT	TT	TT	TT	TT	TT
AX-95182913	2A	770012792	A/G	GG	AA	AA	AA	GG	AA	GG	GG	AA	GG	GG	AA	GG	GG	GG	GG	AA	AA	GG	AA	AA	GG	AA	GG	AA	GG	AA	AA	GG	GG	GG	GG	AA	GG	GG	AA	GG	AA	AA	GG	AA	GG	AA	GG	AA	GG
AX-95216201	2A	770104698	C/T	CC	TT	TT	TT	CC	TT	CC	CC	CC	CC	CC	TT	CC	CC	CC	CC	TT	TT	CC	TT	TT	CC	CC	CC	CC	CC	CC	TT	TT	CC	CC	CC	TT	CC	CC	TT	CC	CC	TT	CC	TT	CC	TT	CC	TT	CC
AX-95174315	2A	770412237	T/G	TT	TT	TT	TT	GG	TT	TT	TT	GG	TT	GG	TT	TT	GG	TT	GG	TT	TT	TT	TT	TT	GG	GG	GG	GG	GG	GG	NN	GG	GG	TT	GG	TT	GG	GG	TT	GG	GG	TT	GG	TT	GG	TT	GG	TT	GG
AX-94590094	2A	771460069	A/G	AA	GG	GG	GG	AA	GG	AA	AA	AA	AA	AA	GG	AA	AA	AA	AA	GG	GG	AA	GG	GG	AA	AA	AA	AA	AA	AA	AA	AA	AA	AA	AA	GG	AA	AA	GG	AA	AA	GG	AA	GG	AA	GG	AA	GG	AA
AX-94698653	2A	771506636	C/T	CC	CC	CC	CC	TT	CC	CC	CC	TT	CC	TT	CC	CC	TT	CC	TT	CC	CC	CC	CC	CC	TT	TT	TT	TT	TT	TT	CC	CC	TT	CC	TT	CC	TT	TT	CC	TT	TT	CC	TT	CC	TT	CC	TT	CC	TT
AX-95015689	2A	771772694	G/A	GG	GG	AA	AA	GG	AA	GG	GG	GG	GG	GG	AA	GG	GG	GG	GG	AA	AA	GG	AA	AA	GG	GG	GG	GG	GG	GG	AA	GG	GG	GG	GG	AA	GG	GG	AA	GG	GG	AA	GG	AA	GG	GG	GG	AA	GG
AX-94602542	2A	774814782	G/A	GG	GG	GG	GG	AA	GG	GG	GG	AA	GG	AA	GG	GG	AA	GG	GG	GG	GG	GG	GG	GG	GG	AA	GG	AA	GG	AA	GG	AA	AA	GG	GG	GG	AA	GG	GG	GG	AA	GG	GG	GG	AA	GG	GG	GG	AA
AX-94641374	2A	775165355	C/T	TT	CC	CC	CC	CC	TT	TT	TT	CC	TT	CC	CC	TT	CC	CC	CC	CC	CC	TT	CC	CC	CC	CC	CC	CC	CC	CC	CC	CC	CC	TT	CC	TT	CC	CC	CC	CC	CC	CC	CC	TT	CC	CC	CC	CC	CC
AX-95631542	2A	775523929	A/G	AA	GG	GG	GG	AA	AA	AA	AA	AA	AA	AA	GG	AA	AA	AA	AA	GG	GG	AA	AA	GG	AA	AA	AA	AA	AA	AA	GG	AA	AA	AA	AA	AA	AA	AA	GG	AA	AA	GG	AA	AA	AA	GG	AA	GG	AA
AX-94820368	2A	775981160	T/C	TT	TT	TT	TT	TT	TT	TT	TT	TT	TT	TT	TT	TT	TT	TT	CC	CC	TT	TT	CC	TT	CC	TT	CC	TT	CC	TT	TT	CC	TT	TT	CC	TT	TT	CC	CC	CC	TT	TT	CC	TT	TT	TT	CC	TT	TT
AX-94602991	2A	776022456	C/G	CC	GG	CC	CC	CC	CC	CC	CC	CC	CC	CC	CC	CC	CC	CC	CC	CC	CC	CC	CC	CC	CC	GG	CC	GG	CC	CC	NN	CC	CC	CC	CC	CC	CC	CC	CC	CC	CC	CC	CC	CC	CC	GG	CC	CC	CC
AX-94383052	2A	778020688	C/T	CC	TT	TT	CC	CC	CC	CC	CC	CC	CC	CC	TT	CC	TT	CC	TT	CC	CC	CC	CC	TT	CC	TT	CC	CC	CC	CC	TT	CC	CC	CC	CC	CC	TT	CC	CC	CC	CC	CC	CC	CC	CC	TT	CC	TT	TT
AX-94923870	2A	778722884	C/T	CC	TT	TT	CC	CC	CC	CC	CC	CC	CC	CC	TT	CC	TT	CC	TT	TT	CC	CC	CC	TT	CC	TT	CC	TT	CC	CC	TT	CC	CC	CC	CC	CC	TT	CC	TT	CC	CC	CC	CC	CC	CC	TT	CC	TT	TT
AX-94571080	2A	779186675	G/C	GG	GG	GG	GG	GG	GG	GG	GG	GG	GG	GG	GG	GG	CC	GG	GG	CC	GG	GG	GG	GG	GG	CC	GG	CC	GG	GG	GG	GG	GG	GG	GG	GG	CC	GG	CC	GG	GG	GG	GG	GG	GG	GG	GG	GG	CC
AX-95131610	2A	779645259	A/G	GG	AA	GG	GG	GG	AA	GG	AA	AA	AA	AA	GG	AA	AA	AA	AA	AA	GG	AA	GG	GG	GG	NN	AA	AA	AA	AA	GG	AA	GG	GG	AA	GG	AA	AA	AA	AA	GG	AA	AA	GG	GG	AA	AA	GG	AA
AX-95079497	2A	779976950	C/A	CC	CC	AA	CC	CC	CC	AA	CC	AA	CC	AA	CC	CC	AA	CC	CC	AA	CC	CC	CC	CC	CC	AA	CC	CC	CC	AA	CC	AA	AA	CC	CC	CC	AA	CC	AA	CC	CC	CC	CC	CC	AA	CC	CC	CC	AA
AX-94642093	2B	1832673	C/T	TT	TT	TT	CC	TT	CC	TT	CC	TT	CC	TT	CC	TT	CC	TT	TT	CC	TT	TT	CC	TT	CC	CC	CC	CC	TT	NN	TT	CC	TT	TT	TT	CC	TT	CC	CC	CC	CC	NN	TT	CC	TT	TT	CC	TT	TT
AX-94822260	2B	1832728	T/C	TT	TT	CC	TT	CC	TT	TT	TT	TT	TT	TT	TT	TT	TT	CC	CC	TT	CC	CC	TT	CC	NN	TT	TT	TT	CC	TT	TT	TT	CC	CC	CC	TT	TT	NN	TT	TT	TT	TT	CC	TT	CC	TT	TT	CC	CC
AX-95204634	2B	1832772	A/G	GG	GG	AA	AA	AA	AA	GG	AA	GG	AA	GG	AA	GG	AA	AA	AA	AA	AA	AA	AA	AA	AA	AA	AA	AA	AA	AA	GG	AA	AA	AA	AA	AA	GG	AA	AA	AA	AA	GG	AA	AA	AA	GG	AA	AA	AA
AX-94939920	2B	2109687	T/C	TT	TT	TT	TT	TT	TT	TT	CC	TT	CC	TT	CC	TT	CC	TT	TT	TT	TT	TT	TT	TT	TT	TT	TT	TT	TT	TT	TT	TT	TT	TT	TT	CC	TT	TT	TT	TT	TT	TT	TT	CC	TT	TT	TT	TT	TT
AX-95145976	2B	2116518	C/A	CC	CC	AA	AA	AA	AA	CC	CC	CC	CC	CC	CC	CC	CC	AA	CC	AA	AA	AA	CC	AA	CC	CC	CC	AA	CC	AA	CC	AA	CC	AA	CC	CC	CC	CC	CC	CC	CC	CC	CC	CC	AA	CC	CC	AA	AA
AX-94524136	2B	3303820	G/A	GG	GG	GG	GG	GG	GG	GG	AA	GG	AA	GG	AA	GG	AA	GG	AA	GG	GG	GG	AA	GG	AA	GG	AA	GG	AA	GG	GG	GG	AA	GG	AA	AA	GG	AA	AA	AA	AA	GG	AA	AA	GG	GG	AA	GG	GG
AX-94831339	2B	3405653	C/A	CC	AA	CC	CC	CC	CC	CC	CC	AA	CC	AA	CC	AA	CC	CC	CC	CC	CC	CC	AA	CC	AA	AA	AA	CC	CC	CC	CC	CC	CC	CC	CC	CC	CC	NN	NN	AA	AA	CC	CC	CC	CC	AA	AA	CC	CC
AX-94514951	2B	3438731	T/A	AA	AA	TT	TT	TT	TT	TT	TT	AA	TT	AA	TT	AA	TT	TT	AA	TT	TT	TT	AA	TT	AA	AA	AA	TT	AA	TT	AA	TT	AA	TT	AA	TT	TT	AA	AA	AA	AA	AA	AA	TT	TT	AA	AA	TT	TT
AX-94675099	2B	4663373	A/G	GG	GG	GG	AA	GG	GG	GG	AA	GG	AA	GG	GG	AA	AA	AA	AA	AA	AA	AA	AA	AA	AA	GG	AA	AA	AA	AA	GG	AA	AA	AA	AA	GG	GG	AA	AA	AA	AA	GG	AA	GG	GG	GG	AA	AA	AA
AX-94505732	2B	4720576	T/C	CC	CC	TT	TT	TT	TT	CC	TT	CC	TT	CC	CC	TT	TT	TT	TT	TT	TT	TT	TT	TT	TT	TT	TT	TT	TT	TT	CC	TT	TT	TT	TT	CC	CC	TT	TT	TT	TT	CC	TT	CC	TT	CC	TT	TT	TT
AX-95229529	2B	5828287	G/C	GG	GG	GG	GG	GG	GG	GG	CC	GG	CC	GG	CC	GG	CC	CC	GG	GG	GG	GG	GG	GG	GG	CC	GG	GG	GG	CC	GG	CC	GG	GG	GG	CC	GG	GG	GG	GG	GG	GG	GG	CC	GG	GG	GG	GG	GG
AX-94676644	2B	6186617	A/G	AA	GG	AA	GG	AA	GG	AA	AA	GG	AA	GG	AA	GG	AA	AA	AA	GG	AA	AA	GG	AA	GG	AA	GG	GG	AA	GG	GG	GG	AA	AA	AA	AA	AA	GG	GG	GG	GG	AA	AA	AA	AA	GG	GG	AA	AA
AX-95024633	2B	6210285	G/A	GG	GG	GG	GG	GG	GG	GG	AA	GG	AA	GG	AA	GG	AA	GG	GG	GG	GG	GG	GG	GG	GG	AA	GG	GG	GG	GG	GG	GG	GG	GG	GG	AA	GG	GG	GG	GG	GG	GG	GG	AA	GG	GG	GG	GG	GG
AX-95118494	2B	6734173	A/G	AA	AA	AA	AA	AA	AA	AA	AA	AA	AA	AA	AA	AA	AA	AA	AA	AA	GG	AA	GG	AA	GG	AA	AA	AA	AA	AA	AA	AA	AA	AA	AA	AA	AA	GG	AA	AA	AA	AA	AA	AA	AA	AA	GG	AA	GG
AX-95156485	2B	7068123	C/A	AA	AA	CC	CC	CC	CC	CC	CC	AA	CC	AA	CC	AA	CC	CC	AA	CC	CC	CC	AA	CC	AA	CC	AA	CC	AA	CC	AA	CC	AA	CC	AA	CC	CC	AA	AA	AA	AA	AA	AA	CC	CC	AA	AA	CC	CC
AX-94860003	2B	7108880	G/A	GG	GG	GG	GG	GG	AA	GG	AA	GG	AA	GG	AA	GG	AA	AA	GG	GG	GG	GG	GG	GG	GG	AA	GG	GG	GG	AA	GG	AA	GG	GG	GG	AA	GG	GG	GG	GG	GG	GG	GG	AA	GG	GG	GG	GG	GG
AX-95117913	2B	7431392	A/G	GG	AA	GG	AA	GG	AA	GG	AA	AA	AA	AA	AA	AA	AA	AA	GG	AA	GG	GG	AA	GG	AA	AA	AA	AA	GG	AA	AA	AA	GG	GG	GG	AA	GG	AA	AA	AA	AA	GG	GG	AA	GG	AA	AA	GG	GG
AX-94462312	2B	7579423	C/T	CC	CC	TT	CC	CC	CC	TT	CC	TT	CC	TT	CC	CC	CC	CC	CC	CC	CC	CC	CC	CC	CC	CC	CC	CC	CC	CC	CC	TT	TT	CC	CC	CC	CC	CC	CC	CC	CC	CC	CC	CC	TT	CC	CC	CC	CC
AX-94605257	2B	7654674	G/A	AA	GG	AA	GG	AA	GG	AA	NN	GG	GG	GG	GG	GG	NN	AA	AA	GG	AA	AA	GG	AA	GG	GG	GG	GG	AA	AA	GG	GG	AA	AA	AA	GG	NN	GG	GG	GG	GG	NN	AA	GG	AA	GG	GG	AA	AA
AX-94517549	2B	8217155	A/G	AA	AA	AA	AA	AA	GG	AA	GG	AA	GG	AA	GG	AA	GG	AA	AA	AA	AA	AA	AA	AA	AA	AA	AA	AA	AA	AA	AA	AA	AA	AA	AA	GG	AA	AA	AA	AA	AA	AA	AA	GG	AA	AA	AA	AA	AA
AX-94972565	2B	8250274	A/G	AA	AA	AA	AA	AA	GG	AA	GG	AA	GG	AA	GG	AA	GG	GG	AA	AA	AA	AA	AA	AA	AA	GG	AA	AA	AA	GG	AA	GG	AA	AA	AA	GG	AA	AA	AA	AA	AA	AA	AA	GG	AA	AA	AA	AA	AA
AX-94398726	2B	9018920	C/A	CC	CC	CC	CC	CC	CC	CC	CC	CC	CC	CC	CC	CC	CC	AA	CC	CC	CC	CC	CC	CC	CC	AA	CC	CC	CC	AA	CC	NN	CC	CC	CC	CC	CC	CC	CC	CC	CC	CC	CC	CC	CC	CC	CC	CC	CC
AX-95003568	2B	9620774	G/C	CC	CC	GG	GG	GG	GG	CC	GG	CC	GG	CC	GG	GG	GG	GG	GG	GG	GG	GG	GG	GG	GG	GG	GG	GG	GG	GG	CC	GG	GG	GG	GG	GG	CC	GG	GG	GG	GG	CC	GG	GG	GG	CC	GG	GG	GG
AX-94678068	2B	10176284	T/C	TT	TT	TT	TT	TT	TT	TT	CC	TT	CC	TT	CC	TT	CC	CC	TT	TT	TT	TT	TT	TT	TT	TT	TT	TT	TT	CC	TT	CC	TT	TT	TT	CC	TT	TT	TT	TT	TT	TT	TT	CC	TT	TT	TT	TT	TT
AX-94390683	2B	10618289	C/G	CC	CC	CC	GG	GG	GG	GG	CC	CC	CC	CC	CC	CC	CC	CC	CC	GG	GG	GG	CC	GG	CC	CC	GG	GG	CC	CC	CC	CC	CC	GG	CC	CC	GG	CC	CC	CC	CC	CC	CC	CC	GG	CC	CC	GG	GG
AX-94415921	2B	10781672	T/C	TT	TT	TT	CC	CC	CC	CC	TT	TT	TT	TT	TT	TT	TT	TT	TT	CC	CC	CC	TT	CC	TT	CC	CC	CC	TT	TT	TT	TT	TT	CC	TT	TT	CC	TT	TT	TT	TT	TT	TT	TT	CC	TT	TT	CC	CC
AX-94781121	2B	10782539	G/C	CC	CC	CC	GG	GG	GG	GG	GG	CC	GG	CC	GG	CC	GG	GG	CC	GG	GG	GG	CC	GG	CC	GG	GG	GG	CC	GG	CC	GG	CC	GG	CC	GG	GG	CC	CC	CC	CC	CC	CC	GG	GG	CC	CC	GG	GG
AX-94598642	2B	10784087	A/G	GG	AA	GG	AA	GG	AA	GG	AA	AA	AA	AA	AA	AA	AA	GG	GG	AA	GG	GG	AA	GG	AA	AA	AA	AA	GG	AA	AA	AA	GG	GG	GG	AA	GG	AA	AA	AA	AA	GG	GG	AA	GG	AA	AA	GG	GG
AX-95188754	2B	10829952	G/C	CC	CC	CC	GG	GG	NN	GG	GG	CC	GG	CC	GG	CC	GG	GG	CC	GG	GG	GG	CC	GG	CC	CC	GG	GG	CC	GG	CC	GG	CC	GG	CC	GG	GG	CC	CC	CC	CC	CC	CC	GG	GG	CC	CC	GG	GG
AX-95237487	2B	10854030	T/G	GG	GG	GG	TT	TT	TT	TT	TT	GG	TT	GG	TT	GG	TT	GG	GG	TT	TT	TT	GG	TT	GG	GG	TT	TT	GG	GG	GG	GG	GG	TT	GG	TT	TT	GG	GG	GG	GG	GG	GG	TT	TT	GG	GG	TT	TT
AX-94675867	2B	10868924	A/C	CC	AA	CC	CC	AA	AA	CC	AA	AA	AA	CC	AA	AA	AA	CC	CC	CC	AA	CC	CC	CC	AA	AA	CC	AA	CC	AA	CC	CC	CC	CC	AA	AA	CC	AA	AA	AA	AA	CC	AA	CC	CC	AA	AA	AA	AA
AX-94606966	2B	11077042	C/T	CC	CC	CC	TT	CC	TT	CC	TT	CC	TT	CC	TT	CC	TT	CC	CC	TT	CC	CC	CC	CC	CC	TT	TT	TT	CC	CC	CC	CC	CC	CC	CC	TT	CC	CC	CC	CC	CC	CC	CC	TT	CC	CC	CC	CC	CC
AX-95635011	2B	11077574	C/A	AA	AA	AA	CC	CC	CC	CC	CC	AA	CC	AA	CC	AA	CC	AA	AA	CC	CC	CC	AA	CC	AA	CC	CC	CC	AA	AA	AA	AA	AA	CC	AA	CC	CC	AA	AA	AA	AA	AA	AA	CC	CC	AA	AA	CC	CC
AX-94832414	2B	11291219	G/A	AA	AA	GG	GG	GG	GG	AA	GG	AA	GG	AA	GG	GG	GG	GG	GG	GG	GG	GG	GG	GG	GG	GG	GG	GG	GG	GG	AA	GG	GG	GG	GG	GG	AA	GG	GG	GG	GG	AA	GG	GG	GG	AA	GG	GG	GG
AX-94650282	2B	11458898	A/G	GG	GG	AA	AA	AA	AA	GG	AA	GG	AA	GG	AA	GG	AA	AA	GG	AA	GG	AA	GG	AA	GG	AA	GG	AA	GG	AA	GG	AA	GG	AA	GG	AA	GG	GG	GG	GG	GG	GG	GG	AA	AA	GG	GG	AA	AA
AX-95173587	2B	12076575	C/A	CC	CC	AA	AA	AA	AA	CC	CC	CC	CC	CC	AA	CC	CC	CC	CC	AA	CC	AA	CC	AA	CC	AA	CC	AA	CC	NN	CC	CC	CC	AA	CC	AA	CC	CC	CC	CC	CC	CC	CC	AA	AA	CC	CC	AA	AA
AX-94474254	2B	12076678	T/G	TT	GG	TT	TT	TT	TT	TT	TT	TT	TT	TT	TT	GG	TT	TT	GG	TT	GG	TT	GG	TT	GG	TT	GG	TT	GG	TT	TT	TT	GG	TT	GG	TT	TT	GG	GG	GG	GG	TT	GG	TT	TT	TT	GG	TT	TT
AX-94399171	2B	13043505	A/G	GG	AA	GG	AA	GG	AA	GG	AA	AA	AA	AA	AA	AA	AA	GG	GG	AA	GG	GG	AA	GG	AA	AA	AA	AA	GG	AA	AA	AA	GG	GG	GG	AA	GG	AA	AA	AA	AA	GG	GG	AA	GG	AA	AA	GG	GG
AX-94786386	2B	13473905	A/G	AA	AA	GG	GG	AA	AA	GG	AA	AA	AA	GG	AA	AA	AA	GG	GG	GG	AA	GG	GG	GG	AA	AA	GG	AA	GG	AA	AA	GG	GG	GG	AA	AA	GG	AA	AA	AA	AA	GG	AA	GG	GG	AA	AA	AA	AA
AX-95149201	2B	13480016	C/A	CC	AA	CC	AA	CC	CC	CC	CC	CC	CC	CC	CC	AA	CC	CC	AA	AA	AA	AA	AA	AA	AA	CC	AA	AA	AA	CC	CC	CC	AA	AA	AA	CC	CC	AA	AA	AA	CC	CC	AA	CC	CC	CC	AA	AA	AA
AX-94394314	2B	13492998	C/G	CC	CC	GG	CC	GG	GG	CC	GG	CC	GG	CC	GG	CC	GG	GG	CC	CC	CC	CC	CC	CC	CC	GG	CC	CC	CC	GG	CC	GG	CC	CC	CC	GG	CC	CC	CC	CC	CC	CC	CC	GG	GG	CC	CC	CC	CC
AX-94548077	2B	13767799	C/T	TT	CC	TT	CC	TT	TT	TT	CC	TT	CC	TT	CC	CC	CC	CC	CC	CC	CC	CC	CC	CC	CC	TT	CC	CC	CC	CC	TT	TT	CC	CC	CC	CC	TT	CC	CC	CC	CC	TT	CC	CC	TT	TT	CC	CC	CC
AX-94581569	2B	14834566	C/G	CC	NN	CC	GG	CC	CC	CC	CC	CC	CC	CC	CC	CC	CC	CC	CC	GG	CC	GG	CC	GG	CC	CC	CC	GG	CC	CC	CC	CC	CC	GG	CC	CC	CC	CC	CC	CC	CC	CC	CC	CC	CC	CC	CC	GG	GG
AX-94596584	2B	16196484	A/G	GG	AA	AA	AA	AA	AA	GG	GG	GG	GG	GG	GG	GG	GG	AA	GG	AA	GG	AA	GG	AA	GG	AA	GG	AA	GG	AA	GG	AA	GG	AA	GG	GG	GG	GG	GG	GG	AA	GG	GG	GG	AA	GG	GG	AA	AA
AX-95154971	2B	16268690	A/G	GG	AA	AA	AA	AA	AA	GG	AA	GG	AA	GG	AA	AA	AA	AA	AA	AA	AA	AA	AA	AA	AA	AA	AA	AA	AA	AA	GG	AA	AA	AA	AA	AA	GG	AA	AA	AA	AA	GG	AA	AA	AA	GG	AA	AA	AA
AX-94728323	2B	16276036	T/C	TT	TT	CC	TT	CC	TT	TT	TT	TT	TT	TT	TT	TT	TT	CC	CC	TT	CC	CC	TT	CC	TT	TT	TT	TT	CC	TT	TT	TT	CC	CC	CC	TT	TT	TT	TT	TT	TT	TT	CC	TT	CC	TT	TT	CC	CC
AX-94664467	2B	16826708	A/C	AA	CC	AA	CC	AA	AA	AA	CC	AA	CC	AA	CC	AA	CC	CC	AA	CC	AA	CC	AA	CC	AA	AA	AA	CC	AA	CC	AA	AA	AA	CC	AA	CC	AA	AA	AA	AA	AA	AA	AA	CC	AA	AA	AA	CC	CC
AX-94927177	2B	16897993	G/C	GG	NN	CC	GG	CC	CC	GG	GG	GG	GG	GG	GG	CC	GG	NN	CC	GG	CC	GG	CC	GG	CC	CC	CC	NN	CC	NN	GG	CC	CC	GG	CC	GG	GG	CC	CC	CC	CC	GG	CC	GG	CC	GG	CC	GG	GG
AX-94520248	2B	17080872	C/T	CC	CC	CC	TT	CC	CC	CC	CC	CC	TT	CC	TT	CC	TT	TT	CC	TT	CC	TT	CC	TT	CC	CC	CC	TT	CC	TT	CC	TT	CC	TT	CC	TT	CC	CC	CC	CC	CC	CC	CC	TT	CC	CC	CC	TT	TT
AX-94405643	2B	17229866	C/T	CC	CC	CC	CC	CC	CC	CC	CC	CC	CC	CC	CC	TT	CC	CC	TT	CC	TT	CC	TT	CC	TT	CC	TT	CC	TT	CC	CC	CC	TT	CC	TT	CC	CC	TT	TT	TT	NN	CC	TT	CC	CC	CC	TT	CC	CC
AX-95013184	2B	17365461	G/T	TT	GG	GG	GG	GG	GG	TT	GG	GG	GG	GG	GG	GG	GG	TT	GG	GG	GG	TT	GG	TT	GG	GG	GG	GG	GG	NN	GG	GG	GG	TT	GG	GG	GG	GG	GG	GG	GG	GG	GG	GG	GG	GG	GG	TT	TT
AX-94567009	2B	17466069	G/T	TT	GG	TT	GG	TT	GG	TT	GG	GG	GG	GG	GG	GG	GG	TT	GG	GG	GG	TT	GG	TT	GG	GG	GG	GG	GG	GG	GG	GG	GG	TT	GG	GG	TT	GG	GG	GG	GG	TT	GG	GG	TT	GG	GG	TT	TT
AX-94983323	2B	17495270	G/A	GG	AA	AA	GG	AA	AA	GG	AA	GG	GG	GG	GG	GG	GG	GG	GG	GG	GG	GG	GG	GG	GG	AA	GG	GG	GG	GG	GG	GG	GG	GG	GG	GG	GG	GG	GG	GG	GG	GG	GG	GG	AA	GG	GG	GG	GG
AX-94866977	2B	17778868	C/T	CC	TT	TT	CC	TT	TT	CC	TT	CC	CC	CC	CC	CC	CC	CC	CC	CC	CC	TT	CC	CC	CC	TT	CC	CC	CC	CC	CC	TT	CC	TT	CC	CC	CC	CC	CC	CC	CC	CC	CC	CC	TT	CC	CC	TT	TT
AX-95091124	2B	18275800	G/T	GG	GG	GG	GG	GG	GG	GG	GG	GG	GG	GG	GG	TT	GG	GG	TT	GG	TT	GG	TT	GG	TT	GG	TT	GG	TT	GG	GG	GG	TT	GG	TT	GG	GG	TT	TT	TT	TT	GG	TT	GG	GG	GG	TT	GG	GG
AX-94492158	2B	18912511	G/C	CC	GG	GG	GG	GG	GG	CC	GG	CC	CC	CC	CC	GG	CC	CC	GG	CC	GG	GG	GG	CC	GG	GG	GG	CC	GG	CC	CC	GG	GG	GG	GG	CC	CC	GG	GG	GG	GG	CC	GG	CC	GG	CC	GG	GG	GG
AX-95171245	2B	19070642	G/A	GG	GG	GG	GG	GG	GG	GG	GG	GG	GG	GG	GG	AA	GG	GG	AA	GG	AA	GG	AA	GG	AA	GG	AA	GG	AA	GG	GG	GG	AA	GG	AA	GG	GG	AA	AA	AA	AA	GG	AA	GG	GG	GG	AA	GG	GG
AX-95218398	2B	22308187	G/A	AA	GG	AA	GG	AA	GG	AA	GG	GG	GG	GG	GG	GG	GG	AA	AA	GG	AA	AA	GG	AA	GG	GG	GG	GG	AA	GG	GG	GG	AA	AA	AA	GG	AA	GG	GG	GG	GG	AA	AA	GG	AA	NN	GG	AA	AA
AX-95178463	2B	24090479	C/T	CC	CC	CC	TT	CC	CC	TT	CC	CC	CC	CC	CC	CC	CC	TT	CC	TT	CC	CC	CC	TT	CC	CC	CC	TT	CC	CC	CC	CC	CC	CC	CC	CC	TT	CC	CC	CC	CC	CC	CC	CC	CC	CC	CC	CC	CC
AX-94780013	2B	24108998	G/A	AA	GG	GG	AA	GG	GG	GG	GG	GG	GG	GG	GG	GG	GG	GG	GG	AA	GG	GG	GG	AA	AA	GG	GG	GG	GG	GG	GG	AA	GG	GG	GG	GG	GG	GG	GG	GG	GG	GG	GG	AA	GG	GG	GG	GG	GG
AX-94974196	2B	24853605	G/A	AA	GG	GG	GG	GG	GG	AA	GG	AA	GG	AA	GG	GG	GG	GG	GG	GG	GG	GG	GG	GG	GG	GG	GG	GG	GG	GG	AA	GG	GG	GG	GG	GG	AA	GG	GG	GG	GG	AA	GG	GG	GG	AA	GG	GG	GG
AX-95009540	2B	24853618	G/A	GG	GG	GG	GG	GG	GG	GG	GG	GG	GG	GG	GG	GG	GG	GG	GG	AA	GG	GG	GG	AA	GG	GG	GG	AA	GG	AA	GG	AA	GG	GG	GG	GG	GG	GG	GG	GG	GG	GG	GG	GG	GG	GG	GG	GG	GG
AX-94909085	2B	24861105	C/T	CC	CC	TT	CC	TT	CC	CC	CC	CC	CC	CC	CC	CC	CC	TT	CC	CC	CC	CC	CC	CC	CC	CC	CC	CC	CC	CC	CC	CC	CC	CC	CC	CC	CC	CC	CC	CC	CC	CC	CC	CC	TT	CC	CC	CC	CC
AX-95197220	2B	24913744	T/C	CC	CC	CC	TT	CC	TT	CC	TT	CC	TT	CC	TT	TT	TT	CC	TT	CC	TT	TT	TT	CC	TT	TT	TT	CC	TT	CC	CC	CC	TT	TT	TT	TT	CC	TT	TT	TT	TT	CC	TT	TT	CC	CC	TT	TT	TT
AX-95216074	2B	25017766	G/C	CC	CC	CC	GG	CC	GG	CC	GG	CC	GG	CC	GG	GG	GG	CC	GG	GG	GG	GG	GG	GG	GG	GG	GG	GG	GG	GG	CC	GG	GG	GG	GG	GG	CC	GG	GG	GG	GG	CC	GG	GG	CC	CC	GG	GG	GG
AX-94649604	2B	25250475	A/G	AA	GG	GG	AA	GG	AA	AA	AA	AA	AA	AA	AA	AA	AA	GG	AA	GG	AA	AA	AA	GG	AA	AA	AA	GG	AA	GG	AA	GG	AA	AA	AA	AA	AA	AA	AA	AA	GG	AA	AA	AA	GG	AA	AA	AA	AA
AX-94754932	2B	25452885	A/G	GG	GG	AA	AA	AA	AA	GG	AA	GG	AA	GG	AA	AA	AA	AA	AA	AA	AA	AA	AA	AA	AA	AA	AA	AA	AA	AA	GG	AA	AA	AA	AA	AA	GG	AA	AA	AA	AA	GG	AA	AA	AA	GG	AA	AA	AA
AX-94469326	2B	25594559	A/G	AA	AA	AA	AA	AA	AA	AA	AA	AA	AA	AA	AA	AA	AA	AA	AA	GG	AA	AA	AA	AA	AA	AA	AA	GG	AA	GG	AA	GG	AA	AA	AA	AA	AA	AA	AA	GG	AA	AA	AA	AA	AA	AA	AA	AA	AA
AX-94555182	2B	25736364	G/C	GG	GG	CC	GG	CC	GG	GG	GG	GG	GG	GG	GG	GG	GG	CC	CC	GG	CC	CC	GG	CC	GG	GG	GG	GG	CC	GG	GG	GG	CC	CC	CC	GG	NN	GG	GG	GG	GG	GG	CC	GG	CC	GG	GG	CC	CC
AX-94540532	2B	26106439	C/G	GG	GG	CC	GG	CC	GG	GG	CC	GG	GG	GG	CC	CC	GG	CC	CC	CC	CC	CC	CC	CC	CC	CC	CC	CC	CC	NN	GG	CC	CC	CC	CC	CC	GG	CC	CC	CC	CC	GG	CC	CC	CC	GG	CC	CC	GG
AX-94870786	2B	26297140	G/A	GG	GG	GG	AA	GG	AA	GG	GG	GG	AA	GG	GG	GG	AA	GG	GG	GG	GG	GG	GG	GG	GG	GG	GG	GG	GG	GG	GG	GG	GG	GG	GG	GG	GG	GG	GG	GG	GG	GG	GG	GG	GG	GG	GG	GG	AA
AX-94982382	2B	26590401	C/G	GG	GG	CC	CC	CC	CC	GG	CC	GG	CC	GG	CC	CC	CC	CC	CC	CC	CC	CC	CC	CC	CC	CC	CC	CC	CC	CC	GG	CC	CC	CC	CC	CC	GG	CC	CC	CC	CC	GG	CC	CC	CC	GG	CC	CC	CC
AX-95121217	2B	26998844	G/A	AA	GG	AA	AA	GG	GG	AA	GG	GG	GG	AA	GG	GG	GG	AA	AA	AA	GG	AA	AA	AA	GG	GG	AA	GG	AA	GG	AA	AA	AA	AA	GG	GG	AA	GG	GG	GG	GG	AA	GG	AA	AA	GG	GG	GG	GG
AX-94462571	2B	27735717	G/C	GG	GG	GG	GG	GG	GG	GG	GG	GG	GG	GG	GG	GG	GG	GG	GG	GG	GG	GG	GG	GG	GG	CC	GG	GG	GG	GG	GG	GG	GG	CC	GG	GG	GG	GG	GG	GG	GG	GG	GG	GG	GG	GG	GG	GG	GG
AX-94990648	2B	28340494	G/A	GG	GG	GG	AA	GG	AA	GG	GG	GG	AA	GG	GG	GG	AA	GG	GG	GG	GG	GG	GG	GG	GG	GG	GG	GG	GG	GG	GG	GG	GG	GG	GG	GG	GG	GG	GG	GG	GG	GG	GG	GG	GG	GG	GG	GG	AA
AX-94882684	2B	28450079	C/T	TT	TT	CC	TT	CC	TT	TT	CC	CC	TT	CC	CC	CC	TT	CC	CC	CC	CC	CC	CC	CC	CC	CC	CC	CC	CC	CC	TT	CC	CC	CC	CC	CC	TT	CC	CC	CC	CC	TT	CC	CC	CC	TT	CC	CC	TT
AX-94880110	2B	29156563	G/A	GG	AA	GG	GG	GG	GG	GG	AA	AA	GG	GG	AA	GG	GG	GG	GG	AA	GG	GG	GG	GG	GG	AA	GG	AA	GG	AA	AA	AA	GG	GG	GG	AA	GG	GG	GG	AA	GG	GG	GG	AA	GG	AA	GG	GG	GG
AX-94852865	2B	29993245	C/T	TT	TT	CC	CC	CC	CC	TT	CC	CC	CC	CC	CC	CC	CC	CC	CC	CC	CC	CC	CC	CC	CC	CC	CC	CC	CC	CC	TT	CC	CC	CC	CC	CC	TT	CC	CC	CC	CC	TT	CC	CC	CC	TT	CC	CC	CC
AX-94966965	2B	30158417	C/T	TT	TT	CC	CC	CC	CC	TT	CC	TT	TT	CC	CC	CC	CC	CC	CC	TT	CC	CC	CC	TT	CC	CC	CC	TT	CC	TT	TT	TT	CC	TT	CC	CC	TT	CC	CC	CC	CC	TT	CC	CC	CC	TT	CC	TT	CC
AX-95144846	2B	30498155	T/C	TT	TT	TT	TT	TT	TT	TT	TT	CC	CC	TT	TT	TT	TT	TT	TT	CC	TT	TT	TT	CC	TT	TT	TT	CC	TT	CC	TT	CC	TT	CC	TT	TT	TT	TT	TT	TT	TT	TT	TT	TT	TT	TT	TT	CC	TT
AX-95633084	2B	30499301	A/G	GG	GG	AA	AA	AA	AA	GG	AA	AA	AA	AA	AA	AA	AA	AA	AA	AA	AA	AA	AA	AA	AA	AA	AA	AA	GG	GG	GG	AA	AA	AA	AA	AA	GG	AA	AA	AA	AA	GG	AA	AA	AA	GG	AA	AA	AA
AX-95162762	2B	31399681	C/T	NN	CC	CC	TT	TT	NN	TT	CC	CC	CC	CC	CC	CC	CC	CC	CC	TT	TT	CC	TT	TT	CC	CC	TT	TT	CC	CC	TT	CC	CC	TT	TT	CC	TT	CC	CC	CC	TT	CC	CC	CC	CC	CC	TT	CC	TT
AX-94694632	2B	31613955	T/C	TT	TT	TT	TT	TT	TT	TT	TT	CC	CC	TT	TT	TT	TT	TT	TT	CC	TT	TT	TT	TT	TT	TT	TT	CC	TT	CC	TT	CC	TT	TT	TT	TT	TT	TT	TT	TT	TT	TT	TT	TT	TT	TT	TT	TT	TT
AX-94575146	2B	36795612	T/C	TT	TT	CC	TT	TT	TT	CC	CC	TT	TT	CC	TT	CC	TT	TT	CC	TT	CC	TT	CC	TT	TT	TT	CC	TT	CC	TT	TT	TT	CC	TT	CC	TT	TT	CC	CC	CC	TT	TT	CC	TT	CC	TT	CC	TT	TT
AX-94894705	2B	37741717	C/T	TT	TT	CC	CC	CC	CC	TT	CC	TT	CC	CC	CC	CC	CC	CC	CC	TT	CC	CC	CC	CC	CC	CC	CC	TT	CC	TT	TT	TT	CC	CC	CC	CC	TT	CC	CC	CC	CC	TT	CC	CC	CC	TT	CC	CC	CC
AX-94769600	2B	38895078	T/G	GG	GG	GG	GG	GG	TT	GG	TT	TT	TT	GG	TT	TT	TT	GG	GG	GG	TT	GG	GG	GG	TT	TT	GG	TT	GG	TT	GG	GG	GG	GG	TT	TT	GG	TT	TT	TT	TT	GG	TT	GG	GG	TT	TT	TT	TT
AX-94666545	2B	39205356	G/A	AA	AA	GG	GG	GG	GG	AA	GG	AA	GG	AA	GG	GG	GG	GG	GG	GG	GG	GG	GG	GG	GG	GG	GG	GG	GG	GG	AA	GG	GG	GG	GG	GG	AA	GG	GG	GG	GG	AA	GG	GG	GG	AA	GG	GG	GG
AX-94624893	2B	40066923	G/C	GG	GG	CC	GG	CC	GG	GG	CC	GG	CC	CC	CC	GG	GG	CC	GG	GG	GG	CC	GG	GG	GG	GG	GG	GG	GG	GG	GG	GG	GG	GG	GG	CC	GG	GG	GG	CC	GG	GG	GG	CC	CC	GG	GG	GG	GG
AX-94652634	2B	40905185	G/T	GG	GG	GG	GG	GG	GG	GG	GG	GG	NN	GG	GG	GG	GG	GG	GG	TT	GG	TT	GG	TT	GG	GG	GG	TT	GG	GG	GG	TT	GG	TT	GG	GG	GG	GG	GG	GG	GG	GG	GG	GG	GG	GG	GG	TT	GG
AX-94933020	2B	41146525	G/T	TT	TT	TT	GG	TT	GG	TT	TT	GG	TT	TT	TT	GG	GG	TT	GG	GG	GG	GG	GG	GG	GG	GG	GG	GG	GG	GG	TT	GG	GG	GG	GG	TT	TT	GG	GG	TT	GG	TT	GG	TT	TT	TT	GG	GG	GG
AX-95146413	2B	42276971	A/G	GG	GG	AA	AA	AA	AA	GG	AA	AA	GG	AA	AA	AA	AA	AA	AA	AA	AA	AA	AA	AA	AA	AA	AA	AA	AA	AA	GG	AA	AA	AA	AA	AA	GG	AA	AA	AA	AA	AA	AA	AA	AA	GG	AA	AA	AA
AX-94808342	2B	45617614	G/C	GG	GG	GG	GG	GG	CC	GG	GG	GG	CC	GG	GG	GG	GG	GG	GG	GG	CC	GG	GG	GG	GG	CC	GG	GG	GG	GG	NN	GG	GG	GG	GG	GG	GG	GG	GG	GG	GG	GG	GG	GG	GG	GG	GG	GG	GG
AX-94976984	2B	47158255	G/A	GG	AA	GG	AA	GG	GG	GG	AA	AA	GG	GG	GG	AA	AA	GG	GG	GG	GG	GG	AA	GG	AA	AA	AA	GG	GG	NN	GG	GG	GG	GG	GG	GG	GG	AA	GG	AA	AA	GG	GG	AA	GG	AA	AA	GG	GG
AX-94546045	2B	47425660	A/G	AA	AA	AA	AA	AA	GG	AA	AA	GG	AA	AA	AA	AA	AA	AA	AA	AA	GG	AA	AA	AA	AA	GG	AA	AA	AA	GG	AA	AA	AA	AA	AA	AA	AA	AA	AA	AA	AA	AA	AA	AA	AA	AA	AA	AA	AA
AX-94718390	2B	52187715	T/C	TT	TT	TT	TT	TT	CC	TT	TT	TT	TT	TT	TT	CC	TT	TT	CC	TT	TT	TT	TT	TT	TT	CC	CC	CC	CC	TT	TT	TT	TT	NN	CC	TT	TT	CC	CC	TT	TT	TT	CC	TT	TT	TT	CC	NN	TT
AX-94475892	2B	65230287	C/G	GG	GG	CC	CC	CC	CC	CC	CC	CC	CC	CC	GG	CC	CC	CC	CC	CC	CC	CC	CC	CC	CC	GG	CC	CC	CC	CC	GG	GG	CC	CC	CC	GG	CC	CC	CC	CC	CC	CC	CC	GG	GG	CC	CC	CC	GG
AX-94561290	2B	65375329	A/G	GG	GG	AA	AA	AA	AA	AA	AA	AA	AA	AA	GG	AA	AA	AA	AA	AA	AA	AA	AA	AA	AA	AA	AA	AA	AA	AA	GG	AA	AA	AA	AA	GG	AA	AA	AA	AA	AA	AA	AA	GG	GG	AA	AA	AA	GG
AX-94500296	2B	65463828	A/T	TT	TT	AA	AA	AA	AA	AA	AA	TT	AA	AA	TT	AA	AA	AA	AA	AA	AA	AA	AA	AA	AA	TT	AA	AA	AA	TT	TT	TT	AA	AA	AA	TT	AA	AA	AA	AA	AA	AA	AA	TT	TT	AA	AA	AA	TT
AX-95140591	2B	70850607	T/G	TT	GG	TT	TT	TT	GG	TT	GG	GG	GG	TT	TT	TT	GG	GG	TT	TT	GG	TT	TT	TT	TT	GG	TT	TT	GG	GG	TT	GG	TT	TT	TT	TT	TT	TT	TT	GG	TT	TT	TT	TT	GG	GG	TT	TT	GG
AX-94437617	2B	75607603	C/T	CC	CC	CC	CC	CC	TT	CC	TT	CC	TT	CC	CC	CC	TT	TT	TT	CC	TT	CC	CC	CC	CC	TT	TT	CC	TT	CC	CC	TT	CC	CC	CC	CC	CC	CC	CC	TT	CC	CC	CC	CC	CC	TT	CC	CC	TT
AX-94856684	2B	88928792	C/T	CC	TT	CC	CC	CC	CC	CC	CC	TT	CC	CC	CC	TT	CC	CC	CC	CC	TT	CC	TT	CC	CC	CC	CC	CC	CC	TT	CC	CC	CC	CC	CC	CC	CC	TT	CC	CC	CC	CC	CC	CC	NN	CC	TT	CC	CC
AX-94759687	2B	89315427	C/G	CC	GG	CC	CC	CC	GG	CC	GG	GG	GG	CC	CC	GG	GG	CC	CC	CC	GG	CC	GG	CC	GG	GG	CC	CC	CC	GG	CC	CC	CC	CC	CC	CC	CC	GG	CC	GG	CC	CC	CC	CC	GG	GG	GG	CC	CC
AX-95023682	2B	97935764	T/G	TT	GG	TT	TT	TT	GG	TT	GG	GG	GG	TT	TT	GG	GG	TT	TT	TT	GG	TT	GG	TT	GG	GG	TT	TT	TT	GG	TT	TT	TT	TT	TT	TT	TT	GG	TT	GG	TT	TT	TT	TT	GG	GG	GG	TT	TT
AX-94991417	2B	97935906	C/T	CC	TT	CC	CC	CC	CC	CC	TT	TT	TT	CC	CC	TT	CC	CC	CC	CC	TT	CC	CC	CC	TT	CC	CC	CC	CC	TT	CC	CC	CC	CC	CC	CC	CC	CC	CC	TT	CC	CC	CC	CC	CC	TT	CC	CC	CC
AX-95241300	2B	99756505	G/A	GG	AA	GG	GG	GG	GG	GG	GG	AA	GG	GG	GG	AA	GG	GG	GG	GG	AA	GG	AA	GG	AA	GG	GG	GG	GG	AA	GG	GG	GG	GG	GG	GG	GG	AA	GG	GG	GG	GG	GG	GG	AA	GG	AA	GG	GG
AX-94742508	2B	101070979	G/A	AA	GG	GG	GG	GG	GG	GG	GG	AA	GG	AA	GG	AA	GG	GG	AA	GG	AA	GG	AA	GG	AA	GG	AA	GG	AA	GG	AA	GG	AA	GG	AA	GG	GG	AA	AA	AA	AA	AA	AA	GG	GG	AA	AA	GG	GG
AX-94657721	2B	105688927	T/G	TT	GG	TT	TT	TT	TT	TT	TT	TT	TT	TT	TT	GG	TT	TT	TT	TT	TT	TT	GG	TT	GG	GG	TT	TT	TT	TT	TT	TT	TT	TT	TT	TT	TT	GG	TT	TT	TT	TT	TT	TT	GG	TT	GG	TT	TT
AX-94890326	2B	109209395	A/G	AA	GG	AA	AA	AA	AA	AA	AA	GG	AA	AA	AA	GG	AA	AA	AA	AA	GG	AA	GG	AA	GG	GG	AA	AA	AA	GG	AA	AA	AA	AA	AA	AA	AA	GG	AA	AA	AA	AA	AA	AA	GG	AA	GG	AA	AA
AX-94401839	2B	110572461	A/G	AA	AA	GG	GG	AA	AA	GG	AA	GG	GG	AA	AA	AA	GG	GG	GG	AA	GG	GG	AA	AA	AA	GG	GG	GG	GG	GG	AA	AA	GG	GG	GG	AA	AA	AA	GG	AA	AA	AA	GG	AA	GG	AA	AA	GG	GG
AX-94408246	2B	115209740	C/G	NN	CC	CC	CC	GG	GG	CC	CC	CC	CC	GG	GG	GG	CC	CC	CC	GG	CC	CC	GG	CC	GG	CC	CC	CC	CC	CC	GG	GG	CC	CC	CC	GG	CC	GG	CC	CC	CC	CC	CC	GG	CC	CC	GG	CC	CC
AX-95256964	2B	121229298	A/G	GG	AA	GG	GG	AA	AA	GG	AA	AA	AA	GG	AA	AA	AA	GG	GG	GG	AA	GG	GG	GG	AA	AA	GG	AA	GG	GG	GG	GG	GG	GG	AA	AA	GG	AA	AA	AA	AA	GG	AA	GG	GG	AA	AA	AA	AA
AX-94509365	2B	130137570	C/G	GG	CC	CC	CC	CC	CC	CC	CC	CC	CC	CC	CC	CC	CC	CC	CC	CC	CC	CC	CC	CC	CC	CC	GG	CC	CC	CC	CC	GG	CC	CC	GG	CC	GG	CC	CC	GG	CC	CC	GG	CC	CC	CC	CC	GG	GG
AX-94501322	2B	131571381	G/A	GG	AA	GG	GG	GG	GG	GG	GG	AA	GG	GG	GG	AA	GG	GG	GG	GG	AA	GG	AA	GG	AA	AA	GG	GG	GG	AA	GG	GG	GG	GG	GG	GG	GG	AA	GG	GG	GG	GG	GG	GG	AA	GG	AA	GG	GG
AX-94567166	2B	136809707	T/C	TT	CC	TT	TT	TT	TT	TT	TT	CC	TT	TT	TT	CC	TT	TT	TT	TT	CC	TT	CC	TT	CC	CC	TT	TT	TT	CC	TT	NN	TT	TT	TT	TT	TT	CC	TT	TT	TT	TT	TT	TT	CC	TT	CC	TT	TT
AX-94759165	2B	137214599	T/A	TT	TT	TT	TT	TT	TT	TT	TT	TT	TT	TT	TT	TT	TT	TT	TT	TT	AA	TT	AA	TT	AA	TT	TT	TT	TT	TT	TT	TT	TT	TT	TT	TT	TT	AA	TT	TT	TT	TT	TT	TT	TT	TT	AA	TT	TT
AX-95087802	2B	137440097	G/C	CC	CC	GG	GG	GG	GG	GG	GG	GG	GG	GG	GG	CC	GG	GG	CC	GG	GG	GG	GG	GG	GG	GG	CC	GG	GG	GG	CC	GG	GG	GG	GG	GG	GG	GG	GG	CC	GG	GG	GG	GG	GG	CC	GG	GG	GG
AX-94797659	2B	143484272	T/A	TT	AA	TT	TT	TT	TT	TT	TT	AA	TT	TT	TT	AA	TT	TT	TT	TT	AA	TT	AA	TT	AA	AA	TT	TT	TT	AA	TT	TT	TT	TT	TT	TT	TT	AA	TT	TT	TT	TT	TT	TT	AA	TT	AA	TT	TT
AX-94600493	2B	147491856	C/T	CC	TT	CC	CC	CC	CC	CC	CC	TT	CC	CC	CC	TT	CC	CC	CC	CC	CC	CC	TT	CC	TT	TT	CC	CC	CC	TT	CC	CC	CC	CC	CC	CC	CC	TT	CC	CC	CC	CC	CC	CC	TT	CC	TT	CC	CC
AX-94515318	2B	148589549	T/C	TT	CC	TT	TT	TT	TT	TT	TT	CC	TT	TT	TT	CC	TT	TT	TT	TT	TT	TT	TT	TT	TT	CC	TT	TT	TT	CC	TT	TT	TT	TT	TT	TT	TT	TT	TT	TT	TT	TT	TT	TT	CC	TT	TT	TT	TT
AX-94810283	2B	149842958	C/T	CC	TT	CC	CC	CC	CC	CC	CC	TT	CC	CC	CC	TT	CC	CC	CC	CC	CC	CC	CC	CC	CC	TT	CC	CC	CC	TT	CC	CC	CC	CC	CC	CC	CC	CC	CC	CC	CC	CC	CC	CC	TT	CC	CC	CC	CC
AX-95072580	2B	149964980	A/G	AA	AA	AA	AA	AA	AA	AA	GG	AA	AA	AA	AA	AA	AA	GG	AA	AA	AA	AA	AA	GG	AA	AA	AA	AA	AA	AA	AA	AA	AA	GG	AA	AA	AA	AA	AA	AA	GG	AA	AA	AA	AA	AA	AA	GG	AA
AX-94470642	2B	150200324	C/T	CC	TT	CC	CC	CC	CC	CC	CC	CC	CC	CC	CC	TT	CC	CC	CC	CC	CC	CC	CC	CC	CC	TT	CC	CC	CC	CC	CC	CC	CC	CC	CC	CC	CC	CC	CC	CC	CC	CC	CC	CC	TT	CC	CC	CC	CC
AX-95182921	2B	153124573	T/C	TT	TT	CC	TT	CC	TT	TT	TT	TT	TT	TT	NN	TT	TT	TT	TT	TT	TT	TT	CC	TT	NN	TT	TT	TT	TT	TT	TT	CC	CC	TT	TT	TT	TT	NN	TT	TT	TT	TT	CC	TT	NN	TT	NN	TT	TT
AX-94609661	2B	154911384	G/A	GG	GG	GG	GG	GG	GG	GG	GG	AA	GG	GG	GG	GG	GG	GG	GG	GG	GG	GG	AA	GG	AA	GG	GG	GG	GG	AA	GG	GG	GG	GG	GG	GG	GG	AA	GG	GG	GG	GG	GG	GG	GG	GG	AA	GG	GG
AX-94611194	2B	157694173	C/G	CC	CC	CC	CC	CC	CC	CC	CC	CC	CC	CC	CC	CC	CC	CC	CC	CC	CC	CC	GG	CC	GG	CC	CC	CC	CC	CC	CC	CC	CC	CC	CC	CC	CC	GG	CC	CC	CC	CC	CC	CC	CC	CC	GG	CC	CC
AX-95088904	2B	159207739	C/T	CC	CC	CC	CC	CC	CC	CC	CC	TT	CC	CC	CC	CC	CC	CC	CC	CC	CC	CC	CC	CC	CC	CC	CC	CC	CC	TT	CC	CC	CC	CC	CC	CC	CC	CC	CC	CC	CC	CC	CC	CC	CC	CC	CC	CC	TT
AX-94838287	2B	159574066	A/G	AA	GG	AA	AA	AA	AA	AA	AA	GG	AA	AA	AA	GG	AA	AA	AA	AA	AA	AA	GG	AA	GG	GG	AA	AA	AA	GG	AA	AA	AA	AA	AA	AA	AA	GG	AA	AA	AA	AA	AA	AA	GG	AA	GG	AA	GG
AX-94761935	2B	161416898	G/C	GG	CC	GG	GG	GG	GG	GG	GG	GG	GG	GG	GG	CC	GG	GG	GG	GG	CC	GG	CC	GG	CC	CC	GG	GG	GG	GG	GG	GG	GG	GG	GG	GG	GG	CC	GG	GG	GG	GG	GG	GG	CC	GG	CC	GG	CC
AX-94410965	2B	162629219	C/T	CC	CC	CC	CC	CC	CC	CC	CC	CC	CC	CC	CC	CC	CC	CC	CC	CC	TT	CC	TT	CC	TT	CC	CC	CC	CC	CC	CC	CC	CC	CC	CC	CC	CC	TT	CC	CC	CC	CC	CC	CC	CC	CC	TT	CC	TT
AX-94622328	2B	162927995	T/G	TT	TT	TT	TT	TT	TT	TT	TT	TT	TT	TT	TT	TT	TT	TT	TT	TT	GG	TT	GG	TT	GG	TT	TT	TT	TT	TT	TT	TT	TT	TT	TT	TT	TT	GG	TT	TT	TT	TT	TT	TT	TT	TT	GG	TT	GG
AX-95081080	2B	164938804	T/C	TT	TT	TT	TT	TT	TT	TT	TT	TT	TT	TT	TT	TT	TT	CC	TT	CC	TT	CC	TT	TT	TT	TT	TT	TT	CC	TT	TT	TT	TT	CC	TT	TT	TT	TT	CC	TT	CC	TT	CC	TT	TT	TT	TT	CC	TT
AX-94560891	2B	174592316	G/C	GG	CC	GG	GG	GG	GG	GG	GG	CC	GG	GG	GG	CC	GG	CC	GG	CC	CC	CC	CC	GG	CC	GG	GG	GG	CC	CC	GG	GG	GG	CC	GG	GG	GG	CC	CC	GG	CC	GG	CC	GG	CC	GG	CC	CC	CC
AX-94797912	2B	174931415	G/A	GG	GG	GG	GG	GG	GG	GG	GG	AA	GG	GG	GG	GG	GG	GG	AA	GG	GG	GG	GG	GG	GG	AA	GG	GG	GG	AA	GG	AA	GG	GG	GG	GG	GG	GG	GG	GG	GG	GG	GG	GG	GG	GG	GG	GG	GG
AX-95225651	2B	175459088	T/C	TT	TT	TT	TT	TT	TT	TT	TT	TT	TT	TT	TT	TT	TT	TT	CC	TT	TT	TT	TT	TT	TT	CC	TT	TT	TT	TT	TT	CC	TT	TT	TT	TT	TT	TT	TT	TT	TT	TT	TT	TT	TT	TT	TT	TT	TT
AX-94944413	2B	180543479	A/G	AA	AA	AA	AA	AA	AA	AA	AA	AA	AA	AA	AA	AA	AA	AA	GG	AA	AA	AA	AA	AA	AA	GG	AA	AA	AA	AA	AA	GG	AA	AA	AA	AA	AA	AA	AA	AA	AA	AA	AA	AA	AA	AA	AA	AA	GG
AX-95100361	2B	182012060	T/G	TT	TT	TT	TT	TT	TT	TT	TT	TT	TT	TT	TT	TT	TT	TT	TT	TT	TT	TT	TT	TT	TT	TT	TT	TT	TT	TT	TT	TT	TT	TT	TT	TT	TT	TT	TT	TT	TT	TT	TT	TT	TT	TT	TT	TT	GG
AX-94631531	2B	183262701	T/G	TT	GG	TT	TT	TT	TT	TT	TT	GG	TT	TT	TT	GG	TT	GG	GG	GG	GG	GG	GG	TT	GG	GG	TT	TT	GG	GG	TT	GG	TT	GG	TT	TT	TT	GG	GG	TT	TT	TT	TT	TT	GG	TT	GG	TT	TT
AX-94611935	2B	183315457	T/C	TT	CC	TT	TT	TT	TT	TT	TT	CC	TT	TT	TT	CC	TT	CC	CC	CC	CC	CC	CC	TT	CC	CC	TT	TT	CC	CC	TT	CC	TT	CC	TT	TT	TT	CC	CC	TT	TT	TT	TT	TT	CC	TT	CC	TT	CC
AX-94412427	2B	184661557	C/G	CC	GG	CC	CC	CC	CC	CC	CC	GG	CC	CC	CC	GG	CC	GG	GG	GG	GG	GG	GG	CC	GG	GG	CC	CC	GG	GG	CC	GG	CC	GG	CC	CC	CC	GG	GG	CC	CC	CC	CC	CC	GG	CC	GG	CC	CC
AX-94553340	2B	185806932	C/G	CC	GG	CC	CC	CC	CC	CC	CC	GG	CC	CC	CC	GG	CC	CC	CC	CC	CC	CC	CC	CC	CC	GG	CC	CC	CC	GG	CC	CC	CC	CC	CC	CC	CC	CC	CC	CC	CC	CC	CC	CC	GG	CC	CC	CC	CC
AX-94648480	2B	188262120	T/G	TT	GG	TT	TT	TT	TT	TT	TT	GG	TT	TT	TT	GG	TT	GG	GG	GG	GG	GG	GG	TT	GG	GG	TT	TT	GG	GG	TT	GG	TT	GG	TT	TT	TT	GG	GG	TT	TT	TT	TT	TT	GG	TT	GG	TT	GG
AX-95652333	2B	189603490	G/A	GG	AA	GG	GG	GG	GG	GG	GG	GG	GG	GG	GG	AA	GG	AA	AA	AA	AA	AA	AA	GG	AA	GG	GG	GG	AA	GG	GG	AA	GG	AA	GG	GG	GG	AA	AA	GG	GG	GG	GG	GG	AA	GG	AA	GG	AA
AX-94577657	2B	189766146	C/T	CC	CC	TT	TT	CC	CC	TT	CC	CC	CC	TT	CC	TT	CC	TT	TT	TT	CC	TT	TT	TT	TT	TT	TT	CC	TT	CC	CC	TT	TT	TT	CC	CC	TT	TT	CC	TT	CC	TT	CC	TT	TT	CC	TT	CC	CC
AX-95094442	2B	190226470	T/G	TT	TT	GG	GG	GG	GG	TT	GG	TT	GG	TT	TT	GG	GG	GG	TT	TT	TT	TT	GG	TT	GG	GG	TT	TT	GG	TT	TT	GG	GG	TT	TT	TT	TT	GG	TT	GG	TT	TT	TT	TT	GG	TT	GG	TT	TT
AX-95234142	2B	202914888	G/A	GG	GG	GG	GG	GG	GG	GG	GG	GG	GG	GG	GG	AA	GG	GG	AA	GG	GG	GG	AA	GG	AA	GG	AA	AA	AA	GG	GG	GG	AA	GG	GG	GG	GG	AA	AA	AA	GG	GG	AA	GG	GG	GG	GG	GG	GG
AX-94449050	2B	206116538	T/G	TT	GG	TT	TT	TT	TT	TT	TT	TT	TT	TT	TT	GG	TT	GG	GG	GG	GG	GG	GG	TT	GG	GG	TT	TT	GG	TT	TT	GG	TT	GG	TT	TT	TT	GG	GG	TT	TT	TT	TT	TT	GG	TT	GG	TT	TT
AX-95188161	2B	206374709	T/C	TT	CC	TT	TT	TT	TT	TT	TT	TT	TT	TT	TT	CC	TT	CC	CC	CC	CC	CC	CC	TT	CC	CC	TT	TT	CC	TT	TT	CC	TT	CC	TT	TT	TT	CC	CC	TT	TT	TT	TT	TT	CC	TT	CC	TT	CC
AX-94477389	2B	210842751	C/T	TT	TT	CC	TT	TT	CC	CC	CC	CC	CC	CC	CC	TT	CC	TT	TT	TT	TT	TT	TT	TT	TT	TT	TT	CC	TT	CC	TT	TT	CC	TT	CC	CC	TT	TT	TT	CC	CC	TT	CC	CC	TT	CC	TT	CC	CC
AX-94506088	2B	211530594	T/A	TT	TT	AA	TT	TT	AA	AA	AA	AA	AA	AA	AA	TT	AA	TT	TT	TT	TT	TT	TT	TT	TT	TT	TT	AA	TT	AA	TT	TT	AA	TT	AA	AA	TT	TT	TT	AA	AA	TT	AA	AA	TT	AA	TT	AA	TT
AX-94480449	2B	211872726	C/G	CC	GG	CC	CC	CC	CC	CC	CC	CC	CC	CC	CC	GG	CC	CC	CC	CC	GG	CC	GG	CC	GG	GG	CC	CC	CC	CC	CC	CC	CC	CC	CC	CC	CC	GG	CC	CC	CC	CC	CC	CC	GG	CC	GG	CC	GG
AX-95098387	2B	212578627	C/T	CC	CC	CC	TT	TT	TT	TT	CC	CC	CC	CC	CC	CC	CC	CC	CC	TT	TT	TT	CC	TT	CC	TT	TT	TT	CC	CC	CC	CC	CC	TT	CC	CC	TT	CC	CC	CC	CC	CC	CC	CC	TT	CC	CC	TT	TT
AX-94710527	2B	212582097	A/C	AA	AA	AA	AA	AA	AA	AA	CC	AA	CC	AA	CC	AA	CC	CC	AA	AA	AA	AA	AA	AA	AA	AA	AA	AA	AA	CC	AA	CC	AA	AA	AA	CC	AA	AA	AA	AA	AA	AA	AA	CC	AA	AA	AA	AA	AA
AX-95219670	2B	214286940	A/G	GG	AA	AA	GG	GG	AA	AA	AA	AA	AA	AA	AA	AA	AA	GG	GG	GG	AA	GG	AA	GG	AA	AA	GG	AA	GG	AA	GG	GG	AA	GG	AA	AA	GG	AA	GG	AA	AA	GG	AA	AA	AA	AA	AA	AA	AA
AX-94441235	2B	222489454	C/T	CC	CC	CC	CC	CC	CC	CC	TT	CC	CC	CC	CC	CC	CC	TT	CC	CC	CC	CC	CC	TT	CC	CC	CC	CC	CC	CC	CC	CC	CC	TT	CC	CC	CC	CC	CC	CC	TT	CC	CC	CC	CC	CC	CC	TT	CC
AX-95192394	2B	223730264	G/A	GG	AA	GG	GG	GG	GG	GG	GG	GG	GG	GG	GG	AA	GG	GG	GG	GG	GG	GG	GG	GG	GG	AA	GG	GG	GG	GG	GG	GG	GG	GG	GG	GG	GG	GG	GG	GG	GG	GG	GG	GG	AA	GG	GG	GG	AA
AX-95259776	2B	228655175	A/G	GG	AA	GG	AA	GG	GG	GG	GG	AA	AA	AA	AA	AA	GG	AA	AA	GG	AA	AA	AA	AA	AA	GG	AA	AA	AA	AA	GG	AA	GG	AA	AA	AA	AA	AA	GG	GG	AA	GG	AA	AA	GG	GG	AA	AA	AA
AX-95201756	2B	232349006	A/G	AA	AA	AA	AA	AA	AA	AA	AA	AA	AA	AA	AA	GG	AA	AA	AA	AA	GG	AA	GG	AA	GG	AA	AA	AA	AA	AA	AA	AA	AA	AA	AA	AA	AA	GG	AA	AA	AA	AA	AA	AA	AA	AA	GG	AA	AA
AX-94531748	2B	237967226	C/T	CC	CC	CC	CC	CC	CC	CC	CC	CC	CC	CC	CC	TT	CC	CC	CC	CC	TT	CC	TT	CC	TT	CC	CC	CC	CC	CC	CC	CC	CC	CC	CC	CC	CC	TT	CC	CC	CC	CC	CC	CC	CC	CC	TT	CC	TT
AX-94526347	2B	245130139	T/C	CC	CC	TT	CC	CC	TT	TT	TT	TT	TT	TT	TT	CC	TT	CC	CC	CC	CC	CC	CC	CC	CC	CC	CC	TT	CC	TT	CC	CC	TT	CC	TT	TT	CC	CC	CC	TT	TT	CC	TT	TT	CC	TT	CC	TT	CC
AX-94937350	2B	247935161	G/T	TT	TT	GG	TT	TT	GG	GG	GG	GG	GG	GG	GG	TT	GG	TT	TT	TT	TT	TT	TT	TT	TT	TT	TT	GG	TT	GG	TT	TT	GG	TT	GG	GG	TT	TT	TT	GG	GG	TT	GG	GG	TT	GG	TT	GG	GG
AX-94607968	2B	249264993	T/G	TT	TT	TT	TT	TT	TT	TT	TT	GG	TT	TT	TT	GG	TT	TT	TT	TT	GG	TT	GG	TT	GG	TT	TT	TT	TT	GG	TT	TT	TT	TT	TT	TT	TT	GG	TT	TT	TT	TT	TT	TT	TT	TT	GG	TT	GG
AX-94421649	2B	249418689	G/C	GG	GG	GG	GG	GG	GG	GG	GG	CC	GG	GG	GG	GG	GG	GG	GG	GG	GG	GG	GG	GG	GG	GG	GG	GG	GG	CC	GG	GG	GG	GG	GG	GG	GG	GG	GG	GG	GG	GG	GG	GG	GG	GG	GG	GG	CC
AX-94524231	2B	290678905	T/C	TT	TT	TT	TT	TT	TT	TT	TT	TT	TT	TT	TT	CC	TT	TT	TT	TT	CC	TT	CC	TT	CC	TT	TT	TT	TT	TT	NN	TT	TT	TT	TT	TT	TT	CC	TT	TT	TT	TT	TT	TT	TT	TT	CC	TT	TT
AX-94943476	2B	331032459	C/A	CC	CC	CC	CC	CC	CC	CC	AA	CC	AA	CC	CC	AA	CC	CC	CC	CC	AA	CC	CC	CC	CC	CC	CC	CC	CC	CC	NN	CC	CC	CC	CC	CC	CC	CC	CC	CC	CC	CC	CC	CC	CC	CC	AA	AA	CC
AX-94531605	2B	339207308	C/G	CC	CC	CC	CC	CC	CC	CC	CC	GG	CC	CC	CC	GG	CC	CC	CC	CC	GG	CC	GG	CC	GG	CC	CC	CC	CC	GG	CC	CC	CC	CC	CC	CC	CC	GG	CC	CC	CC	CC	CC	CC	CC	CC	GG	CC	GG
AX-94403602	2B	348089012	C/T	TT	TT	CC	TT	TT	CC	CC	CC	CC	CC	CC	CC	CC	CC	TT	TT	TT	CC	TT	CC	TT	CC	TT	TT	CC	TT	CC	TT	TT	CC	TT	CC	CC	TT	CC	TT	CC	CC	TT	CC	CC	TT	CC	CC	CC	CC
AX-94425235	2B	365982748	C/A	CC	CC	CC	CC	CC	CC	CC	CC	CC	CC	CC	CC	AA	CC	CC	CC	CC	AA	CC	AA	CC	AA	CC	CC	CC	CC	CC	NN	CC	CC	CC	CC	CC	CC	AA	CC	CC	CC	CC	CC	CC	CC	CC	AA	CC	CC
AX-94851753	2B	384670276	C/A	CC	CC	CC	CC	CC	CC	CC	CC	CC	CC	CC	CC	AA	CC	CC	CC	CC	CC	CC	AA	CC	AA	CC	AA	CC	CC	CC	CC	CC	CC	CC	CC	CC	CC	AA	CC	AA	CC	CC	CC	CC	CC	CC	AA	CC	CC
AX-95684719	2B	390363021	G/A	GG	GG	GG	GG	GG	AA	GG	GG	GG	GG	GG	GG	AA	GG	GG	AA	GG	GG	GG	GG	GG	GG	AA	AA	GG	AA	AA	NN	GG	GG	GG	AA	GG	GG	AA	AA	GG	GG	GG	AA	GG	GG	GG	AA	GG	GG
AX-94840049	2B	393461060	G/A	GG	GG	AA	AA	GG	GG	AA	GG	GG	GG	AA	GG	GG	GG	AA	AA	AA	GG	AA	AA	AA	GG	GG	AA	GG	AA	AA	GG	AA	AA	AA	GG	GG	AA	GG	GG	GG	GG	AA	GG	AA	AA	GG	GG	GG	GG
AX-94905386	2B	399939962	T/C	CC	TT	TT	TT	TT	CC	TT	TT	TT	TT	TT	CC	TT	TT	CC	CC	TT	CC	TT	CC	TT	CC	TT	TT	TT	CC	TT	TT	CC	CC	TT	TT	CC	TT	CC	TT	TT	CC	TT	CC	TT	TT	TT	CC	TT	TT
AX-94633928	2B	408168434	A/G	AA	AA	AA	AA	AA	AA	AA	AA	AA	AA	AA	AA	GG	AA	AA	AA	AA	GG	AA	GG	AA	GG	AA	AA	AA	AA	AA	AA	AA	AA	AA	AA	AA	AA	GG	AA	AA	AA	AA	AA	AA	AA	AA	GG	AA	GG
AX-94733816	2B	433988286	A/G	AA	AA	AA	AA	AA	AA	AA	GG	AA	AA	AA	AA	AA	AA	GG	AA	AA	AA	AA	AA	GG	AA	AA	AA	AA	AA	AA	AA	AA	AA	GG	AA	AA	AA	AA	NN	AA	GG	AA	AA	AA	AA	AA	AA	GG	AA
AX-94477824	2B	452811185	A/G	AA	AA	AA	AA	AA	AA	AA	AA	GG	AA	AA	AA	GG	AA	AA	AA	AA	GG	AA	AA	AA	GG	AA	AA	AA	AA	GG	AA	AA	AA	AA	AA	AA	AA	GG	AA	AA	AA	AA	AA	AA	AA	AA	GG	AA	GG
AX-94457623	2B	507968490	A/G	AA	GG	AA	AA	AA	AA	AA	AA	NN	AA	AA	AA	GG	AA	AA	AA	AA	GG	AA	GG	AA	GG	GG	AA	AA	AA	AA	AA	AA	AA	AA	AA	AA	AA	GG	AA	AA	AA	AA	AA	AA	GG	AA	GG	AA	AA
AX-94556627	2B	515914452	G/T	TT	GG	TT	TT	GG	GG	TT	GG	GG	GG	TT	GG	GG	GG	TT	TT	TT	GG	TT	TT	TT	GG	GG	TT	GG	TT	GG	TT	TT	TT	TT	GG	GG	TT	GG	GG	GG	GG	TT	GG	TT	TT	GG	GG	GG	GG
AX-94812041	2B	518767277	A/G	AA	GG	NN	AA	AA	AA	AA	AA	GG	AA	AA	AA	GG	AA	GG	GG	GG	GG	GG	GG	AA	GG	GG	AA	AA	GG	GG	GG	GG	AA	GG	AA	AA	AA	GG	GG	AA	AA	AA	AA	AA	GG	AA	GG	AA	GG
AX-94617111	2B	520184918	A/G	AA	AA	AA	AA	AA	AA	AA	AA	GG	AA	AA	GG	AA	AA	AA	AA	AA	AA	AA	AA	AA	AA	AA	AA	AA	AA	GG	AA	AA	AA	AA	NN	GG	AA	AA	AA	AA	AA	AA	AA	GG	AA	AA	AA	AA	AA
AX-94467482	2B	527308537	G/T	TT	TT	GG	GG	GG	GG	TT	GG	GG	GG	GG	GG	GG	GG	GG	GG	GG	GG	GG	GG	GG	GG	GG	GG	GG	GG	GG	TT	GG	GG	GG	GG	GG	TT	GG	GG	GG	GG	TT	GG	GG	GG	NN	GG	GG	GG
AX-95097906	2B	545433815	T/C	CC	TT	TT	CC	TT	TT	TT	TT	CC	TT	TT	CC	TT	TT	CC	CC	CC	TT	CC	CC	CC	TT	CC	CC	TT	CC	CC	CC	CC	TT	CC	CC	TT	CC	TT	TT	TT	TT	CC	TT	TT	TT	TT	TT	TT	TT
AX-94507617	2B	546614090	C/A	CC	AA	CC	CC	AA	CC	CC	CC	CC	CC	CC	AA	AA	CC	CC	CC	CC	CC	CC	CC	CC	AA	CC	CC	CC	CC	CC	CC	CC	CC	CC	CC	CC	CC	AA	CC	CC	CC	CC	CC	CC	CC	CC	AA	CC	CC
AX-94707852	2B	548396109	G/T	GG	GG	TT	TT	GG	GG	GG	TT	TT	GG	GG	GG	TT	GG	GG	GG	GG	GG	GG	GG	TT	GG	GG	TT	TT	GG	TT	TT	GG	GG	GG	GG	GG	GG	GG	GG	TT	GG	GG	GG	TT	GG	TT	GG	GG	GG
AX-94661570	2B	549196664	C/T	TT	CC	CC	TT	CC	CC	CC	CC	CC	CC	CC	TT	TT	CC	TT	TT	TT	CC	TT	TT	TT	TT	CC	TT	CC	TT	CC	TT	CC	CC	TT	CC	CC	TT	TT	CC	CC	CC	TT	CC	CC	CC	CC	TT	CC	CC
AX-94415371	2B	553873794	A/G	AA	AA	AA	AA	AA	AA	AA	AA	GG	AA	AA	GG	AA	AA	AA	AA	AA	AA	AA	AA	AA	AA	GG	AA	AA	AA	GG	AA	GG	AA	AA	AA	AA	GG	AA	AA	AA	AA	AA	AA	AA	AA	AA	AA	AA	AA
AX-94514458	2B	554292670	C/G	GG	CC	CC	GG	CC	CC	CC	CC	CC	CC	CC	CC	CC	CC	GG	NN	NN	CC	GG	GG	GG	CC	CC	GG	CC	GG	CC	GG	CC	CC	GG	CC	CC	CC	CC	CC	CC	CC	GG	CC	CC	CC	CC	CC	CC	CC
AX-95146301	2B	564232296	G/A	AA	AA	GG	AA	AA	GG	GG	GG	GG	GG	GG	AA	AA	GG	AA	AA	AA	GG	AA	AA	AA	AA	GG	AA	GG	AA	GG	AA	GG	GG	AA	GG	GG	GG	AA	GG	GG	GG	AA	GG	GG	GG	GG	AA	GG	GG
AX-95685439	2B	564877339	G/A	AA	AA	GG	AA	AA	GG	GG	GG	GG	GG	GG	AA	AA	GG	AA	AA	AA	GG	AA	AA	AA	AA	GG	AA	GG	AA	GG	AA	GG	GG	AA	GG	GG	GG	AA	GG	GG	GG	AA	GG	GG	GG	GG	AA	GG	GG
AX-94975304	2B	579572009	C/G	GG	GG	CC	GG	GG	CC	CC	CC	GG	CC	CC	GG	GG	CC	GG	GG	GG	CC	GG	GG	GG	GG	GG	GG	CC	GG	GG	GG	GG	CC	GG	CC	CC	CC	GG	CC	CC	CC	GG	CC	CC	CC	CC	GG	CC	CC
AX-95216527	2B	582298650	G/A	GG	GG	GG	GG	GG	AA	GG	GG	GG	AA	GG	AA	GG	GG	GG	AA	GG	AA	GG	GG	GG	GG	GG	GG	GG	GG	GG	GG	AA	GG	GG	GG	AA	GG	GG	GG	GG	GG	GG	GG	GG	GG	GG	GG	GG	GG
AX-94605098	2B	593658489	T/C	TT	TT	TT	CC	TT	TT	TT	TT	CC	TT	TT	CC	CC	TT	CC	CC	CC	TT	CC	CC	CC	CC	CC	CC	TT	CC	CC	TT	CC	TT	CC	TT	TT	TT	CC	TT	TT	TT	CC	TT	TT	TT	TT	CC	TT	TT
AX-94519543	2B	604994794	C/T	CC	CC	CC	CC	CC	CC	CC	CC	CC	CC	CC	CC	TT	CC	CC	CC	CC	CC	CC	CC	CC	TT	TT	CC	CC	CC	CC	CC	CC	CC	CC	CC	CC	CC	TT	CC	CC	CC	CC	CC	CC	CC	CC	TT	CC	CC
AX-94684543	2B	612213266	C/T	NN	CC	CC	CC	NN	TT	CC	CC	CC	TT	CC	CC	CC	CC	CC	CC	CC	CC	CC	CC	CC	CC	CC	CC	CC	CC	CC	CC	CC	CC	CC	CC	TT	CC	CC	CC	CC	TT	CC	CC	CC	CC	CC	CC	CC	TT
AX-94522698	2B	622921934	A/G	AA	AA	AA	GG	AA	AA	AA	AA	GG	AA	AA	AA	AA	AA	GG	GG	GG	AA	GG	GG	GG	AA	AA	GG	GG	GG	GG	AA	GG	AA	GG	AA	AA	GG	AA	AA	AA	AA	GG	AA	AA	AA	AA	AA	AA	AA
AX-95629837	2B	635023649	C/A	AA	AA	CC	CC	AA	CC	CC	CC	CC	CC	CC	CC	AA	CC	CC	CC	CC	CC	CC	CC	CC	AA	CC	CC	CC	CC	CC	AA	CC	CC	CC	CC	CC	CC	AA	CC	CC	CC	CC	CC	CC	CC	CC	AA	CC	CC
AX-94986215	2B	636112718	C/T	TT	TT	CC	CC	TT	CC	CC	CC	CC	CC	CC	CC	TT	CC	CC	CC	CC	CC	CC	CC	CC	TT	CC	CC	CC	CC	CC	TT	CC	CC	CC	CC	CC	CC	TT	CC	CC	CC	CC	CC	CC	CC	CC	TT	CC	CC
AX-95182756	2B	666936360	C/T	CC	CC	TT	TT	CC	CC	TT	CC	CC	CC	TT	CC	CC	CC	TT	TT	TT	CC	TT	TT	TT	CC	TT	TT	CC	TT	CC	CC	TT	TT	TT	CC	CC	TT	CC	CC	CC	CC	TT	CC	TT	TT	CC	CC	CC	CC
AX-95112632	2B	667663675	T/C	CC	CC	TT	TT	TT	TT	TT	TT	CC	TT	CC	TT	CC	TT	TT	TT	TT	TT	TT	CC	TT	TT	TT	TT	TT	TT	TT	CC	TT	TT	TT	TT	TT	TT	TT	TT	TT	TT	CC	TT	TT	TT	CC	TT	TT	TT
AX-95155520	2B	670842127	G/A	GG	GG	GG	GG	GG	GG	GG	GG	GG	GG	GG	GG	AA	GG	GG	GG	GG	GG	GG	GG	GG	AA	AA	GG	GG	GG	GG	GG	GG	GG	GG	GG	GG	GG	AA	GG	AA	GG	GG	GG	GG	GG	GG	AA	GG	GG
AX-95219673	2B	671741075	T/C	TT	TT	CC	CC	TT	TT	CC	TT	TT	TT	CC	TT	CC	TT	CC	CC	CC	TT	CC	CC	CC	CC	CC	CC	TT	CC	TT	TT	CC	CC	CC	TT	TT	CC	CC	TT	CC	TT	CC	TT	CC	CC	TT	CC	TT	TT
AX-95204501	2B	673708580	G/C	GG	GG	CC	CC	GG	GG	CC	GG	CC	GG	CC	GG	GG	GG	CC	CC	CC	GG	CC	CC	CC	CC	GG	CC	GG	CC	CC	GG	CC	CC	CC	GG	GG	CC	CC	GG	CC	GG	CC	GG	CC	CC	GG	GG	GG	GG
AX-94507002	2B	673982482	T/C	TT	TT	CC	CC	TT	TT	CC	TT	TT	TT	CC	TT	TT	TT	CC	CC	CC	TT	CC	CC	CC	TT	CC	CC	TT	CC	TT	TT	CC	CC	CC	TT	TT	CC	TT	TT	TT	TT	CC	TT	CC	CC	TT	TT	TT	TT
AX-94648660	2B	675352282	C/T	CC	CC	CC	CC	CC	TT	CC	TT	CC	TT	CC	TT	CC	TT	CC	CC	CC	TT	CC	CC	CC	CC	TT	CC	TT	CC	CC	CC	CC	CC	CC	TT	TT	CC	CC	TT	CC	TT	CC	TT	CC	CC	TT	CC	TT	TT
AX-94680266	2B	679885569	T/G	TT	TT	GG	GG	TT	TT	GG	TT	TT	TT	GG	TT	TT	TT	GG	GG	GG	TT	GG	GG	GG	TT	TT	GG	TT	GG	TT	TT	GG	GG	GG	TT	TT	GG	TT	TT	TT	TT	GG	TT	GG	GG	TT	TT	TT	TT
AX-95087628	2B	680198467	G/C	CC	CC	GG	GG	CC	GG	GG	GG	CC	GG	GG	GG	CC	GG	GG	GG	GG	GG	GG	GG	GG	CC	GG	GG	GG	GG	CC	CC	GG	GG	GG	GG	GG	GG	CC	GG	CC	GG	GG	GG	GG	GG	GG	CC	GG	GG
AX-94970086	2B	680522383	C/G	CC	CC	CC	CC	CC	GG	CC	GG	CC	GG	CC	GG	CC	GG	CC	CC	CC	GG	CC	CC	CC	CC	GG	CC	GG	CC	NN	CC	CC	CC	CC	GG	GG	CC	CC	GG	CC	GG	CC	GG	CC	CC	GG	CC	GG	GG
AX-94511729	2B	680754318	C/A	CC	CC	AA	AA	CC	CC	AA	CC	CC	CC	AA	CC	CC	CC	AA	AA	AA	CC	AA	AA	AA	CC	CC	AA	CC	AA	CC	NN	AA	AA	AA	CC	CC	AA	CC	CC	CC	CC	AA	CC	AA	AA	CC	CC	CC	CC
AX-94884026	2B	682039395	G/A	GG	GG	GG	GG	GG	AA	GG	AA	GG	AA	GG	AA	GG	AA	GG	GG	GG	AA	GG	GG	GG	GG	AA	GG	AA	GG	GG	GG	GG	GG	GG	AA	AA	GG	GG	AA	GG	AA	GG	AA	GG	GG	AA	GG	AA	AA
AX-95181223	2B	682178587	T/C	NN	TT	TT	TT	TT	CC	TT	TT	TT	TT	TT	TT	CC	TT	TT	CC	TT	TT	TT	TT	TT	TT	CC	CC	TT	CC	NN	CC	TT	TT	TT	CC	TT	TT	CC	CC	TT	TT	TT	CC	TT	TT	TT	CC	TT	TT
AX-94921162	2B	683047295	G/C	CC	CC	CC	CC	CC	GG	CC	GG	CC	GG	CC	GG	GG	GG	CC	CC	CC	GG	CC	CC	CC	GG	GG	CC	GG	CC	CC	CC	CC	CC	CC	GG	GG	CC	GG	GG	GG	NN	CC	GG	CC	CC	GG	GG	GG	GG
AX-95248635	2B	685267599	G/A	GG	GG	AA	AA	GG	GG	AA	GG	GG	GG	AA	GG	GG	GG	AA	AA	AA	GG	AA	AA	AA	GG	GG	AA	GG	AA	NN	GG	AA	AA	AA	GG	GG	AA	GG	GG	GG	GG	AA	GG	AA	AA	GG	GG	GG	GG
AX-94388689	2B	686243011	G/A	GG	GG	GG	GG	GG	AA	GG	GG	GG	GG	GG	GG	AA	GG	GG	AA	GG	GG	GG	GG	GG	GG	AA	AA	GG	AA	AA	GG	GG	GG	GG	AA	GG	GG	AA	AA	GG	GG	GG	AA	GG	GG	GG	AA	GG	GG
AX-94972784	2B	686818991	G/A	GG	GG	AA	GG	GG	GG	AA	AA	GG	GG	NN	GG	AA	GG	AA	AA	AA	GG	AA	GG	AA	GG	GG	GG	AA	NN	GG	GG	GG	AA	AA	AA	GG	AA	GG	AA	GG	AA	GG	AA	GG	AA	AA	GG	AA	AA
AX-95148347	2B	687472310	T/A	TT	TT	AA	AA	TT	TT	AA	TT	TT	TT	AA	TT	TT	TT	AA	AA	AA	TT	AA	AA	AA	TT	TT	AA	TT	AA	TT	TT	AA	AA	AA	TT	TT	AA	TT	TT	TT	TT	AA	TT	AA	AA	TT	TT	TT	TT
AX-94389884	2B	688240796	A/G	AA	AA	AA	GG	AA	GG	AA	AA	AA	GG	AA	GG	AA	GG	AA	AA	AA	GG	AA	GG	AA	GG	GG	GG	AA	AA	AA	GG	GG	AA	AA	AA	GG	AA	GG	AA	GG	AA	GG	AA	GG	AA	AA	GG	AA	AA
AX-94606504	2B	688431152	G/T	GG	GG	GG	GG	GG	TT	GG	TT	GG	TT	GG	TT	GG	TT	GG	GG	GG	TT	GG	GG	GG	GG	TT	GG	TT	GG	GG	GG	GG	GG	GG	TT	TT	GG	GG	TT	GG	TT	GG	TT	GG	GG	TT	GG	TT	TT
AX-94722735	2B	688459207	G/C	GG	GG	CC	GG	GG	GG	CC	GG	GG	GG	CC	GG	GG	GG	CC	CC	CC	GG	CC	GG	CC	GG	GG	GG	GG	CC	GG	GG	NN	CC	CC	GG	GG	CC	GG	GG	GG	GG	GG	GG	GG	CC	GG	GG	GG	GG
AX-95186649	2B	688462895	A/G	GG	GG	GG	GG	GG	AA	GG	AA	GG	AA	GG	AA	AA	AA	GG	GG	GG	AA	GG	GG	GG	AA	AA	GG	AA	GG	GG	GG	GG	GG	GG	AA	AA	GG	AA	AA	AA	AA	GG	AA	GG	GG	AA	AA	AA	AA
AX-94555084	2B	689485542	A/G	GG	GG	GG	GG	GG	AA	GG	AA	GG	AA	GG	AA	AA	AA	GG	GG	GG	AA	GG	GG	GG	AA	AA	GG	AA	GG	GG	GG	GG	GG	GG	AA	AA	GG	AA	AA	AA	AA	GG	AA	GG	GG	AA	AA	AA	AA
AX-94991562	2B	690033677	T/C	TT	TT	TT	TT	TT	CC	TT	TT	TT	CC	TT	CC	TT	CC	TT	TT	TT	CC	TT	NN	TT	CC	CC	TT	TT	TT	TT	TT	TT	TT	TT	TT	CC	TT	CC	TT	CC	NN	TT	TT	TT	TT	TT	CC	TT	TT
AX-95149329	2B	690210922	G/C	GG	GG	GG	GG	GG	GG	GG	GG	GG	GG	GG	GG	CC	GG	GG	GG	GG	GG	GG	GG	GG	CC	GG	GG	GG	GG	GG	GG	GG	GG	GG	GG	GG	GG	CC	GG	CC	GG	GG	GG	GG	GG	GG	CC	GG	GG
AX-95250040	2B	690217469	G/A	AA	AA	GG	GG	AA	GG	GG	GG	GG	GG	GG	GG	AA	GG	GG	GG	GG	GG	GG	GG	GG	AA	GG	GG	GG	GG	NN	AA	GG	GG	GG	GG	GG	GG	AA	GG	AA	GG	GG	GG	GG	GG	GG	AA	GG	GG
AX-94409063	2B	690218246	C/T	CC	CC	CC	TT	CC	TT	CC	CC	CC	TT	CC	TT	CC	TT	CC	CC	CC	TT	CC	TT	CC	CC	TT	TT	CC	CC	CC	CC	TT	CC	CC	CC	TT	CC	CC	CC	CC	CC	TT	CC	TT	CC	CC	CC	CC	CC
AX-94381628	2B	691055812	C/T	CC	CC	CC	CC	CC	TT	CC	TT	TT	TT	CC	TT	CC	TT	CC	CC	CC	TT	CC	CC	CC	CC	TT	CC	TT	CC	TT	CC	CC	CC	CC	TT	TT	CC	CC	TT	CC	TT	CC	TT	CC	CC	TT	CC	TT	TT
AX-95171145	2B	694051060	G/T	TT	GG	TT	TT	GG	GG	TT	GG	GG	GG	TT	GG	GG	GG	TT	TT	TT	GG	TT	TT	TT	GG	GG	TT	TT	TT	NN	TT	TT	TT	TT	GG	GG	TT	GG	GG	GG	GG	TT	GG	TT	TT	GG	GG	GG	GG
AX-95216756	2B	694266614	A/G	GG	AA	GG	GG	AA	NN	GG	AA	AA	AA	GG	AA	AA	AA	GG	GG	GG	AA	GG	GG	GG	AA	AA	GG	AA	GG	GG	GG	GG	GG	GG	NN	AA	GG	AA	AA	AA	AA	GG	AA	GG	GG	AA	AA	AA	AA
AX-95240646	2B	695379645	G/C	GG	GG	GG	CC	GG	GG	GG	GG	GG	CC	GG	GG	GG	CC	GG	GG	GG	GG	GG	CC	GG	CC	GG	CC	GG	GG	GG	GG	CC	GG	GG	GG	GG	GG	CC	GG	CC	GG	CC	GG	CC	GG	GG	GG	GG	GG
AX-94934089	2B	695689264	C/T	CC	CC	CC	CC	CC	TT	CC	TT	CC	TT	CC	TT	CC	TT	CC	CC	CC	TT	CC	CC	CC	CC	CC	CC	TT	CC	CC	CC	CC	CC	CC	TT	TT	CC	CC	CC	CC	CC	CC	CC	CC	CC	TT	CC	TT	TT
AX-94897258	2B	696356046	A/C	AA	CC	AA	AA	CC	CC	AA	CC	AA	AA	AA	CC	CC	AA	AA	AA	AA	CC	AA	AA	AA	AA	CC	AA	CC	AA	NN	AA	AA	AA	AA	CC	CC	AA	AA	CC	AA	CC	AA	CC	AA	AA	CC	CC	CC	CC
AX-95251085	2B	697546886	A/G	AA	GG	AA	AA	GG	AA	AA	AA	GG	AA	AA	AA	GG	AA	AA	AA	AA	AA	AA	AA	AA	GG	GG	AA	AA	AA	GG	AA	AA	AA	AA	AA	AA	AA	GG	GG	GG	GG	AA	GG	AA	AA	AA	GG	AA	AA
AX-95102360	2B	701763156	G/C	GG	GG	GG	GG	GG	CC	GG	CC	CC	CC	GG	CC	GG	CC	GG	GG	GG	CC	GG	GG	GG	GG	GG	GG	CC	GG	CC	GG	GG	GG	GG	CC	CC	GG	GG	GG	GG	GG	GG	GG	GG	GG	CC	GG	CC	CC
AX-95198383	2B	703976023	T/C	TT	TT	TT	TT	TT	TT	TT	TT	CC	TT	TT	TT	CC	TT	TT	TT	TT	TT	TT	TT	TT	CC	CC	TT	CC	TT	CC	TT	TT	TT	TT	TT	TT	TT	CC	CC	CC	CC	TT	CC	TT	TT	TT	CC	TT	TT
AX-94570110	2B	703977475	C/T	TT	CC	TT	TT	CC	CC	TT	CC	CC	CC	TT	CC	CC	CC	TT	TT	TT	CC	TT	TT	TT	CC	CC	TT	CC	TT	NN	TT	TT	TT	TT	CC	CC	TT	CC	CC	CC	CC	TT	CC	TT	TT	CC	CC	CC	CC
AX-94999286	2B	704129783	G/A	GG	GG	GG	AA	GG	GG	GG	GG	GG	AA	GG	GG	GG	AA	GG	GG	GG	GG	GG	GG	GG	GG	GG	GG	GG	GG	GG	GG	AA	GG	GG	GG	GG	GG	GG	GG	GG	AA	AA	GG	AA	GG	GG	GG	GG	GG
AX-95199082	2B	704729538	A/G	AA	AA	AA	AA	AA	AA	AA	AA	GG	AA	AA	AA	GG	AA	AA	AA	AA	AA	AA	AA	AA	GG	AA	AA	GG	AA	GG	AA	AA	AA	AA	AA	AA	AA	GG	GG	GG	GG	AA	GG	AA	AA	AA	GG	AA	AA
AX-95257567	2B	706295965	G/A	GG	AA	GG	GG	AA	AA	GG	AA	GG	AA	GG	AA	GG	AA	GG	GG	GG	AA	GG	GG	GG	GG	GG	GG	GG	GG	GG	GG	GG	GG	GG	AA	AA	GG	GG	GG	GG	GG	GG	GG	GG	GG	AA	GG	AA	AA
AX-94916940	2B	706418420	A/T	TT	AA	TT	TT	AA	AA	TT	AA	AA	AA	TT	AA	AA	AA	TT	TT	TT	AA	TT	TT	TT	AA	AA	TT	AA	TT	TT	TT	TT	TT	TT	AA	AA	TT	AA	AA	AA	AA	TT	AA	TT	TT	AA	AA	AA	AA
AX-94815821	2B	707982742	C/A	AA	AA	AA	AA	AA	CC	AA	CC	CC	CC	AA	CC	CC	CC	AA	AA	AA	CC	AA	AA	AA	CC	CC	AA	CC	AA	CC	NN	AA	AA	AA	CC	CC	AA	CC	CC	CC	CC	AA	CC	AA	AA	CC	CC	NN	CC
AX-95653021	2B	708863086	G/A	GG	AA	GG	GG	AA	AA	GG	AA	AA	AA	GG	AA	AA	AA	GG	GG	GG	AA	GG	GG	GG	GG	AA	GG	GG	GG	AA	GG	GG	GG	GG	GG	AA	GG	GG	GG	GG	GG	GG	GG	GG	GG	AA	GG	AA	AA
AX-94833805	2B	710988096	T/C	CC	CC	CC	CC	CC	TT	CC	TT	CC	TT	CC	TT	TT	TT	CC	CC	CC	TT	CC	CC	CC	TT	TT	CC	TT	CC	CC	CC	CC	CC	CC	TT	TT	CC	TT	TT	TT	TT	CC	TT	CC	CC	TT	TT	TT	TT
AX-94721968	2B	712600301	C/T	CC	CC	CC	CC	CC	TT	CC	TT	TT	TT	CC	TT	CC	TT	CC	CC	CC	TT	CC	CC	CC	CC	TT	CC	TT	CC	TT	CC	CC	CC	CC	TT	TT	CC	CC	CC	CC	CC	CC	CC	CC	CC	TT	CC	TT	TT
AX-94467943	2B	712602123	G/A	AA	GG	AA	AA	GG	GG	AA	GG	AA	GG	AA	GG	GG	GG	AA	AA	AA	GG	AA	AA	AA	GG	GG	AA	GG	AA	AA	AA	AA	AA	AA	GG	GG	AA	GG	GG	GG	GG	AA	GG	AA	AA	GG	GG	GG	GG
AX-94738422	2B	713791102	C/T	CC	TT	CC	CC	TT	CC	CC	CC	CC	CC	CC	CC	TT	CC	CC	CC	CC	CC	CC	CC	CC	TT	CC	CC	CC	CC	CC	CC	CC	CC	CC	CC	CC	CC	TT	TT	TT	TT	CC	TT	CC	CC	CC	TT	CC	CC
AX-95021824	2B	714499077	C/A	CC	CC	CC	CC	CC	AA	CC	AA	AA	AA	CC	AA	CC	AA	CC	CC	CC	AA	CC	CC	CC	CC	AA	CC	AA	CC	AA	CC	CC	CC	CC	AA	AA	CC	CC	CC	CC	CC	CC	CC	CC	CC	AA	CC	AA	AA
AX-94533854	2B	715310462	T/A	TT	TT	TT	TT	TT	AA	TT	AA	AA	AA	TT	AA	TT	AA	TT	TT	TT	AA	TT	TT	TT	TT	AA	TT	AA	TT	AA	TT	TT	TT	TT	AA	AA	TT	TT	TT	TT	TT	TT	TT	TT	TT	AA	TT	AA	AA
AX-94787485	2B	716552683	G/C	GG	CC	GG	GG	CC	CC	GG	CC	GG	CC	GG	CC	GG	CC	GG	GG	GG	CC	GG	GG	GG	GG	GG	GG	GG	GG	GG	GG	GG	GG	GG	CC	CC	GG	GG	GG	GG	GG	GG	GG	GG	GG	CC	GG	CC	CC
AX-94857923	2B	718967279	C/G	GG	CC	GG	GG	CC	CC	GG	CC	CC	CC	GG	CC	CC	CC	GG	GG	GG	CC	GG	GG	GG	CC	CC	GG	CC	GG	NN	GG	GG	GG	GG	CC	CC	GG	CC	CC	CC	CC	GG	CC	GG	GG	CC	CC	CC	CC
AX-94645156	2B	719473908	C/G	GG	CC	GG	GG	CC	CC	GG	CC	CC	CC	GG	CC	CC	CC	GG	GG	GG	CC	GG	GG	GG	CC	CC	GG	CC	GG	NN	GG	GG	GG	GG	CC	CC	GG	CC	CC	CC	CC	GG	CC	GG	GG	CC	CC	CC	CC
AX-95168209	2B	723302490	A/G	GG	NN	GG	GG	NN	AA	GG	AA	NN	AA	GG	AA	AA	AA	GG	GG	GG	AA	GG	GG	GG	AA	GG	GG	AA	GG	GG	GG	GG	GG	GG	AA	AA	GG	AA	AA	AA	AA	GG	AA	GG	GG	AA	AA	AA	AA
AX-94461492	2B	725110973	A/G	GG	AA	GG	GG	AA	AA	GG	AA	AA	AA	GG	AA	AA	AA	GG	GG	GG	AA	GG	GG	GG	AA	AA	GG	AA	GG	GG	GG	GG	GG	GG	AA	AA	GG	AA	AA	AA	AA	GG	AA	GG	GG	AA	AA	AA	AA
AX-94408415	2B	728397921	T/C	CC	CC	CC	CC	CC	TT	CC	TT	CC	TT	CC	TT	TT	TT	CC	CC	CC	TT	CC	CC	CC	TT	CC	CC	TT	CC	CC	CC	CC	CC	CC	TT	TT	CC	TT	TT	TT	TT	CC	TT	CC	CC	TT	TT	TT	TT
AX-94945394	2B	729517332	G/A	GG	GG	GG	GG	GG	GG	GG	GG	GG	GG	GG	GG	AA	GG	GG	GG	GG	GG	GG	AA	GG	AA	GG	AA	GG	GG	GG	GG	GG	GG	GG	GG	GG	GG	AA	GG	AA	GG	GG	GG	GG	GG	GG	AA	GG	GG
AX-95248718	2B	731481860	G/T	TT	TT	TT	TT	TT	GG	TT	GG	TT	GG	TT	GG	GG	GG	TT	TT	TT	GG	TT	TT	TT	GG	TT	TT	GG	TT	TT	TT	TT	TT	TT	GG	GG	TT	GG	GG	GG	GG	TT	GG	TT	TT	GG	GG	GG	GG
AX-94883421	2B	731894289	T/C	CC	TT	CC	CC	TT	TT	CC	TT	CC	TT	CC	TT	TT	TT	CC	CC	CC	TT	CC	CC	CC	TT	CC	CC	TT	CC	CC	CC	CC	CC	CC	TT	TT	CC	TT	NN	TT	TT	CC	TT	CC	CC	TT	TT	TT	TT
AX-95171076	2B	732607762	G/A	AA	AA	AA	AA	AA	GG	AA	GG	AA	GG	AA	GG	GG	GG	AA	AA	AA	GG	AA	AA	AA	GG	GG	AA	GG	AA	AA	AA	AA	AA	AA	GG	GG	AA	GG	GG	GG	GG	AA	GG	AA	AA	GG	GG	GG	GG
AX-94601908	2B	735521004	C/T	TT	CC	TT	TT	CC	CC	TT	CC	CC	CC	TT	CC	CC	CC	TT	TT	TT	CC	TT	TT	TT	CC	CC	TT	CC	TT	NN	TT	TT	TT	TT	CC	CC	TT	CC	CC	CC	CC	TT	CC	TT	TT	CC	CC	CC	CC
AX-94577588	2B	741247646	C/G	GG	CC	GG	GG	CC	CC	GG	CC	CC	CC	GG	CC	CC	CC	GG	GG	GG	CC	GG	GG	GG	CC	CC	GG	CC	GG	GG	GG	GG	GG	GG	CC	CC	GG	CC	CC	CC	CC	GG	CC	GG	GG	CC	CC	CC	CC
AX-94606432	2B	743316677	T/C	CC	TT	CC	CC	TT	TT	CC	TT	TT	TT	CC	TT	TT	TT	CC	CC	CC	TT	CC	CC	CC	TT	TT	CC	TT	CC	NN	NN	CC	CC	CC	TT	TT	CC	TT	TT	TT	TT	CC	TT	CC	CC	TT	TT	TT	TT
AX-95255981	2B	744691066	T/C	TT	CC	CC	TT	CC	CC	TT	TT	CC	CC	CC	TT	TT	TT	TT	TT	TT	TT	TT	TT	TT	TT	TT	TT	TT	TT	TT	TT	TT	TT	TT	CC	CC	TT	TT	TT	TT	CC	CC	TT	CC	CC	CC	CC	TT	CC
AX-95652717	2B	745719247	G/A	GG	AA	GG	GG	AA	AA	GG	AA	AA	AA	GG	AA	AA	AA	GG	GG	GG	GG	GG	GG	GG	GG	AA	GG	GG	GG	NN	GG	GG	GG	GG	GG	AA	GG	GG	GG	GG	GG	GG	GG	GG	GG	AA	GG	AA	GG
AX-95165387	2B	747821320	A/C	AA	CC	AA	AA	CC	CC	AA	CC	CC	CC	AA	CC	CC	CC	AA	AA	AA	AA	AA	AA	AA	AA	CC	AA	AA	AA	AA	AA	AA	AA	AA	AA	CC	AA	AA	AA	AA	AA	AA	AA	AA	AA	CC	AA	CC	AA
AX-94944028	2B	748425336	C/T	CC	CC	CC	CC	CC	TT	CC	TT	CC	TT	CC	TT	CC	TT	CC	CC	CC	CC	CC	CC	CC	CC	TT	CC	CC	CC	TT	CC	CC	CC	CC	CC	TT	CC	CC	CC	CC	CC	CC	CC	CC	CC	TT	CC	TT	CC
AX-95113411	2B	749972411	C/T	CC	TT	CC	CC	TT	TT	CC	TT	TT	TT	CC	TT	TT	TT	CC	CC	CC	TT	CC	CC	CC	CC	TT	CC	CC	CC	TT	CC	CC	CC	CC	CC	TT	CC	CC	CC	CC	CC	CC	CC	CC	CC	TT	CC	TT	TT
AX-94817182	2B	751180888	A/G	GG	GG	AA	AA	AA	AA	GG	AA	GG	AA	AA	GG	AA	AA	AA	AA	AA	AA	AA	AA	AA	AA	AA	AA	AA	AA	GG	GG	AA	AA	AA	AA	GG	GG	AA	AA	AA	AA	AA	AA	GG	GG	AA	AA	AA	AA
AX-95160331	2B	762381249	T/C	CC	CC	TT	TT	TT	TT	CC	TT	CC	TT	CC	TT	CC	TT	TT	TT	TT	TT	TT	TT	TT	TT	TT	TT	TT	TT	TT	CC	TT	TT	TT	TT	TT	CC	TT	TT	TT	TT	CC	TT	TT	TT	CC	TT	TT	TT
AX-95191816	2B	763474845	G/A	GG	GG	GG	GG	GG	AA	GG	GG	GG	GG	GG	GG	AA	GG	GG	AA	GG	GG	GG	GG	GG	GG	AA	AA	GG	AA	GG	GG	GG	GG	GG	AA	GG	GG	AA	AA	GG	GG	GG	AA	GG	GG	GG	AA	GG	GG
AX-94799403	2B	765278479	C/T	CC	CC	CC	CC	CC	TT	CC	CC	CC	CC	CC	CC	TT	CC	CC	TT	CC	CC	CC	CC	CC	CC	TT	TT	CC	TT	TT	CC	CC	CC	CC	TT	CC	CC	TT	TT	CC	CC	CC	TT	CC	CC	CC	TT	CC	CC
AX-95112013	2B	767182211	C/G	CC	CC	CC	CC	CC	CC	CC	CC	CC	CC	CC	CC	GG	CC	CC	GG	CC	CC	CC	CC	CC	CC	CC	GG	CC	GG	CC	CC	CC	CC	CC	GG	CC	CC	GG	GG	CC	CC	CC	GG	CC	CC	CC	GG	CC	CC
AX-94770839	2B	770035391	A/G	AA	AA	AA	AA	AA	GG	AA	AA	NN	AA	AA	AA	GG	AA	AA	GG	AA	AA	AA	AA	AA	AA	GG	GG	AA	GG	GG	AA	AA	AA	AA	GG	AA	AA	GG	GG	AA	AA	AA	GG	AA	AA	AA	GG	AA	AA
AX-94967288	2B	772818726	C/A	AA	AA	CC	AA	AA	CC	CC	CC	CC	CC	CC	AA	AA	CC	AA	AA	AA	CC	AA	AA	AA	AA	CC	AA	CC	AA	CC	AA	CC	CC	AA	CC	CC	CC	AA	CC	CC	CC	AA	CC	CC	CC	CC	AA	CC	CC
AX-94481202	2B	773349541	A/G	AA	AA	AA	AA	AA	GG	AA	AA	AA	AA	AA	AA	GG	AA	AA	GG	AA	AA	AA	AA	AA	AA	GG	GG	AA	GG	GG	NN	AA	AA	AA	GG	AA	AA	GG	GG	AA	AA	AA	GG	AA	AA	AA	GG	AA	AA
AX-94437015	2B	774656461	T/C	TT	TT	TT	TT	TT	TT	TT	TT	TT	TT	TT	TT	CC	TT	TT	CC	TT	TT	TT	TT	TT	TT	TT	CC	TT	CC	TT	TT	TT	TT	TT	CC	TT	TT	CC	CC	TT	TT	TT	CC	TT	TT	TT	CC	TT	TT
AX-94585596	2B	776410885	C/T	CC	TT	CC	CC	CC	TT	CC	TT	TT	TT	TT	CC	TT	TT	TT	TT	CC	CC	TT	CC	CC	CC	TT	TT	CC	TT	TT	CC	TT	CC	CC	TT	CC	CC	TT	TT	TT	CC	TT	TT	CC	CC	TT	TT	CC	CC
AX-94509892	2B	777301766	C/T	CC	CC	CC	CC	CC	TT	CC	TT	CC	TT	CC	CC	CC	TT	TT	CC	CC	CC	TT	CC	CC	CC	TT	CC	CC	CC	CC	CC	CC	CC	CC	CC	CC	CC	CC	CC	TT	CC	CC	CC	CC	CC	CC	CC	CC	CC
AX-94382830	2B	780872980	C/A	CC	AA	AA	CC	CC	CC	CC	CC	AA	AA	AA	CC	AA	CC	CC	AA	CC	CC	CC	CC	CC	CC	AA	AA	CC	AA	AA	CC	CC	AA	CC	AA	CC	CC	AA	AA	CC	CC	AA	AA	CC	CC	AA	AA	CC	CC
AX-94702510	2B	781324284	C/A	CC	AA	CC	CC	CC	AA	CC	AA	AA	AA	AA	CC	AA	AA	AA	AA	CC	CC	AA	CC	CC	CC	AA	AA	CC	AA	AA	CC	AA	CC	CC	AA	CC	CC	AA	AA	AA	CC	AA	AA	CC	CC	AA	AA	CC	CC
AX-94567292	2B	781777572	T/G	TT	TT	GG	TT	TT	GG	TT	GG	GG	GG	GG	TT	GG	GG	GG	GG	TT	TT	GG	TT	TT	TT	GG	GG	TT	GG	GG	TT	GG	GG	TT	GG	TT	TT	GG	GG	GG	TT	TT	GG	TT	TT	TT	GG	TT	TT
AX-94439923	2B	783942273	C/T	CC	TT	TT	CC	CC	CC	CC	CC	TT	CC	TT	CC	CC	CC	CC	CC	CC	CC	CC	CC	CC	CC	CC	CC	CC	CC	TT	CC	TT	TT	CC	CC	CC	CC	CC	CC	CC	CC	TT	CC	CC	CC	TT	CC	CC	CC
AX-94414289	2B	786036794	G/A	GG	AA	GG	GG	GG	AA	GG	GG	AA	GG	GG	GG	AA	GG	GG	AA	GG	GG	GG	GG	GG	GG	AA	AA	GG	AA	AA	GG	GG	GG	GG	AA	GG	GG	AA	AA	AA	GG	AA	AA	GG	GG	AA	AA	GG	GG
AX-94386402	2B	786103194	G/A	GG	AA	GG	GG	GG	AA	GG	GG	AA	GG	GG	GG	GG	GG	GG	GG	GG	GG	GG	GG	GG	GG	AA	GG	GG	GG	AA	GG	GG	GG	GG	GG	GG	GG	GG	GG	GG	GG	AA	GG	GG	GG	AA	GG	GG	GG
AX-94539413	2B	787952503	C/G	CC	CC	GG	CC	CC	CC	GG	CC	GG	CC	GG	CC	CC	CC	CC	CC	CC	CC	CC	CC	CC	CC	CC	CC	CC	CC	GG	CC	GG	GG	CC	CC	CC	CC	CC	CC	CC	CC	CC	CC	CC	GG	CC	CC	CC	CC
AX-94641018	2B	788520779	T/C	TT	CC	CC	TT	TT	TT	CC	TT	CC	TT	CC	TT	TT	TT	TT	TT	TT	TT	TT	TT	TT	TT	TT	TT	TT	TT	CC	TT	CC	CC	TT	TT	TT	TT	TT	TT	TT	TT	CC	TT	TT	CC	CC	TT	TT	TT
AX-95633254	2B	789605604	A/G	AA	AA	AA	AA	AA	GG	AA	AA	AA	AA	AA	AA	GG	AA	AA	GG	AA	AA	AA	AA	AA	AA	AA	GG	AA	GG	AA	AA	GG	AA	AA	GG	AA	AA	GG	GG	GG	AA	AA	GG	AA	AA	AA	GG	AA	AA
AX-94771153	2B	789669759	A/C	AA	NN	AA	AA	AA	CC	AA	AA	CC	AA	AA	AA	CC	AA	AA	CC	AA	AA	AA	AA	AA	AA	AA	CC	AA	CC	CC	AA	CC	AA	AA	CC	AA	AA	CC	CC	CC	AA	CC	CC	AA	AA	CC	CC	AA	AA
AX-94824063	2B	790624113	A/T	AA	TT	TT	AA	AA	TT	TT	TT	TT	AA	TT	AA	TT	AA	AA	TT	AA	TT	AA	TT	AA	AA	AA	TT	AA	TT	TT	AA	TT	TT	AA	TT	AA	AA	TT	TT	TT	AA	TT	TT	AA	TT	TT	TT	AA	AA
AX-94905821	2B	791479430	C/T	CC	CC	TT	CC	CC	TT	TT	CC	TT	CC	TT	CC	TT	CC	CC	TT	CC	TT	CC	TT	CC	CC	CC	TT	CC	TT	TT	CC	CC	TT	CC	TT	CC	CC	TT	TT	TT	CC	CC	TT	CC	TT	CC	TT	CC	CC
AX-94433535	2B	791479492	C/T	CC	TT	TT	CC	CC	TT	TT	CC	TT	CC	TT	CC	TT	CC	CC	TT	CC	TT	CC	TT	CC	CC	CC	TT	CC	TT	TT	CC	TT	TT	CC	TT	CC	CC	TT	TT	TT	CC	TT	TT	CC	TT	TT	TT	CC	CC
AX-94892052	2B	792877551	A/G	AA	AA	AA	AA	AA	GG	AA	AA	AA	AA	AA	AA	AA	AA	AA	AA	AA	AA	AA	AA	AA	AA	AA	AA	AA	AA	AA	AA	AA	AA	AA	AA	GG	AA	AA	AA	AA	AA	AA	AA	AA	AA	AA	AA	AA	AA
AX-95087261	2B	793033956	G/T	GG	GG	GG	GG	GG	TT	GG	TT	GG	GG	GG	GG	TT	GG	GG	TT	GG	TT	GG	TT	GG	GG	GG	TT	GG	TT	NN	GG	NN	GG	GG	TT	TT	GG	TT	TT	TT	GG	GG	TT	GG	GG	GG	TT	GG	GG
AX-94415912	2B	793440342	G/A	GG	AA	GG	GG	GG	GG	GG	GG	AA	GG	GG	GG	AA	GG	GG	AA	GG	AA	GG	AA	GG	GG	GG	AA	GG	AA	AA	GG	GG	GG	GG	AA	GG	GG	AA	AA	AA	GG	AA	AA	GG	GG	AA	AA	GG	GG
AX-94431764	2B	793920861	T/C	TT	TT	TT	TT	TT	CC	TT	TT	TT	TT	TT	TT	CC	TT	TT	CC	TT	TT	TT	TT	TT	TT	CC	CC	TT	CC	CC	TT	TT	TT	TT	CC	TT	TT	CC	CC	TT	TT	TT	CC	TT	TT	TT	CC	TT	TT
AX-94629483	2B	794048719	G/A	GG	GG	GG	GG	GG	AA	GG	GG	GG	GG	GG	GG	GG	GG	GG	AA	GG	AA	GG	AA	GG	AA	GG	AA	GG	AA	GG	GG	GG	GG	GG	AA	AA	GG	AA	GG	AA	GG	AA	AA	GG	GG	GG	GG	AA	AA
AX-95162495	2B	794501014	G/A	AA	AA	GG	GG	GG	GG	GG	AA	AA	AA	GG	GG	AA	AA	AA	GG	GG	AA	AA	GG	GG	GG	AA	GG	AA	GG	AA	GG	AA	GG	AA	GG	GG	GG	GG	GG	GG	GG	AA	GG	GG	GG	AA	GG	AA	AA
AX-94588733	2B	795045953	C/T	CC	TT	CC	CC	TT	CC	CC	CC	TT	CC	TT	CC	CC	CC	CC	NN	CC	CC	CC	TT	CC	TT	NN	NN	TT	TT	TT	CC	CC	TT	CC	NN	CC	CC	NN	CC	TT	TT	CC	NN	CC	NN	TT	CC	CC	CC
AX-94865494	2B	795064493	G/C	CC	GG	GG	GG	NN	CC	GG	GG	GG	GG	NN	CC	GG	GG	CC	GG	CC	CC	CC	GG	GG	CC	CC	GG	GG	GG	GG	GG	CC	GG	GG	GG	CC	CC	GG	GG	GG	GG	GG	NN	CC	GG	GG	GG	GG	CC
AX-95017900	2B	795064852	G/C	GG	GG	GG	GG	GG	GG	GG	GG	GG	GG	GG	GG	GG	GG	CC	GG	GG	CC	GG	GG	GG	GG	NN	GG	GG	GG	GG	GG	CC	GG	GG	GG	GG	GG	GG	GG	GG	CC	GG	CC	GG	GG	GG	GG	GG	GG
AX-95121230	2B	795066708	C/G	CC	GG	CC	CC	CC	CC	GG	CC	GG	CC	CC	CC	CC	CC	CC	CC	CC	CC	CC	CC	CC	CC	GG	CC	CC	CC	GG	CC	CC	GG	CC	CC	CC	CC	CC	CC	CC	GG	CC	CC	CC	GG	GG	CC	CC	CC
AX-95232143	2B	795280704	C/T	CC	TT	TT	CC	NN	CC	TT	CC	TT	CC	TT	CC	TT	CC	CC	CC	CC	CC	CC	CC	CC	CC	CC	CC	CC	CC	TT	CC	CC	TT	CC	CC	CC	CC	CC	CC	CC	CC	TT	CC	CC	TT	TT	CC	CC	CC
AX-94401309	2B	796046525	G/A	GG	AA	GG	GG	AA	GG	GG	GG	AA	GG	AA	GG	GG	GG	GG	AA	GG	GG	GG	AA	GG	AA	AA	AA	AA	AA	NN	GG	AA	AA	GG	AA	GG	GG	AA	GG	AA	AA	GG	AA	GG	AA	AA	GG	GG	GG
AX-94602446	2B	796804262	A/G	NN	AA	AA	AA	GG	AA	AA	AA	AA	AA	GG	AA	GG	AA	GG	AA	AA	GG	GG	AA	AA	AA	GG	AA	AA	AA	AA	AA	GG	AA	AA	AA	AA	AA	AA	AA	AA	GG	AA	GG	AA	AA	AA	AA	AA	AA
AX-95260667	2B	796805402	A/G	AA	AA	AA	GG	AA	GG	AA	AA	AA	AA	AA	AA	AA	AA	AA	AA	GG	AA	GG	AA	GG	GG	AA	AA	AA	AA	AA	GG	GG	AA	GG	AA	GG	GG	AA	AA	AA	AA	AA	AA	GG	AA	AA	AA	GG	GG
AX-95107926	2B	798135109	A/G	AA	GG	GG	AA	AA	AA	GG	AA	GG	AA	GG	AA	GG	AA	AA	GG	AA	NN	AA	AA	AA	AA	AA	GG	AA	GG	GG	AA	AA	GG	AA	GG	AA	AA	GG	GG	GG	AA	GG	GG	AA	GG	GG	GG	AA	AA
AX-95110001	2B	798138031	C/G	CC	GG	CC	CC	CC	CC	CC	CC	GG	CC	CC	CC	GG	CC	CC	GG	CC	CC	CC	CC	CC	CC	CC	GG	CC	GG	GG	CC	CC	CC	CC	GG	CC	CC	GG	GG	GG	CC	GG	GG	CC	CC	GG	GG	CC	CC
AX-94670978	2B	798379229	C/T	TT	CC	TT	CC	TT	TT	TT	TT	TT	TT	TT	TT	CC	TT	TT	CC	CC	CC	CC	CC	CC	CC	TT	CC	CC	CC	TT	TT	TT	CC	CC	CC	TT	TT	CC	CC	CC	CC	TT	CC	TT	TT	TT	CC	CC	CC
AX-95234877	2B	798725046	T/C	TT	TT	TT	TT	TT	TT	TT	TT	TT	TT	TT	TT	CC	TT	TT	TT	TT	CC	TT	CC	TT	CC	TT	TT	TT	TT	TT	TT	TT	TT	TT	TT	TT	TT	CC	TT	TT	TT	TT	TT	TT	TT	TT	CC	TT	CC
AX-94838332	2B	799120395	T/G	TT	TT	TT	TT	TT	TT	TT	TT	TT	TT	GG	TT	TT	TT	TT	TT	TT	TT	TT	GG	TT	GG	TT	GG	TT	GG	TT	TT	TT	GG	TT	TT	TT	TT	GG	GG	TT	GG	TT	GG	TT	TT	TT	GG	TT	TT
AX-94681123	2B	799290580	C/G	CC	GG	CC	CC	CC	CC	CC	CC	GG	CC	CC	CC	CC	CC	CC	CC	CC	GG	CC	GG	CC	CC	CC	CC	CC	CC	GG	CC	CC	CC	CC	CC	CC	CC	CC	CC	CC	CC	GG	CC	CC	CC	GG	CC	CC	CC
AX-94929455	2B	799576262	A/C	AA	AA	AA	AA	AA	AA	AA	AA	AA	AA	AA	AA	CC	AA	AA	CC	AA	AA	AA	AA	AA	AA	AA	CC	AA	CC	AA	AA	AA	AA	AA	CC	AA	AA	CC	CC	CC	AA	AA	CC	AA	AA	AA	CC	AA	AA
AX-95137846	2B	799969231	C/G	CC	CC	CC	CC	CC	CC	CC	GG	CC	CC	CC	CC	NN	CC	CC	GG	CC	CC	CC	CC	CC	CC	CC	GG	CC	GG	CC	CC	GG	CC	CC	GG	CC	CC	NN	CC	GG	GG	CC	GG	CC	CC	CC	CC	CC	CC
AX-94456940	2B	800968404	C/T	TT	CC	CC	TT	TT	CC	CC	CC	CC	TT	CC	TT	CC	TT	TT	CC	TT	CC	TT	CC	TT	TT	TT	CC	TT	CC	CC	TT	TT	CC	TT	CC	CC	TT	CC	CC	CC	CC	CC	CC	TT	CC	CC	CC	TT	TT
AX-94609530	2B	801163676	G/A	AA	AA	GG	AA	GG	AA	GG	GG	AA	GG	GG	GG	GG	GG	GG	GG	AA	GG	GG	GG	AA	AA	GG	GG	GG	GG	AA	GG	AA	GG	GG	GG	AA	GG	GG	GG	GG	GG	AA	GG	AA	GG	AA	GG	GG	GG
AX-95023231	2B	801217556	T/G	GG	TT	TT	GG	TT	TT	TT	TT	TT	TT	TT	TT	TT	TT	TT	TT	GG	TT	TT	TT	GG	GG	TT	TT	TT	TT	TT	TT	GG	TT	TT	TT	TT	TT	TT	TT	TT	TT	TT	TT	GG	TT	TT	TT	TT	TT
AX-94678995	2B	801218717	C/T	CC	CC	CC	CC	TT	CC	CC	TT	CC	TT	CC	TT	CC	TT	TT	CC	CC	TT	TT	TT	CC	CC	TT	CC	TT	CC	CC	TT	CC	CC	TT	CC	CC	TT	CC	CC	CC	CC	CC	CC	CC	CC	CC	CC	TT	TT
AX-94433091	2D	279831	G/A	AA	GG	AA	GG	AA	GG	AA	GG	GG	GG	GG	GG	GG	GG	AA	AA	GG	AA	AA	GG	AA	GG	GG	GG	AA	AA	GG	GG	GG	AA	AA	AA	GG	AA	GG	GG	GG	GG	AA	AA	GG	AA	GG	GG	AA	AA
AX-95146929	2D	1609296	A/G	GG	GG	GG	AA	AA	AA	AA	AA	GG	AA	GG	AA	GG	AA	AA	GG	AA	AA	AA	GG	AA	GG	AA	AA	AA	GG	AA	GG	AA	GG	AA	GG	AA	AA	GG	GG	GG	GG	GG	GG	AA	AA	GG	GG	AA	AA
AX-94533747	2D	2048394	G/A	GG	AA	GG	GG	GG	GG	GG	GG	AA	GG	GG	GG	GG	AA	GG	GG	GG	GG	GG	GG	GG	GG	GG	GG	GG	GG	GG	GG	GG	GG	GG	GG	GG	GG	GG	GG	GG	GG	GG	GG	GG	GG	GG	GG	GG	GG
AX-95256064	2D	2470280	G/A	GG	AA	AA	GG	GG	GG	GG	AA	GG	GG	AA	GG	GG	AA	AA	AA	GG	GG	AA	GG	GG	AA	GG	GG	GG	AA	GG	NN	AA	AA	GG	GG	GG	GG	AA	AA	AA	GG	AA	AA	GG	AA	AA	GG	AA	GG
AX-94724239	2D	9346332	A/G	AA	AA	AA	GG	AA	GG	AA	AA	AA	GG	AA	AA	AA	AA	AA	AA	AA	GG	AA	AA	AA	AA	AA	AA	AA	AA	AA	AA	AA	AA	AA	GG	GG	AA	AA	AA	AA	AA	AA	AA	GG	AA	AA	GG	AA	GG
AX-95207887	2D	9372517	T/C	TT	TT	TT	TT	TT	TT	TT	TT	TT	TT	TT	TT	TT	TT	TT	TT	TT	TT	TT	TT	TT	TT	TT	TT	TT	TT	TT	TT	TT	TT	TT	TT	TT	TT	TT	TT	TT	CC	TT	TT	TT	TT	TT	TT	TT	TT
AX-94406090	2D	9393867	C/A	CC	AA	CC	CC	CC	NN	CC	CC	CC	CC	CC	CC	AA	CC	CC	AA	CC	AA	CC	AA	CC	AA	CC	AA	CC	AA	CC	CC	NN	AA	CC	NN	CC	CC	AA	AA	AA	NN	CC	AA	CC	CC	CC	AA	CC	CC
AX-94794029	2D	10722684	C/T	TT	TT	CC	CC	TT	CC	TT	CC	TT	CC	TT	CC	TT	CC	CC	CC	CC	CC	CC	CC	CC	CC	CC	CC	CC	CC	TT	TT	CC	CC	CC	CC	CC	TT	CC	CC	CC	CC	TT	CC	CC	CC	TT	CC	CC	CC
AX-95131433	2D	11038258	G/A	AA	GG	AA	GG	AA	GG	AA	GG	GG	GG	GG	GG	GG	GG	AA	AA	GG	AA	AA	GG	AA	GG	GG	GG	GG	AA	GG	NN	GG	AA	AA	AA	GG	AA	GG	GG	GG	GG	AA	AA	GG	AA	GG	GG	AA	AA
AX-94478443	2D	11776890	A/C	AA	CC	AA	AA	AA	AA	AA	CC	AA	AA	CC	AA	CC	CC	AA	AA	AA	AA	AA	AA	AA	AA	AA	AA	AA	AA	AA	CC	AA	AA	AA	AA	AA	AA	AA	AA	CC	CC	AA	AA	AA	AA	CC	AA	AA	AA
AX-94441003	2D	11841538	G/A	AA	AA	AA	GG	AA	GG	AA	AA	GG	GG	AA	GG	AA	AA	AA	GG	GG	GG	AA	GG	GG	GG	GG	GG	GG	GG	AA	AA	GG	GG	GG	GG	GG	AA	GG	GG	AA	AA	AA	GG	GG	AA	AA	GG	GG	GG
AX-94871270	2D	11856198	A/G	GG	GG	GG	AA	GG	AA	GG	GG	AA	AA	GG	AA	GG	GG	GG	AA	AA	AA	GG	AA	AA	AA	AA	AA	AA	AA	AA	GG	AA	AA	AA	AA	AA	GG	AA	AA	GG	GG	GG	AA	AA	GG	GG	AA	AA	AA
AX-94900904	2D	12387776	T/C	TT	TT	TT	CC	TT	CC	TT	TT	TT	NN	TT	TT	TT	TT	TT	CC	CC	CC	TT	CC	CC	CC	CC	CC	CC	CC	CC	TT	CC	CC	CC	CC	TT	TT	CC	CC	TT	TT	TT	CC	TT	TT	TT	CC	CC	CC
AX-94506417	2D	12977997	A/G	AA	AA	GG	AA	AA	AA	AA	GG	AA	AA	AA	AA	AA	GG	GG	AA	AA	AA	GG	AA	AA	AA	AA	AA	AA	AA	AA	AA	AA	AA	AA	AA	AA	AA	AA	AA	GG	GG	AA	AA	AA	GG	AA	AA	AA	AA
AX-94420614	2D	13678715	G/T	GG	GG	TT	GG	GG	GG	GG	GG	GG	GG	GG	GG	GG	GG	TT	GG	GG	GG	GG	GG	GG	GG	GG	GG	GG	GG	GG	GG	GG	GG	GG	GG	GG	GG	GG	GG	GG	TT	GG	GG	GG	TT	GG	GG	GG	GG
AX-94471646	2D	13929712	G/A	GG	GG	GG	GG	GG	GG	GG	GG	GG	GG	GG	GG	GG	GG	GG	AA	GG	AA	AA	GG	GG	GG	GG	GG	GG	AA	GG	GG	GG	AA	AA	AA	GG	GG	GG	GG	GG	GG	GG	AA	GG	GG	GG	GG	AA	AA
AX-95257885	2D	13989187	C/T	TT	CC	TT	CC	TT	CC	TT	CC	CC	CC	CC	CC	CC	CC	TT	TT	CC	TT	TT	CC	TT	CC	CC	CC	CC	TT	CC	CC	TT	TT	TT	TT	CC	TT	CC	CC	CC	TT	TT	TT	CC	TT	CC	CC	TT	TT
AX-95191748	2D	14397982	C/T	TT	TT	TT	CC	TT	CC	TT	CC	TT	CC	TT	CC	TT	CC	TT	TT	CC	CC	CC	CC	CC	CC	CC	CC	CC	CC	NN	TT	TT	CC	CC	CC	CC	TT	CC	CC	CC	TT	TT	CC	CC	TT	TT	CC	CC	CC
AX-95018043	2D	14419282	A/G	GG	GG	GG	AA	GG	AA	GG	AA	GG	AA	GG	AA	GG	AA	GG	GG	AA	AA	AA	AA	AA	AA	AA	AA	AA	AA	GG	GG	GG	AA	AA	AA	AA	GG	AA	AA	AA	GG	GG	AA	AA	GG	GG	AA	AA	AA
AX-94794954	2D	16345303	A/T	AA	AA	AA	AA	AA	AA	AA	TT	TT	AA	AA	TT	AA	AA	AA	AA	AA	AA	TT	TT	TT	TT	TT	TT	TT	TT	TT	AA	AA	TT	TT	AA	AA	AA	TT	AA	TT	AA	AA	TT	AA	AA	AA	AA	TT	AA
AX-94842790	2D	19640699	C/T	CC	CC	CC	CC	CC	CC	CC	CC	CC	CC	CC	CC	CC	CC	CC	CC	CC	CC	CC	CC	CC	CC	CC	CC	CC	CC	CC	CC	CC	CC	CC	CC	CC	CC	CC	CC	CC	TT	CC	CC	CC	CC	CC	CC	CC	CC
AX-94844376	2D	19653062	C/T	TT	CC	TT	TT	TT	TT	TT	CC	CC	TT	CC	CC	CC	CC	CC	CC	TT	TT	CC	CC	CC	CC	CC	CC	CC	CC	CC	NN	CC	CC	CC	CC	TT	TT	CC	TT	CC	CC	TT	CC	TT	CC	CC	TT	CC	TT
AX-94401351	2D	22170557	C/T	TT	CC	TT	CC	TT	TT	TT	CC	CC	CC	CC	CC	CC	CC	TT	TT	CC	TT	TT	CC	TT	CC	CC	CC	CC	TT	CC	CC	CC	TT	TT	TT	TT	TT	CC	CC	CC	CC	TT	TT	CC	TT	CC	CC	TT	TT
AX-94792543	2D	27950230	T/G	GG	TT	GG	TT	GG	GG	GG	TT	TT	GG	GG	TT	TT	TT	TT	TT	GG	NN	TT	TT	TT	TT	TT	TT	TT	TT	GG	GG	TT	TT	TT	TT	GG	TT	TT	TT	TT	TT	TT	TT	GG	TT	TT	GG	TT	TT
AX-94627716	2D	32187804	C/A	AA	CC	CC	CC	AA	AA	CC	CC	AA	AA	AA	CC	AA	CC	CC	CC	AA	CC	CC	CC	CC	CC	CC	CC	CC	CC	CC	AA	CC	CC	CC	CC	AA	CC	CC	CC	CC	CC	AA	CC	AA	CC	AA	AA	CC	CC
AX-94603120	2D	33370550	T/C	CC	CC	TT	TT	CC	CC	TT	CC	TT	CC	CC	CC	TT	TT	TT	TT	CC	CC	TT	CC	TT	CC	TT	TT	TT	CC	CC	CC	TT	TT	TT	TT	CC	TT	CC	TT	CC	TT	TT	TT	CC	TT	TT	CC	TT	TT
AX-95110141	2D	33880216	T/C	TT	TT	CC	CC	TT	TT	CC	TT	CC	TT	TT	TT	CC	CC	CC	TT	TT	CC	CC	TT	TT	TT	TT	CC	CC	TT	TT	TT	TT	CC	TT	CC	TT	TT	TT	TT	TT	TT	CC	CC	TT	TT	CC	TT	CC	CC
AX-94735883	2D	35683613	G/A	GG	GG	AA	AA	GG	GG	AA	GG	GG	GG	GG	GG	AA	AA	AA	GG	GG	AA	AA	GG	GG	GG	GG	AA	AA	GG	GG	GG	AA	AA	GG	AA	GG	AA	GG	AA	GG	GG	AA	AA	GG	AA	AA	GG	AA	AA
AX-94806590	2D	36434280	C/G	GG	GG	GG	GG	GG	GG	GG	CC	CC	GG	CC	CC	GG	CC	CC	CC	GG	GG	CC	CC	CC	CC	CC	CC	CC	CC	CC	GG	CC	CC	CC	CC	GG	GG	CC	GG	CC	CC	GG	CC	GG	CC	GG	GG	CC	GG
AX-95228764	2D	42885859	C/T	TT	CC	CC	CC	TT	TT	CC	CC	CC	CC	TT	CC	TT	CC	CC	CC	TT	CC	CC	CC	CC	TT	CC	CC	CC	CC	CC	TT	CC	CC	CC	CC	TT	CC	CC	CC	CC	CC	CC	CC	TT	CC	CC	TT	CC	CC
AX-95124335	2D	52232828	G/A	GG	GG	GG	GG	GG	GG	GG	GG	GG	GG	GG	GG	GG	GG	GG	GG	GG	GG	GG	GG	AA	GG	GG	GG	GG	GG	GG	GG	GG	GG	GG	GG	GG	AA	GG	GG	GG	AA	GG	GG	GG	GG	GG	GG	GG	GG
AX-94459264	2D	61980156	G/C	CC	GG	GG	GG	CC	GG	GG	GG	GG	GG	CC	GG	GG	GG	GG	GG	CC	GG	GG	GG	GG	CC	GG	GG	GG	GG	CC	CC	GG	GG	GG	GG	GG	GG	GG	GG	GG	GG	GG	GG	GG	GG	GG	GG	GG	GG
AX-94823651	2D	62022862	C/A	AA	AA	CC	CC	AA	CC	CC	AA	AA	AA	AA	CC	AA	CC	CC	CC	AA	AA	CC	CC	AA	AA	CC	CC	CC	CC	AA	NN	CC	CC	CC	CC	CC	AA	CC	CC	AA	AA	AA	CC	CC	CC	AA	CC	CC	CC
AX-95242359	2D	62551489	T/C	CC	TT	TT	CC	CC	TT	TT	TT	TT	TT	CC	TT	TT	TT	TT	TT	CC	TT	TT	TT	TT	CC	TT	TT	TT	TT	CC	CC	TT	TT	TT	TT	TT	TT	TT	TT	TT	TT	TT	TT	TT	TT	TT	TT	TT	CC
AX-94461313	2D	65692174	T/C	TT	TT	TT	CC	TT	TT	TT	TT	CC	CC	TT	TT	TT	TT	TT	TT	TT	CC	TT	TT	TT	TT	TT	TT	TT	NN	CC	CC	TT	TT	TT	TT	TT	TT	TT	TT	TT	TT	TT	TT	TT	TT	TT	TT	TT	CC
AX-94654108	2D	67966410	T/C	TT	CC	TT	NN	TT	TT	TT	TT	NN	CC	TT	TT	CC	TT	TT	TT	TT	CC	TT	CC	TT	CC	CC	TT	TT	TT	CC	TT	TT	TT	TT	TT	TT	TT	CC	TT	TT	TT	TT	TT	TT	CC	TT	CC	TT	CC
AX-95139529	2D	67968892	T/C	TT	TT	TT	CC	TT	TT	TT	TT	CC	CC	TT	TT	TT	TT	TT	TT	TT	CC	TT	TT	TT	TT	TT	TT	TT	TT	CC	TT	TT	TT	TT	TT	TT	TT	TT	TT	TT	TT	TT	TT	TT	TT	TT	TT	TT	CC
AX-95016209	2D	71384124	T/C	TT	CC	TT	CC	TT	CC	TT	TT	CC	CC	TT	TT	TT	CC	TT	TT	TT	CC	TT	TT	TT	TT	TT	TT	TT	TT	CC	TT	CC	TT	TT	TT	TT	TT	TT	TT	TT	TT	TT	TT	TT	TT	TT	TT	TT	CC
AX-95081347	2D	73426448	C/T	TT	TT	CC	CC	TT	TT	CC	CC	CC	CC	TT	TT	TT	CC	CC	CC	TT	CC	CC	TT	TT	TT	CC	CC	CC	CC	CC	TT	TT	CC	CC	CC	TT	TT	TT	CC	CC	TT	CC	CC	TT	CC	CC	TT	CC	CC
AX-94662189	2D	74929564	G/C	CC	GG	GG	GG	CC	CC	GG	GG	GG	GG	CC	CC	CC	GG	GG	GG	CC	GG	GG	CC	GG	CC	GG	GG	GG	GG	GG	CC	CC	GG	GG	GG	CC	GG	CC	GG	GG	GG	GG	GG	CC	GG	GG	CC	GG	GG
AX-94461801	2D	76794961	G/T	TT	GG	GG	GG	TT	GG	GG	GG	TT	TT	TT	GG	TT	GG	GG	GG	TT	GG	GG	GG	GG	TT	GG	GG	GG	GG	TT	TT	GG	GG	GG	GG	GG	GG	GG	GG	GG	GG	GG	GG	GG	GG	GG	GG	GG	GG
AX-94829628	2D	78080362	G/C	GG	GG	GG	GG	GG	GG	GG	GG	CC	CC	GG	GG	GG	GG	GG	GG	GG	GG	GG	CC	GG	GG	GG	GG	GG	GG	CC	GG	GG	GG	GG	GG	GG	GG	CC	GG	GG	GG	GG	GG	GG	GG	GG	GG	GG	GG
AX-94652914	2D	78711333	G/A	AA	AA	GG	GG	AA	AA	GG	GG	GG	GG	AA	GG	AA	GG	GG	GG	AA	GG	GG	GG	GG	AA	GG	GG	GG	GG	GG	AA	GG	GG	GG	GG	AA	AA	GG	GG	GG	GG	GG	GG	AA	GG	GG	AA	GG	GG
AX-94959623	2D	79541179	T/C	CC	TT	TT	TT	CC	CC	TT	TT	TT	TT	CC	TT	CC	TT	TT	TT	CC	TT	TT	TT	TT	CC	TT	TT	TT	TT	TT	NN	TT	TT	NN	TT	CC	TT	TT	CC	TT	TT	TT	CC	CC	TT	TT	CC	TT	TT
AX-94656661	2D	80834616	A/G	GG	GG	AA	AA	GG	GG	AA	AA	AA	AA	GG	AA	GG	AA	AA	AA	GG	AA	AA	AA	AA	GG	AA	AA	AA	AA	AA	GG	AA	AA	AA	AA	GG	GG	AA	AA	AA	AA	AA	AA	GG	AA	AA	GG	AA	AA
AX-94960755	2D	81968687	A/C	AA	AA	AA	AA	AA	AA	AA	CC	CC	CC	AA	AA	AA	CC	AA	AA	CC	AA	CC	CC	AA	AA	AA	CC	AA	AA	CC	AA	CC	AA	AA	CC	AA	AA	CC	AA	CC	AA	NN	CC	AA	AA	CC	AA	AA	AA
AX-95181452	2D	83142048	C/T	TT	TT	CC	CC	TT	TT	CC	CC	CC	CC	TT	CC	TT	CC	CC	CC	TT	CC	CC	CC	CC	CC	CC	CC	CC	CC	CC	TT	CC	CC	CC	CC	TT	TT	CC	CC	CC	CC	CC	CC	TT	CC	CC	TT	CC	CC
AX-95143232	2D	95418341	A/G	AA	GG	AA	AA	AA	AA	AA	AA	AA	AA	AA	AA	GG	AA	AA	AA	AA	AA	AA	GG	AA	GG	GG	AA	AA	AA	AA	AA	AA	AA	AA	AA	AA	AA	GG	AA	AA	AA	AA	AA	AA	GG	AA	GG	AA	AA
AX-95235201	2D	108928305	A/G	AA	AA	AA	AA	AA	AA	AA	GG	AA	GG	AA	AA	AA	GG	AA	AA	AA	AA	GG	AA	AA	AA	AA	AA	AA	AA	AA	NN	AA	AA	AA	NN	AA	AA	AA	AA	GG	AA	AA	AA	AA	AA	GG	AA	AA	AA
AX-95657294	2D	109702597	A/G	AA	GG	AA	AA	AA	AA	AA	AA	AA	AA	AA	AA	AA	AA	AA	AA	AA	AA	AA	GG	AA	GG	AA	GG	AA	AA	AA	AA	GG	AA	AA	AA	AA	AA	GG	AA	AA	AA	AA	AA	AA	AA	AA	AA	AA	AA
AX-94709516	2D	130988045	G/A	GG	GG	GG	GG	GG	GG	GG	AA	GG	AA	GG	GG	GG	AA	GG	GG	GG	GG	AA	GG	GG	GG	GG	GG	AA	GG	GG	GG	GG	GG	GG	GG	GG	GG	GG	GG	AA	GG	GG	GG	GG	GG	AA	GG	GG	GG
AX-94536208	2D	131311996	T/C	TT	TT	TT	TT	TT	TT	TT	TT	TT	CC	TT	CC	TT	CC	TT	TT	CC	TT	CC	TT	TT	CC	TT	TT	TT	TT	TT	TT	CC	TT	CC	TT	CC	TT	TT	CC	TT	TT	TT	TT	CC	TT	TT	CC	TT	TT
AX-94704180	2D	135500165	G/C	GG	GG	GG	GG	GG	CC	GG	GG	GG	GG	GG	CC	GG	GG	GG	GG	GG	GG	GG	GG	GG	GG	CC	GG	GG	GG	GG	GG	GG	GG	GG	CC	CC	CC	GG	GG	GG	GG	GG	GG	CC	GG	GG	CC	GG	CC
AX-94439020	2D	153047534	G/A	GG	AA	GG	GG	GG	GG	GG	GG	GG	GG	GG	GG	GG	GG	GG	GG	GG	GG	GG	AA	GG	GG	GG	AA	GG	GG	GG	GG	AA	GG	GG	GG	GG	GG	AA	GG	AA	GG	GG	GG	GG	GG	GG	GG	GG	GG
AX-94486919	2D	170401776	T/C	TT	TT	TT	TT	TT	TT	TT	TT	TT	TT	TT	TT	CC	TT	TT	TT	TT	TT	TT	TT	TT	CC	CC	TT	TT	TT	TT	TT	TT	TT	TT	TT	TT	TT	CC	TT	TT	TT	TT	TT	TT	TT	TT	CC	TT	TT
AX-94989875	2D	223913134	A/G	AA	AA	AA	GG	GG	AA	AA	AA	AA	GG	AA	AA	AA	AA	AA	AA	AA	AA	AA	GG	AA	AA	AA	GG	GG	AA	AA	NN	GG	AA	AA	AA	AA	GG	GG	AA	AA	AA	GG	AA	AA	AA	AA	AA	AA	AA
AX-94587407	2D	310087577	C/T	CC	CC	CC	CC	CC	CC	CC	NN	CC	CC	CC	CC	CC	CC	TT	CC	CC	CC	NN	CC	CC	CC	CC	CC	NN	TT	TT	CC	CC	CC	CC	CC	CC	CC	CC	CC	TT	CC	TT	CC	CC	CC	NN	CC	CC	CC
AX-94503865	2D	325247427	A/G	GG	AA	GG	AA	AA	AA	GG	GG	GG	GG	GG	AA	AA	AA	GG	AA	AA	AA	AA	GG	GG	GG	GG	GG	GG	GG	GG	GG	AA	GG	GG	GG	AA	AA	GG	GG	AA	AA	GG	GG	AA	GG	AA	AA	AA	AA
AX-94975854	2D	347798203	A/G	AA	AA	AA	AA	AA	AA	AA	AA	AA	AA	AA	AA	GG	AA	AA	AA	AA	AA	AA	GG	AA	GG	AA	GG	AA	AA	AA	AA	AA	AA	AA	AA	AA	AA	GG	AA	GG	AA	AA	AA	AA	AA	AA	GG	AA	AA
AX-94670144	2D	349559609	G/A	GG	GG	GG	GG	GG	GG	GG	AA	AA	GG	GG	GG	GG	AA	GG	GG	GG	GG	AA	AA	GG	GG	GG	AA	AA	GG	AA	GG	AA	GG	GG	GG	GG	GG	AA	GG	AA	GG	GG	GG	GG	GG	AA	GG	GG	GG
AX-94470776	2D	369482424	G/A	AA	AA	AA	GG	GG	GG	GG	GG	GG	AA	AA	GG	AA	GG	GG	GG	AA	GG	GG	GG	GG	AA	GG	GG	GG	GG	GG	AA	GG	GG	GG	GG	GG	GG	GG	AA	GG	GG	GG	GG	GG	GG	GG	GG	GG	GG
AX-94637828	2D	372598500	A/C	CC	CC	CC	CC	CC	CC	AA	AA	AA	CC	CC	AA	CC	AA	AA	AA	CC	AA	AA	CC	AA	CC	AA	CC	CC	AA	AA	CC	CC	AA	AA	AA	AA	CC	CC	CC	AA	AA	CC	AA	AA	AA	AA	AA	AA	AA
AX-94659739	2D	381335181	A/G	AA	GG	GG	GG	AA	AA	GG	GG	GG	GG	AA	AA	AA	GG	AA	GG	AA	AA	AA	GG	GG	AA	AA	GG	GG	GG	GG	GG	AA	GG	GG	AA	AA	AA	GG	AA	GG	GG	GG	AA	AA	GG	GG	AA	GG	AA
AX-94814305	2D	381335540	C/T	TT	CC	CC	CC	TT	CC	CC	CC	CC	CC	TT	CC	TT	CC	TT	CC	CC	CC	TT	CC	CC	TT	TT	CC	CC	CC	CC	CC	TT	CC	CC	TT	CC	CC	CC	CC	CC	CC	CC	TT	CC	CC	CC	CC	CC	CC
AX-94612882	2D	389278092	G/A	AA	GG	GG	GG	GG	AA	GG	GG	GG	GG	GG	AA	GG	GG	AA	AA	GG	AA	GG	AA	GG	AA	GG	GG	GG	AA	GG	GG	AA	AA	GG	GG	AA	GG	AA	GG	GG	AA	GG	AA	GG	GG	GG	AA	GG	GG
AX-95156986	2D	401290077	G/A	GG	GG	GG	GG	GG	GG	GG	GG	GG	GG	GG	GG	GG	GG	GG	GG	GG	GG	GG	GG	GG	GG	GG	GG	AA	GG	GG	GG	GG	GG	GG	GG	GG	GG	GG	GG	GG	GG	GG	GG	GG	GG	GG	GG	GG	GG
AX-95683514	2D	409601369	A/G	GG	GG	GG	GG	AA	GG	AA	AA	GG	GG	GG	AA	GG	AA	AA	AA	GG	AA	AA	GG	AA	GG	AA	AA	GG	GG	GG	GG	GG	GG	AA	AA	AA	AA	GG	GG	AA	AA	GG	AA	AA	AA	AA	GG	AA	AA
AX-95101730	2D	411414995	A/G	GG	AA	AA	AA	AA	GG	AA	AA	AA	AA	AA	GG	AA	AA	GG	GG	AA	GG	AA	GG	AA	GG	AA	AA	AA	GG	AA	AA	GG	GG	AA	AA	GG	AA	GG	AA	AA	GG	AA	GG	AA	AA	AA	GG	AA	AA
AX-95134713	2D	423877919	G/A	AA	GG	GG	AA	GG	GG	GG	GG	GG	GG	GG	GG	GG	GG	GG	GG	GG	GG	GG	GG	GG	GG	GG	GG	GG	GG	GG	GG	GG	GG	GG	GG	GG	GG	GG	GG	GG	GG	GG	GG	AA	GG	GG	GG	GG	GG
AX-95142594	2D	425745799	G/T	GG	GG	GG	GG	TT	GG	TT	GG	GG	GG	GG	TT	GG	GG	TT	TT	GG	TT	GG	GG	TT	GG	TT	TT	TT	GG	GG	GG	GG	GG	TT	TT	TT	TT	GG	GG	GG	TT	GG	TT	TT	TT	GG	GG	TT	TT
AX-94841680	2D	429091895	G/C	GG	GG	GG	GG	CC	GG	GG	CC	GG	GG	GG	GG	GG	CC	GG	GG	GG	GG	CC	GG	GG	GG	GG	GG	GG	GG	GG	GG	GG	GG	GG	GG	GG	CC	GG	GG	CC	GG	GG	GG	GG	GG	CC	GG	GG	GG
AX-95138710	2D	445894333	G/A	GG	AA	GG	GG	GG	GG	GG	GG	AA	AA	GG	GG	GG	GG	GG	GG	GG	GG	GG	AA	GG	AA	GG	GG	GG	AA	AA	GG	AA	AA	GG	GG	GG	GG	AA	GG	AA	GG	GG	GG	GG	GG	AA	AA	GG	GG
AX-94893273	2D	465642314	C/G	CC	GG	CC	GG	CC	CC	GG	GG	GG	GG	GG	GG	CC	CC	CC	GG	CC	CC	CC	GG	CC	GG	CC	GG	CC	CC	GG	CC	CC	GG	CC	GG	CC	CC	GG	CC	GG	CC	GG	NN	GG	CC	GG	GG	CC	CC
[truncated: 2,661 more rows]
[truncated: 93 more columns]

## Sheet: Table S5
Table S5: distribution of selected Axiom35K markers across the wheat genome
[truncated: 23 more rows]

## Sheet: Table S6
Table S6: Population grouping information of UK wheat varieties based on DAPC analysis
[truncated: 141 more rows]

[truncated: 1 more sheets: Table S7]
